# Supplementary material for: Native American genetic ancestry and pigmentation allele contributions to skin color in a Caribbean population
Source: eLife. 2023 Jun 9;12:e77514. doi: 10.7554/eLife.77514 (PMC10371226; doi:10.7554/eLife.77514)
Supplement: Figure 1—source data 1. [file elife-77514-fig1-data1.xlsx]

## Sheet: Fig 1- Admixture
Pop	IID	EAS	AMR	AFR	EUR	OCE	CSA			iid	EAS	AMR	AFR	OCE	EUR		iid	fid_iid	EAS	AMR	AFR	EUR		fid_iid+[kal_summary.5.Q_combined.xlsx]kal_summary.5.Q_combined!$A:$F	AMR/EAS	AFR	EUR
African	BIAK_475	1.16667e-05	1e-05	0.999945	1e-05	1e-05	1.28889e-05			BIAK_475	1e-05	1e-05	0.99996	1.04444e-05	1e-05		475	BIAK_475	1e-05	1e-05	0.99997	1e-05		BIAK_475	1e-05	0.99998	1e-05		BIAK_475	1e-05	0.99999
African	BIAK_1094	1.17778e-05	1.05556e-05	0.999946	1.04444e-05	1e-05	1.11111e-05			BIAK_1094	1.08889e-05	1e-05	0.999958	1.13333e-05	1e-05		1094	BIAK_1094	1.01111e-05	1e-05	0.99997	1e-05		BIAK_1094	1e-05	0.999979	1.11111e-05		BIAK_1094	1e-05	0.99999
African	BIAK_1090	1.1e-05	1e-05	0.999946	1.16667e-05	1e-05	1.11111e-05			BIAK_1090	1e-05	1e-05	0.99996	1e-05	1e-05		1090	BIAK_1090	1e-05	1e-05	0.99997	1e-05		BIAK_1090	1e-05	0.99998	1e-05		BIAK_1090	1e-05	0.99999
African	BIAK_459	1.11111e-05	1.03333e-05	0.999947	1.03333e-05	1e-05	1.13333e-05			BIAK_459	1e-05	1e-05	0.99996	1e-05	1e-05		459	BIAK_459	1e-05	1e-05	0.99997	1e-05		BIAK_459	1e-05	0.999979	1.11111e-05		BIAK_459	1e-05	0.99999
African	BIAK_470	1.11111e-05	1e-05	0.999947	1e-05	1e-05	1.16667e-05			BIAK_470	1e-05	1e-05	0.99996	1e-05	1e-05		470	BIAK_470	1e-05	1e-05	0.99997	1e-05		BIAK_470	1e-05	0.999979	1.05556e-05		BIAK_470	1e-05	0.99999
African	BIAK_457	1e-05	1e-05	0.999948	1.11111e-05	1e-05	1.08889e-05			BIAK_457	1e-05	1e-05	0.99996	1e-05	1e-05		457	BIAK_457	1e-05	1e-05	0.99997	1e-05		BIAK_457	1e-05	0.99998	1e-05		BIAK_457	1e-05	0.99999
African	BIAK_460	1.1e-05	1e-05	0.999948	1e-05	1e-05	1.06667e-05			BIAK_460	1.03333e-05	1e-05	0.99996	1e-05	1e-05		460	BIAK_460	1.01111e-05	1.01111e-05	0.99997	1e-05		BIAK_460	1e-05	0.99998	1e-05		BIAK_460	1e-05	0.99999
African	BIAK_479	1.03333e-05	1e-05	0.999948	1.04444e-05	1e-05	1.07778e-05			BIAK_479	1.01111e-05	1e-05	0.99996	1e-05	1e-05		479	BIAK_479	1e-05	1.04444e-05	0.99997	1e-05		BIAK_479	1e-05	0.999979	1.08889e-05		BIAK_479	1e-05	0.99999
African	BIAK_454	1.11111e-05	1e-05	0.999949	1e-05	1e-05	1.02222e-05			BIAK_454	1e-05	1e-05	0.99996	1e-05	1e-05		454	BIAK_454	1e-05	1e-05	0.99997	1e-05		BIAK_454	1e-05	0.99998	1.01111e-05		BIAK_454	1e-05	0.99999
African	BIAK_472	1e-05	1.01111e-05	0.999949	1.13333e-05	1e-05	1e-05			BIAK_472	1e-05	1e-05	0.99996	1e-05	1e-05		472	BIAK_472	1e-05	1.01111e-05	0.99997	1e-05		BIAK_472	1e-05	0.99998	1e-05		BIAK_472	1e-05	0.99999
African	BIAK_464	1.06667e-05	1e-05	0.999949	1e-05	1e-05	1.06667e-05			BIAK_464	1e-05	1e-05	0.99996	1e-05	1e-05		464	BIAK_464	1e-05	1e-05	0.99997	1e-05		BIAK_464	1e-05	0.99998	1e-05		BIAK_464	1e-05	0.99999
African	BIAK_469	1.11111e-05	1e-05	0.999949	1e-05	1e-05	1.01111e-05			BIAK_469	1e-05	1e-05	0.99996	1e-05	1e-05		469	BIAK_469	1e-05	1e-05	0.99997	1e-05		BIAK_469	1e-05	0.99998	1e-05		BIAK_469	1e-05	0.99999
African	BIAK_461	1e-05	1e-05	0.999949	1.03333e-05	1e-05	1.07778e-05			BIAK_461	1e-05	1e-05	0.99996	1e-05	1e-05		461	BIAK_461	1e-05	1.01111e-05	0.99997	1e-05		BIAK_461	1e-05	0.99998	1e-05		BIAK_461	1e-05	0.99999
African	BIAK_986	1e-05	1.02222e-05	0.999949	1.05556e-05	1e-05	1.03333e-05			BIAK_986	1e-05	1e-05	0.99996	1e-05	1e-05		986	BIAK_986	1e-05	1e-05	0.99997	1e-05		BIAK_986	1e-05	0.99998	1e-05		BIAK_986	1e-05	0.99999
African	BIAK_455	1.08889e-05	1e-05	0.999949	1e-05	1e-05	1e-05			BIAK_455	1.08889e-05	1e-05	0.999959	1e-05	1e-05		455	BIAK_455	1.07778e-05	1.01111e-05	0.999969	1e-05		BIAK_455	1e-05	0.99998	1e-05		BIAK_455	1e-05	0.99999
African	BIAK_465	1.08889e-05	1e-05	0.999949	1e-05	1e-05	1e-05			BIAK_465	1e-05	1e-05	0.99996	1e-05	1e-05		465	BIAK_465	1e-05	1e-05	0.999969	1.08889e-05		BIAK_465	1e-05	0.99998	1e-05		BIAK_465	1e-05	0.99999
African	BIAK_466	1e-05	1.04444e-05	0.999949	1e-05	1e-05	1.04444e-05			BIAK_466	1e-05	1e-05	0.99996	1e-05	1e-05		466	BIAK_466	1e-05	1e-05	0.99997	1e-05		BIAK_466	1e-05	0.99998	1e-05		BIAK_466	1e-05	0.99999
African	BIAK_458	1.03333e-05	1e-05	0.99995	1e-05	1e-05	1e-05			BIAK_458	1e-05	1e-05	0.99996	1e-05	1e-05		458	BIAK_458	1.08889e-05	1e-05	0.999969	1e-05		BIAK_458	1e-05	0.99998	1e-05		BIAK_458	1e-05	0.99999
African	BIAK_473	1e-05	1e-05	0.99995	1e-05	1e-05	1e-05			BIAK_473	1e-05	1.07778e-05	0.999959	1e-05	1e-05		473	BIAK_473	1e-05	1e-05	0.99997	1e-05		BIAK_473	1e-05	0.999979	1.05556e-05		BIAK_473	1e-05	0.99999
African	BIAK_985	1e-05	1e-05	0.99995	1e-05	1e-05	1e-05			BIAK_985	1e-05	1e-05	0.99996	1e-05	1e-05		985	BIAK_985	1e-05	1.01111e-05	0.99997	1e-05		BIAK_985	1e-05	0.99998	1.04444e-05		BIAK_985	1e-05	0.99999
African	BIAK_1086	1e-05	1e-05	0.99995	1e-05	1e-05	1e-05			BIAK_1086	1e-05	1e-05	0.99996	1e-05	1e-05		1086	BIAK_1086	1e-05	1.08889e-05	0.999969	1e-05		BIAK_1086	1e-05	0.999979	1.1e-05		BIAK_1086	1e-05	0.99999
African	MBUT_462	1.14444e-05	1e-05	0.999948	1e-05	1e-05	1.07778e-05			MBUT_462	1e-05	1e-05	0.99996	1e-05	1e-05		462	MBUT_462	1e-05	1e-05	0.99997	1e-05		MBUT_462	1e-05	0.99998	1e-05		MBUT_462	1e-05	0.99999
African	MBUT_467	1.03333e-05	1e-05	0.999948	1.08889e-05	1e-05	1.04444e-05			MBUT_467	1e-05	1e-05	0.99996	1e-05	1e-05		467	MBUT_467	1e-05	1e-05	0.99997	1e-05		MBUT_467	1e-05	0.99998	1e-05		MBUT_467	1e-05	0.99999
African	MBUT_1081	1.1e-05	1e-05	0.999948	1e-05	1e-05	1.06667e-05			MBUT_1081	1.06667e-05	1e-05	0.999959	1e-05	1e-05		1081	MBUT_1081	1.06667e-05	1e-05	0.999969	1e-05		MBUT_1081	1e-05	0.99998	1.02222e-05		MBUT_1081	1e-05	0.99999
African	MBUT_449	1e-05	1e-05	0.999949	1e-05	1e-05	1.11111e-05			MBUT_449	1e-05	1e-05	0.99996	1e-05	1e-05		449	MBUT_449	1e-05	1e-05	0.99997	1e-05		MBUT_449	1e-05	0.999979	1.06667e-05		MBUT_449	1e-05	0.99999
African	MBUT_463	1.11111e-05	1e-05	0.999949	1e-05	1e-05	1e-05			MBUT_463	1e-05	1e-05	0.99996	1e-05	1e-05		463	MBUT_463	1e-05	1e-05	0.99997	1e-05		MBUT_463	1e-05	0.99998	1e-05		MBUT_463	1e-05	0.99999
African	MBUT_471	1.08889e-05	1e-05	0.999949	1e-05	1e-05	1e-05			MBUT_471	1.04444e-05	1e-05	0.99996	1e-05	1e-05		471	MBUT_471	1e-05	1e-05	0.99997	1e-05		MBUT_471	1e-05	0.99998	1e-05		MBUT_471	1e-05	0.99999
African	MBUT_982	1.01111e-05	1e-05	0.999949	1e-05	1e-05	1.07778e-05			MBUT_982	1e-05	1e-05	0.99996	1.01111e-05	1e-05		982	MBUT_982	1e-05	1.03333e-05	0.99997	1e-05		MBUT_982	1e-05	0.99998	1e-05		MBUT_982	1e-05	0.99999
African	MBUT_474	1.02222e-05	1.02222e-05	0.999949	1.01111e-05	1e-05	1e-05			MBUT_474	1e-05	1e-05	0.99996	1.04444e-05	1e-05		474	MBUT_474	1e-05	1e-05	0.99997	1e-05		MBUT_474	1e-05	0.99998	1.03333e-05		MBUT_474	1e-05	0.99999
African	MBUT_476	1e-05	1e-05	0.99995	1e-05	1e-05	1.04444e-05			MBUT_476	1e-05	1e-05	0.99996	1e-05	1e-05		476	MBUT_476	1e-05	1e-05	0.99997	1e-05		MBUT_476	1e-05	0.99998	1.03333e-05		MBUT_476	1e-05	0.99999
African	MBUT_984	1.04444e-05	1e-05	0.99995	1e-05	1e-05	1e-05			MBUT_984	1e-05	1e-05	0.99996	1e-05	1e-05		984	MBUT_984	1e-05	1e-05	0.99997	1e-05		MBUT_984	1e-05	0.99998	1e-05		MBUT_984	1e-05	0.99999
African	MBUT_450	1e-05	1e-05	0.99995	1e-05	1e-05	1.01111e-05			MBUT_450	1e-05	1e-05	0.99996	1e-05	1e-05		450	MBUT_450	1e-05	1.01111e-05	0.99997	1e-05		MBUT_450	1e-05	0.99998	1e-05		MBUT_450	1e-05	0.99999
African	MBUT_456	1e-05	1e-05	0.99995	1.01111e-05	1e-05	1e-05			MBUT_456	1e-05	1e-05	0.999959	1.07778e-05	1e-05		456	MBUT_456	1e-05	1e-05	0.99997	1e-05		MBUT_456	1e-05	0.99998	1.01111e-05		MBUT_456	1e-05	0.99999
African	MBUT_478	1e-05	1e-05	0.99995	1e-05	1e-05	1e-05			MBUT_478	1e-05	1e-05	0.99996	1e-05	1e-05		478	MBUT_478	1e-05	1.04444e-05	0.99997	1e-05		MBUT_478	1e-05	0.999979	1.08889e-05		MBUT_478	1e-05	0.99999
African	YOR_934	1.02222e-05	1e-05	0.959477	0.0364349	0.00405811	1e-05			YOR_934	1e-05	1e-05	0.960752	0.00482511	0.0344032		934	YOR_934	1.06667e-05	1e-05	0.961793	0.0381862		YOR_934	1e-05	0.960805	0.0391854		YOR_934	0.002562	0.997438
African	YOR_943	0.00210689	1e-05	0.960338	0.0361811	1e-05	0.00135433			YOR_943	0.00199144	1e-05	0.961027	1e-05	0.036961		943	YOR_943	0.00130156	1e-05	0.961103	0.0375859		YOR_943	1e-05	0.960354	0.0396358		YOR_943	0.00265411	0.997346
African	YOR_939	1e-05	1e-05	0.961011	0.0358866	0.00307178	1e-05			YOR_939	1.07778e-05	1e-05	0.962582	0.00380111	0.0335964		939	YOR_939	1e-05	1e-05	0.963531	0.0364493		YOR_939	1e-05	0.962839	0.0371508		YOR_939	0.00153633	0.998464
African	YOR_925	1.1e-05	1e-05	0.962157	0.0378016	1e-05	1e-05			YOR_925	9.36667e-05	1e-05	0.962967	1e-05	0.0369192		925	YOR_925	1e-05	1e-05	0.962965	0.0370148		YOR_925	1e-05	0.962266	0.0377242		YOR_925	0.005198	0.994802
African	YOR_924	1e-05	1e-05	0.962459	0.0375014	1e-05	1e-05			YOR_924	1e-05	1e-05	0.963052	1e-05	0.0369181		924	YOR_924	1.05556e-05	1e-05	0.963029	0.0369509		YOR_924	1e-05	0.962248	0.0377424		YOR_924	1e-05	0.99999
African	YOR_931	1e-05	1e-05	0.962588	0.0373723	1e-05	1e-05			YOR_931	1e-05	1e-05	0.963973	1e-05	0.0359969		931	YOR_931	1e-05	1e-05	0.963895	0.0360846		YOR_931	1e-05	0.963192	0.0367981		YOR_931	3.52222e-05	0.999965
African	YOR_938	1e-05	1e-05	0.963873	0.0360869	1e-05	1.01111e-05			YOR_938	1e-05	1.02222e-05	0.965255	1e-05	0.034715		938	YOR_938	1e-05	1e-05	0.965182	0.0347984		YOR_938	1e-05	0.964602	0.0353879		YOR_938	0.00289	0.99711
African	YOR_937	1e-05	1e-05	0.964751	0.0352091	1e-05	1e-05			YOR_937	1e-05	1e-05	0.965567	1e-05	0.0344034		937	YOR_937	1e-05	1e-05	0.965581	0.034399		YOR_937	1e-05	0.964898	0.0350922		YOR_937	0.00171122	0.998289
African	YOR_928	1e-05	1.06667e-05	0.964825	0.0351348	1e-05	1e-05			YOR_928	1e-05	2.14444e-05	0.965933	1e-05	0.0340257		928	YOR_928	1e-05	4.01111e-05	0.965824	0.0341254		YOR_928	1e-05	0.965297	0.034693		YOR_928	0.00329956	0.9967
African	YOR_929	1e-05	1e-05	0.9652	0.0336587	0.00111144	1e-05			YOR_929	1e-05	1e-05	0.965841	0.00125456	0.0328841		929	YOR_929	1e-05	2.04444e-05	0.966135	0.0338349		YOR_929	1e-05	0.965468	0.0345217		YOR_929	0.00356544	0.996435
African	YOR_930	1.06667e-05	1e-05	0.965231	0.0338119	0.000926889	1e-05			YOR_930	1e-05	1e-05	0.966262	0.00126522	0.0324524		930	YOR_930	1e-05	1e-05	0.966592	0.0333881		YOR_930	1e-05	0.965708	0.0342819		YOR_930	0.00479178	0.995208
African	YOR_932	1e-05	1e-05	0.965936	0.0277361	0.00629756	1e-05			YOR_932	1e-05	1e-05	0.966853	0.00683267	0.0262943		932	YOR_932	0.00103433	1e-05	0.968472	0.0304834		YOR_932	1e-05	0.967699	0.0322909		YOR_932	0.00392678	0.996073
African	YOR_927	1.05556e-05	1e-05	0.966724	0.0332359	1e-05	1e-05			YOR_927	1.03333e-05	1e-05	0.96779	1e-05	0.0321797		927	YOR_927	1.01111e-05	1e-05	0.967765	0.0322153		YOR_927	1e-05	0.967076	0.0329137		YOR_927	0.00247067	0.997529
African	YOR_941	1e-05	1e-05	0.966725	0.0332351	1e-05	1e-05			YOR_941	1e-05	1.01111e-05	0.968307	1e-05	0.0316631		941	YOR_941	1e-05	1e-05	0.96831	0.0316704		YOR_941	1e-05	0.967752	0.0322382		YOR_941	0.00216178	0.997838
African	YOR_942	1.04444e-05	1e-05	0.966903	0.0330562	1e-05	1e-05			YOR_942	1e-05	1.02222e-05	0.968271	1e-05	0.0316988		942	YOR_942	1e-05	1e-05	0.968273	0.0317073		YOR_942	1e-05	0.967524	0.0324661		YOR_942	0.00328989	0.99671
African	YOR_935	1e-05	1e-05	0.966969	0.0327229	0.000278111	1e-05			YOR_935	1.04444e-05	1e-05	0.967606	0.000556444	0.0318179		935	YOR_935	1e-05	1e-05	0.967697	0.0322827		YOR_935	1e-05	0.967011	0.0329794		YOR_935	1e-05	0.99999
African	YOR_926	1.06667e-05	1e-05	0.968792	0.0311672	1e-05	1.03333e-05			YOR_926	1e-05	1e-05	0.970189	1e-05	0.0297808		926	YOR_926	1.1e-05	1e-05	0.970208	0.0297709		YOR_926	1e-05	0.968983	0.0310072		YOR_926	0.000975778	0.999024
African	YOR_936	1.05556e-05	1e-05	0.969204	0.0301897	0.000575667	1e-05			YOR_936	1e-05	1e-05	0.97037	0.00109522	0.0285144		936	YOR_936	1.07778e-05	1e-05	0.970605	0.0293741		YOR_936	1e-05	0.969508	0.0304822		YOR_936	0.000168111	0.999832
African	YOR_920	0.000265444	1e-05	0.969362	0.0291582	0.000251667	0.000952222			YOR_920	9.74444e-05	1e-05	0.96983	0.000782556	0.0292794		920	YOR_920	1.2e-05	1e-05	0.970034	0.0299436		YOR_920	1e-05	0.96915	0.0308397		YOR_920	0.00280711	0.997193
African	YOR_940	1e-05	1e-05	0.97304	0.0269201	1e-05	1e-05			YOR_940	1e-05	1e-05	0.974081	1e-05	0.0258889		940	YOR_940	1e-05	1e-05	0.974085	0.0258947		YOR_940	1e-05	0.973197	0.0267931		YOR_940	1e-05	0.99999
African	YOR_933	1.02222e-05	1e-05	0.973523	0.0264362	1e-05	1.04444e-05			YOR_933	1e-05	1e-05	0.974885	1e-05	0.0250849		933	YOR_933	1.05556e-05	1e-05	0.974894	0.0250859		YOR_933	1e-05	0.9741	0.0258903		YOR_933	0.000797889	0.999202
African	SABANT_1028	0.00528333	1e-05	0.95479	0.0342054	0.00405311	0.00165833			SABANT_1028	0.00505711	1e-05	0.955325	0.00443756	0.0351703		1028	SABANT_1028	0.00697467	1e-05	0.956145	0.0368702		SABANT_1028	0.00519	0.955732	0.039078		SABANT_1028	0.00876889	0.991231
African	SABANT_1034	1e-05	1e-05	0.96285	0.0316747	0.00250978	0.00294544			SABANT_1034	1e-05	1e-05	0.963338	0.00286911	0.0337729		1034	SABANT_1034	0.000238889	1e-05	0.963937	0.0358139		SABANT_1034	1e-05	0.9633	0.0366898		SABANT_1034	0.00376044	0.99624
African	SABANT_1031	1e-05	1e-05	0.964707	0.0287006	0.000932889	0.00563911			SABANT_1031	1e-05	1e-05	0.965313	0.00150056	0.0331664		1031	SABANT_1031	1.11111e-05	1e-05	0.965691	0.0342877		SABANT_1031	1e-05	0.965043	0.034947		SABANT_1031	0.001901	0.998099
African	SABANT_1033	1.03333e-05	1e-05	0.965235	0.0340888	1e-05	0.000645889			SABANT_1033	1.03333e-05	1e-05	0.965921	1e-05	0.0340482		1033	SABANT_1033	1.03333e-05	1e-05	0.965887	0.0340926		SABANT_1033	1e-05	0.965106	0.0348842		SABANT_1033	5.26667e-05	0.999947
African	SABANT_1035	1.02222e-05	1e-05	0.966772	0.0331881	1e-05	1e-05			SABANT_1035	1.02222e-05	1e-05	0.967704	1e-05	0.0322662		1035	SABANT_1035	1.01111e-05	1e-05	0.96769	0.0322899		SABANT_1035	1e-05	0.966956	0.0330339		SABANT_1035	0.00440256	0.995597
African	SABANT_993	1e-05	0.00109844	0.97268	0.0203072	1e-05	0.00589433			SABANT_993	1e-05	0.00174444	0.973444	1e-05	0.0247916		993	SABANT_993	1e-05	0.00174033	0.973432	0.0248179		SABANT_993	1e-05	0.973278	0.0267116		SABANT_993	0.00361533	0.996385
African	SABANT_994	1e-05	1e-05	0.974107	0.0229579	0.00290444	1.01111e-05			SABANT_994	1e-05	1e-05	0.974706	0.00328178	0.0219928		994	SABANT_994	1e-05	1e-05	0.975589	0.0243914		SABANT_994	1e-05	0.974664	0.0253261		SABANT_994	0.00164711	0.998353
African	SABANT_1030	0.000313556	1e-05	0.982465	0.0105956	0.00531856	0.00129778			SABANT_1030	0.00128389	1e-05	0.98309	0.00563378	0.00998278		1030	SABANT_1030	0.00402822	1e-05	0.984052	0.01191		SABANT_1030	0.00227144	0.983817	0.0139117		SABANT_1030	0.00466989	0.99533
African	MAND_918	1.15556e-05	1e-05	0.914353	0.0803164	0.00529922	1e-05			MAND_918	1e-05	1e-05	0.915359	0.00511033	0.0795106		918	MAND_918	1.03333e-05	1e-05	0.916579	0.0834011		MAND_918	1e-05	0.9157	0.0842899		MAND_918	0.00816167	0.991838
African	MAND_911	1e-05	1e-05	0.932036	0.0629674	0.00496678	1e-05			MAND_911	1e-05	1e-05	0.932855	0.00471722	0.0624083		911	MAND_911	1.06667e-05	1e-05	0.933921	0.066058		MAND_911	1e-05	0.933111	0.0668788		MAND_911	0.00444689	0.995553
African	MAND_915	1e-05	1e-05	0.932996	0.0669636	1e-05	1e-05			MAND_915	1e-05	1e-05	0.934569	1e-05	0.065401		915	MAND_915	1e-05	1e-05	0.934511	0.0654692		MAND_915	1e-05	0.933764	0.0662264		MAND_915	0.005937	0.994063
African	MAND_1283	1.06667e-05	1e-05	0.936993	0.0622474	0.000727889	1.07778e-05			MAND_1283	1e-05	1e-05	0.937496	0.000449333	0.0620346		1283	MAND_1283	1e-05	1e-05	0.937547	0.0624328		MAND_1283	1e-05	0.936798	0.0631918		MAND_1283	0.007382	0.992618
African	MAND_917	0.005081	1e-05	0.937503	0.0573858	1e-05	1e-05			MAND_917	0.00495278	1e-05	0.938354	1e-05	0.0566729		917	MAND_917	0.00386278	1e-05	0.938501	0.0576263		MAND_917	0.00276144	0.938007	0.0592319		MAND_917	0.0100712	0.989929
African	MAND_906	1e-05	1e-05	0.939548	0.0604118	1e-05	1e-05			MAND_906	1e-05	1e-05	0.940519	1e-05	0.0594507		906	MAND_906	1e-05	1e-05	0.940505	0.0594753		MAND_906	1e-05	0.939864	0.0601256		MAND_906	0.007899	0.992101
African	MAND_905	1e-05	1e-05	0.940201	0.051001	0.008767	1.18889e-05			MAND_905	1e-05	1e-05	0.94038	0.00831189	0.0512883		905	MAND_905	1e-05	1e-05	0.942495	0.0574846		MAND_905	1e-05	0.941758	0.0582317		MAND_905	0.00721622	0.992784
African	MAND_914	1e-05	1e-05	0.942915	0.0520784	0.004977	1e-05			MAND_914	1e-05	1e-05	0.943859	0.00511611	0.0510049		914	MAND_914	1e-05	1e-05	0.945197	0.0547828		MAND_914	1e-05	0.944592	0.0553981		MAND_914	0.00690222	0.993098
African	MAND_1286	1e-05	1e-05	0.943722	0.0545626	0.00168544	1e-05			MAND_1286	1e-05	1e-05	0.945224	0.00186778	0.0528881		1286	MAND_1286	1e-05	1e-05	0.945644	0.0543358		MAND_1286	1e-05	0.944953	0.055037		MAND_1286	0.00262278	0.997377
African	MAND_910	1.1e-05	1e-05	0.944342	0.0556169	1e-05	1e-05			MAND_910	1e-05	1e-05	0.94551	1e-05	0.0544597		910	MAND_910	1.06667e-05	1e-05	0.945433	0.0545464		MAND_910	1e-05	0.944677	0.0553131		MAND_910	0.005993	0.994007
African	MAND_1285	1e-05	1e-05	0.947575	0.0523846	1e-05	1e-05			MAND_1285	1e-05	1e-05	0.948394	1e-05	0.0515761		1285	MAND_1285	1e-05	1e-05	0.94837	0.0516097		MAND_1285	1e-05	0.947605	0.0523854		MAND_1285	1e-05	0.99999
African	MAND_913	0.00158822	1e-05	0.949382	0.0490003	1e-05	1e-05			MAND_913	0.00164378	1e-05	0.949987	1e-05	0.0483493		913	MAND_913	0.000621444	1e-05	0.950125	0.0492439		MAND_913	1e-05	0.949313	0.0506766		MAND_913	0.00510411	0.994896
African	MAND_1202	0.00140478	1e-05	0.949616	0.0468293	0.00212922	1e-05			MAND_1202	0.00119044	1e-05	0.95037	0.00228722	0.0461419		1202	MAND_1202	0.00204044	1e-05	0.950787	0.0471626		MAND_1202	0.000167556	0.950407	0.0494258		MAND_1202	0.00637278	0.993627
African	MAND_1200	1e-05	5.24444e-05	0.94966	0.0498967	0.000370556	1e-05			MAND_1200	1e-05	0.000119111	0.950573	0.000442444	0.0488556		1200	MAND_1200	1e-05	0.000251667	0.950625	0.0491129		MAND_1200	1e-05	0.950021	0.0499691		MAND_1200	0.00472044	0.99528
African	MAND_909	1e-05	1e-05	0.950141	0.0491577	0.000671556	1e-05			MAND_909	1e-05	1e-05	0.951011	0.000751222	0.048218		909	MAND_909	1.01111e-05	1e-05	0.951152	0.0488273		MAND_909	1e-05	0.950446	0.0495443		MAND_909	0.00248244	0.997518
African	MAND_1199	0.000843667	1e-05	0.951297	0.0467878	0.00105178	1e-05			MAND_1199	0.000901778	1e-05	0.951841	0.00103122	0.0462163		1199	MAND_1199	0.000894556	1e-05	0.952071	0.0470242		MAND_1199	1e-05	0.951321	0.048669		MAND_1199	0.00890522	0.991095
African	MAND_907	1e-05	1e-05	0.951347	0.048613	1e-05	1e-05			MAND_907	1e-05	1e-05	0.951897	1e-05	0.0480729		907	MAND_907	1e-05	1e-05	0.951844	0.0481359		MAND_907	1e-05	0.951108	0.0488817		MAND_907	1e-05	0.99999
African	MAND_904	1.07778e-05	1e-05	0.951551	0.0459548	0.00246389	1e-05			MAND_904	1e-05	1e-05	0.952135	0.002438	0.0454071		904	MAND_904	1.15556e-05	1e-05	0.952719	0.0472591		MAND_904	1e-05	0.951775	0.0482154		MAND_904	0.00358956	0.99641
African	MAND_912	0.00155933	1e-05	0.952009	0.0460399	8.73333e-05	0.000294333			MAND_912	0.00135878	1e-05	0.952275	7.31111e-05	0.0462826		912	MAND_912	0.000736667	1e-05	0.952335	0.0469189		MAND_912	1e-05	0.951471	0.0485187		MAND_912	0.00400644	0.995994
African	MAND_1284	1.04444e-05	1e-05	0.952956	0.0444426	0.00257078	1e-05			MAND_1284	1e-05	1e-05	0.953585	0.00273767	0.0436571		1284	MAND_1284	1e-05	1e-05	0.954283	0.0456974		MAND_1284	1e-05	0.953686	0.0463038		MAND_1284	0.00266567	0.997334
African	MAND_908	1e-05	1e-05	0.953918	0.0429608	0.00302367	7.78889e-05			MAND_908	1e-05	1e-05	0.954185	0.00297078	0.0428249		908	MAND_908	1.17778e-05	1e-05	0.954872	0.0451062		MAND_908	1e-05	0.954057	0.0459332		MAND_908	0.00409289	0.995907
African	MAND_1201	1e-05	1e-05	0.954559	0.0440562	0.00135511	1e-05			MAND_1201	1.04444e-05	1e-05	0.95544	0.00151844	0.0430211		1201	MAND_1201	1.08889e-05	1e-05	0.955761	0.0442182		MAND_1201	1e-05	0.954938	0.0450519		MAND_1201	0.00191367	0.998086
African	SAN_992	1e-05	0.000655667	0.974233	0.0225659	0.002523	1.23333e-05			SAN_992	1e-05	0.000584222	0.974542	0.00272422	0.0221391		992	SAN_992	1e-05	0.00122256	0.975211	0.0235568		SAN_992	0.000554778	0.975074	0.0243711		SAN_992	1e-05	0.99999
African	SAN_1036	1e-05	1e-05	0.975244	0.011636	0.00234433	0.0107559			SAN_1036	1e-05	1e-05	0.975926	0.00367122	0.0203836		1036	SAN_1036	1e-05	1e-05	0.976879	0.0231012		SAN_1036	1e-05	0.976676	0.0233144		SAN_1036	1e-05	0.99999
African	SAN_991	1.06667e-05	1e-05	0.97706	0.00679589	0.00133622	0.0147869			SAN_991	1e-05	1e-05	0.97774	0.00337389	0.018866		991	SAN_991	0.000648444	1e-05	0.978699	0.0206429		SAN_991	1e-05	0.978508	0.0214817		SAN_991	1e-05	0.99999
African	SAN_1032	1e-05	1e-05	0.978502	0.0160464	0.002931	0.002501			SAN_1032	1e-05	1e-05	0.979002	0.00355878	0.0174196		1032	SAN_1032	1.16667e-05	1e-05	0.980074	0.0199048		SAN_1032	1e-05	0.979772	0.0202184		SAN_1032	1e-05	0.99999
African	SAN_1029	1e-05	1e-05	0.980129	0.00839878	0.00562478	0.00582756			SAN_1029	1e-05	1e-05	0.980861	0.00687544	0.0122437		1029	SAN_1029	0.000777333	1e-05	0.982443	0.0167699		SAN_1029	1e-05	0.982275	0.0177147		SAN_1029	1e-05	0.99999
African	KENYA_1415	0.0167473	1e-05	0.839088	0.132034	0.0121103	1e-05			KENYA_1415	0.0145761	1e-05	0.838981	0.0116502	0.134783		1415	KENYA_1415	0.0212004	1e-05	0.840473	0.138316		KENYA_1415	0.0186589	0.840225	0.141116		KENYA_1415	0.0400738	0.959926
African	KENYA_1416	0.00646478	1e-05	0.84212	0.124503	0.00532178	0.0215806			KENYA_1416	0.00680444	1e-05	0.841893	0.005674	0.145618		1416	KENYA_1416	0.00975978	1e-05	0.842573	0.147657		KENYA_1416	0.00510656	0.842246	0.152647		KENYA_1416	0.028616	0.971384
African	KENYA_1411	0.0167583	1e-05	0.882361	0.096302	0.004558	1e-05			KENYA_1411	0.0148749	1e-05	0.882389	0.00447522	0.098251		1411	KENYA_1411	0.0171524	1e-05	0.882972	0.0998654		KENYA_1411	0.0150652	0.882658	0.102276		KENYA_1411	0.0286514	0.971349
African	KENYA_1408	1e-05	0.003957	0.924155	0.0520813	0.00687744	0.0129192			KENYA_1408	1e-05	0.00473744	0.924557	0.00758133	0.0631146		1408	KENYA_1408	0.00290378	0.00545256	0.925849	0.065795		KENYA_1408	0.00779833	0.925041	0.0671599		KENYA_1408	0.0159933	0.984007
African	KENYA_1417	0.00738378	1e-05	0.928511	0.0623268	0.00175856	1e-05			KENYA_1417	0.00622322	1e-05	0.928739	0.00182878	0.0631984		1417	KENYA_1417	0.00665278	1e-05	0.92904	0.064297		KENYA_1417	0.00485733	0.928584	0.0665584		KENYA_1417	0.0168382	0.983162
African	KENYA_1414	0.00725989	1e-05	0.931299	0.0497183	0.00499478	0.00671811			KENYA_1414	0.00729122	1e-05	0.931673	0.00535056	0.0556753		1414	KENYA_1414	0.0101393	1e-05	0.932414	0.0574363		KENYA_1414	0.00895544	0.931966	0.0590789		KENYA_1414	0.0165626	0.983437
African	KENYA_1406	1e-05	0.001007	0.93215	0.054033	0.00596433	0.00683522			KENYA_1406	1e-05	0.000943222	0.932671	0.00638889	0.0599877		1406	KENYA_1406	1e-05	0.00264333	0.934108	0.0632384		KENYA_1406	0.00127478	0.933673	0.0650523		KENYA_1406	0.011685	0.988315
African	KENYA_1418	0.004946	1e-05	0.933344	0.0586333	0.00305578	1.03333e-05			KENYA_1418	0.00488178	1e-05	0.934464	0.00310344	0.0575409		1418	KENYA_1418	0.00614344	1e-05	0.934944	0.0589026		KENYA_1418	0.00367733	0.934562	0.061761		KENYA_1418	0.0133808	0.986619
African	KENYA_1419	0.00400533	1e-05	0.93682	0.0566939	1e-05	0.00246122			KENYA_1419	0.00351522	1e-05	0.937208	1e-05	0.0592571		1419	KENYA_1419	0.00290889	1e-05	0.93726	0.0598211		KENYA_1419	0.00126811	0.936822	0.0619097		KENYA_1419	0.0106227	0.989377
African	KENYA_1412	0.00554011	1e-05	0.938525	0.0492314	0.00321744	0.00347611			KENYA_1412	0.00551122	1e-05	0.939033	0.00341322	0.0520328		1412	KENYA_1412	0.00699267	2.24444e-05	0.939573	0.0534126		KENYA_1412	0.006275	0.939052	0.0546727		KENYA_1412	0.015119	0.984881
African	KENYA_1405	1.01111e-05	1e-05	0.941797	0.0561323	0.00204078	1e-05			KENYA_1405	1.06667e-05	1e-05	0.942287	0.00163167	0.0560602		1405	KENYA_1405	1.12222e-05	1e-05	0.942658	0.0573203		KENYA_1405	1e-05	0.942035	0.057955		KENYA_1405	0.00740367	0.992596
								1								1							1					1
Kalinago	345	0.004276	1e-05	0.916166	0.07387	0.002594	0.003085			345	0.003334	1e-05	0.916238	0.00248	0.077938		345	69_345	0.004263	1e-05	0.916625	0.079102		69_345	0.003614	0.916035	0.080351		69_345	0.014192	0.985808
Kalinago	48	0.001488	0.007684	0.836257	0.127586	0.00066	0.026325			48	0.002018	0.007739	0.836212	0.001441	0.152591		48	12_48	0.001972	0.008301	0.836327	0.153401		12_48	0.00934	0.835395	0.155265		12_48	0.034152	0.965848
Kalinago	362	0.007172	0.018889	0.685562	0.251926	1e-05	0.03644			362	0.006726	0.018045	0.684966	1e-05	0.290253		362	24_362	0.00401	0.019913	0.68494	0.291136		24_362	0.022738	0.68337	0.293892		24_362	0.072154	0.927846
Kalinago	89	1e-05	0.064144	0.688241	0.205924	0.002894	0.038786			89	1e-05	0.064178	0.687713	0.003656	0.244443		89	20_89	1e-05	0.065268	0.688203	0.246519		20_89	0.06405	0.684905	0.251045		20_89	0.098876	0.901124
Kalinago	135	0.01779	0.093465	0.473174	0.276938	0.009207	0.129425			135	0.02598	0.096856	0.473398	0.013523	0.390242		135	27_135	0.03337	0.097374	0.474715	0.394541		27_135	0.128932	0.471231	0.399837		27_135	0.200945	0.799055
Kalinago	461	0.007905	0.110512	0.802636	0.069556	0.000568	0.008822			461	0.008071	0.110391	0.802795	0.000762	0.077981		461	94_461	0.007612	0.110833	0.802978	0.078577		94_461	0.118996	0.797218	0.083786		94_461	0.118224	0.881776
Kalinago	214	1e-05	0.113449	0.598189	0.228516	0.003159	0.056677			214	1e-05	0.114668	0.598026	0.004744	0.282552		214	114_214	1e-05	0.116148	0.598728	0.285115		114_214	0.116	0.593341	0.29066		114_214	0.159468	0.840532
Kalinago	211	1e-05	0.123171	0.526461	0.295508	1e-05	0.05484			211	1e-05	0.123123	0.525495	1e-05	0.351362		211	40_211	1e-05	0.123336	0.52499	0.351664		40_211	0.113502	0.522054	0.364444		40_211	0.174119	0.825881
Kalinago	132	1e-05	0.123516	0.74197	0.109885	0.005784	0.018835			132	1e-05	0.123596	0.741945	0.006137	0.128312		132	51_132	1e-05	0.125341	0.743196	0.131453		51_132	0.126025	0.736905	0.137071		51_132	0.134238	0.865762
Kalinago	218	0.007179	0.131925	0.716423	0.130044	1e-05	0.014419			218	0.006587	0.131359	0.715976	1e-05	0.146068		218	118_218	0.004889	0.132411	0.716078	0.146622		118_218	0.137971	0.70952	0.152509		118_218	0.15004	0.84996
Kalinago	54	0.000877	0.17881	0.639786	0.138375	0.000684	0.041468			54	0.002793	0.179621	0.639805	0.001976	0.175804		54	24_54	0.002707	0.180363	0.640092	0.176838		24_54	0.181773	0.633007	0.18522		24_54	0.201223	0.798777
Kalinago	221	0.014781	0.180425	0.645587	0.148602	1e-05	0.010594			221	0.013317	0.179533	0.64505	1e-05	0.16209		221	121_221	0.011573	0.180702	0.645143	0.162582		121_221	0.192704	0.63724	0.170056		121_221	0.204719	0.795281
Kalinago	356	0.004285	0.184252	0.295776	0.437861	1e-05	0.077816			356	0.004834	0.183388	0.29406	1e-05	0.517709		356	23_356	0.002734	0.185033	0.293648	0.518585		23_356	0.183815	0.288055	0.52813		23_356	0.287813	0.712187
Kalinago	227	0.013681	0.189682	0.666925	0.125523	0.004179	1e-05			227	0.012205	0.188545	0.666892	0.003277	0.12908		227	126_227	0.013095	0.189186	0.66739	0.130329		126_227	0.202678	0.659647	0.137676		126_227	0.209879	0.790121
Kalinago	341	0.002568	0.189702	0.583041	0.170845	0.002039	0.051805			341	0.005104	0.190532	0.582917	0.003261	0.218186		341	184_341	0.006113	0.191163	0.58323	0.219494		184_341	0.196073	0.575753	0.228174		184_341	0.225506	0.774494
Kalinago	433	1e-05	0.191099	0.409056	0.323152	1e-05	0.076672			433	1e-05	0.192426	0.408474	0.001345	0.397744		433	86_433	1e-05	0.193163	0.408222	0.398604		86_433	0.189256	0.402057	0.408687		86_433	0.261752	0.738248
Kalinago	326	1e-05	0.194906	0.467561	0.284115	1e-05	0.053399			326	1e-05	0.194952	0.466832	1e-05	0.338197		326	175_326	1e-05	0.19537	0.466383	0.338237		175_326	0.190548	0.460329	0.349123		175_326	0.250416	0.749584
Kalinago	83	1e-05	0.201768	0.621455	0.135058	0.007675	0.034034			83	1e-05	0.202708	0.621416	0.008645	0.16722		83	43_83	1e-05	0.205148	0.62318	0.171662		43_83	0.204348	0.614479	0.181174		43_83	0.222182	0.777818
Kalinago	31	1e-05	0.208548	0.576289	0.175613	1e-05	0.039529			31	1e-05	0.209447	0.576233	1e-05	0.2143		31	6_31	1e-05	0.209771	0.576032	0.214186		6_31	0.207202	0.568846	0.223952		6_31	0.234559	0.765441
Kalinago	204	0.00399	0.211226	0.618722	0.103911	0.006895	0.055256			204	0.008084	0.213054	0.619186	0.009015	0.150661		204	38_204	0.012868	0.213441	0.620312	0.15338		38_204	0.224808	0.612087	0.163104		38_204	0.238218	0.761782
Kalinago	208	0.009143	0.22339	0.473924	0.236833	1e-05	0.0567			208	0.011424	0.223759	0.473381	1e-05	0.291425		208	113_208	0.009698	0.224909	0.473278	0.292115		113_208	0.233544	0.464878	0.301578		113_208	0.28295	0.71705
Kalinago	209	0.002841	0.226968	0.619084	0.143133	1e-05	0.007964			209	0.001328	0.225872	0.618365	1e-05	0.154425		209	301_209	1e-05	0.226736	0.618458	0.154796		301_209	0.224056	0.609059	0.166885		301_209	0.238587	0.761413
Kalinago	130	0.010844	0.231469	0.574773	0.15908	0.003724	0.02011			130	0.010398	0.230854	0.574122	0.003756	0.18087		130	49_130	0.011704	0.231389	0.574605	0.182303		49_130	0.242458	0.565706	0.191837		49_130	0.262982	0.737018
Kalinago	60	1e-05	0.233345	0.53677	0.198362	1e-05	0.031503			60	1e-05	0.232757	0.536013	1e-05	0.23121		60	15_60	1e-05	0.233061	0.535797	0.231132		15_60	0.229062	0.527891	0.243046		15_60	0.262195	0.737805
Kalinago	443	1e-05	0.247213	0.579603	0.167085	0.002367	0.003722			443	1e-05	0.244679	0.578569	0.000945	0.175796		443	88_443	1e-05	0.244949	0.578685	0.176356		88_443	0.235841	0.570735	0.193424		88_443	0.253024	0.746976
Kalinago	1	1e-05	0.254008	0.395984	0.308663	0.000147	0.041189			1	1e-05	0.252206	0.394355	1e-05	0.353419		1	1_1	1e-05	0.252479	0.393923	0.353588		1_1	0.248188	0.386624	0.365189		1_1	0.313694	0.686306
Kalinago	325	1e-05	0.255302	0.521279	0.198679	0.00701	0.01772			325	1e-05	0.253683	0.520452	0.006006	0.21985		325	84_325	0.001173	0.254923	0.521393	0.222511		84_325	0.254712	0.512112	0.233176		84_325	0.283518	0.716482
Kalinago	151	0.013401	0.255588	0.545922	0.164435	1e-05	0.020644			151	0.01293	0.25486	0.545263	1e-05	0.186937		151	55_151	0.011692	0.255702	0.545254	0.187352		55_151	0.266169	0.535641	0.19819		55_151	0.287152	0.712848
Kalinago	120	0.02348	0.256397	0.544521	0.155393	0.009828	0.010382			120	0.022078	0.255442	0.543908	0.009372	0.169199		120	67_120	0.027065	0.255892	0.545139	0.171904		67_120	0.28129	0.536027	0.182683		67_120	0.298796	0.701204
Kalinago	444	1e-05	0.261341	0.537669	0.161862	0.005423	0.033694			444	1e-05	0.261819	0.537507	0.005965	0.194698		444	29_444	0.002314	0.262434	0.538333	0.196918		29_444	0.263429	0.528704	0.207867		29_444	0.287527	0.712473
Kalinago	96	0.010557	0.265319	0.575464	0.13932	0.005092	0.004248			96	0.008778	0.264161	0.574811	0.004457	0.147792		96	47_96	0.010328	0.264911	0.575482	0.14928		47_96	0.273701	0.565557	0.160741		47_96	0.285534	0.714466
Kalinago	286	1e-05	0.271005	0.640759	0.070474	0.001051	0.016701			286	0.000833	0.271343	0.640864	0.001621	0.08534		286	156_286	0.000617	0.271964	0.641295	0.086124		156_286	0.271961	0.629626	0.098413		156_286	0.268064	0.731936
Kalinago	449	0.010809	0.271488	0.603425	0.105892	0.000406	0.00798			449	0.009968	0.27081	0.603092	0.000222	0.115908		449	90_449	0.008862	0.271461	0.603264	0.116413		90_449	0.277499	0.593406	0.129095		90_449	0.28211	0.71789
Kalinago	229	0.031681	0.271656	0.576187	0.105432	0.003568	0.011475			229	0.031568	0.27116	0.575879	0.00344	0.117953		229	128_229	0.032645	0.271833	0.576374	0.119147		128_229	0.302456	0.566757	0.130787		128_229	0.304881	0.695119
Kalinago	12	1e-05	0.273754	0.617581	0.107389	0.001256	1e-05			12	1e-05	0.272522	0.61735	0.000119	0.109999		12	32_12	1e-05	0.272642	0.61739	0.109957		32_12	0.268536	0.606966	0.124497		32_12	0.270734	0.729266
Kalinago	293	0.000141	0.277451	0.476083	0.220717	1e-05	0.025599			293	1e-05	0.275694	0.474913	1e-05	0.249372		293	162_293	1e-05	0.276235	0.474743	0.249012		162_293	0.274172	0.465001	0.260827		162_293	0.308029	0.691971
Kalinago	333	0.030662	0.278668	0.516286	0.140756	0.007361	0.026268			333	0.031232	0.278565	0.515935	0.00757	0.166697		333	180_333	0.034817	0.279207	0.516925	0.16905		180_333	0.312381	0.506875	0.180744		180_333	0.329668	0.670332
Kalinago	264	0.013314	0.284994	0.57457	0.119823	0.005264	0.002034			264	0.011748	0.284032	0.574155	0.004479	0.125586		264	145_264	0.013223	0.284745	0.574913	0.127119		145_264	0.297061	0.563902	0.139038		145_264	0.300387	0.699613
Kalinago	447	0.007296	0.285228	0.602513	0.101629	1e-05	0.003324			447	0.006003	0.284398	0.602224	1e-05	0.107364		447	89_447	0.004281	0.285439	0.602448	0.107832		89_447	0.287143	0.591	0.121857		89_447	0.289097	0.710903
Kalinago	175	0.00621	0.285332	0.527213	0.145594	1e-05	0.03564			175	0.007995	0.285711	0.527172	1e-05	0.179112		175	98_175	0.006649	0.28653	0.52723	0.17959		98_175	0.290882	0.517318	0.191801		98_175	0.309854	0.690146
Kalinago	258	1e-05	0.286375	0.58896	0.118767	1e-05	0.005878			258	1e-05	0.284694	0.588142	1e-05	0.127143		258	73_258	1e-05	0.284914	0.588094	0.126981		73_258	0.280923	0.578479	0.140598		73_258	0.287696	0.712304
Kalinago	115	1e-05	0.286833	0.6095	0.085188	1e-05	0.018459			115	1e-05	0.287327	0.609473	1e-05	0.103179		115	63_115	1e-05	0.287513	0.609472	0.103005		63_115	0.278209	0.600746	0.121045		63_115	0.280518	0.719482
Kalinago	140	0.037366	0.293058	0.458626	0.175175	0.010882	0.024893			140	0.037029	0.29245	0.457987	0.010888	0.201645		140	77_140	0.042744	0.293122	0.459291	0.204844		77_140	0.332939	0.449928	0.217133		77_140	0.359895	0.640105
Kalinago	320	1e-05	0.29391	0.566973	0.122904	0.005234	0.010969			320	1e-05	0.292858	0.566493	0.004892	0.135746		320	172_320	1e-05	0.294246	0.56749	0.138253		172_320	0.291612	0.556909	0.151479		172_320	0.30071	0.69929
Kalinago	212	0.027566	0.299101	0.544397	0.120481	0.001194	0.007262			212	0.026634	0.298267	0.54386	0.000525	0.130714		212	63_212	0.025777	0.299135	0.54404	0.131048		63_212	0.321211	0.534169	0.14462		63_212	0.328845	0.671155
Kalinago	335	1e-05	0.29966	0.578828	0.109112	1e-05	0.01238			335	1e-05	0.298968	0.578427	1e-05	0.122586		335	181_335	1e-05	0.299076	0.578404	0.12251		181_335	0.29273	0.568511	0.13876		181_335	0.297738	0.702262
Kalinago	90	1e-05	0.301701	0.515698	0.165104	0.00586	0.011627			90	1e-05	0.300044	0.514784	0.004869	0.180293		90	21_90	1e-05	0.301354	0.515748	0.182887		21_90	0.294591	0.506102	0.199307		21_90	0.312407	0.687593
Kalinago	234	1e-05	0.303288	0.57373	0.118554	0.004409	1e-05			234	1e-05	0.301596	0.573262	0.003174	0.121959		234	130_234	1e-05	0.302541	0.573934	0.123516		130_234	0.29899	0.562994	0.138017		130_234	0.305254	0.694746
Kalinago	445	1e-05	0.305175	0.399354	0.253373	0.006623	0.035465			445	1e-05	0.303921	0.398139	0.006277	0.291653		445	30_445	1e-05	0.305818	0.399208	0.294965		30_445	0.301651	0.388978	0.309371		30_445	0.354446	0.645554
Kalinago	63	0.011641	0.308051	0.573662	0.104786	1e-05	0.001851			63	0.010136	0.307172	0.573257	1e-05	0.109425		63	30_63	0.008674	0.308094	0.573451	0.109782		30_63	0.314822	0.561748	0.12343		30_63	0.314809	0.685191
Kalinago	437	0.005056	0.308804	0.528021	0.147258	0.001548	0.009313			437	0.003714	0.307839	0.527505	0.000824	0.160119		437	244_437	0.002768	0.308669	0.527719	0.160844		244_437	0.308943	0.517043	0.174014		244_437	0.324246	0.675754
Kalinago	97	1e-05	0.310935	0.436797	0.217087	0.002838	0.032333			97	1e-05	0.310115	0.435954	0.002717	0.251204		97	48_97	1e-05	0.311084	0.436285	0.25262		48_97	0.306975	0.426158	0.266866		48_97	0.345152	0.654848
Kalinago	95	1e-05	0.320456	0.453176	0.195082	1e-05	0.031266			95	1e-05	0.319862	0.452305	1e-05	0.227813		95	46_95	1e-05	0.320129	0.452133	0.227728		46_95	0.308533	0.44326	0.248206		46_95	0.344637	0.655363
Kalinago	317	1e-05	0.321766	0.577861	0.081479	0.003893	0.01499			317	1e-05	0.321992	0.577867	0.004284	0.095847		317	63_317	0.000199	0.323119	0.578843	0.09784		63_317	0.319668	0.566729	0.113604		63_317	0.318193	0.681807
Kalinago	411	1e-05	0.325928	0.525832	0.121502	0.008172	0.018555			411	1e-05	0.3255	0.525314	0.008472	0.140704		411	83_411	1e-05	0.327754	0.527082	0.145154		83_411	0.321263	0.516912	0.161825		83_411	0.332573	0.667427
Kalinago	17	0.01427	0.328329	0.460834	0.17129	1e-05	0.025266			17	0.013911	0.327834	0.460187	1e-05	0.198058		17	259_17	0.011115	0.329735	0.460408	0.198742		259_17	0.336825	0.449972	0.213204		259_17	0.362635	0.637365
Kalinago	434	0.003478	0.328803	0.41708	0.207745	0.004536	0.038359			434	0.003886	0.328551	0.41638	0.004888	0.246294		434	241_434	0.005874	0.329207	0.416909	0.24801		241_434	0.329208	0.407025	0.263767		241_434	0.369493	0.630507
Kalinago	88	1e-05	0.329094	0.486179	0.154848	0.010281	0.019589			88	1e-05	0.328285	0.485452	0.009892	0.176361		88	44_88	1e-05	0.331002	0.48752	0.181469		44_88	0.326916	0.476493	0.196591		44_88	0.347196	0.652804
Kalinago	267	0.004232	0.329377	0.515803	0.135652	1e-05	0.014926			267	0.003582	0.328733	0.51536	1e-05	0.152315		267	46_267	0.001906	0.329768	0.515539	0.152788		46_267	0.330183	0.503782	0.166035		46_267	0.342964	0.657036
Kalinago	344	0.013911	0.337298	0.352458	0.254996	0.00253	0.038806			344	0.013388	0.336624	0.351509	0.002557	0.295923		344	185_344	0.01361	0.337534	0.351751	0.297106		185_344	0.349233	0.341144	0.309622		185_344	0.397939	0.602061
Kalinago	340	1e-05	0.343872	0.483359	0.157211	0.000818	0.014728			340	1e-05	0.342576	0.482575	0.000113	0.174726		340	20_340	1e-05	0.342635	0.482497	0.174858		20_340	0.336592	0.471727	0.191681		20_340	0.353172	0.646828
Kalinago	9	1e-05	0.347875	0.512202	0.132656	0.007247	1e-05			9	1e-05	0.34613	0.511767	0.005895	0.136197		9	2_9	1e-05	0.347722	0.51307	0.139198		2_9	0.340924	0.502449	0.156627		2_9	0.350606	0.649394
Kalinago	41	0.000181	0.350594	0.581718	0.057058	0.010438	1e-05			41	1.3e-05	0.350466	0.58218	0.010157	0.057184		41	20_41	0.005436	0.350767	0.583722	0.060075		20_41	0.351459	0.570995	0.077546		20_41	0.342011	0.657989
Kalinago	343	0.000421	0.357163	0.498281	0.133898	0.002584	0.007652			343	1e-05	0.355895	0.497612	0.001982	0.144501		343	68_343	1e-05	0.356538	0.498003	0.14545		68_343	0.354721	0.486101	0.159179		68_343	0.366228	0.633772
Kalinago	179	0.004574	0.361559	0.508521	0.114832	1e-05	0.010503			179	0.003599	0.360988	0.507987	1e-05	0.127416		179	295_179	0.001648	0.362177	0.508214	0.127962		295_179	0.362207	0.495689	0.142104		295_179	0.370522	0.629478
Kalinago	452	0.023302	0.362778	0.415222	0.119227	0.007129	0.072342			452	0.028774	0.365215	0.415632	0.009872	0.180507		452	251_452	0.03372	0.365865	0.416894	0.183522		251_452	0.39729	0.404957	0.197753		251_452	0.421338	0.578662
Kalinago	330	0.003216	0.36465	0.380313	0.213154	1e-05	0.038658			330	0.003733	0.36437	0.379619	0.000132	0.252146		330	178_330	0.002303	0.365284	0.379596	0.252817		178_330	0.364727	0.368347	0.266926		178_330	0.404865	0.595135
Kalinago	50	0.007556	0.36755	0.532225	0.092528	1e-05	0.000131			50	0.006091	0.366622	0.531786	1e-05	0.095491		50	38_50	0.004571	0.367464	0.532074	0.095891		38_50	0.36796	0.520236	0.111804		38_50	0.366012	0.633988
Kalinago	332	1e-05	0.367583	0.469545	0.162842	1e-05	1e-05			332	1e-05	0.364481	0.468215	1e-05	0.167284		332	179_332	1e-05	0.364678	0.468122	0.167189		179_332	0.35194	0.459032	0.189028		179_332	0.370987	0.629013
Kalinago	290	0.113591	0.369318	0.105426	0.029543	0.034411	0.347711			290	0.149692	0.385736	0.109364	0.052099	0.303108		290	159_290	0.183291	0.385253	0.114904	0.316552		159_290	0.563756	0.108007	0.328237		159_290	0.636939	0.363061
Kalinago	439	0.006143	0.37001	0.46201	0.115307	0.001182	0.045349			439	0.008876	0.37124	0.46208	0.002511	0.155292		439	245_439	0.009025	0.372089	0.462517	0.156369		245_439	0.380293	0.449374	0.170333		245_439	0.391813	0.608187
Kalinago	225	0.01321	0.370205	0.399254	0.193235	0.004454	0.019641			225	0.01214	0.369179	0.398389	0.003747	0.216544		225	13_225	0.013262	0.369917	0.398866	0.217956		13_225	0.380411	0.387151	0.232438		13_225	0.411126	0.588874
Kalinago	310	0.010905	0.371167	0.564059	0.053849	1e-05	1e-05			310	0.010924	0.371172	0.564738	1e-05	0.053156		310	61_310	0.00914	0.372268	0.565061	0.053531		61_310	0.378705	0.550887	0.070408		61_310	0.366299	0.633701
Kalinago	226	0.013815	0.371259	0.506035	0.103794	1e-05	0.005087			226	0.012633	0.370499	0.505472	1e-05	0.111386		226	125_226	0.011347	0.3714	0.505681	0.111573		125_226	0.380708	0.492712	0.12658		125_226	0.382954	0.617046
Kalinago	382	0.007794	0.372591	0.503952	0.112459	0.000714	0.002489			382	0.006285	0.371659	0.503493	0.00018	0.118382		382	78_382	0.004909	0.372567	0.503714	0.11881		78_382	0.375332	0.491501	0.133167		78_382	0.379383	0.620617
Kalinago	297	0.010203	0.3753	0.47796	0.131866	0.003082	0.00159			297	0.008388	0.374026	0.47738	0.002292	0.137914		297	54_297	0.008519	0.374779	0.477805	0.138897		54_297	0.379982	0.465248	0.15477		54_297	0.390923	0.609077
Kalinago	363	1e-05	0.375429	0.482336	0.124892	0.00571	0.011624			363	1e-05	0.374437	0.481766	0.005112	0.138676		363	196_363	1e-05	0.375916	0.482787	0.141287		196_363	0.371122	0.470114	0.158763		196_363	0.381079	0.618921
Kalinago	222	0.001718	0.376207	0.45568	0.140097	0.000683	0.025616			222	0.002208	0.376032	0.455257	0.000823	0.16568		222	122_222	0.001603	0.376656	0.455477	0.166264		122_222	0.373519	0.443585	0.182896		122_222	0.391935	0.608065
Kalinago	263	1e-05	0.376874	0.490071	0.118599	0.001503	0.012944			263	1e-05	0.37607	0.489651	0.001255	0.133015		263	16_263	1e-05	0.376506	0.489905	0.133579		16_263	0.371556	0.476998	0.151446		16_263	0.378653	0.621347
Kalinago	321	1e-05	0.377076	0.471324	0.14622	0.00536	1e-05			321	1e-05	0.374767	0.470465	0.003776	0.150982		321	83_321	1e-05	0.375904	0.471208	0.152878		83_321	0.371183	0.459384	0.169433		83_321	0.384846	0.615154
Kalinago	394	0.020018	0.378662	0.489733	0.107633	0.003944	1e-05			394	0.018711	0.377615	0.489286	0.003148	0.11124		394	94_394	0.019664	0.378267	0.489853	0.112216		94_394	0.394775	0.477483	0.127742		94_394	0.396437	0.603563
Kalinago	295	1e-05	0.380652	0.477567	0.11685	1e-05	0.024912			295	1e-05	0.381193	0.477352	1e-05	0.141436		295	164_295	1e-05	0.381359	0.477365	0.141266		164_295	0.372881	0.466772	0.160347		164_295	0.38332	0.61668
Kalinago	417	0.000718	0.381171	0.363212	0.210984	0.002393	0.041523			417	0.00136	0.381009	0.362454	0.002654	0.252522		417	227_417	0.001708	0.381896	0.362742	0.253653		227_417	0.38082	0.350968	0.268212		227_417	0.42349	0.57651
Kalinago	128	0.010164	0.382893	0.466593	0.134313	1e-05	0.006026			128	0.008489	0.381647	0.465591	1e-05	0.144263		128	72_128	0.00589	0.383252	0.465918	0.14494		72_128	0.38691	0.453429	0.159661		72_128	0.398753	0.601247
Kalinago	231	0.005695	0.385022	0.512079	0.080297	1e-05	0.016897			231	0.006414	0.385162	0.512052	1e-05	0.096362		231	14_231	0.004248	0.386497	0.512387	0.096868		14_231	0.385691	0.498291	0.116018		14_231	0.386898	0.613102
Kalinago	337	1e-05	0.386826	0.476497	0.133722	1e-05	0.002936			337	1e-05	0.384514	0.475426	1e-05	0.14004		337	66_337	1e-05	0.384775	0.475377	0.139838		66_337	0.377177	0.463998	0.158825		66_337	0.38854	0.61146
Kalinago	205	0.006602	0.389022	0.479531	0.116607	1e-05	0.008228			205	0.005413	0.3882	0.478986	1e-05	0.12739		205	62_205	0.003874	0.389183	0.479182	0.12776		62_205	0.389859	0.466307	0.143834		62_205	0.396621	0.603379
Kalinago	215	1e-05	0.391196	0.422933	0.180726	0.005125	1e-05			215	1e-05	0.388209	0.421434	0.002964	0.187383		215	115_215	1e-05	0.389033	0.421996	0.188961		115_215	0.374887	0.411533	0.21358		115_215	0.401918	0.598082
Kalinago	301	0.001508	0.391273	0.457908	0.134872	1e-05	0.014428			301	0.000545	0.390714	0.457205	1e-05	0.151527		301	57_301	1e-05	0.391344	0.457273	0.151372		57_301	0.386416	0.445007	0.168577		57_301	0.400568	0.599432
Kalinago	185	1.3e-05	0.391674	0.500652	0.092555	1e-05	0.015097			185	1e-05	0.391694	0.500428	1e-05	0.107859		185	11_185	1e-05	0.392011	0.500488	0.107491		11_185	0.388425	0.486715	0.12486		11_185	0.39137	0.60863
Kalinago	44	1e-05	0.391891	0.539283	0.063856	0.004951	1e-05			44	1e-05	0.392302	0.5406	0.004799	0.062289		44	11_44	1e-05	0.393679	0.541698	0.064614		11_44	0.389327	0.528608	0.082065		11_44	0.380179	0.619821
Kalinago	157	0.008318	0.393004	0.463036	0.130268	1e-05	0.005364			157	0.006472	0.39189	0.462283	1e-05	0.139346		157	87_157	0.004975	0.392823	0.462484	0.139718		87_157	0.39608	0.45014	0.153779		87_157	0.405758	0.594242
Kalinago	367	0.015343	0.398427	0.531069	0.05514	1e-05	1e-05			367	0.014614	0.398089	0.530991	1e-05	0.056297		367	71_367	0.013127	0.398964	0.53125	0.056659		71_367	0.409662	0.516174	0.074165		71_367	0.398052	0.601948
Kalinago	174	0.002607	0.398979	0.353148	0.201268	1e-05	0.043987			174	0.003923	0.399034	0.352532	1e-05	0.244501		174	293_174	0.002454	0.400032	0.352562	0.244953		293_174	0.399447	0.33977	0.260783		293_174	0.439022	0.560978
Kalinago	378	0.007508	0.400419	0.368092	0.206985	1e-05	0.016987			378	0.005226	0.399103	0.366862	1e-05	0.228798		378	202_378	0.002474	0.400892	0.367091	0.229543		202_378	0.400315	0.354381	0.245304		202_378	0.435753	0.564247
Kalinago	289	0.007538	0.401153	0.309041	0.258396	1e-05	0.023861			289	0.005044	0.399471	0.307371	1e-05	0.288105		289	52_289	0.002992	0.400884	0.307369	0.288756		52_289	0.402329	0.295002	0.302668		52_289	0.45183	0.54817
Kalinago	39	1e-05	0.401484	0.315749	0.204751	1e-05	0.077996			39	1e-05	0.405319	0.316119	0.001821	0.276731		39	8_39	1e-05	0.406048	0.316236	0.277707		8_39	0.402036	0.305084	0.29288		8_39	0.454405	0.545595
Kalinago	110	0.007295	0.402559	0.521192	0.068934	1e-05	1e-05			110	0.006268	0.401934	0.520941	1e-05	0.070846		110	59_110	0.003869	0.40332	0.521351	0.071459		59_110	0.405444	0.506636	0.087921		59_110	0.396859	0.603141
Kalinago	463	0.064753	0.406157	0.365761	0.152337	0.004855	0.006137			463	0.062948	0.404801	0.364866	0.004022	0.163363		463	95_463	0.064241	0.405895	0.3653	0.164564		95_463	0.464403	0.353651	0.181946		95_463	0.485649	0.514351
Kalinago	152	0.016632	0.408283	0.433594	0.138882	1e-05	0.002599			152	0.014227	0.407023	0.43264	1e-05	0.146099		152	84_152	0.011464	0.408812	0.432956	0.146769		84_152	0.418293	0.419474	0.162234		84_152	0.431355	0.568645
Kalinago	404	1e-05	0.40953	0.487152	0.103287	1e-05	1e-05			404	1e-05	0.407916	0.486595	1e-05	0.105469		404	218_404	1e-05	0.408493	0.486655	0.104843		218_404	0.400657	0.473893	0.12545		218_404	0.40311	0.59689
Kalinago	324	1e-05	0.41288	0.315103	0.21436	1e-05	0.057637			324	1e-05	0.414749	0.314991	1e-05	0.270239		324	174_324	1e-05	0.415224	0.314777	0.269989		174_324	0.409248	0.30313	0.287622		174_324	0.456673	0.543327
Kalinago	299	0.005282	0.413214	0.427532	0.134619	0.001383	0.017971			299	0.005132	0.412723	0.427024	0.001068	0.154053		299	55_299	0.004519	0.413504	0.427297	0.15468		55_299	0.412673	0.41421	0.173117		55_299	0.428098	0.571902
Kalinago	273	0.002107	0.416031	0.343615	0.190709	1e-05	0.047529			273	0.004074	0.416544	0.343317	1e-05	0.236054		273	150_273	0.002029	0.417763	0.343406	0.236802		150_273	0.416869	0.330297	0.252834		150_273	0.452107	0.547893
Kalinago	202	0.006099	0.416312	0.35629	0.208399	0.005944	0.006956			202	0.003277	0.414526	0.355062	0.004529	0.222606		202	110_202	0.004937	0.415213	0.35568	0.22417		110_202	0.416497	0.343559	0.239944		110_202	0.451286	0.548714
Kalinago	65	0.006814	0.417337	0.503231	0.067742	0.004866	1e-05			65	0.006172	0.416743	0.50305	0.004507	0.069529		65	16_65	0.007522	0.417478	0.50398	0.07102		16_65	0.421192	0.489036	0.089771		16_65	0.413757	0.586243
Kalinago	255	0.003939	0.418634	0.475745	0.099952	1e-05	0.00172			255	0.002193	0.417711	0.475134	1e-05	0.104952		255	45_255	0.000629	0.418558	0.47539	0.105422		45_255	0.415836	0.462936	0.121228		45_255	0.418142	0.581858
Kalinago	379	0.000975	0.419344	0.39818	0.160438	1e-05	0.021054			379	0.000331	0.418758	0.397522	1e-05	0.183379		379	203_379	1e-05	0.419192	0.397465	0.183333		203_379	0.413428	0.385198	0.201375		203_379	0.437375	0.562625
Kalinago	122	1e-05	0.419796	0.369818	0.178431	1e-05	0.031936			122	1e-05	0.419606	0.369184	1e-05	0.21119		122	69_122	1e-05	0.419853	0.369055	0.211081		69_122	0.413473	0.35552	0.231006		69_122	0.447233	0.552767
Kalinago	266	0.066599	0.419972	0.306162	0.063542	0.017166	0.126558			266	0.07899	0.425772	0.307646	0.022871	0.164721		266	147_266	0.092982	0.426031	0.310308	0.170679		147_266	0.513286	0.299425	0.187289		147_266	0.538388	0.461612
Kalinago	403	0.005449	0.420216	0.407695	0.137541	0.001439	0.02766			403	0.006082	0.420232	0.407399	0.001556	0.164732		403	217_403	0.005519	0.421154	0.407721	0.165606		217_403	0.425225	0.393917	0.180859		217_403	0.441122	0.558878
Kalinago	216	1e-05	0.42043	0.419022	0.160518	1e-05	1e-05			216	1e-05	0.417369	0.417556	1e-05	0.165054		216	116_216	1e-05	0.417418	0.417533	0.165039		116_216	0.399618	0.407147	0.193235		116_216	0.420535	0.579465
Kalinago	201	1e-05	0.42314	0.355909	0.191423	1e-05	0.029509			201	1e-05	0.422348	0.354958	1e-05	0.222673		201	109_201	1e-05	0.422659	0.35482	0.222511		109_201	0.417974	0.342767	0.239259		109_201	0.449557	0.550443
Kalinago	80	0.005152	0.425171	0.455212	0.114445	1e-05	1e-05			80	0.003641	0.424493	0.455335	1e-05	0.116521		80	7_80	0.001417	0.425882	0.455616	0.117085		7_80	0.425077	0.441404	0.133519		7_80	0.430512	0.569488
Kalinago	405	1e-05	0.428194	0.430885	0.140273	1e-05	0.000628			405	1e-05	0.425459	0.42971	1e-05	0.14481		405	82_405	1e-05	0.425768	0.429725	0.144496		82_405	0.417066	0.416939	0.165995		82_405	0.430758	0.569242
Kalinago	72	0.000533	0.429064	0.455777	0.094263	0.000954	0.01941			72	0.000957	0.429208	0.455609	0.001478	0.112748		72	35_72	0.000415	0.429986	0.456036	0.113563		35_72	0.426881	0.439941	0.133178		35_72	0.433262	0.566738
Kalinago	440	0.040769	0.429276	0.377364	0.148061	0.00452	1e-05			440	0.038611	0.427863	0.376865	0.003466	0.153196		440	246_440	0.039284	0.428934	0.377387	0.154395		246_440	0.463454	0.365195	0.171351		246_440	0.480424	0.519576
Kalinago	396	0.001085	0.430557	0.431664	0.118245	0.004508	0.013941			396	0.000602	0.430212	0.431182	0.004274	0.13373		396	213_396	0.00189	0.43091	0.431889	0.135311		213_396	0.429063	0.417608	0.153329		213_396	0.440379	0.559621
Kalinago	224	0.002564	0.431386	0.353125	0.179748	0.006314	0.026862			224	0.002509	0.430713	0.352313	0.006131	0.208334		224	124_224	0.005298	0.431318	0.353107	0.210278		124_224	0.432296	0.339791	0.227913		124_224	0.46512	0.53488
Kalinago	165	0.014388	0.43181	0.367866	0.167261	1e-05	0.018666			165	0.013242	0.431017	0.367075	1e-05	0.188656		165	34_165	0.011042	0.432498	0.36732	0.189141		34_165	0.438183	0.354402	0.207415		34_165	0.465783	0.534217
Kalinago	294	1e-05	0.433747	0.323798	0.197084	1e-05	0.045352			294	1e-05	0.434679	0.323471	1e-05	0.241831		294	163_294	1e-05	0.43498	0.323262	0.241748		163_294	0.428668	0.310823	0.260509		163_294	0.47135	0.52865
Kalinago	158	0.008694	0.434823	0.472907	0.077883	1e-05	0.005683			158	0.008115	0.434432	0.472634	1e-05	0.084809		158	88_158	0.006695	0.435333	0.472912	0.08506		88_158	0.441241	0.457693	0.101066		88_158	0.434147	0.565853
Kalinago	164	0.019521	0.436625	0.408486	0.133728	1e-05	0.001631			164	0.016925	0.435338	0.407608	1e-05	0.140119		164	91_164	0.015251	0.436379	0.407769	0.140601		91_164	0.449268	0.393749	0.156983		91_164	0.46259	0.53741
Kalinago	252	0.088862	0.439265	0.313711	0.153695	0.003444	0.001023			252	0.086618	0.437645	0.312926	0.00216	0.160652		252	44_252	0.086598	0.438868	0.313105	0.161429		44_252	0.516796	0.301386	0.181818		44_252	0.540369	0.459631
Kalinago	103	1e-05	0.44085	0.436275	0.100218	1e-05	0.022638			103	1e-05	0.441441	0.436198	1e-05	0.12234		103	53_103	1e-05	0.441759	0.436236	0.121995		53_103	0.435417	0.422927	0.141657		53_103	0.443533	0.556467
Kalinago	98	0.005531	0.440986	0.402008	0.144082	1e-05	0.007384			98	0.00377	0.439735	0.401085	1e-05	0.1554		98	49_98	0.002129	0.440719	0.401289	0.155863		49_98	0.443054	0.386819	0.170127		49_98	0.456575	0.543425
Kalinago	200	0.014976	0.441111	0.451447	0.092447	1e-05	1e-05			200	0.014288	0.440738	0.451944	1e-05	0.093021		200	108_200	0.012679	0.441756	0.452195	0.093369		108_200	0.451342	0.437794	0.110864		108_200	0.450945	0.549055
Kalinago	6	1e-05	0.444036	0.452639	0.103295	1e-05	1e-05			6	1e-05	0.442303	0.451895	1e-05	0.105782		6	4_6	1e-05	0.44265	0.451989	0.105351		4_6	0.43096	0.438125	0.130914		4_6	0.435008	0.564992
Kalinago	182	1e-05	0.445367	0.425413	0.116194	1e-05	0.013005			182	1e-05	0.444531	0.424754	1e-05	0.130694		182	298_182	1e-05	0.444669	0.424789	0.130532		298_182	0.432369	0.4118	0.155831		298_182	0.444545	0.555455
Kalinago	265	0.035912	0.449517	0.396732	0.11326	0.004569	1e-05			265	0.034859	0.448681	0.396695	0.003647	0.116117		265	146_265	0.035858	0.449546	0.397337	0.117259		146_265	0.480564	0.382927	0.136509		146_265	0.486381	0.513619
Kalinago	262	0.041769	0.450359	0.395786	0.105419	0.006657	1e-05			262	0.040422	0.449309	0.395361	0.005985	0.108923		262	144_262	0.042959	0.450094	0.396229	0.110718		144_262	0.486284	0.382868	0.130848		144_262	0.492281	0.507719
Kalinago	199	0.021503	0.451355	0.351625	0.171923	0.001638	0.001957			199	0.018642	0.449548	0.3504	0.000571	0.180839		199	107_199	0.017601	0.450498	0.350552	0.18135		107_199	0.462589	0.336339	0.201072		107_199	0.489521	0.510479
Kalinago	459	0.044336	0.452735	0.39152	0.110238	0.00116	1e-05			459	0.043293	0.451988	0.391676	0.000442	0.112602		459	93_459	0.042109	0.45302	0.391824	0.113047		93_459	0.49128	0.378062	0.130659		93_459	0.496505	0.503495
Kalinago	125	0.025286	0.454592	0.441519	0.078584	1e-05	1e-05			125	0.024005	0.453877	0.441009	1e-05	0.081099		125	26_125	0.022631	0.454835	0.441267	0.081268		26_125	0.474162	0.426151	0.099686		26_125	0.469001	0.530999
Kalinago	100	0.011619	0.455911	0.39368	0.123674	0.001079	0.014037			100	0.011158	0.455245	0.392998	0.00088	0.139719		100	51_100	0.010217	0.456146	0.393286	0.140351		51_100	0.460369	0.380266	0.159366		51_100	0.474861	0.525139
Kalinago	268	0.041188	0.456728	0.409788	0.089068	0.003218	1e-05			268	0.041509	0.456655	0.410954	0.002661	0.088221		268	47_268	0.041869	0.457587	0.411448	0.089096		47_268	0.49463	0.398147	0.107223		47_268	0.493054	0.506946
Kalinago	40	0.010477	0.458146	0.418567	0.099922	1e-05	0.012879			40	0.010287	0.457854	0.4183	1e-05	0.113549		40	9_40	0.008993	0.458682	0.418488	0.113838		9_40	0.464614	0.403052	0.132333		9_40	0.469783	0.530217
Kalinago	441	0.052802	0.45934	0.369792	0.107311	0.009126	0.001628			441	0.051574	0.458282	0.369163	0.008254	0.112727		441	247_441	0.055703	0.459081	0.370324	0.114892		247_441	0.509666	0.356857	0.133478		247_441	0.517149	0.482851
Kalinago	59	0.01071	0.459542	0.341558	0.178272	1e-05	0.009909			59	0.008287	0.458157	0.34033	1e-05	0.193216		59	28_59	0.005656	0.459899	0.340589	0.193856		28_59	0.462608	0.32624	0.211152		28_59	0.487782	0.512218
Kalinago	183	0.002012	0.461109	0.437347	0.093938	1e-05	0.005584			183	0.000886	0.460603	0.436952	1e-05	0.101548		183	299_183	1e-05	0.461243	0.437149	0.101598		299_183	0.457578	0.421966	0.120456		299_183	0.458279	0.541721
Kalinago	73	1e-05	0.461833	0.398288	0.12637	1e-05	0.013489			73	1e-05	0.460717	0.397533	1e-05	0.141729		73	36_73	1e-05	0.461093	0.397534	0.141363		36_73	0.451593	0.383826	0.164582		36_73	0.46727	0.53273
Kalinago	129	0.010336	0.462077	0.407913	0.11853	0.001134	1e-05			129	0.008581	0.461017	0.407427	0.000341	0.122634		129	73_129	0.00748	0.461825	0.407659	0.123037		73_129	0.467202	0.392984	0.139814		73_129	0.471943	0.528057
Kalinago	415	0.009538	0.466766	0.384672	0.131789	0.007225	1e-05			415	0.007454	0.465417	0.383963	0.006473	0.136693		415	225_415	0.010256	0.466053	0.384965	0.138725		225_415	0.476349	0.369669	0.153982		225_415	0.486271	0.513729
Kalinago	49	1e-05	0.468773	0.432639	0.093547	0.005021	1e-05			49	1e-05	0.467665	0.432349	0.004043	0.095933		49	13_49	1e-05	0.46891	0.433299	0.097781		13_49	0.464267	0.4189	0.116833		13_49	0.464244	0.535756
Kalinago	145	0.000677	0.469171	0.333224	0.159552	0.006559	0.030817			145	0.001156	0.469008	0.332681	0.006846	0.190309		145	80_145	0.004233	0.469622	0.33366	0.192485		80_145	0.466807	0.320545	0.212647		80_145	0.49746	0.50254
Kalinago	329	0.057542	0.472412	0.28209	0.166775	0.001336	0.019846			329	0.056734	0.471766	0.281333	0.000883	0.189285		329	19_329	0.055942	0.472932	0.281384	0.189742		19_329	0.523883	0.268692	0.207425		19_329	0.550993	0.449007
Kalinago	285	1e-05	0.475274	0.415925	0.106595	0.001354	0.000842			285	1e-05	0.473667	0.415202	0.000364	0.110757		285	155_285	1e-05	0.473875	0.415338	0.110777		155_285	0.466531	0.400571	0.132898		155_285	0.471376	0.528624
Kalinago	243	0.004802	0.475936	0.325691	0.164503	1e-05	0.029058			243	0.00514	0.475609	0.325176	1e-05	0.194065		243	135_243	0.003722	0.476564	0.325266	0.194449		135_243	0.477165	0.310776	0.212058		135_243	0.503432	0.496568
Kalinago	328	0.014705	0.476333	0.369656	0.122659	1e-05	0.016638			328	0.014436	0.475819	0.369162	1e-05	0.140573		328	177_328	0.012986	0.47676	0.369314	0.14094		177_328	0.484363	0.356053	0.159583		177_328	0.499068	0.500932
Kalinago	254	1e-05	0.476659	0.426429	0.096396	0.000497	1e-05			254	1e-05	0.475155	0.425869	1e-05	0.098957		254	140_254	1e-05	0.475234	0.425934	0.098821		140_254	0.467088	0.412495	0.120417		140_254	0.4692	0.5308
Kalinago	108	0.004586	0.477707	0.3593	0.158388	1e-05	1e-05			108	0.001202	0.476074	0.358274	1e-05	0.16444		108	57_108	1e-05	0.476957	0.358411	0.164622		57_108	0.468188	0.34529	0.186522		57_108	0.490476	0.509524
Kalinago	247	0.005401	0.478268	0.397086	0.107466	0.006486	0.005292			247	0.004476	0.477396	0.396497	0.005856	0.115776		247	136_247	0.007192	0.477895	0.397396	0.117518		136_247	0.48119	0.3839	0.13491		136_247	0.487341	0.512659
Kalinago	312	0.009558	0.478924	0.344754	0.15634	1e-05	0.010415			312	0.007778	0.477705	0.343774	1e-05	0.170733		312	168_312	0.005607	0.479176	0.344062	0.171155		168_312	0.478904	0.330104	0.190991		168_312	0.501828	0.498172
Kalinago	425	1e-05	0.480074	0.412526	0.102737	0.004644	1e-05			425	1e-05	0.47829	0.411636	0.003949	0.106115		425	234_425	1e-05	0.479388	0.412534	0.108068		234_425	0.471525	0.398157	0.130318		234_425	0.476952	0.523048
Kalinago	316	0.001069	0.48399	0.319885	0.182031	1e-05	0.013015			316	1e-05	0.482122	0.318589	1e-05	0.19927		316	170_316	1e-05	0.482397	0.318501	0.199093		170_316	0.477055	0.304539	0.218406		170_316	0.508437	0.491563
Kalinago	99	0.007333	0.484403	0.382384	0.12586	1e-05	1e-05			99	0.005287	0.483277	0.381898	1e-05	0.129528		99	50_99	0.003641	0.484298	0.382163	0.129898		50_99	0.48445	0.36684	0.148709		50_99	0.494189	0.505811
Kalinago	276	0.009919	0.484801	0.321206	0.171687	1e-05	0.012377			276	0.007789	0.483609	0.320167	1e-05	0.188424		276	152_276	0.006135	0.48471	0.320298	0.188858		152_276	0.487698	0.305863	0.206439		152_276	0.516454	0.483546
Kalinago	251	0.011655	0.486781	0.379594	0.116305	0.005654	1e-05			251	0.009943	0.485647	0.379095	0.004846	0.120469		251	139_251	0.011756	0.486345	0.379907	0.121993		139_251	0.494165	0.364488	0.141346		139_251	0.503298	0.496702
Kalinago	259	0.013866	0.490772	0.387516	0.107826	1e-05	1e-05			259	0.011959	0.489744	0.386949	1e-05	0.111337		259	142_259	0.009603	0.491254	0.387281	0.111863		142_259	0.49765	0.371917	0.130433		142_259	0.502532	0.497468
Kalinago	37	1e-05	0.490966	0.323525	0.147964	1e-05	0.037525			37	0.000408	0.491917	0.323337	1e-05	0.184329		37	18_37	1e-05	0.492467	0.323339	0.184183		18_37	0.487384	0.309194	0.203423		18_37	0.511242	0.488758
Kalinago	374	0.005804	0.491162	0.418935	0.084079	1e-05	1e-05			374	0.00474	0.490441	0.418789	1e-05	0.08602		374	201_374	0.002985	0.491469	0.419112	0.086433		201_374	0.493086	0.402741	0.104173		201_374	0.489213	0.510787
Kalinago	19	1e-05	0.493416	0.328089	0.16398	1e-05	0.014495			19	1e-05	0.491679	0.326952	1e-05	0.18135		19	9_19	1e-05	0.491912	0.326884	0.181194		9_19	0.483527	0.313597	0.202876		9_19	0.511199	0.488801
Kalinago	287	0.006502	0.494157	0.334658	0.150521	1e-05	0.014151			287	0.004988	0.493394	0.333888	1e-05	0.16772		287	157_287	0.003387	0.494487	0.33405	0.168076		157_287	0.495086	0.318478	0.186436		157_287	0.514411	0.485589
Kalinago	84	0.006596	0.498411	0.367414	0.118441	0.002951	0.006186			84	0.005561	0.497386	0.36671	0.002412	0.127931		84	18_84	0.005708	0.498094	0.367277	0.128921		18_84	0.49947	0.351866	0.148664		18_84	0.509324	0.490676
Kalinago	78	0.002398	0.498648	0.367445	0.099136	1e-05	0.032363			78	0.004574	0.499322	0.367457	1e-05	0.128637		78	41_78	0.002216	0.500773	0.367734	0.129276		41_78	0.497767	0.351701	0.150531		41_78	0.509401	0.490599
Kalinago	280	0.03028	0.500488	0.296596	0.141956	0.008183	0.022498			280	0.030423	0.500092	0.296228	0.0081	0.165158		280	49_280	0.034346	0.500796	0.297293	0.167564		49_280	0.529898	0.282131	0.187971		49_280	0.553389	0.446611
Kalinago	75	1e-05	0.500626	0.352815	0.138726	0.004253	0.003569			75	1e-05	0.498612	0.351881	0.002861	0.146636		75	38_75	1e-05	0.499458	0.352525	0.148007		38_75	0.490228	0.338667	0.171106		38_75	0.506819	0.493181
Kalinago	236	0.01045	0.500786	0.377434	0.105686	0.005634	1e-05			236	0.009216	0.499878	0.377145	0.004778	0.108983		236	132_236	0.010947	0.500601	0.377968	0.110484		132_236	0.507982	0.362834	0.129184		132_236	0.514446	0.485554
Kalinago	169	1e-05	0.502069	0.361176	0.136725	1e-05	1e-05			169	1e-05	0.499326	0.359872	1e-05	0.140782		169	95_169	1e-05	0.499566	0.359892	0.140532		95_169	0.487398	0.347052	0.16555		95_169	0.502196	0.497804
Kalinago	203	1.5e-05	0.510264	0.36187	0.124592	1e-05	0.00325			203	1e-05	0.508154	0.360706	1e-05	0.13112		203	1_203	1e-05	0.508421	0.360798	0.130771		1_203	0.494479	0.34779	0.157731		1_203	0.507864	0.492136
Kalinago	413	0.005027	0.511056	0.366404	0.09576	1e-05	0.021742			413	0.005971	0.511304	0.366218	1e-05	0.116497		413	223_413	0.004605	0.51217	0.366429	0.116797		223_413	0.512717	0.351429	0.135854		223_413	0.520848	0.479152
Kalinago	309	1e-05	0.513343	0.366973	0.114643	1e-05	0.005021			309	1e-05	0.511619	0.36602	1e-05	0.122341		309	18_309	1e-05	0.511841	0.366048	0.122102		18_309	0.496201	0.353194	0.150605		18_309	0.5084	0.4916
Kalinago	194	1e-05	0.513402	0.39141	0.095158	1e-05	1e-05			194	1e-05	0.51246	0.391563	1e-05	0.095956		194	105_194	1e-05	0.512684	0.391624	0.095683		105_194	0.508065	0.375688	0.116247		105_194	0.506739	0.493261
Kalinago	223	0.009154	0.514591	0.381566	0.094669	1e-05	1e-05			223	0.007594	0.513618	0.380987	1e-05	0.097792		223	123_223	0.006091	0.514589	0.381288	0.098032		123_223	0.516188	0.364908	0.118904		123_223	0.516454	0.483546
Kalinago	446	0.010714	0.518188	0.351655	0.111768	0.006143	0.001532			446	0.009136	0.517254	0.351066	0.005263	0.117281		446	248_446	0.011289	0.517869	0.351925	0.118917		248_446	0.524089	0.335648	0.140263		248_446	0.534705	0.465295
Kalinago	52	0.006845	0.523269	0.363262	0.104725	0.001888	1e-05			52	0.005466	0.522325	0.36291	0.001058	0.108241		52	23_52	0.004632	0.523217	0.363304	0.108847		23_52	0.522451	0.347955	0.129595		23_52	0.52746	0.47254
Kalinago	139	0.001806	0.524236	0.31101	0.143147	0.003333	0.016468			139	0.000939	0.523615	0.31036	0.003172	0.161913		139	76_139	0.001472	0.524492	0.310892	0.163144		76_139	0.51886	0.296952	0.184188		76_139	0.541618	0.458382
Kalinago	64	1e-05	0.524684	0.364172	0.098675	0.011322	0.001138			64	1e-05	0.523069	0.363335	0.010612	0.102974		64	6_64	1e-05	0.52601	0.365696	0.108284		6_64	0.524439	0.349406	0.126155		6_64	0.526166	0.473834
Kalinago	409	0.0045	0.526606	0.358168	0.10249	0.000584	0.007653			409	0.003841	0.525982	0.357661	2e-05	0.112495		409	221_409	0.002341	0.526886	0.357926	0.112846		221_409	0.521096	0.343207	0.135697		221_409	0.529703	0.470297
Kalinago	240	0.035493	0.527442	0.295521	0.133111	1e-05	0.008423			240	0.03363	0.526318	0.294447	1e-05	0.145595		240	133_240	0.029612	0.529142	0.294948	0.146298		133_240	0.548222	0.280842	0.170936		133_240	0.569594	0.430406
Kalinago	381	0.009516	0.528742	0.34756	0.111057	0.003115	1e-05			381	0.008593	0.528031	0.347728	0.002257	0.113391		381	91_381	0.008786	0.52874	0.348199	0.114275		91_381	0.53125	0.332953	0.135797		91_381	0.538541	0.461459
Kalinago	217	0.010706	0.529306	0.297837	0.162131	1e-05	1e-05			217	0.007923	0.527502	0.296965	1e-05	0.167599		217	117_217	0.006003	0.528759	0.297147	0.168092		117_217	0.527599	0.28327	0.189131		117_217	0.552659	0.447341
Kalinago	195	0.020269	0.530729	0.352931	0.089641	0.000902	0.005528			195	0.019472	0.530123	0.352425	0.00064	0.097339		195	106_195	0.018454	0.531079	0.352731	0.097736		106_195	0.545071	0.336867	0.118062		106_195	0.550188	0.449812
Kalinago	177	0.005628	0.533149	0.327059	0.125269	0.006341	0.002554			177	0.003862	0.53209	0.32642	0.005383	0.132245		177	294_177	0.006131	0.532664	0.327288	0.133918		294_177	0.534271	0.3117	0.154029		294_177	0.545296	0.454704
Kalinago	159	0.005401	0.533433	0.314576	0.13303	0.003562	0.009999			159	0.004309	0.53255	0.31399	0.002852	0.146299		159	89_159	0.005071	0.533123	0.314514	0.147292		89_159	0.532999	0.300307	0.166694		89_159	0.550165	0.449835
Kalinago	302	1e-05	0.534213	0.379186	0.083069	1e-05	0.003513			302	1e-05	0.532952	0.378416	1e-05	0.088612		302	58_302	1e-05	0.533203	0.378541	0.088246		58_302	0.520964	0.364006	0.115031		58_302	0.519536	0.480464
Kalinago	278	0.008557	0.535193	0.33983	0.116399	1e-05	1e-05			278	0.006978	0.534624	0.34017	1e-05	0.118218		278	17_278	0.005511	0.535567	0.340468	0.118454		17_278	0.538041	0.323695	0.138264		17_278	0.545064	0.454936
Kalinago	308	1e-05	0.536331	0.269188	0.169026	0.003195	0.02225			308	1e-05	0.535333	0.268388	0.002937	0.193332		308	60_308	1e-05	0.536213	0.268943	0.194834		60_308	0.528408	0.255418	0.216175		60_308	0.560314	0.439686
Kalinago	257	0.014146	0.536426	0.282769	0.159795	0.000895	0.005969			257	0.012046	0.535085	0.281852	1e-05	0.171008		257	141_257	0.010826	0.535944	0.282009	0.171222		141_257	0.541786	0.266558	0.191656		141_257	0.565087	0.434913
Kalinago	148	0.003951	0.538389	0.334716	0.10067	1e-05	0.022264			148	0.004839	0.538388	0.334404	1e-05	0.122359		148	31_148	0.002445	0.53997	0.334775	0.12281		31_148	0.536169	0.318586	0.145245		31_148	0.547921	0.452079
Kalinago	423	0.005135	0.53869	0.367656	0.088499	1e-05	1e-05			423	0.003642	0.537913	0.367143	1e-05	0.091292		423	232_423	0.001714	0.539073	0.3675	0.091713		232_423	0.537975	0.351524	0.110502		232_423	0.535925	0.464075
Kalinago	408	0.012421	0.539172	0.369188	0.079199	1e-05	1e-05			408	0.011062	0.538389	0.368598	1e-05	0.081941		408	220_408	0.008808	0.539811	0.369014	0.082367		220_408	0.543348	0.353192	0.10346		220_408	0.541132	0.458868
Kalinago	390	0.023277	0.541418	0.211906	0.211119	1e-05	0.012269			390	0.020487	0.539546	0.210458	1e-05	0.229499		390	210_390	0.018531	0.540993	0.210572	0.229904		210_390	0.555337	0.196637	0.248026		210_390	0.598161	0.401839
Kalinago	42	0.002301	0.541722	0.29336	0.142739	1e-05	0.019867			42	0.001893	0.541186	0.292653	1e-05	0.164257		42	4_42	0.000309	0.542173	0.292812	0.164705		4_42	0.535805	0.276443	0.187752		4_42	0.559206	0.440794
Kalinago	436	0.013124	0.543682	0.311327	0.129862	1e-05	0.001995			436	0.010517	0.542512	0.310398	1e-05	0.136563		436	243_436	0.008804	0.543689	0.310606	0.136902		243_436	0.548367	0.293648	0.157985		243_436	0.561416	0.438584
Kalinago	187	0.010805	0.544966	0.298972	0.144885	0.000362	1e-05			187	0.008683	0.543631	0.298514	1e-05	0.149162		187	36_187	0.006985	0.544779	0.298679	0.149557		36_187	0.542215	0.283372	0.174413		36_187	0.56416	0.43584
Kalinago	10	1e-05	0.545046	0.325939	0.10739	1e-05	0.021606			10	1e-05	0.545287	0.325603	1e-05	0.12909		10	31_10	1e-05	0.545712	0.32563	0.128649		31_10	0.533523	0.311112	0.155365		31_10	0.549345	0.450655
Kalinago	314	0.031954	0.545219	0.31282	0.095436	1e-05	0.01456			314	0.032028	0.544879	0.312389	1e-05	0.110694		314	62_314	0.029705	0.546518	0.312723	0.111054		62_314	0.567182	0.29821	0.134608		62_314	0.577664	0.422336
Kalinago	416	1e-05	0.545322	0.2599	0.173215	1e-05	0.021543			416	1e-05	0.543902	0.258668	1e-05	0.19741		416	226_416	1e-05	0.544295	0.258627	0.197068		226_416	0.526578	0.245622	0.227801		226_416	0.564538	0.435462
Kalinago	104	0.051537	0.545787	0.233681	0.150042	0.006146	0.012807			104	0.049985	0.544861	0.232759	0.005703	0.166692		104	54_104	0.052353	0.545823	0.233437	0.168387		54_104	0.592452	0.218607	0.188941		54_104	0.622729	0.377271
Kalinago	87	1e-05	0.547709	0.334623	0.109042	0.008606	1e-05			87	1e-05	0.546021	0.333904	0.007484	0.112581		87	43_87	1e-05	0.548075	0.335561	0.116354		43_87	0.534781	0.320436	0.144783		43_87	0.547551	0.452449
Kalinago	348	0.002469	0.548772	0.307058	0.128769	0.002843	0.010089			348	0.001437	0.547973	0.306469	0.00241	0.14171		348	187_348	0.001653	0.548806	0.306942	0.142598		187_348	0.546745	0.291379	0.161876		187_348	0.562063	0.437937
Kalinago	43	1e-05	0.54966	0.292358	0.146001	0.001883	0.010088			43	1e-05	0.547998	0.291285	0.000881	0.159826		43	10_43	1e-05	0.548389	0.291408	0.160192		10_43	0.536366	0.277063	0.186571		10_43	0.56009	0.43991
Kalinago	357	0.00199	0.550351	0.302166	0.143136	0.000804	0.001553			357	1e-05	0.548708	0.30112	1e-05	0.150152		357	193_357	1e-05	0.548953	0.301119	0.149918		193_357	0.542586	0.285219	0.172196		193_357	0.561696	0.438304
Kalinago	28	1.4e-05	0.550766	0.376735	0.069294	1e-05	0.003181			28	1e-05	0.549851	0.376234	1e-05	0.073896		28	291_28	1e-05	0.550078	0.376372	0.07354		291_28	0.540994	0.361179	0.097827		291_28	0.537574	0.462426
Kalinago	322	0.000457	0.550921	0.292468	0.138363	0.009089	0.008702			322	1e-05	0.549593	0.291577	0.008094	0.150726		322	65_322	0.003035	0.550536	0.292908	0.153521		65_322	0.54662	0.278246	0.175134		65_322	0.567314	0.432686
Kalinago	121	0.035967	0.550981	0.33088	0.076189	0.005972	1e-05			121	0.036296	0.550897	0.331973	0.005482	0.075352		121	68_121	0.038597	0.551689	0.332854	0.07686		68_121	0.582902	0.318163	0.098935		68_121	0.581263	0.418737
Kalinago	233	1e-05	0.551054	0.365277	0.074739	0.003364	0.005557			233	1e-05	0.550405	0.364938	0.002908	0.081739		233	129_233	1e-05	0.551339	0.365672	0.082979		129_233	0.547813	0.349775	0.102412		129_233	0.544677	0.455323
Kalinago	442	0.015269	0.552197	0.215973	0.195533	0.003187	0.017841			442	0.013489	0.551024	0.214983	0.002543	0.217963		442	28_442	0.013646	0.551953	0.215363	0.219037		28_442	0.560565	0.199918	0.239517		28_442	0.602728	0.397272
Kalinago	21	0.011281	0.553621	0.307495	0.104719	0.001973	0.02091			21	0.01165	0.553711	0.307203	0.002214	0.125223		21	11_21	0.011571	0.554579	0.307654	0.126197		11_21	0.560286	0.292048	0.147666		11_21	0.574833	0.425167
Kalinago	24	0.018729	0.553718	0.33367	0.093863	1e-05	1e-05			24	0.017102	0.552849	0.333193	1e-05	0.096846		24	290_24	0.013894	0.554997	0.333677	0.097431		290_24	0.564283	0.316	0.119717		290_24	0.570082	0.429918
Kalinago	228	1e-05	0.554847	0.347706	0.097417	1e-05	1e-05			228	1e-05	0.553289	0.34719	1e-05	0.099501		228	127_228	1e-05	0.553498	0.347319	0.099173		127_228	0.547915	0.331777	0.120308		127_228	0.549905	0.450095
Kalinago	311	0.055487	0.556443	0.318664	0.069386	1e-05	1e-05			311	0.05467	0.555928	0.31847	1e-05	0.070922		311	167_311	0.052767	0.557452	0.318689	0.071092		167_311	0.603608	0.304166	0.092226		167_311	0.601902	0.398098
Kalinago	239	0.03527	0.557833	0.297027	0.106698	1e-05	0.003162			239	0.033513	0.556897	0.296309	1e-05	0.113272		239	41_239	0.031573	0.558289	0.296547	0.11359		41_239	0.581777	0.281399	0.136823		41_239	0.591064	0.408936
Kalinago	334	1e-05	0.561261	0.287221	0.140194	0.004322	0.006992			334	1e-05	0.559444	0.286204	0.003031	0.151311		334	86_334	1e-05	0.560354	0.286782	0.152854		86_334	0.541366	0.273735	0.1849		86_334	0.566181	0.433819
Kalinago	155	0.003198	0.561714	0.363325	0.065375	1e-05	0.006378			155	0.002908	0.561395	0.362992	1e-05	0.072696		155	86_155	0.001204	0.562449	0.363389	0.072958		86_155	0.559902	0.346373	0.093724		86_155	0.556529	0.443471
Kalinago	458	0.011017	0.56182	0.281897	0.120881	0.003011	0.021374			458	0.011215	0.56168	0.281453	0.003024	0.142627		458	255_458	0.01182	0.562461	0.282026	0.143694		255_458	0.56877	0.265391	0.165839		255_458	0.589193	0.410807
Kalinago	68	1e-05	0.563271	0.395894	0.02777	1e-05	0.013045			68	1e-05	0.564398	0.396131	1e-05	0.039451		68	17_68	1e-05	0.564719	0.396325	0.038946		17_68	0.55479	0.379436	0.065774		17_68	0.541692	0.458308
Kalinago	410	1e-05	0.563434	0.335374	0.101161	1e-05	1e-05			410	1e-05	0.561428	0.334304	1e-05	0.104248		410	222_410	1e-05	0.56183	0.334387	0.103773		222_410	0.554447	0.318366	0.127187		222_410	0.558434	0.441566
Kalinago	143	0.016439	0.564003	0.349978	0.064248	1e-05	0.005323			143	0.015921	0.563714	0.349561	1e-05	0.070794		143	79_143	0.013333	0.565459	0.350085	0.071124		79_143	0.574667	0.332612	0.092721		79_143	0.571874	0.428126
Kalinago	147	0.068504	0.564392	0.295511	0.062435	0.009148	1e-05			147	0.068988	0.564521	0.296514	0.008635	0.061343		147	54_147	0.07363	0.565218	0.297724	0.063428		54_147	0.632202	0.282328	0.08547		54_147	0.629576	0.370424
Kalinago	464	0.082127	0.566011	0.293777	0.049877	0.008199	1e-05			464	0.082606	0.566181	0.294697	0.00792	0.048597		464	96_464	0.086747	0.56704	0.295779	0.050434		96_464	0.648419	0.280821	0.07076		96_464	0.638852	0.361148
Kalinago	36	0.001325	0.566559	0.293227	0.124524	0.00036	0.014006			36	0.000924	0.565961	0.292578	1.8e-05	0.14052		36	17_36	1e-05	0.566638	0.292732	0.14062		17_36	0.562556	0.275915	0.161529		17_36	0.578306	0.421694
Kalinago	306	0.003598	0.568341	0.341296	0.085765	0.000134	0.000866			306	0.002106	0.567651	0.340742	1e-05	0.08949		306	59_306	0.000622	0.56853	0.341056	0.089792		59_306	0.562506	0.324649	0.112845		59_306	0.56456	0.43544
Kalinago	366	0.017089	0.568532	0.299931	0.108614	0.005824	1e-05			366	0.015983	0.567754	0.29998	0.004848	0.111436		366	199_366	0.017547	0.568668	0.300763	0.113022		199_366	0.577715	0.285439	0.136846		199_366	0.589364	0.410636
Kalinago	79	0.006639	0.568614	0.284979	0.111797	1e-05	0.02796			79	0.007876	0.56892	0.284661	1e-05	0.138533		79	42_79	0.005338	0.570525	0.28496	0.139177		42_79	0.570387	0.267396	0.162217		42_79	0.589984	0.410016
Kalinago	373	0.004736	0.570404	0.331788	0.09046	0.002602	1e-05			373	0.00436	0.569879	0.332104	0.001631	0.092026		373	200_373	0.003813	0.570842	0.332603	0.092742		200_373	0.569993	0.316562	0.113445		200_373	0.572	0.428
Kalinago	45	0.002266	0.571199	0.295825	0.119224	0.006097	0.005389			45	0.000937	0.570195	0.295067	0.005471	0.12833		45	21_45	0.00325	0.570796	0.295969	0.129985		21_45	0.566682	0.281073	0.152246		21_45	0.58285	0.41715
Kalinago	81	0.006519	0.572206	0.295945	0.107381	1e-05	0.017939			81	0.006739	0.571956	0.295567	1e-05	0.125729		81	8_81	0.004597	0.573342	0.295832	0.12623		8_81	0.566679	0.279967	0.153355		8_81	0.582835	0.417165
Kalinago	422	0.009638	0.572495	0.215932	0.194274	1e-05	0.007651			422	0.006067	0.570838	0.214605	1e-05	0.20848		422	231_422	0.004022	0.572169	0.21475	0.209059		231_422	0.568781	0.200074	0.231145		231_422	0.610714	0.389286
Kalinago	51	0.00014	0.572978	0.334965	0.08793	0.003976	1e-05			51	1e-05	0.571894	0.334704	0.002934	0.090458		51	14_51	1e-05	0.572812	0.335432	0.091746		14_51	0.566072	0.318764	0.115165		14_51	0.569855	0.430145
Kalinago	375	0.016245	0.573372	0.300761	0.105552	0.00406	1e-05			375	0.015447	0.572821	0.301127	0.003328	0.107277		375	26_375	0.015964	0.573822	0.301747	0.108467		26_375	0.583616	0.28615	0.130234		26_375	0.592353	0.407647
Kalinago	237	0.037313	0.577151	0.286314	0.099201	1e-05	1e-05			237	0.035597	0.576246	0.285868	1e-05	0.10228		237	66_237	0.032355	0.578512	0.286296	0.102837		66_237	0.601943	0.271194	0.126864		66_237	0.610862	0.389138
Kalinago	418	0.008186	0.57965	0.255995	0.140863	0.006478	0.008828			418	0.006744	0.57868	0.25522	0.005729	0.153626		418	228_418	0.009157	0.579403	0.25607	0.15537		228_418	0.579634	0.24104	0.179326		228_418	0.605037	0.394963
Kalinago	184	1e-05	0.581091	0.254862	0.153733	1e-05	0.010294			184	1e-05	0.578931	0.253458	1e-05	0.167592		184	100_184	1e-05	0.579229	0.25343	0.167331		100_184	0.564053	0.239846	0.196101		100_184	0.594816	0.405184
Kalinago	124	0.094705	0.581107	0.268366	0.055802	1e-05	1e-05			124	0.09424	0.580811	0.26841	1e-05	0.056529		124	25_124	0.091852	0.582819	0.268614	0.056715		25_124	0.66887	0.253469	0.077661		25_124	0.666407	0.333593
Kalinago	462	1e-05	0.581505	0.294183	0.124282	1e-05	1e-05			462	1e-05	0.579603	0.293564	1e-05	0.126813		462	257_462	1e-05	0.579901	0.293616	0.126473		257_462	0.565888	0.278924	0.155189		257_462	0.580229	0.419771
Kalinago	352	0.011285	0.581664	0.256159	0.139191	0.002206	0.009495			352	0.009872	0.580763	0.25543	0.001635	0.152299		352	70_352	0.009648	0.581599	0.255789	0.152965		70_352	0.585496	0.24014	0.174364		70_352	0.606227	0.393773
Kalinago	372	1e-05	0.584213	0.283587	0.132169	1e-05	1e-05			372	1e-05	0.581652	0.282419	1e-05	0.135909		372	74_372	1e-05	0.581998	0.28241	0.135582		74_372	0.572058	0.268674	0.159269		74_372	0.587606	0.412394
Kalinago	219	0.028563	0.584229	0.284519	0.095293	0.004056	0.00334			219	0.027653	0.583347	0.284119	0.003347	0.101534		219	119_219	0.028518	0.584138	0.284729	0.102614		119_219	0.608826	0.269188	0.121985		119_219	0.613269	0.386731
Kalinago	196	0.00345	0.586124	0.305886	0.102058	0.002472	1e-05			196	0.002247	0.585363	0.305798	0.001831	0.104761		196	37_196	0.002251	0.586028	0.306238	0.105484		37_196	0.581664	0.289088	0.129248		37_196	0.590335	0.409665
Kalinago	245	0.017637	0.588258	0.217559	0.153971	1e-05	0.022565			245	0.017223	0.587766	0.216837	1e-05	0.178164		245	69_245	0.015235	0.589172	0.217016	0.178576		69_245	0.596321	0.202779	0.2009		69_245	0.630194	0.369806
Kalinago	136	1e-05	0.588681	0.30817	0.093699	0.003965	0.005476			136	1e-05	0.587573	0.307549	0.003606	0.101261		136	28_136	1e-05	0.588654	0.308394	0.102941		28_136	0.581742	0.292534	0.125724		28_136	0.5862	0.4138
Kalinago	35	0.116176	0.589408	0.20324	0.091156	1e-05	1e-05			35	0.115489	0.589173	0.203813	1e-05	0.091515		35	3_35	0.113777	0.590873	0.203809	0.091541		3_35	0.699018	0.190213	0.110768		3_35	0.706871	0.293129
Kalinago	235	0.010172	0.590714	0.263287	0.116307	0.00284	0.01668			235	0.010122	0.590234	0.262829	0.002628	0.134187		235	131_235	0.010612	0.590983	0.263316	0.13509		131_235	0.593346	0.247897	0.158757		131_235	0.611057	0.388943
Kalinago	288	0.008575	0.592921	0.21379	0.173202	0.00142	0.010092			288	0.006654	0.59163	0.212778	0.000402	0.188536		288	158_288	0.005511	0.592598	0.212917	0.188974		158_288	0.591083	0.196949	0.211968		158_288	0.623951	0.376049
Kalinago	338	0.005787	0.595166	0.238659	0.121648	1e-05	0.03873			338	0.007895	0.595903	0.238414	0.000442	0.157346		338	182_338	0.006631	0.596873	0.238638	0.157858		182_338	0.597387	0.222876	0.179736		182_338	0.624783	0.375217
Kalinago	303	1e-05	0.596813	0.233182	0.152208	1e-05	0.017778			303	1e-05	0.595571	0.232167	1e-05	0.172241		303	80_303	1e-05	0.59593	0.232127	0.171933		80_303	0.585439	0.217321	0.19724		80_303	0.617169	0.382831
Kalinago	313	0.034833	0.598578	0.283629	0.08294	1e-05	1e-05			313	0.033325	0.597605	0.282976	1e-05	0.086083		313	82_313	0.030739	0.599414	0.283377	0.08647		82_313	0.624461	0.268615	0.106925		82_313	0.627672	0.372328
Kalinago	360	1e-05	0.601308	0.243476	0.145163	0.004962	0.00508			360	1e-05	0.599123	0.242495	0.003541	0.154831		360	195_360	1e-05	0.600266	0.24321	0.156514		195_360	0.592396	0.228799	0.178805		195_360	0.615191	0.384809
Kalinago	220	1e-05	0.601403	0.290211	0.096544	0.011821	1e-05			220	1e-05	0.600037	0.289595	0.010828	0.09953		220	120_220	0.002248	0.602094	0.291648	0.104011		120_220	0.600118	0.275897	0.123984		120_220	0.605289	0.394711
Kalinago	141	0.003898	0.602753	0.353247	0.035984	0.004107	1e-05			141	0.004215	0.602844	0.353788	0.003865	0.035287		141	78_141	0.005589	0.603452	0.35462	0.036339		78_141	0.605538	0.335352	0.05911		78_141	0.593479	0.406521
Kalinago	230	0.029408	0.602804	0.260948	0.098898	0.007932	1e-05			230	0.02793	0.601934	0.260542	0.007065	0.102529		230	65_230	0.031314	0.602585	0.261609	0.104493		65_230	0.622904	0.247628	0.129467		65_230	0.634382	0.365618
Kalinago	260	0.009305	0.60353	0.309501	0.077643	1e-05	1e-05			260	0.009052	0.603101	0.309939	1e-05	0.077898		260	74_260	0.006454	0.604767	0.310374	0.078405		74_260	0.609607	0.292934	0.09746		74_260	0.607262	0.392738
Kalinago	133	1e-05	0.604646	0.255775	0.125469	1e-05	0.014089			133	1e-05	0.603595	0.254969	1e-05	0.141416		133	52_133	1e-05	0.603884	0.25498	0.141127		52_133	0.596479	0.240272	0.163249		52_133	0.613621	0.386379
Kalinago	327	0.012382	0.604793	0.277301	0.103797	0.001717	1e-05			327	0.011051	0.603939	0.277044	0.000784	0.107182		327	176_327	0.010213	0.604887	0.27733	0.10757		176_327	0.609279	0.260835	0.129886		176_327	0.619659	0.380341
Kalinago	213	0.009432	0.605846	0.283707	0.100994	1e-05	1e-05			213	0.007834	0.605	0.283456	1e-05	0.1037		213	64_213	0.006017	0.606158	0.283771	0.104053		64_213	0.60629	0.267031	0.126679		64_213	0.612258	0.387742
Kalinago	304	1e-05	0.605998	0.299871	0.088343	0.001823	0.003955			304	1e-05	0.60484	0.299164	0.001064	0.094921		304	165_304	1e-05	0.605254	0.2995	0.095236		165_304	0.589084	0.2857	0.125216		165_304	0.597215	0.402785
Kalinago	20	0.005039	0.606064	0.274314	0.106455	1e-05	0.008117			20	0.003975	0.60525	0.273667	1e-05	0.117098		20	10_20	0.001873	0.606615	0.274053	0.117459		10_20	0.6044	0.25689	0.13871		10_20	0.614946	0.385054
Kalinago	279	0.050602	0.606829	0.23056	0.109691	0.002307	1e-05			279	0.049053	0.605862	0.230101	0.00113	0.113854		279	153_279	0.048038	0.60716	0.230375	0.114427		153_279	0.648171	0.214762	0.137068		153_279	0.662966	0.337034
Kalinago	105	0.004155	0.607121	0.246677	0.140486	0.001551	1e-05			105	0.002014	0.605643	0.245875	0.000379	0.14609		105	55_105	0.000786	0.606492	0.246105	0.146618		55_105	0.603442	0.229071	0.167486		55_105	0.62331	0.37669
Kalinago	427	0.016879	0.607579	0.287453	0.082052	0.006027	1e-05			427	0.01597	0.606892	0.287147	0.005317	0.084674		427	236_427	0.018185	0.607542	0.288055	0.086218		236_427	0.620212	0.271702	0.108086		236_427	0.624729	0.375271
Kalinago	250	0.012538	0.608754	0.283763	0.091352	1e-05	0.003583			250	0.01114	0.608035	0.283082	1e-05	0.097732		250	138_250	0.008331	0.609985	0.283522	0.098162		138_250	0.606567	0.267177	0.126256		138_250	0.616913	0.383087
Kalinago	300	1e-05	0.608968	0.274757	0.112482	1e-05	0.003773			300	1e-05	0.607103	0.273474	1e-05	0.119403		300	56_300	1e-05	0.607412	0.273582	0.118996		56_300	0.592233	0.258353	0.149413		56_300	0.606606	0.393394
Kalinago	67	0.01638	0.610699	0.296809	0.076092	1e-05	1e-05			67	0.015243	0.609784	0.296248	1e-05	0.078715		67	32_67	0.013352	0.611058	0.296519	0.079071		32_67	0.616589	0.279921	0.10349		32_67	0.617713	0.382287
Kalinago	176	0.011709	0.613263	0.255251	0.119756	1e-05	1e-05			176	0.010047	0.612304	0.255131	1e-05	0.122508		176	99_176	0.008047	0.613557	0.255402	0.122994		99_176	0.611654	0.240008	0.148338		99_176	0.629171	0.370829
Kalinago	450	1e-05	0.613426	0.287863	0.091014	1e-05	0.007678			450	1e-05	0.612494	0.287183	1e-05	0.100303		450	250_450	1e-05	0.612633	0.287251	0.100106		250_450	0.60067	0.271712	0.127618		250_450	0.611034	0.388966
Kalinago	397	1e-05	0.615506	0.246252	0.137021	0.001201	1e-05			397	1e-05	0.613492	0.245738	1e-05	0.14075		397	214_397	1e-05	0.613676	0.245741	0.140572		214_397	0.607953	0.228778	0.163269		214_397	0.626508	0.373492
Kalinago	156	0.000319	0.617061	0.16864	0.188149	1e-05	0.025822			156	1e-05	0.616135	0.167536	1e-05	0.21631		156	33_156	1e-05	0.616607	0.167403	0.21598		33_156	0.606842	0.15372	0.239437		33_156	0.655753	0.344247
Kalinago	77	0.039959	0.618584	0.248773	0.092665	1e-05	1e-05			77	0.039397	0.618247	0.249451	1e-05	0.092894		77	40_77	0.037161	0.619858	0.249779	0.093201		40_77	0.649928	0.23454	0.115532		40_77	0.65774	0.34226
Kalinago	401	0.019278	0.619599	0.302064	0.054815	0.004235	1e-05			401	0.0194	0.61951	0.302655	0.004149	0.054286		401	216_401	0.020867	0.620175	0.303457	0.055501		216_401	0.635094	0.286591	0.078314		216_401	0.629832	0.370168
Kalinago	358	0.002694	0.620297	0.316813	0.057017	0.00317	1e-05			358	0.002488	0.619904	0.316959	0.002995	0.057653		358	88_358	0.003078	0.62064	0.317649	0.058633		88_358	0.616799	0.301222	0.081979		88_358	0.612854	0.387146
Kalinago	432	0.009021	0.620384	0.262165	0.097045	0.009656	0.001729			432	0.007633	0.61953	0.261472	0.008974	0.10239		432	85_432	0.012077	0.620147	0.262803	0.104973		85_432	0.619985	0.248503	0.131512		85_432	0.632722	0.367278
Kalinago	305	0.014698	0.620787	0.302076	0.059532	0.002896	1e-05			305	0.014115	0.620162	0.301669	0.002395	0.06166		305	166_305	0.014477	0.620877	0.302216	0.062431		166_305	0.635425	0.283279	0.081296		166_305	0.629932	0.370068
Kalinago	292	0.003869	0.624024	0.238595	0.13083	1e-05	0.002673			292	0.001669	0.622695	0.237711	1e-05	0.137915		292	161_292	3.9e-05	0.623743	0.23797	0.138248		161_292	0.617716	0.221852	0.160432		161_292	0.637543	0.362457
Kalinago	256	0.007232	0.624381	0.232602	0.134336	0.00144	1e-05			256	0.005315	0.622989	0.231819	0.000312	0.139565		256	72_256	0.004237	0.623779	0.232052	0.139933		72_256	0.618905	0.216299	0.164796		72_256	0.640186	0.359814
Kalinago	451	0.00459	0.625548	0.230963	0.136066	1e-05	0.002824			451	0.001906	0.624182	0.229765	1e-05	0.144137		451	96_451	0.000232	0.625259	0.23004	0.144469		96_451	0.617671	0.214808	0.167521		96_451	0.640201	0.359799
Kalinago	102	0.000918	0.627413	0.260067	0.103641	0.007951	1e-05			102	0.000247	0.626905	0.260482	0.00678	0.105586		102	52_102	0.003401	0.627554	0.261632	0.107413		52_102	0.623266	0.245314	0.13142		52_102	0.635344	0.364656
Kalinago	454	0.022038	0.631462	0.242226	0.102488	1e-05	0.001776			454	0.020056	0.630318	0.241404	1e-05	0.108212		454	253_454	0.017942	0.631758	0.241707	0.108592		253_454	0.641801	0.22519	0.133008		253_454	0.653501	0.346499
Kalinago	190	1e-05	0.631883	0.252132	0.110105	1e-05	0.005859			190	1e-05	0.63019	0.251133	1e-05	0.118657		190	102_190	1e-05	0.630629	0.251181	0.11818		102_190	0.616108	0.236504	0.147388		102_190	0.633104	0.366896
Kalinago	161	1e-05	0.632027	0.258681	0.093273	1e-05	0.015999			161	1e-05	0.631928	0.258244	1e-05	0.109808		161	57_161	1e-05	0.63211	0.258315	0.109565		57_161	0.620797	0.241588	0.137615		57_161	0.634601	0.365399
Kalinago	30	0.00867	0.632255	0.295143	0.063912	1e-05	1e-05			30	0.008652	0.631977	0.295664	1e-05	0.063697		30	14_30	0.006594	0.633305	0.296031	0.06407		14_30	0.637101	0.277228	0.085672		14_30	0.631511	0.368489
Kalinago	380	0.018687	0.632699	0.239287	0.10093	0.008387	1e-05			380	0.018026	0.632248	0.239741	0.007347	0.102638		380	77_380	0.021819	0.632768	0.240822	0.104591		77_380	0.646231	0.224887	0.128882		77_380	0.658936	0.341064
Kalinago	238	0.038524	0.632849	0.249748	0.07366	1e-05	0.005208			238	0.037817	0.632356	0.24932	1e-05	0.080498		238	67_238	0.035717	0.633842	0.249593	0.080848		67_238	0.661379	0.233027	0.105594		67_238	0.666853	0.333147
Kalinago	347	0.000419	0.633862	0.186972	0.157136	0.002043	0.019569			347	1e-05	0.632927	0.186041	0.001671	0.179351		347	21_347	1e-05	0.633641	0.186345	0.180004		21_347	0.624557	0.172746	0.202697		21_347	0.661336	0.338664
Kalinago	389	0.010438	0.634237	0.26467	0.089031	0.001615	1e-05			389	0.010452	0.634098	0.265737	0.000952	0.088761		389	92_389	0.009823	0.634945	0.266123	0.089109		92_389	0.636054	0.250604	0.113342		92_389	0.6408	0.3592
Kalinago	189	0.005528	0.637775	0.228329	0.120228	0.00813	1e-05			189	0.003604	0.636492	0.227639	0.007188	0.125077		189	60_189	0.006918	0.637127	0.228775	0.127181		60_189	0.638404	0.211061	0.150535		60_189	0.654602	0.345398
Kalinago	92	1e-05	0.639503	0.246749	0.091819	1e-05	0.021909			92	1e-05	0.640071	0.246608	1e-05	0.113301		92	45_92	1e-05	0.640458	0.24669	0.112842		45_92	0.630337	0.230826	0.138837		45_92	0.641618	0.358382
Kalinago	336	1e-05	0.639792	0.232201	0.127977	1e-05	1e-05			336	1e-05	0.637111	0.230903	1e-05	0.131966		336	87_336	1e-05	0.637407	0.230911	0.131672		87_336	0.626855	0.216726	0.156419		87_336	0.647053	0.352947
Kalinago	274	1.7e-05	0.640329	0.250125	0.109509	1e-05	1e-05			274	1e-05	0.638003	0.248837	1e-05	0.11314		274	76_274	1e-05	0.638291	0.248902	0.112797		76_274	0.625137	0.23403	0.140833		76_274	0.637933	0.362067
Kalinago	428	1e-05	0.641101	0.265703	0.077642	0.009185	0.00636			428	1e-05	0.640398	0.265165	0.00888	0.085547		428	237_428	0.002761	0.641685	0.266734	0.08882		237_428	0.637685	0.250234	0.112081		237_428	0.644521	0.355479
Kalinago	47	0.018539	0.641198	0.259043	0.080569	0.000641	1e-05			47	0.017781	0.640735	0.259224	1e-05	0.082251		47	37_47	0.01625	0.641802	0.259424	0.082524		37_47	0.651696	0.242177	0.106127		37_47	0.657661	0.342339
Kalinago	393	0.007854	0.641612	0.273921	0.076593	1e-05	1e-05			393	0.006355	0.640885	0.2734	1e-05	0.07935		393	79_393	0.004423	0.642147	0.273785	0.079645		79_393	0.639828	0.255962	0.10421		79_393	0.6417	0.3583
Kalinago	131	1e-05	0.642051	0.208456	0.147182	1e-05	0.002291			131	1e-05	0.639172	0.207037	1e-05	0.153771		131	50_131	1e-05	0.639401	0.207106	0.153483		50_131	0.627565	0.193022	0.179413		50_131	0.65405	0.34595
Kalinago	270	1e-05	0.642782	0.226038	0.129039	0.00212	1e-05			270	1e-05	0.640593	0.2251	0.00078	0.133518		270	48_270	1e-05	0.640982	0.225279	0.133729		48_270	0.629764	0.211531	0.158705		48_270	0.651334	0.348666
Kalinago	354	0.004692	0.643618	0.162289	0.179861	1e-05	0.00953			354	0.00195	0.642193	0.161351	1e-05	0.194496		354	22_354	0.000152	0.643398	0.161466	0.194984		22_354	0.636895	0.146648	0.216457		22_354	0.675773	0.324227
Kalinago	58	0.000443	0.644632	0.233841	0.121065	1e-05	1e-05			58	1e-05	0.642439	0.232776	1e-05	0.124765		58	40_58	1e-05	0.642642	0.232808	0.12454		40_58	0.629254	0.2182	0.152546		40_58	0.648496	0.351504
Kalinago	406	0.032839	0.644647	0.25413	0.0683	7.5e-05	1e-05			406	0.032713	0.644465	0.25483	1e-05	0.067982		406	219_406	0.031388	0.645457	0.255087	0.068069		219_406	0.669696	0.23749	0.092813		219_406	0.671411	0.328589
Kalinago	253	0.018316	0.644698	0.248377	0.088589	1e-05	1e-05			253	0.016613	0.64388	0.247914	1e-05	0.091583		253	71_253	0.015219	0.644842	0.248143	0.091796		71_253	0.654029	0.23142	0.114552		71_253	0.66233	0.33767
Kalinago	359	0.007749	0.644946	0.279842	0.066024	0.001429	1e-05			359	0.007025	0.644366	0.279606	0.001299	0.067704		359	194_359	0.006552	0.645143	0.280051	0.068254		194_359	0.643735	0.263603	0.092661		194_359	0.641676	0.358324
Kalinago	249	0.007322	0.645409	0.2202	0.126513	1e-05	0.000546			249	0.004523	0.644126	0.219211	1e-05	0.132131		249	137_249	0.001306	0.646254	0.219689	0.13275		137_249	0.642153	0.201959	0.155887		137_249	0.660301	0.339699
Kalinago	144	0.008062	0.645822	0.26644	0.071917	0.001485	0.006275			144	0.007739	0.645353	0.266125	0.001249	0.079534		144	30_144	0.007213	0.646236	0.26651	0.080041		30_144	0.642483	0.251897	0.10562		30_144	0.647206	0.352794
Kalinago	398	0.011314	0.646694	0.245659	0.096313	1e-05	1e-05			398	0.009794	0.645843	0.245427	1e-05	0.098926		398	80_398	0.008329	0.646884	0.245696	0.099091		80_398	0.65014	0.228402	0.121458		80_398	0.660793	0.339207
Kalinago	248	0.029943	0.64851	0.190268	0.129661	1e-05	0.001608			248	0.027234	0.647062	0.189105	1e-05	0.136589		248	43_248	0.024378	0.649056	0.189464	0.137102		43_248	0.666449	0.173299	0.160252		43_248	0.690288	0.309712
Kalinago	191	1e-05	0.648868	0.269505	0.080833	0.000774	1e-05			191	1e-05	0.647708	0.269251	1e-05	0.08302		191	103_191	1e-05	0.647852	0.269378	0.08276		103_191	0.636632	0.252247	0.111122		103_191	0.642674	0.357326
Kalinago	192	1e-05	0.649162	0.244386	0.099135	0.001186	0.006122			192	1e-05	0.648025	0.243734	0.000638	0.107593		192	12_192	1e-05	0.648347	0.243964	0.107679		12_192	0.636659	0.228778	0.134563		12_192	0.648896	0.351104
Kalinago	56	1e-05	0.649179	0.245425	0.105366	1e-05	1e-05			56	1e-05	0.647257	0.244631	1e-05	0.108091		56	26_56	1e-05	0.647442	0.244737	0.107811		26_56	0.633701	0.228144	0.138155		26_56	0.647764	0.352236
Kalinago	188	1e-05	0.649281	0.23928	0.094099	1e-05	0.017321			188	1e-05	0.64937	0.239008	1e-05	0.111603		188	59_188	1e-05	0.649652	0.239086	0.111252		59_188	0.64121	0.221593	0.137197		59_188	0.652923	0.347077
Kalinago	126	0.006193	0.649332	0.256327	0.088127	1e-05	1e-05			126	0.005009	0.648551	0.256139	1e-05	0.090291		126	70_126	0.002512	0.650173	0.25657	0.090746		70_126	0.646991	0.238955	0.114054		70_126	0.654678	0.345322
Kalinago	53	1e-05	0.649489	0.258411	0.085926	1e-05	0.006154			53	1e-05	0.648403	0.257741	1e-05	0.093836		53	39_53	1e-05	0.648668	0.257844	0.093478		39_53	0.636609	0.241888	0.121503		39_53	0.645574	0.354426
Kalinago	244	0.026913	0.649725	0.184507	0.138835	1e-05	1e-05			244	0.023671	0.648512	0.183498	1e-05	0.144309		244	42_244	0.020761	0.650559	0.18384	0.14484		42_244	0.662767	0.168633	0.1686		42_244	0.689034	0.310966
Kalinago	395	0.006519	0.649755	0.236873	0.099158	0.004896	0.0028			395	0.005361	0.64883	0.23622	0.003808	0.105781		395	212_395	0.006673	0.649483	0.236957	0.106887		212_395	0.646916	0.220799	0.132285		212_395	0.660883	0.339117
Kalinago	3	0.006633	0.65076	0.208693	0.12663	0.002857	0.004427			3	0.004931	0.649622	0.20803	0.002064	0.135352		3	1_3	0.00486	0.650492	0.208447	0.136201		1_3	0.647566	0.191255	0.161179		1_3	0.66946	0.33054
Kalinago	414	0.009248	0.651149	0.240029	0.099554	1e-05	1e-05			414	0.007106	0.650303	0.239316	1e-05	0.103265		414	224_414	0.004937	0.651818	0.239691	0.103554		224_414	0.648522	0.223384	0.128094		224_414	0.662429	0.337571
Kalinago	386	0.005167	0.651911	0.268023	0.074879	1e-05	1e-05			386	0.004542	0.651216	0.26798	1e-05	0.076252		386	207_386	0.003249	0.652098	0.268257	0.076396		207_386	0.649125	0.249045	0.10183		207_386	0.650443	0.349557
Kalinago	448	0.001286	0.652126	0.219099	0.11593	0.000776	0.010782			448	0.000736	0.651312	0.218561	0.000293	0.129098		448	249_448	1e-05	0.651953	0.218741	0.129295		249_448	0.647141	0.203295	0.149563		249_448	0.663959	0.336041
Kalinago	283	0.075325	0.652841	0.187834	0.08398	1e-05	1e-05			283	0.074085	0.652259	0.187738	1e-05	0.085908		283	154_283	0.071914	0.654075	0.187971	0.086039		154_283	0.718753	0.171097	0.11015		154_283	0.72796	0.27204
Kalinago	430	0.041379	0.65362	0.242342	0.058863	0.003786	1e-05			430	0.041343	0.653417	0.242735	0.003533	0.058972		430	239_430	0.042223	0.654478	0.243466	0.059833		239_430	0.691304	0.224856	0.083841		239_430	0.689371	0.310629
Kalinago	153	0.018941	0.655725	0.250846	0.073915	0.000564	1e-05			153	0.018226	0.655117	0.250719	1e-05	0.075928		153	32_153	0.016793	0.656079	0.251018	0.07611		32_153	0.667065	0.235763	0.097171		32_153	0.669602	0.330398
Kalinago	456	0.007114	0.657295	0.226294	0.109277	1e-05	1e-05			456	0.005298	0.656215	0.225731	1e-05	0.112746		456	91_456	0.003138	0.657671	0.22603	0.11316		91_456	0.649182	0.212325	0.138493		91_456	0.665683	0.334317
Kalinago	346	0.000149	0.657833	0.220068	0.094405	0.000965	0.026581			346	0.001307	0.658171	0.219861	0.001774	0.118887		346	186_346	0.001018	0.658969	0.220309	0.119704		186_346	0.643916	0.203643	0.152441		186_346	0.664872	0.335128
Kalinago	7	1e-05	0.657921	0.263494	0.078555	1e-05	1e-05			7	1e-05	0.65758	0.264219	1e-05	0.078181		7	5_7	1e-05	0.657739	0.264411	0.07784		5_7	0.647804	0.247613	0.104583		5_7	0.651234	0.348766
Kalinago	74	0.003085	0.658955	0.213574	0.102612	1e-05	0.021763			74	0.003586	0.658971	0.213119	1e-05	0.124314		74	37_74	0.000368	0.660977	0.213626	0.125029		37_74	0.655287	0.194894	0.14982		37_74	0.676765	0.323235
Kalinago	118	0.006012	0.659664	0.285267	0.049037	1e-05	1e-05			118	0.005395	0.659141	0.284887	1e-05	0.050567		118	65_118	0.002798	0.660775	0.285392	0.051035		65_118	0.656326	0.265771	0.077903		65_118	0.652278	0.347722
Kalinago	198	0.001539	0.660265	0.266851	0.068941	0.002394	1e-05			198	0.000684	0.659957	0.267026	0.001973	0.07036		198	61_198	0.000766	0.660577	0.267562	0.071095		61_198	0.654761	0.248632	0.096607		61_198	0.657133	0.342867
Kalinago	391	0.009678	0.662665	0.244491	0.080951	0.002204	1e-05			391	0.00877	0.661922	0.244243	0.001676	0.083389		391	211_391	0.008534	0.662698	0.244706	0.084063		211_391	0.662808	0.22739	0.109802		211_391	0.670081	0.329919
Kalinago	261	0.014188	0.663882	0.244126	0.077784	1e-05	1e-05			261	0.012927	0.663195	0.243757	1e-05	0.080111		261	143_261	0.010567	0.664742	0.244131	0.08056		143_261	0.667904	0.225907	0.106189		143_261	0.673981	0.326019
Kalinago	384	0.008627	0.665144	0.21586	0.110349	1e-05	1e-05			384	0.007117	0.664171	0.215815	1e-05	0.112887		384	205_384	0.005237	0.665366	0.216117	0.11328		205_384	0.66514	0.199986	0.134874		205_384	0.680851	0.319149
Kalinago	385	0.001387	0.666199	0.254926	0.077468	1e-05	1e-05			385	0.000158	0.665434	0.25446	1e-05	0.079939		385	206_385	1e-05	0.665813	0.254597	0.07958		206_385	0.659215	0.23529	0.105496		206_385	0.661394	0.338606
Kalinago	93	0.002369	0.666331	0.241368	0.077248	1e-05	0.012674			93	0.002559	0.666086	0.241038	1e-05	0.090307		93	292_93	0.000324	0.667528	0.241447	0.090701		292_93	0.658298	0.224031	0.117671		292_93	0.666139	0.333861
Kalinago	429	1e-05	0.667538	0.194577	0.137855	1e-05	1e-05			429	1e-05	0.665231	0.193938	1e-05	0.140811		429	238_429	1e-05	0.66543	0.193947	0.140612		238_429	0.650541	0.179535	0.169925		238_429	0.676232	0.323768
Kalinago	400	0.006626	0.669162	0.243945	0.075906	1e-05	0.004351			400	0.005668	0.668672	0.243493	1e-05	0.082156		400	303_400	0.003953	0.669812	0.24389	0.082345		303_400	0.669981	0.22609	0.103929		303_400	0.67305	0.32695
Kalinago	349	0.008313	0.669699	0.18152	0.127855	0.004175	0.008438			349	0.006944	0.668687	0.180754	0.003588	0.140027		349	188_349	0.007791	0.669548	0.181373	0.141287		188_349	0.669051	0.165997	0.164953		188_349	0.696933	0.303067
Kalinago	142	0.009931	0.66995	0.18715	0.125095	0.007865	1e-05			142	0.007792	0.669078	0.186731	0.006945	0.129454		142	29_142	0.011172	0.669659	0.1878	0.131369		29_142	0.671793	0.173049	0.155158		29_142	0.693936	0.306064
Kalinago	402	1.6e-05	0.670087	0.215755	0.11046	0.003672	1e-05			402	1e-05	0.668427	0.215336	0.002471	0.113755		402	81_402	1e-05	0.669313	0.215862	0.114816		81_402	0.660986	0.201055	0.137959		81_402	0.677019	0.322981
Kalinago	113	0.019248	0.670707	0.22215	0.084161	0.003723	1e-05			113	0.018393	0.670146	0.222052	0.002902	0.086508		113	61_113	0.018764	0.671045	0.222647	0.087545		61_113	0.680855	0.20497	0.114175		61_113	0.690662	0.309338
Kalinago	111	1e-05	0.67177	0.197197	0.131003	1e-05	1e-05			111	1e-05	0.669091	0.195731	1e-05	0.135158		111	60_111	1e-05	0.669355	0.195772	0.134863		60_111	0.653132	0.182042	0.164826		60_111	0.676906	0.323094
Kalinago	76	0.065773	0.672084	0.166906	0.086598	0.008629	1e-05			76	0.064913	0.671475	0.166639	0.007789	0.089184		76	39_76	0.068805	0.672417	0.167672	0.091107		39_76	0.730073	0.153549	0.116378		39_76	0.745643	0.254357
Kalinago	364	0.008419	0.67226	0.207702	0.104031	1e-05	0.007578			364	0.007498	0.671439	0.207103	1e-05	0.113951		364	197_364	0.005785	0.672557	0.207348	0.114311		197_364	0.674422	0.189403	0.136175		197_364	0.689031	0.310969
Kalinago	426	0.017362	0.673011	0.248552	0.056717	0.002283	0.002074			426	0.016843	0.672567	0.248254	0.002136	0.060199		426	235_426	0.016659	0.673521	0.24883	0.06099		235_426	0.681595	0.230714	0.087691		235_426	0.681999	0.318001
Kalinago	70	0.006183	0.673085	0.282876	0.037836	1e-05	1e-05			70	0.00593	0.672769	0.282678	1e-05	0.038614		70	33_70	0.003908	0.674068	0.283149	0.038874		33_70	0.671144	0.263771	0.065085		33_70	0.66373	0.33627
Kalinago	460	0.005333	0.674668	0.275431	0.044548	1e-05	1e-05			460	0.005113	0.67449	0.275704	1e-05	0.044683		460	256_460	0.003264	0.675637	0.276153	0.044947		256_460	0.672726	0.25775	0.069523		256_460	0.665609	0.334391
Kalinago	8	0.141983	0.674793	0.118702	0.062756	1e-05	0.001757			8	0.140923	0.674254	0.11821	1e-05	0.066603		8	2_8	0.139326	0.676076	0.118129	0.066469		2_8	0.805068	0.103377	0.091555		2_8	0.818713	0.181287
Kalinago	383	0.004485	0.67493	0.250222	0.070343	1e-05	1e-05			383	0.003709	0.674478	0.250372	1e-05	0.071431		383	204_383	0.00099	0.676223	0.250857	0.07193		204_383	0.67513	0.231449	0.093421		204_383	0.674981	0.325019
Kalinago	55	1e-05	0.67516	0.224544	0.100266	1e-05	1e-05			55	1e-05	0.672876	0.223273	1e-05	0.103831		55	25_55	1e-05	0.672888	0.22337	0.103731		25_55	0.646615	0.209944	0.143441		25_55	0.661296	0.338704
Kalinago	284	0.12097	0.676519	0.137242	0.065239	1e-05	2e-05			284	0.120025	0.675675	0.136903	1e-05	0.067386		284	78_284	0.117457	0.678098	0.137102	0.067343		78_284	0.788161	0.122041	0.089798		78_284	0.797031	0.202969
Kalinago	46	1e-05	0.676556	0.223457	0.083091	1e-05	0.016876			46	1e-05	0.67678	0.223213	1e-05	0.099987		46	22_46	1e-05	0.676973	0.223259	0.099758		22_46	0.662757	0.206928	0.130315		22_46	0.675779	0.324221
Kalinago	350	0.015979	0.676626	0.191054	0.11632	1e-05	1e-05			350	0.013534	0.67519	0.190106	1e-05	0.12116		350	189_350	0.011418	0.676615	0.190344	0.121622		189_350	0.675001	0.17679	0.148208		189_350	0.696998	0.303002
Kalinago	193	0.008089	0.676675	0.272608	0.042608	1e-05	1e-05			193	0.008167	0.676593	0.27299	1e-05	0.04224		193	104_193	0.006059	0.677946	0.27339	0.042605		104_193	0.676006	0.254906	0.069088		104_193	0.669779	0.330221
Kalinago	319	1e-05	0.677094	0.189831	0.133046	1e-05	1e-05			319	1e-05	0.674258	0.188528	1e-05	0.137194		319	171_319	1e-05	0.674473	0.188604	0.136914		171_319	0.65764	0.174069	0.16829		171_319	0.685374	0.314626
Kalinago	27	0.012999	0.680545	0.238797	0.066356	0.001293	1e-05			27	0.012353	0.680076	0.238674	0.000585	0.068313		27	36_27	0.011173	0.681155	0.23902	0.068652		36_27	0.684949	0.220463	0.094588		36_27	0.685239	0.314761
Kalinago	181	1e-05	0.681227	0.209505	0.092757	1e-05	0.016491			181	1e-05	0.681139	0.209049	1e-05	0.109792		181	297_181	1e-05	0.681256	0.209128	0.109606		297_181	0.661371	0.193949	0.14468		297_181	0.6796	0.3204
Kalinago	315	0.004435	0.68288	0.248093	0.064572	1e-05	1e-05			315	0.00365	0.68253	0.248102	1e-05	0.065708		315	169_315	0.001102	0.684146	0.24862	0.066132		169_315	0.67469	0.232565	0.092745		169_315	0.675835	0.324165
Kalinago	71	0.074487	0.687118	0.170442	0.060522	0.00742	1e-05			71	0.074579	0.687153	0.171175	0.007086	0.060007		71	34_71	0.078065	0.688118	0.172121	0.061695		34_71	0.756265	0.155782	0.087952		34_71	0.760177	0.239823
Kalinago	438	0.006438	0.687428	0.208191	0.093007	1e-05	0.004926			438	0.005148	0.686689	0.20769	1e-05	0.100464		438	87_438	0.003513	0.687776	0.207989	0.100722		87_438	0.680934	0.193904	0.125162		87_438	0.694441	0.305559
Kalinago	116	1.7e-05	0.687508	0.23181	0.080645	1e-05	1e-05			116	1e-05	0.687009	0.232303	1e-05	0.080668		116	23_116	1e-05	0.687485	0.232421	0.080084		23_116	0.678378	0.214197	0.107426		23_116	0.68285	0.31715
Kalinago	5	1e-05	0.688213	0.216446	0.094621	1e-05	0.000699			5	1e-05	0.686372	0.215389	1e-05	0.09822		5	3_5	1e-05	0.686602	0.215436	0.097952		3_5	0.673507	0.198671	0.127822		3_5	0.685955	0.314045
Kalinago	149	0.025844	0.68918	0.21333	0.068809	1e-05	0.002827			149	0.02492	0.688555	0.212759	1e-05	0.073756		149	82_149	0.022832	0.690002	0.213174	0.073993		82_149	0.705043	0.194756	0.100202		82_149	0.710941	0.289059
Kalinago	392	0.006169	0.690439	0.236755	0.066617	1e-05	1e-05			392	0.005396	0.690218	0.237015	1e-05	0.067361		392	93_392	0.002745	0.691965	0.237496	0.067794		93_392	0.689765	0.219727	0.090508		93_392	0.689369	0.310631
Kalinago	242	0.011216	0.690473	0.208333	0.089958	1e-05	1e-05			242	0.009754	0.689857	0.208208	1e-05	0.092171		242	68_242	0.007049	0.691679	0.208625	0.092647		68_242	0.690419	0.190134	0.119447		68_242	0.702982	0.297018
Kalinago	207	0.022142	0.691948	0.214231	0.068952	0.002718	1e-05			207	0.02151	0.69136	0.214146	0.002243	0.070741		207	39_207	0.021544	0.692327	0.214685	0.071445		39_207	0.704869	0.198551	0.09658		39_207	0.709989	0.290011
Kalinago	13	0.001875	0.693898	0.203699	0.094625	0.00301	0.002892			13	0.000442	0.69308	0.20307	0.002328	0.101079		13	258_13	0.000406	0.693915	0.203621	0.102058		258_13	0.687284	0.185567	0.127148		258_13	0.703098	0.296902
Kalinago	154	0.006768	0.69726	0.231118	0.064835	1e-05	1e-05			154	0.006052	0.696577	0.230947	1e-05	0.066414		154	85_154	0.003941	0.697936	0.231379	0.066744		85_154	0.691296	0.215847	0.092857		85_154	0.69247	0.30753
Kalinago	361	1e-05	0.69779	0.228301	0.072128	0.001762	1e-05			361	1e-05	0.697476	0.228774	0.001103	0.072637		361	89_361	1e-05	0.697937	0.229085	0.072968		89_361	0.683857	0.212824	0.103319		89_361	0.690093	0.309907
Kalinago	419	0.063103	0.698076	0.168086	0.068377	1e-05	0.002349			419	0.062111	0.697497	0.167586	1e-05	0.072796		419	27_419	0.060347	0.699019	0.167805	0.07283		27_419	0.742716	0.150714	0.106569		27_419	0.755655	0.244345
Kalinago	112	1.6e-05	0.698816	0.206397	0.092572	1e-05	0.002189			112	1e-05	0.697038	0.205319	1e-05	0.097623		112	22_112	1e-05	0.697458	0.20541	0.097122		22_112	0.684557	0.188726	0.126717		22_112	0.698243	0.301757
Kalinago	57	1e-05	0.698922	0.227959	0.073087	1e-05	1.2e-05			57	1e-05	0.697361	0.226986	1e-05	0.075633		57	27_57	1e-05	0.697656	0.227134	0.0752		27_57	0.683325	0.209665	0.107009		27_57	0.691383	0.308617
Kalinago	282	0.010429	0.699646	0.250187	0.039718	1e-05	1e-05			282	0.010819	0.699735	0.25089	1e-05	0.038546		282	51_282	0.009244	0.700842	0.251245	0.038669		51_282	0.701156	0.233609	0.065235		51_282	0.695228	0.304772
Kalinago	106	0.024114	0.699968	0.172334	0.102999	0.000575	1e-05			106	0.022274	0.699168	0.171965	1e-05	0.106583		106	56_106	0.020492	0.700469	0.172158	0.10688		56_106	0.713651	0.155049	0.1313		56_106	0.732917	0.267083
Kalinago	453	0.004946	0.700632	0.188108	0.106293	1e-05	1e-05			453	0.002833	0.699581	0.187601	1e-05	0.109975		453	252_453	0.000856	0.700821	0.187919	0.110403		252_453	0.690651	0.170942	0.138407		252_453	0.710343	0.289657
Kalinago	94	1e-05	0.700725	0.218684	0.079863	0.000708	1e-05			94	1e-05	0.699357	0.218132	2.3e-05	0.082477		94	46_94	1e-05	0.699477	0.218259	0.082254		46_94	0.687568	0.201531	0.110901		46_94	0.693518	0.306482
Kalinago	197	0.000463	0.700953	0.212063	0.0865	1e-05	1e-05			197	1.3e-05	0.699695	0.211455	1e-05	0.088828		197	300_197	1e-05	0.699949	0.211557	0.088484		300_197	0.690094	0.194005	0.115901		300_197	0.699878	0.300122
Kalinago	342	0.006739	0.702099	0.193144	0.096146	0.000253	0.001619			342	0.005125	0.701183	0.192561	1e-05	0.101121		342	67_342	0.003832	0.702029	0.192794	0.101345		67_342	0.69446	0.177364	0.128177		67_342	0.710707	0.289293
Kalinago	33	0.159363	0.703009	0.064972	0.052485	0.012348	0.007823			33	0.159538	0.702792	0.064785	0.012191	0.060694		33	7_33	0.166784	0.703922	0.065988	0.063306		7_33	0.85714	0.055117	0.087743		7_33	0.876205	0.123795
Kalinago	171	1e-05	0.707662	0.225355	0.066953	1e-05	1e-05			171	1e-05	0.706425	0.224699	1e-05	0.068856		171	35_171	1e-05	0.706728	0.224783	0.068479		35_171	0.687527	0.208108	0.104364		35_171	0.691009	0.308991
Kalinago	281	0.004389	0.70864	0.194502	0.092448	1e-05	1e-05			281	0.002817	0.707708	0.194057	1e-05	0.095408		281	50_281	0.001273	0.70874	0.194378	0.095608		50_281	0.700681	0.176396	0.122923		50_281	0.714968	0.285032
Kalinago	32	1e-05	0.711168	0.185508	0.103294	1e-05	1e-05			32	1e-05	0.708948	0.184489	1e-05	0.106544		32	15_32	1e-05	0.709496	0.184563	0.105932		15_32	0.694804	0.168079	0.137117		15_32	0.713666	0.286334
Kalinago	351	0.005	0.712502	0.098043	0.156537	1e-05	0.027908			351	0.00513	0.712148	0.097408	1e-05	0.185303		351	190_351	0.003132	0.713434	0.097542	0.185892		190_351	0.704522	0.083231	0.212247		190_351	0.751656	0.248344
Kalinago	431	0.008297	0.713112	0.187814	0.090757	1e-05	1e-05			431	0.007074	0.712278	0.18774	1e-05	0.092898		431	240_431	0.003917	0.714363	0.188218	0.093502		240_431	0.708748	0.172721	0.118531		240_431	0.720597	0.279403
Kalinago	167	0.005518	0.713245	0.234151	0.046652	0.000424	1e-05			167	0.00533	0.71303	0.234256	0.000115	0.047269		167	93_167	0.004103	0.713845	0.234617	0.047435		93_167	0.710602	0.215243	0.074155		93_167	0.706128	0.293872
Kalinago	114	1e-05	0.7136	0.179818	0.106552	1e-05	1e-05			114	1e-05	0.711409	0.178622	1e-05	0.10995		114	62_114	1e-05	0.711662	0.178712	0.109616		62_114	0.69837	0.16335	0.13828		62_114	0.717815	0.282185
Kalinago	269	0.001746	0.715361	0.241899	0.040974	1e-05	1e-05			269	0.002156	0.71539	0.242526	1e-05	0.039918		269	148_269	0.000436	0.716506	0.242915	0.040143		148_269	0.70739	0.224128	0.068482		148_269	0.701516	0.298484
Kalinago	146	0.043774	0.71579	0.18602	0.054396	1e-05	1e-05			146	0.043782	0.715709	0.186683	1e-05	0.053816		146	81_146	0.041995	0.717087	0.186975	0.053943		81_146	0.751187	0.169098	0.079714		81_146	0.752902	0.247098
Kalinago	339	0.01076	0.715828	0.089859	0.155537	1e-05	0.028005			339	0.010471	0.715631	0.089314	1e-05	0.184574		339	183_339	0.007818	0.717487	0.089485	0.185209		183_339	0.714344	0.077073	0.208583		183_339	0.764039	0.235961
Kalinago	323	0.001874	0.719396	0.193362	0.075732	1e-05	0.009627			323	0.001403	0.719205	0.192979	1e-05	0.086402		323	173_323	1e-05	0.720169	0.193303	0.086518		173_323	0.710301	0.176505	0.113194		173_323	0.722281	0.277719
Kalinago	457	1e-05	0.719872	0.189967	0.068268	0.000605	0.021279			457	1e-05	0.720694	0.18989	0.001466	0.087939		457	92_457	1e-05	0.721232	0.190288	0.088469		92_457	0.705929	0.174708	0.119363		92_457	0.719172	0.280828
Kalinago	296	0.001731	0.720453	0.196196	0.065682	0.005643	0.010295			296	0.001783	0.720192	0.195864	0.005626	0.076534		296	53_296	0.00426	0.720765	0.196862	0.078114		53_296	0.714105	0.180192	0.105703		53_296	0.722504	0.277496
Kalinago	134	0.027429	0.72231	0.192985	0.057255	1e-05	1e-05			134	0.026747	0.721827	0.192757	1e-05	0.058659		134	53_134	0.024994	0.72311	0.193067	0.058828		53_134	0.741634	0.174309	0.084058		53_134	0.745101	0.254899
Kalinago	119	0.011975	0.72304	0.174395	0.09057	1e-05	1e-05			119	0.011013	0.722585	0.174679	1e-05	0.091713		119	66_119	0.009648	0.723616	0.174947	0.091789		66_119	0.725259	0.156318	0.118423		66_119	0.737108	0.262892
Kalinago	331	0.008085	0.723565	0.184063	0.083185	1e-05	0.001093			331	0.006559	0.722531	0.183338	1e-05	0.087561		331	85_331	0.004961	0.723546	0.183692	0.087801		85_331	0.719052	0.167118	0.11383		85_331	0.731825	0.268175
Kalinago	370	0.011928	0.725342	0.172533	0.087694	1e-05	0.002493			370	0.01037	0.724369	0.171608	1e-05	0.093643		370	25_370	0.006608	0.726961	0.172176	0.094255		25_370	0.717678	0.157153	0.125169		25_370	0.735288	0.264712
Kalinago	206	0.001088	0.727197	0.179515	0.09218	1e-05	1e-05			206	1e-05	0.72609	0.179057	1e-05	0.094834		206	112_206	1e-05	0.726415	0.179131	0.094444		112_206	0.717174	0.161056	0.12177		112_206	0.732724	0.267276
Kalinago	150	0.011549	0.728443	0.213545	0.046444	1e-05	1e-05			150	0.011039	0.727994	0.213277	1e-05	0.047679		150	83_150	0.008395	0.729753	0.213823	0.048029		83_150	0.724931	0.195178	0.079891		83_150	0.726632	0.273368
Kalinago	170	0.082975	0.728534	0.144404	0.044058	1e-05	1.9e-05			170	0.082407	0.728099	0.144229	1e-05	0.045255		170	96_170	0.080928	0.729553	0.144449	0.045069		96_170	0.798691	0.128755	0.072554		96_170	0.803477	0.196523
Kalinago	399	0.022596	0.729516	0.170528	0.077339	1e-05	1e-05			399	0.020886	0.728828	0.170119	1e-05	0.080158		399	95_399	0.017952	0.730908	0.170607	0.080533		95_399	0.740093	0.154832	0.105075		95_399	0.751604	0.248396
Kalinago	34	1e-05	0.729913	0.195155	0.062535	1e-05	0.012377			34	1e-05	0.730059	0.194927	4e-05	0.074965		34	16_34	1e-05	0.730219	0.195037	0.074734		16_34	0.720739	0.175217	0.104044		16_34	0.727478	0.272522
Kalinago	61	0.003327	0.730523	0.193849	0.056841	0.008785	0.006675			61	0.003192	0.730351	0.193571	0.008664	0.064222		61	29_61	0.007999	0.73065	0.194776	0.066576		29_61	0.727631	0.17648	0.095889		29_61	0.734751	0.265249
Kalinago	14	0.016306	0.730664	0.189748	0.063262	1e-05	1e-05			14	0.015469	0.730014	0.18956	1e-05	0.064946		14	3_14	0.013528	0.731345	0.189905	0.065222		3_14	0.735556	0.172151	0.092293		3_14	0.740805	0.259195
Kalinago	22	0.00872	0.732546	0.225968	0.02942	0.003336	1e-05			22	0.009245	0.73258	0.22642	0.002934	0.028821		22	4_22	0.010005	0.733243	0.22706	0.029692		4_22	0.734247	0.208426	0.057327		4_22	0.726823	0.273177
Kalinago	421	1e-05	0.735894	0.191143	0.072934	1e-05	1e-05			421	1e-05	0.735364	0.1915	1e-05	0.073115		421	230_421	1e-05	0.735681	0.191611	0.072699		230_421	0.71818	0.173701	0.10812		230_421	0.726158	0.273842
Kalinago	127	0.012504	0.736136	0.227519	0.023821	1e-05	1e-05			127	0.013009	0.736371	0.228244	1e-05	0.022366		127	71_127	0.010832	0.737803	0.228704	0.022661		71_127	0.741892	0.209322	0.048786		71_127	0.730832	0.269168
Kalinago	107	0.017031	0.740085	0.216846	0.026018	1e-05	1e-05			107	0.018557	0.740495	0.218354	1e-05	0.022584		107	48_107	0.015135	0.742822	0.218976	0.023067		48_107	0.742118	0.202158	0.055724		48_107	0.735598	0.264402
Kalinago	387	1e-05	0.741707	0.195464	0.062799	1e-05	1e-05			387	1e-05	0.740552	0.195021	1e-05	0.064408		387	208_387	1e-05	0.740857	0.195165	0.063968		208_387	0.731071	0.177799	0.09113		208_387	0.733557	0.266443
Kalinago	298	1e-05	0.747828	0.160261	0.077983	0.000955	0.012963			298	1e-05	0.747636	0.159908	0.000973	0.091473		298	79_298	1e-05	0.748139	0.16019	0.091661		79_298	0.736855	0.143919	0.119226		79_298	0.754088	0.245912
Kalinago	291	0.006646	0.748332	0.198109	0.041714	1e-05	0.005189			291	0.006821	0.748055	0.197842	1e-05	0.047272		291	160_291	0.004581	0.749534	0.198264	0.047621		160_291	0.743343	0.181683	0.074973		160_291	0.741712	0.258288
Kalinago	424	0.00381	0.749438	0.18362	0.058767	0.004356	1e-05			424	0.003957	0.749315	0.18428	0.003779	0.05867		424	233_424	0.005358	0.749907	0.185073	0.059662		233_424	0.73968	0.16911	0.09121		233_424	0.746172	0.253828
Kalinago	420	1e-05	0.752351	0.15903	0.083827	0.001042	0.00374			420	1e-05	0.751319	0.1585	0.000128	0.090043		420	229_420	1e-05	0.751482	0.15864	0.089868		229_420	0.736448	0.142678	0.120873		229_420	0.751945	0.248055
Kalinago	117	0.013657	0.752518	0.206172	0.027633	1e-05	1e-05			117	0.014413	0.752675	0.207057	1e-05	0.025845		117	64_117	0.01236	0.754034	0.207475	0.026131		64_117	0.759109	0.188695	0.052196		64_117	0.752588	0.247412
Kalinago	137	0.015347	0.752794	0.172534	0.050112	1e-05	0.009202			137	0.015643	0.75284	0.172338	1e-05	0.059169		137	74_137	0.01398	0.753997	0.172627	0.059396		74_137	0.756752	0.15425	0.088997		74_137	0.762813	0.237187
Kalinago	173	0.012623	0.755529	0.190842	0.040986	1e-05	1e-05			173	0.01226	0.755423	0.191012	1e-05	0.041295		173	97_173	0.009542	0.757246	0.191477	0.041735		97_173	0.758691	0.172578	0.068731		97_173	0.75817	0.24183
Kalinago	162	0.000361	0.756882	0.16371	0.067348	0.003723	0.007977			162	0.00018	0.756535	0.163304	0.003434	0.076546		162	90_162	0.001168	0.757221	0.164035	0.077575		90_162	0.743089	0.147472	0.109439		90_162	0.757027	0.242973
Kalinago	166	0.008049	0.759257	0.175834	0.054075	1e-05	0.002775			166	0.007477	0.758886	0.175496	1e-05	0.058131		166	92_166	0.006116	0.759759	0.175835	0.05829		92_166	0.757298	0.156625	0.086077		92_166	0.761826	0.238174
Kalinago	318	1e-05	0.759571	0.146618	0.089108	0.004683	1e-05			318	1e-05	0.758131	0.146124	0.00374	0.091996		318	64_318	1e-05	0.759352	0.146949	0.093689		64_318	0.747984	0.130868	0.121148		64_318	0.763487	0.236513
Kalinago	307	0.005079	0.760467	0.195032	0.039402	1e-05	1e-05			307	0.004774	0.760231	0.195067	1e-05	0.039918		307	81_307	0.00277	0.761551	0.195498	0.040182		81_307	0.755023	0.175456	0.069522		81_307	0.754488	0.245512
Kalinago	178	0.001163	0.763894	0.20018	0.032936	0.001816	1e-05			178	0.001163	0.76367	0.200216	0.001691	0.03326		178	10_178	0.000956	0.764376	0.200764	0.033904		10_178	0.758479	0.182312	0.059209		10_178	0.752399	0.247601
Kalinago	168	0.080431	0.764031	0.100374	0.054278	0.000876	1e-05			168	0.079931	0.763423	0.100143	0.000369	0.056134		168	94_168	0.078889	0.764682	0.100208	0.056221		94_168	0.833692	0.084386	0.081922		94_168	0.844148	0.155852
Kalinago	16	1e-05	0.765063	0.153057	0.063963	1e-05	0.017897			16	1e-05	0.765761	0.153033	1e-05	0.081186		16	8_16	1e-05	0.766014	0.153121	0.080856		8_16	0.747926	0.137455	0.114619		8_16	0.763388	0.236612
Kalinago	277	0.009228	0.768227	0.180855	0.041669	1e-05	1e-05			277	0.008813	0.767832	0.180754	1e-05	0.042591		277	261_277	0.00719	0.768913	0.181125	0.042772		261_277	0.767743	0.164852	0.067405		261_277	0.767419	0.232581
Kalinago	62	1e-05	0.768324	0.192656	0.03899	1e-05	1e-05			62	1e-05	0.768536	0.193385	1e-05	0.038058		62	5_62	1e-05	0.76887	0.193559	0.037562		5_62	0.744062	0.17807	0.077869		5_62	0.743692	0.256308
Kalinago	138	0.018103	0.768489	0.125323	0.086483	0.001592	1e-05			138	0.017201	0.76766	0.125304	0.000732	0.089103		138	75_138	0.016104	0.768731	0.125599	0.089566		75_138	0.772524	0.1099	0.117576		75_138	0.792593	0.207407
Kalinago	275	0.00411	0.769022	0.170735	0.053855	0.002268	1e-05			275	0.003919	0.768457	0.170646	0.001819	0.055159		275	151_275	0.003673	0.769319	0.171167	0.05584		151_275	0.769013	0.151614	0.079374		151_275	0.771089	0.228911
Kalinago	91	1e-05	0.769322	0.148147	0.079633	0.002878	1e-05			91	1e-05	0.768192	0.147803	0.001845	0.08215		91	45_91	1e-05	0.768932	0.148172	0.082885		45_91	0.754819	0.130473	0.114709		45_91	0.77114	0.22886
Kalinago	377	0.01766	0.770766	0.18804	0.022985	1e-05	0.000538			377	0.017536	0.770603	0.187862	1e-05	0.02399		377	76_377	0.01613	0.771519	0.188228	0.024123		76_377	0.777031	0.171041	0.051928		76_377	0.769941	0.230059
Kalinago	371	0.019242	0.775325	0.118068	0.076825	0.004287	0.006253			371	0.018421	0.774969	0.117522	0.003978	0.085109		371	73_371	0.020013	0.775731	0.118173	0.086083		73_371	0.783813	0.101525	0.114662		73_371	0.804404	0.195596
Kalinago	232	0.012736	0.775828	0.154173	0.057244	1e-05	1e-05			232	0.011573	0.775279	0.153803	1e-05	0.059335		232	15_232	0.00949	0.776731	0.154157	0.059622		15_232	0.777543	0.135017	0.08744		15_232	0.78618	0.21382
Kalinago	355	0.003843	0.776167	0.094926	0.125043	1e-05	1e-05			355	0.001482	0.775074	0.094993	1e-05	0.128441		355	192_355	1e-05	0.776344	0.095222	0.128424		192_355	0.765741	0.080124	0.154135		192_355	0.796194	0.203806
Kalinago	38	1e-05	0.777529	0.161464	0.05994	0.001047	1e-05			38	1e-05	0.776737	0.161137	0.000472	0.061644		38	19_38	1e-05	0.776952	0.161351	0.061688		19_38	0.760655	0.144399	0.094946		19_38	0.76716	0.23284
Kalinago	18	0.000453	0.78037	0.143111	0.06555	0.00372	0.006796			18	0.000163	0.780062	0.142841	0.003475	0.073459		18	260_18	0.001347	0.78062	0.143581	0.074452		260_18	0.770459	0.127269	0.102272		260_18	0.78195	0.21805
Kalinago	26	0.02443	0.783607	0.147741	0.044202	1e-05	1e-05			26	0.02474	0.783602	0.148601	1e-05	0.043047		26	5_26	0.02262	0.785087	0.148932	0.043361		5_26	0.796433	0.133322	0.070245		5_26	0.79821	0.20179
Kalinago	85	0.009831	0.786677	0.139953	0.059344	0.004185	1e-05			85	0.009258	0.786125	0.139995	0.003654	0.060968		85	19_85	0.010311	0.786896	0.140734	0.062059		19_85	0.789939	0.124546	0.085515		19_85	0.795795	0.204205
Kalinago	11	0.12122	0.78733	0.053555	0.033513	0.004373	1e-05			11	0.121219	0.787293	0.053945	0.003741	0.033802		11	6_11	0.122794	0.78851	0.054267	0.03443		6_11	0.896597	0.043025	0.060378		6_11	0.907321	0.092679
Kalinago	2	0.014121	0.787727	0.124704	0.056547	1e-05	0.016891			2	0.015368	0.787963	0.124692	1e-05	0.071967		2	1_2	0.013721	0.789175	0.124968	0.072136		1_2	0.789541	0.110268	0.100191		1_2	0.802808	0.197192
Kalinago	186	0.003563	0.793117	0.143215	0.038939	1e-05	0.021156			186	0.005614	0.793774	0.143322	1e-05	0.05728		186	101_186	0.00346	0.795175	0.14368	0.057684		101_186	0.784198	0.128361	0.08744		101_186	0.792162	0.207838
Kalinago	376	1e-05	0.793485	0.169665	0.03682	1e-05	1e-05			376	1e-05	0.793108	0.169599	1e-05	0.037273		376	75_376	1e-05	0.79364	0.169822	0.036528		75_376	0.776534	0.151478	0.071988		75_376	0.77715	0.22285
Kalinago	365	0.028096	0.793665	0.136833	0.041385	1e-05	1e-05			365	0.027908	0.793407	0.137005	1e-05	0.04167		365	198_365	0.025651	0.795	0.137324	0.042025		198_365	0.809498	0.120479	0.070023		198_365	0.812686	0.187314
Kalinago	66	0.019322	0.796268	0.149914	0.032761	1e-05	0.001726			66	0.019158	0.796017	0.149698	1e-05	0.035117		66	31_66	0.017337	0.797233	0.150032	0.035397		31_66	0.801471	0.135656	0.062873		31_66	0.802031	0.197969
Kalinago	369	0.010019	0.796982	0.123249	0.061113	1e-05	0.008627			369	0.009692	0.796782	0.122919	1e-05	0.070597		369	90_369	0.007286	0.798446	0.123272	0.070995		90_369	0.79442	0.10701	0.098571		90_369	0.808618	0.191382
Kalinago	163	0.002422	0.797076	0.164234	0.036247	1e-05	1e-05			163	0.002389	0.797054	0.164678	1e-05	0.035869		163	9_163	1e-05	0.798688	0.165183	0.036119		9_163	0.788197	0.148567	0.063236		9_163	0.787543	0.212457
Kalinago	271	0.007629	0.799009	0.15672	0.033716	1e-05	0.002915			271	0.007592	0.798834	0.156597	1e-05	0.036968		271	149_271	0.006103	0.79985	0.156961	0.037086		149_271	0.796508	0.138299	0.065193		149_271	0.797002	0.202998
Kalinago	160	0.01675	0.799537	0.152582	0.031112	1e-05	1e-05			160	0.01696	0.799372	0.152874	1e-05	0.030784		160	56_160	0.015414	0.800515	0.153175	0.030896		56_160	0.808931	0.134262	0.056808		56_160	0.805928	0.194072
Kalinago	123	0.019993	0.800887	0.11504	0.064059	1e-05	1e-05			123	0.018554	0.800118	0.114339	1e-05	0.066979		123	24_123	0.016013	0.801925	0.114752	0.06731		24_123	0.806644	0.09835	0.095006		24_123	0.821413	0.178587
Kalinago	101	0.007152	0.802114	0.154457	0.035713	0.000554	1e-05			101	0.006939	0.801796	0.154368	0.000213	0.036685		101	47_101	0.005822	0.802657	0.154711	0.036811		47_101	0.799441	0.13536	0.065199		47_101	0.800991	0.199009
Kalinago	82	0.015022	0.802162	0.146208	0.036588	1e-05	1e-05			82	0.014709	0.80165	0.146004	1e-05	0.037627		82	42_82	0.012423	0.803214	0.146409	0.037954		42_82	0.805829	0.127158	0.067012		42_82	0.806335	0.193665
Kalinago	86	0.007042	0.803112	0.138452	0.051133	0.000251	1e-05			86	0.007203	0.802946	0.139091	1e-05	0.050751		86	44_86	0.005752	0.803819	0.139353	0.051076		44_86	0.795784	0.124606	0.07961		44_86	0.800968	0.199032
Kalinago	412	0.005824	0.807249	0.126861	0.049558	1e-05	0.010497			412	0.006108	0.807245	0.12664	1e-05	0.059997		412	84_412	0.003947	0.808716	0.127048	0.060289		84_412	0.797533	0.1119	0.090566		84_412	0.808858	0.191142
Kalinago	109	0.011596	0.811578	0.126227	0.050579	1e-05	1e-05			109	0.011591	0.811405	0.126881	1e-05	0.050113		109	58_109	0.008674	0.813424	0.127368	0.050533		58_109	0.813396	0.110171	0.076433		58_109	0.817955	0.182045
Kalinago	272	0.014519	0.811995	0.15419	0.017255	1e-05	0.002032			272	0.014935	0.811761	0.154065	1e-05	0.019229		272	75_272	0.012967	0.813168	0.154538	0.019327		75_272	0.81575	0.135548	0.048702		75_272	0.809911	0.190089
Kalinago	246	0.006145	0.815729	0.115945	0.058006	0.004165	1e-05			246	0.005399	0.815469	0.115993	0.003502	0.059636		246	70_246	0.006607	0.816129	0.116628	0.060637		70_246	0.814481	0.099846	0.085673		70_246	0.82353	0.17647
Kalinago	388	0.01838	0.81994	0.128823	0.032837	1e-05	1e-05			388	0.018179	0.819791	0.128918	1e-05	0.033102		388	209_388	0.01566	0.821473	0.129364	0.033502		209_388	0.826753	0.112597	0.06065		209_388	0.828937	0.171063
Kalinago	29	0.016554	0.820468	0.080712	0.082246	1e-05	1e-05			29	0.015207	0.819753	0.080668	1e-05	0.084363		29	13_29	0.013645	0.82083	0.080878	0.084647		13_29	0.819574	0.069635	0.110792		13_29	0.842259	0.157741
Kalinago	455	0.022269	0.823552	0.05658	0.097579	1e-05	1e-05			455	0.020063	0.822596	0.056117	1e-05	0.101214		455	254_455	0.018859	0.823576	0.056219	0.101346		254_455	0.828461	0.046255	0.125284		254_455	0.86027	0.13973
Kalinago	353	0.00477	0.826949	0.057333	0.104818	0.006121	1e-05			353	0.003455	0.826207	0.05724	0.004966	0.108132		353	191_353	0.005744	0.82677	0.057822	0.109663		191_353	0.819414	0.046472	0.134114		191_353	0.850267	0.149733
Kalinago	241	0.0179	0.82702	0.094258	0.058427	1e-05	0.002385			241	0.016789	0.82657	0.093808	1e-05	0.062823		241	134_241	0.015348	0.827669	0.094055	0.062927		134_241	0.832287	0.077085	0.090627		134_241	0.84864	0.15136
Kalinago	23	0.020676	0.842859	0.087339	0.049107	1e-05	1e-05			23	0.019778	0.842362	0.087178	1e-05	0.050672		23	289_23	0.018306	0.843412	0.087412	0.05087		289_23	0.844577	0.07342	0.082003		289_23	0.858242	0.141758
Kalinago	4	0.015625	0.845908	0.12982	0.007513	0.001125	1e-05			4	0.016293	0.846026	0.130049	0.000828	0.006804		4	2_4	0.015787	0.846787	0.130498	0.006927		2_4	0.848883	0.111383	0.039734		2_4	0.844972	0.155028
Kalinago	180	0.012698	0.84694	0.06288	0.072071	0.003693	0.001719			180	0.011546	0.846196	0.062587	0.003076	0.076595		180	296_180	0.012514	0.846882	0.063138	0.077466		296_180	0.842344	0.050594	0.107062		296_180	0.867662	0.132338
Kalinago	172	0.021141	0.868785	0.075322	0.031712	0.00303	1e-05			172	0.021035	0.868645	0.075572	0.002642	0.032106		172	58_172	0.021845	0.869389	0.076095	0.032671		58_172	0.874471	0.06153	0.063999		58_172	0.884875	0.115125
Kalinago	368	0.034542	0.890145	0.053915	0.021378	1e-05	1e-05			368	0.034829	0.890256	0.054518	1e-05	0.020387		368	262_368	0.032529	0.892022	0.054831	0.020618		262_368	0.910158	0.042224	0.047618		262_368	0.916533	0.083467
								1								1							1					1
Nat. American	SUR_843	1e-05	0.999948	1.02222e-05	1.08889e-05	1e-05	1.03333e-05			SUR_843	1e-05	0.999957	1.17778e-05	1.12222e-05	1e-05		843	SUR_843	1e-05	0.99997	1e-05	1.02222e-05		SUR_843	0.99998	1e-05	1.04444e-05		SUR_843	0.99999	1e-05
Nat. American	SUR_849	1.04444e-05	0.999948	1e-05	1.03333e-05	1e-05	1.07778e-05			SUR_849	1e-05	0.999959	1e-05	1.05556e-05	1e-05		849	SUR_849	1e-05	0.999969	1.03333e-05	1.05556e-05		SUR_849	0.99998	1e-05	1e-05		SUR_849	0.99999	1e-05
Nat. American	SUR_837	1e-05	0.999949	1e-05	1.03333e-05	1e-05	1.07778e-05			SUR_837	1.01111e-05	0.999959	1e-05	1.1e-05	1e-05		837	SUR_837	1e-05	0.99997	1e-05	1e-05		SUR_837	0.999978	1e-05	1.18889e-05		SUR_837	0.99999	1e-05
Nat. American	SUR_852	1e-05	0.999949	1e-05	1.02222e-05	1e-05	1.04444e-05			SUR_852	1.11111e-05	0.999958	1e-05	1.1e-05	1e-05		852	SUR_852	1.04444e-05	0.99997	1e-05	1e-05		SUR_852	0.999979	1e-05	1.06667e-05		SUR_852	0.99999	1e-05
Nat. American	SUR_838	1e-05	0.99995	1e-05	1e-05	1e-05	1.04444e-05			SUR_838	1.02222e-05	0.99996	1e-05	1.02222e-05	1e-05		838	SUR_838	1.08889e-05	0.999969	1.02222e-05	1e-05		SUR_838	0.999979	1e-05	1.1e-05		SUR_838	0.99999	1e-05
Nat. American	SUR_845	1e-05	0.99995	1e-05	1e-05	1e-05	1.03333e-05			SUR_845	1.11111e-05	0.999958	1e-05	1.05556e-05	1e-05		845	SUR_845	1.07778e-05	0.999969	1e-05	1.01111e-05		SUR_845	0.999979	1e-05	1.08889e-05		SUR_845	0.99999	1e-05
Nat. American	SUR_846	1e-05	0.99995	1.03333e-05	1e-05	1e-05	1e-05			SUR_846	1.01111e-05	0.99996	1e-05	1.02222e-05	1e-05		846	SUR_846	1.01111e-05	0.99997	1e-05	1e-05		SUR_846	0.999979	1e-05	1.05556e-05		SUR_846	0.99999	1e-05
Nat. American	SUR_832	1e-05	0.99995	1e-05	1e-05	1e-05	1.02222e-05			SUR_832	1.01111e-05	0.999958	1.05556e-05	1.1e-05	1e-05		832	SUR_832	1e-05	0.999968	1.08889e-05	1.06667e-05		SUR_832	0.999979	1e-05	1.05556e-05		SUR_832	0.99999	1e-05
Nat. American	KAR_1009	0.0238896	0.97607	1e-05	1e-05	1e-05	1e-05			KAR_1009	0.0240359	0.975933	1e-05	1.06667e-05	1e-05		1009	KAR_1009	0.0226826	0.977296	1.08889e-05	1.07778e-05		KAR_1009	0.994355	1e-05	0.00563533		KAR_1009	0.99999	1e-05
Nat. American	KAR_1013	1e-05	0.999948	1.03333e-05	1.1e-05	1e-05	1.04444e-05			KAR_1013	1.02222e-05	0.99996	1e-05	1e-05	1e-05		1013	KAR_1013	1e-05	0.99997	1.02222e-05	1.01111e-05		KAR_1013	0.999979	1e-05	1.06667e-05		KAR_1013	0.99999	1e-05
Nat. American	KAR_1014	1.06667e-05	0.999949	1e-05	1e-05	1e-05	1.06667e-05			KAR_1014	1.07778e-05	0.999959	1e-05	1.06667e-05	1e-05		1014	KAR_1014	1e-05	0.999969	1e-05	1.06667e-05		KAR_1014	0.99998	1e-05	1e-05		KAR_1014	0.99999	1e-05
Nat. American	KAR_1001	1e-05	0.999949	1e-05	1.04444e-05	1e-05	1.05556e-05			KAR_1001	1.05556e-05	0.999959	1e-05	1.01111e-05	1e-05		1001	KAR_1001	1.05556e-05	0.999969	1.02222e-05	1.02222e-05		KAR_1001	0.999979	1e-05	1.06667e-05		KAR_1001	0.99999	1e-05
Nat. American	KAR_998	1.08889e-05	0.999949	1e-05	1e-05	1e-05	1e-05			KAR_998	1.02222e-05	0.999958	1.03333e-05	1.1e-05	1e-05		998	KAR_998	1.01111e-05	0.99997	1.02222e-05	1.01111e-05		KAR_998	0.99998	1e-05	1e-05		KAR_998	0.99999	1e-05
Nat. American	KAR_1018	1e-05	0.999949	1e-05	1.03333e-05	1e-05	1.04444e-05			KAR_1018	1.18889e-05	0.999957	1e-05	1.12222e-05	1e-05		1018	KAR_1018	1e-05	0.99997	1e-05	1.03333e-05		KAR_1018	0.99998	1e-05	1e-05		KAR_1018	0.99999	1e-05
Nat. American	KAR_995	1.06667e-05	0.999949	1e-05	1e-05	1e-05	1e-05			KAR_995	1.04444e-05	0.999959	1e-05	1.06667e-05	1e-05		995	KAR_995	1.08889e-05	0.999969	1e-05	1.02222e-05		KAR_995	0.999979	1e-05	1.06667e-05		KAR_995	0.99999	1e-05
Nat. American	KAR_1006	1e-05	0.999949	1e-05	1e-05	1e-05	1.06667e-05			KAR_1006	1.01111e-05	0.99996	1e-05	1.01111e-05	1e-05		1006	KAR_1006	1.02222e-05	0.99997	1e-05	1.02222e-05		KAR_1006	0.999979	1e-05	1.1e-05		KAR_1006	0.99999	1e-05
Nat. American	KAR_999	1e-05	0.999949	1e-05	1e-05	1e-05	1.05556e-05			KAR_999	1.06667e-05	0.999959	1e-05	1.02222e-05	1e-05		999	KAR_999	1.1e-05	0.999969	1.02222e-05	1e-05		KAR_999	0.999979	1e-05	1.13333e-05		KAR_999	0.99999	1e-05
Nat. American	KAR_1012	1e-05	0.999949	1e-05	1e-05	1e-05	1.05556e-05			KAR_1012	1.03333e-05	0.999959	1e-05	1.08889e-05	1e-05		1012	KAR_1012	1.03333e-05	0.999969	1e-05	1.06667e-05		KAR_1012	0.99998	1e-05	1.04444e-05		KAR_1012	0.99999	1e-05
Nat. American	KAR_1019	1.01111e-05	0.999949	1e-05	1e-05	1e-05	1.05556e-05			KAR_1019	1.01111e-05	0.99996	1e-05	1e-05	1e-05		1019	KAR_1019	1.03333e-05	0.999969	1.02222e-05	1e-05		KAR_1019	0.99998	1e-05	1e-05		KAR_1019	0.99999	1e-05
Nat. American	KAR_1010	1e-05	0.99995	1e-05	1.02222e-05	1e-05	1e-05			KAR_1010	1.01111e-05	0.999959	1.02222e-05	1.06667e-05	1e-05		1010	KAR_1010	1e-05	0.99997	1e-05	1.01111e-05		KAR_1010	0.99998	1e-05	1.04444e-05		KAR_1010	0.99999	1e-05
Nat. American	KAR_1003	1e-05	0.99995	1e-05	1e-05	1e-05	1.01111e-05			KAR_1003	1.03333e-05	0.999959	1e-05	1.02222e-05	1e-05		1003	KAR_1003	1.04444e-05	0.99997	1e-05	1e-05		KAR_1003	0.999978	1e-05	1.2e-05		KAR_1003	0.99999	1e-05
Nat. American	KAR_1015	1e-05	0.99995	1e-05	1e-05	1e-05	1e-05			KAR_1015	1.08889e-05	0.999959	1e-05	1e-05	1e-05		1015	KAR_1015	1e-05	0.99997	1.04444e-05	1e-05		KAR_1015	0.99998	1e-05	1e-05		KAR_1015	0.99999	1e-05
Nat. American	MAYA_860	0.0483329	0.611985	0.0370003	0.23895	1e-05	0.063722			MAYA_860	0.0507777	0.612629	0.0367451	1e-05	0.299838		860	MAYA_860	0.0490131	0.614243	0.0365822	0.300161		MAYA_860	0.652866	0.0282141	0.31892		MAYA_860	0.737943	0.262057
Nat. American	MAYA_876	0.0587611	0.649645	0.0124269	0.241172	1e-05	0.0379851			MAYA_876	0.057488	0.649454	0.0118742	1e-05	0.281173		876	MAYA_876	0.0555103	0.651241	0.0115851	0.281663		MAYA_876	0.696132	0.00760456	0.296264		MAYA_876	0.781387	0.218613
Nat. American	MAYA_871	0.0465233	0.660486	0.0179561	0.232905	0.00152944	0.0405999			MAYA_871	0.0459309	0.660123	0.0175094	0.00151378	0.274923		871	MAYA_871	0.0451949	0.661575	0.0173822	0.275848		MAYA_871	0.693916	0.014637	0.291447		MAYA_871	0.777181	0.222819
Nat. American	MAYA_869	0.0619142	0.746607	0.0138513	0.150651	1e-05	0.0269667			MAYA_869	0.0614858	0.746438	0.0134914	1e-05	0.178575		869	MAYA_869	0.059389	0.748239	0.0134994	0.178873		MAYA_869	0.793527	0.00880856	0.197664		MAYA_869	0.853292	0.146708
Nat. American	MAYA_861	0.0563436	0.748639	0.0316671	0.123485	0.00826556	0.0315994			MAYA_861	0.0570352	0.748994	0.0314283	0.008787	0.153755		861	MAYA_861	0.0614677	0.749943	0.0321877	0.156402		MAYA_861	0.79821	0.0242001	0.17759		MAYA_861	0.85021	0.14979
Nat. American	MAYA_868	0.0687056	0.763939	0.0367953	0.0977183	1e-05	0.0328318			MAYA_868	0.070621	0.764471	0.0366253	1e-05	0.128273		868	MAYA_868	0.0680696	0.766634	0.0367317	0.128565		MAYA_868	0.823497	0.0263958	0.150107		MAYA_868	0.866729	0.133271
Nat. American	MAYA_877	0.0729758	0.795804	1e-05	0.107566	1e-05	0.0236348			MAYA_877	0.073204	0.795736	1e-05	1e-05	0.13104		877	MAYA_877	0.0709193	0.797786	1e-05	0.131285		MAYA_877	0.851767	1e-05	0.148223		MAYA_877	0.904993	0.0950066
Nat. American	MAYA_862	0.0683386	0.818795	1e-05	0.0838589	1e-05	0.0289872			MAYA_862	0.070049	0.819402	1e-05	1e-05	0.110529		862	MAYA_862	0.0686433	0.820845	1e-05	0.110502		MAYA_862	0.870478	1e-05	0.129512		MAYA_862	0.919207	0.0807932
Nat. American	MAYA_875	0.0612718	0.821189	0.034804	0.0485894	1e-05	0.0341357			MAYA_875	0.0648862	0.822402	0.0350716	1e-05	0.0776306		875	MAYA_875	0.0635373	0.823743	0.0350531	0.0776661		MAYA_875	0.870074	0.0260179	0.103908		MAYA_875	0.900662	0.0993382
Nat. American	MAYA_863	0.0643524	0.827793	0.0439359	0.0420669	0.00143889	0.0204123			MAYA_863	0.0657718	0.828423	0.0438804	0.00203011	0.0598943		863	MAYA_863	0.0658042	0.829608	0.0441223	0.0604658		MAYA_863	0.878854	0.0335419	0.0876042		MAYA_863	0.902689	0.0973114
Nat. American	MAYA_854	0.0692326	0.834218	0.00721133	0.0805508	1.15556e-05	0.00877611			MAYA_854	0.0679544	0.83391	0.00695544	1e-05	0.0911696		854	MAYA_854	0.0665028	0.835255	0.00702933	0.091213		MAYA_854	0.882097	0.00601867	0.111884		MAYA_854	0.923113	0.0768874
Nat. American	MAYA_858	0.0668237	0.856544	1e-05	0.0543799	0.00584222	0.0163999			MAYA_858	0.0674662	0.85681	1e-05	0.00595044	0.0697631		858	MAYA_858	0.0708212	0.85749	1e-05	0.071679		MAYA_858	0.909808	1e-05	0.0901821		MAYA_858	0.951734	0.0482659
Nat. American	MAYA_870	0.0757891	0.857182	1e-05	0.058896	0.000899333	0.00722322			MAYA_870	0.0753186	0.856912	1e-05	0.000688	0.0670712		870	MAYA_870	0.074628	0.858135	1e-05	0.0672274		MAYA_870	0.912552	1e-05	0.087438		MAYA_870	0.953048	0.0469516
Nat. American	MAYA_872	0.0618036	0.857884	1e-05	0.0433608	0.0120539	0.0248879			MAYA_872	0.0638808	0.858722	1e-05	0.0125039	0.0648828		872	MAYA_872	0.0717936	0.859067	2.67778e-05	0.069113		MAYA_872	0.913624	0.00371089	0.0826652		MAYA_872	0.947443	0.0525567
Nat. American	MAYA_859	0.0589921	0.86025	0.0105483	0.0413983	0.00183822	0.026973			MAYA_859	0.0612696	0.861188	0.0106424	0.00260289	0.064297		859	MAYA_859	0.061921	0.862339	0.01094	0.0647996		MAYA_859	0.905302	0.00763467	0.0870634		MAYA_859	0.936671	0.0633288
Nat. American	MAYA_856	0.074633	0.864153	1e-05	0.0311374	1e-05	0.030056			MAYA_856	0.0779961	0.865409	1e-05	1e-05	0.0565752		856	MAYA_856	0.0768323	0.866646	1e-05	0.0565116		MAYA_856	0.9205	1e-05	0.0794904		MAYA_856	0.960165	0.0398348
Nat. American	MAYA_864	0.0735757	0.864749	1e-05	0.0248062	1e-05	0.0368493			MAYA_864	0.0782577	0.866436	1e-05	1e-05	0.0552859		864	MAYA_864	0.0764607	0.868136	1e-05	0.0553934		MAYA_864	0.921421	1e-05	0.0785691		MAYA_864	0.95887	0.0411298
Nat. American	MAYA_865	0.0720419	0.8804	0.00672922	0.0342131	1e-05	0.00660611			MAYA_865	0.072016	0.880405	0.00661167	1e-05	0.0409576		865	MAYA_865	0.0703203	0.881974	0.00674244	0.0409633		MAYA_865	0.931357	0.00513911	0.0635039		MAYA_865	0.957252	0.042748
Nat. American	MAYA_855	0.0947789	0.888386	1e-05	0.00216089	0.000350889	0.0143136			MAYA_855	0.0964343	0.889167	1e-05	0.000715444	0.0136731		855	MAYA_855	0.0961046	0.890332	1e-05	0.0135532		MAYA_855	0.962187	1e-05	0.037803		MAYA_855	0.987825	0.0121747
Nat. American	MAYA_873	0.0499824	0.896039	1e-05	0.0238043	0.00475933	0.0254046			MAYA_873	0.0526801	0.896983	1e-05	0.00571933	0.0446072		873	MAYA_873	0.0559858	0.897522	1e-05	0.0464824		MAYA_873	0.928422	1e-05	0.0715684		MAYA_873	0.961113	0.0388866
Nat. American	MAYA_857	0.0740886	0.908468	1e-05	1e-05	0.000780444	0.0166427			MAYA_857	0.077503	0.909456	1e-05	0.00171578	0.011315		857	MAYA_857	0.0777051	0.910544	1e-05	0.0117407		MAYA_857	0.959399	1e-05	0.0405906		MAYA_857	0.98574	0.0142604
Nat. American	PIMA_1058	0.0710743	0.861479	1e-05	0.0582372	0.00147167	0.00772744			PIMA_1058	0.0708884	0.861377	1e-05	0.000981667	0.0667428		1058	PIMA_1058	0.0704741	0.862624	1e-05	0.0668921		PIMA_1058	0.907292	1e-05	0.092698		PIMA_1058	0.947805	0.0521952
Nat. American	PIMA_1055	0.0724447	0.868129	1e-05	0.0485936	1e-05	0.0108126			PIMA_1055	0.0724551	0.868223	1e-05	1e-05	0.0593018		1055	PIMA_1055	0.0703038	0.870114	1e-05	0.0595721		PIMA_1055	0.916584	1e-05	0.0834061		PIMA_1055	0.952688	0.047312
Nat. American	PIMA_1060	0.0807812	0.874611	1e-05	0.0378282	0.00192433	0.00484522			PIMA_1060	0.0806821	0.874415	1e-05	0.00151656	0.0433761		1060	PIMA_1060	0.0804747	0.8757	1e-05	0.0438154		PIMA_1060	0.927795	1e-05	0.0721954		PIMA_1060	0.964908	0.035092
Nat. American	PIMA_1051	0.0842499	0.875088	1e-05	0.00769778	1e-05	0.0329446			PIMA_1051	0.0884803	0.876596	1e-05	1e-05	0.0349038		1051	PIMA_1051	0.0867473	0.8784	1e-05	0.0348424		PIMA_1051	0.939444	1e-05	0.0605463		PIMA_1051	0.971718	0.028282
Nat. American	PIMA_1037	0.0790552	0.886311	1e-05	0.0259918	1e-05	0.00862222			PIMA_1037	0.0794868	0.886532	1e-05	1e-05	0.0339612		1037	PIMA_1037	0.0780789	0.887958	1e-05	0.0339528		PIMA_1037	0.939922	1e-05	0.0600681		PIMA_1037	0.972668	0.0273322
Nat. American	PIMA_1059	0.0840447	0.887742	1e-05	0.00741956	0.00155522	0.0192287			PIMA_1059	0.0861631	0.88869	1e-05	0.00239856	0.0227388		1059	PIMA_1059	0.0868434	0.889764	1e-05	0.0233821		PIMA_1059	0.943232	1e-05	0.0567576		PIMA_1059	0.979227	0.0207734
Nat. American	PIMA_1050	0.0511606	0.895922	1e-05	0.0382998	1e-05	0.0145982			PIMA_1050	0.0522146	0.896308	1e-05	1e-05	0.0514574		1050	PIMA_1050	0.0510008	0.897537	1e-05	0.0514522		PIMA_1050	0.922824	1e-05	0.0771664		PIMA_1050	0.961701	0.0382993
Nat. American	PIMA_1047	0.0850009	0.914927	1e-05	1e-05	4.21111e-05	1e-05			PIMA_1047	0.0850751	0.91489	1e-05	1.51111e-05	1e-05		1047	PIMA_1047	0.0841811	0.915799	1e-05	1e-05		PIMA_1047	0.970765	1e-05	0.0292249		PIMA_1047	0.994209	0.00579133
Nat. American	PIMA_1057	0.0835874	0.916372	1e-05	1.08889e-05	1e-05	1e-05			PIMA_1057	0.0836368	0.916333	1e-05	1e-05	1e-05		1057	PIMA_1057	0.0819278	0.918052	1e-05	1e-05		PIMA_1057	0.966164	1e-05	0.0338257		PIMA_1057	0.992232	0.00776756
Nat. American	PIMA_1053	0.0692463	0.930714	1e-05	1e-05	1e-05	1e-05			PIMA_1053	0.069232	0.930738	1e-05	1e-05	1e-05		1053	PIMA_1053	0.0678942	0.932086	1e-05	1e-05		PIMA_1053	0.975533	1e-05	0.0244571		PIMA_1053	0.99999	1e-05
Nat. American	PIMA_1041	0.0682651	0.931695	1e-05	1.01111e-05	1e-05	1e-05			PIMA_1041	0.068211	0.931759	1e-05	1e-05	1e-05		1041	PIMA_1041	0.0671027	0.932877	1e-05	1e-05		PIMA_1041	0.970026	1e-05	0.0299643		PIMA_1041	0.991545	0.00845489
Nat. American	PIMA_1044	0.0583516	0.941608	1e-05	1e-05	1e-05	1e-05			PIMA_1044	0.0583866	0.941583	1e-05	1e-05	1e-05		1044	PIMA_1044	0.0568903	0.94309	1e-05	1e-05		PIMA_1044	0.982134	1e-05	0.0178563		PIMA_1044	0.99999	1e-05
Nat. American	PIMA_1043	0.0509848	0.948975	1e-05	1e-05	1e-05	1e-05			PIMA_1043	0.0509384	0.949032	1e-05	1e-05	1e-05		1043	PIMA_1043	0.0488169	0.951163	1e-05	1e-05		PIMA_1043	0.985344	1e-05	0.0146457		PIMA_1043	0.99999	1e-05
Nat. American	PIMA_1056	0.0473989	0.95256	1e-05	1e-05	1e-05	1.07778e-05			PIMA_1056	0.0473874	0.952582	1.02222e-05	1e-05	1e-05		1056	PIMA_1056	0.0451376	0.954842	1e-05	1e-05		PIMA_1056	0.989066	1e-05	0.0109237		PIMA_1056	0.99999	1e-05
Nat American	COL_703	0.0416773	0.823263	0.0486122	0.07903	1e-05	0.007408			COL_703	0.040581	0.822837	0.0481417	1e-05	0.0884306		703	COL_703	0.0385141	0.824513	0.0483131	0.0886602		COL_703	0.847716	0.0363619	0.115922		COL_703	0.878708	0.121292
Nat American	COL_970	0.0267254	0.973235	1e-05	1e-05	1e-05	1e-05			COL_970	0.0267711	0.973199	1e-05	1e-05	1e-05		970	COL_970	0.0263047	0.973674	1e-05	1.11111e-05		COL_970	0.987295	1e-05	0.0126952		COL_970	0.99999	1e-05
Nat American	COL_704	0.0262652	0.973695	1e-05	1e-05	1e-05	1e-05			COL_704	0.0262911	0.973678	1e-05	1.1e-05	1e-05		704	COL_704	0.0255019	0.974478	1e-05	1e-05		COL_704	0.987754	1e-05	0.0122363		COL_704	0.99999	1e-05
Nat American	COL_702	0.0187793	0.981181	1e-05	1e-05	1e-05	1e-05			COL_702	0.0188032	0.981167	1e-05	1e-05	1e-05		702	COL_702	0.0168238	0.983156	1.04444e-05	1e-05		COL_702	0.990141	1e-05	0.00984922		COL_702	0.99999	1e-05
Nat American	COL_710	0.0148604	0.9851	1e-05	1e-05	1e-05	1e-05			COL_710	0.0149861	0.984984	1e-05	1e-05	1e-05		710	COL_710	0.0119988	0.987981	1e-05	1.03333e-05		COL_710	0.996319	1e-05	0.00367122		COL_710	0.99999	1e-05
Nat American	COL_706	0.008217	0.991743	1e-05	1e-05	1e-05	1e-05			COL_706	0.00819078	0.991779	1e-05	1.01111e-05	1e-05		706	COL_706	0.00630656	0.993673	1e-05	1e-05		COL_706	0.999132	1e-05	0.000857556		COL_706	0.99999	1e-05
Nat American	COL_708	0.00417856	0.995781	1e-05	1e-05	1e-05	1e-05			COL_708	0.00433133	0.995639	1e-05	1e-05	1e-05		708	COL_708	0.002191	0.997789	1e-05	1e-05		COL_708	0.994015	1e-05	0.00597478		COL_708	0.99999	1e-05
								1								1							1					1
Oceanian	MEL_662	0.246871	1e-05	1e-05	1e-05	0.753089	1e-05			MEL_662	0.245511	1e-05	1e-05	0.754459	1e-05		662	MEL_662	0.718503	1e-05	0.0868903	0.194597		MEL_662	0.703582	0.0961632	0.200255		MEL_662	0.747628	0.252372
Oceanian	MEL_655	0.229673	1e-05	1e-05	1e-05	0.770287	1e-05			MEL_655	0.228789	1e-05	1e-05	0.771181	1e-05		655	MEL_655	0.713767	1e-05	0.0862933	0.19993		MEL_655	0.696998	0.0947104	0.208292		MEL_655	0.74334	0.25666
Oceanian	MEL_664	0.227811	1e-05	1.01111e-05	1e-05	0.772148	1.07778e-05			MEL_664	0.226579	1e-05	1e-05	0.773391	1e-05		664	MEL_664	0.714694	1e-05	0.0802468	0.205049		MEL_664	0.700636	0.0881989	0.211165		MEL_664	0.748035	0.251965
Oceanian	MEL_656	0.227007	1e-05	1e-05	1e-05	0.772953	1e-05			MEL_656	0.225903	1e-05	1e-05	0.774067	1e-05		656	MEL_656	0.709956	1e-05	0.0882871	0.201747		MEL_656	0.69538	0.0971238	0.207496		MEL_656	0.741203	0.258797
Oceanian	MEL_1027	0.222999	1e-05	1.02222e-05	1e-05	0.77696	1.04444e-05			MEL_1027	0.222017	1e-05	1e-05	0.777953	1e-05		1027	MEL_1027	0.704053	1e-05	0.0900826	0.205854		MEL_1027	0.687337	0.0984079	0.214255		MEL_1027	0.734571	0.265429
Oceanian	MEL_661	0.220984	1e-05	1e-05	1e-05	0.778976	1e-05			MEL_661	0.220002	1e-05	1e-05	0.779968	1e-05		661	MEL_661	0.707533	1e-05	0.0789533	0.213504		MEL_661	0.695875	0.0866527	0.217473		MEL_661	0.744772	0.255228
Oceanian	MEL_491	0.212824	1e-05	1e-05	1e-05	0.787136	1e-05			MEL_491	0.211961	1e-05	1e-05	0.788009	1e-05		491	MEL_491	0.716687	1e-05	0.0866307	0.196672		MEL_491	0.702411	0.0950282	0.202561		MEL_491	0.746725	0.253275
Oceanian	MEL_788	0.205433	1e-05	1e-05	1e-05	0.794527	1e-05			MEL_788	0.204335	1e-05	1e-05	0.795635	1e-05		788	MEL_788	0.701359	1e-05	0.0863559	0.212275		MEL_788	0.686875	0.0947064	0.218418		MEL_788	0.735225	0.264775
Oceanian	MEL_787	0.20104	1e-05	1e-05	1e-05	0.79892	1e-05			MEL_787	0.200234	1e-05	1e-05	0.799736	1e-05		787	MEL_787	0.704482	1e-05	0.0849704	0.210538		MEL_787	0.688999	0.0931794	0.217822		MEL_787	0.737534	0.262466
Oceanian	MEL_663	0.195341	1e-05	1.01111e-05	1.02222e-05	0.804619	1e-05			MEL_663	0.194265	1.02222e-05	1e-05	0.805705	1e-05		663	MEL_663	0.705845	1e-05	0.088354	0.205791		MEL_663	0.691185	0.0964811	0.212333		MEL_663	0.73785	0.26215
Oceanian	PAP_544	0.206883	1e-05	1e-05	1.01111e-05	0.793077	1e-05			PAP_544	0.206372	1e-05	1e-05	0.793598	1e-05		544	PAP_544	0.719776	1e-05	0.0846127	0.195601		PAP_544	0.70274	0.0932299	0.20403		PAP_544	0.747508	0.252492
Oceanian	PAP_546	1.01111e-05	1e-05	1.15556e-05	1e-05	0.999948	1.07778e-05			PAP_546	1e-05	1.04444e-05	1e-05	0.99996	1e-05		546	PAP_546	0.647395	1e-05	0.108256	0.244339		PAP_546	0.629837	0.117021	0.253142		PAP_546	0.683684	0.316316
Oceanian	PAP_540	1.01111e-05	1e-05	1e-05	1.16667e-05	0.999948	1e-05			PAP_540	1e-05	1e-05	1e-05	0.99996	1e-05		540	PAP_540	0.651756	1e-05	0.115511	0.232722		PAP_540	0.636349	0.124068	0.239582		PAP_540	0.68664	0.31336
Oceanian	PAP_555	1.07778e-05	1e-05	1.06667e-05	1e-05	0.999949	1e-05			PAP_555	1.11111e-05	1e-05	1e-05	0.999959	1e-05		555	PAP_555	0.645228	1e-05	0.108601	0.246161		PAP_555	0.629914	0.117198	0.252888		PAP_555	0.683817	0.316183
Oceanian	PAP_545	1e-05	1e-05	1.11111e-05	1e-05	0.999949	1e-05			PAP_545	1.04444e-05	1e-05	1e-05	0.99996	1e-05		545	PAP_545	0.649706	1e-05	0.110305	0.23998		PAP_545	0.631163	0.119308	0.249529		PAP_545	0.68446	0.31554
Oceanian	PAP_551	1e-05	1e-05	1e-05	1.11111e-05	0.999949	1e-05			PAP_551	1.04444e-05	1.07778e-05	1e-05	0.999959	1e-05		551	PAP_551	0.656807	1e-05	0.106015	0.237168		PAP_551	0.637781	0.115616	0.246603		PAP_551	0.690552	0.309448
Oceanian	PAP_553	1e-05	1e-05	1.05556e-05	1e-05	0.999949	1.04444e-05			PAP_553	1.16667e-05	1.11111e-05	1e-05	0.999957	1e-05		553	PAP_553	0.655155	1e-05	0.106316	0.238519		PAP_553	0.636953	0.11494	0.248107		PAP_553	0.690001	0.309999
Oceanian	PAP_548	1e-05	1e-05	1.06667e-05	1e-05	0.999949	1.02222e-05			PAP_548	1e-05	1.15556e-05	1e-05	0.999958	1e-05		548	PAP_548	0.654217	1e-05	0.111072	0.234701		PAP_548	0.638636	0.120036	0.241328		PAP_548	0.689863	0.310137
Oceanian	PAP_552	1e-05	1e-05	1.07778e-05	1e-05	0.999949	1e-05			PAP_552	1e-05	1.05556e-05	1e-05	0.999959	1e-05		552	PAP_552	0.649854	1e-05	0.113665	0.23647		PAP_552	0.634403	0.122118	0.243479		PAP_552	0.685762	0.314238
Oceanian	PAP_556	1e-05	1e-05	1.05556e-05	1e-05	0.999949	1e-05			PAP_556	1.23333e-05	1.03333e-05	1e-05	0.999957	1e-05		556	PAP_556	0.649869	1e-05	0.110955	0.239166		PAP_556	0.63503	0.119095	0.245875		PAP_556	0.687324	0.312676
Oceanian	PAP_542	1.04444e-05	1e-05	1e-05	1e-05	0.99995	1e-05			PAP_542	1e-05	1e-05	1e-05	0.99996	1e-05		542	PAP_542	0.649286	1e-05	0.110228	0.240476		PAP_542	0.632782	0.119124	0.248094		PAP_542	0.685591	0.314409
Oceanian	PAP_550	1e-05	1e-05	1e-05	1e-05	0.99995	1.04444e-05			PAP_550	1.04444e-05	1e-05	1.02222e-05	0.999959	1e-05		550	PAP_550	0.659316	1e-05	0.108705	0.231969		PAP_550	0.64274	0.117322	0.239938		PAP_550	0.693736	0.306264
Oceanian	PAP_547	1e-05	1e-05	1.03333e-05	1e-05	0.99995	1e-05			PAP_547	1.1e-05	1.2e-05	1e-05	0.999957	1e-05		547	PAP_547	0.663639	1e-05	0.106154	0.230196		PAP_547	0.644911	0.115195	0.239894		PAP_547	0.696194	0.303806
Oceanian	PAP_554	1.01111e-05	1e-05	1e-05	1e-05	0.99995	1e-05			PAP_554	1.26667e-05	1e-05	1e-05	0.999957	1e-05		554	PAP_554	0.651827	1e-05	0.105931	0.242231		PAP_554	0.635922	0.114621	0.249458		PAP_554	0.689409	0.310591
Oceanian	PAP_541	1e-05	1e-05	1e-05	1e-05	0.99995	1e-05			PAP_541	1.06667e-05	1e-05	1e-05	0.999959	1e-05		541	PAP_541	0.656468	1e-05	0.106116	0.237405		PAP_541	0.638884	0.115492	0.245624		PAP_541	0.691519	0.308481
Oceanian	PAP_543	1e-05	1e-05	1e-05	1e-05	0.99995	1e-05			PAP_543	1e-05	1.03333e-05	1e-05	0.99996	1e-05		543	PAP_543	0.660888	1e-05	0.1087	0.230402		PAP_543	0.64435	0.117752	0.237898		PAP_543	0.694964	0.305036
Oceanian	PAP_549	1e-05	1e-05	1e-05	1e-05	0.99995	1e-05			PAP_549	1.32222e-05	1e-05	1e-05	0.999957	1e-05		549	PAP_549	0.652419	1e-05	0.11147	0.236102		PAP_549	0.634969	0.120106	0.244926		PAP_549	0.686961	0.313039
								1								1							1					1
E. Asian	MIA_1198	0.984966	1e-05	1e-05	1e-05	0.014994	1e-05			MIA_1198	0.985689	1.13333e-05	1e-05	0.0142793	1e-05		1198	MIA_1198	0.99997	1e-05	1e-05	1e-05		MIA_1198	0.999979	1e-05	1.06667e-05		MIA_1198	0.99999	1e-05
E. Asian	MIA_1189	0.986847	1e-05	1.01111e-05	1e-05	0.013113	1e-05			MIA_1189	0.987317	1.12222e-05	1e-05	0.0126514	1e-05		1189	MIA_1189	0.99997	1e-05	1e-05	1e-05		MIA_1189	0.99998	1e-05	1e-05		MIA_1189	0.99999	1e-05
E. Asian	MIA_1194	0.986926	0.004374	1e-05	1.04444e-05	0.00866944	1e-05			MIA_1194	0.987559	0.00457056	1e-05	0.00785056	1e-05		1194	MIA_1194	0.992719	0.00726067	1.06667e-05	1e-05		MIA_1194	0.99998	1e-05	1e-05		MIA_1194	0.99999	1e-05
E. Asian	MIA_1190	0.989181	1e-05	1.1e-05	1e-05	0.0107784	1e-05			MIA_1190	0.989925	1.11111e-05	1e-05	0.0100437	1e-05		1190	MIA_1190	0.99997	1e-05	1e-05	1e-05		MIA_1190	0.99998	1e-05	1e-05		MIA_1190	0.99999	1e-05
E. Asian	MIA_1192	0.994715	1e-05	1e-05	1e-05	0.005245	1e-05			MIA_1192	0.995294	1.04444e-05	1e-05	0.00467511	1e-05		1192	MIA_1192	0.99997	1e-05	1e-05	1e-05		MIA_1192	0.99998	1e-05	1e-05		MIA_1192	0.99999	1e-05
E. Asian	MIA_1195	0.994827	1e-05	1.01111e-05	1e-05	0.00513322	1e-05			MIA_1195	0.995534	1e-05	1e-05	0.00443644	1e-05		1195	MIA_1195	0.999865	0.000115333	1e-05	1e-05		MIA_1195	0.99998	1e-05	1e-05		MIA_1195	0.99999	1e-05
E. Asian	MIA_1191	0.998711	1e-05	1.01111e-05	1e-05	0.001249	1.03333e-05			MIA_1191	0.999461	1.02222e-05	1e-05	0.000508889	1e-05		1191	MIA_1191	0.99997	1e-05	1.04444e-05	1e-05		MIA_1191	0.99998	1e-05	1e-05		MIA_1191	0.99999	1e-05
E. Asian	MIA_1196	0.999157	1e-05	1e-05	1e-05	0.000803333	1e-05			MIA_1196	0.999959	1e-05	1e-05	1.04444e-05	1e-05		1196	MIA_1196	0.99997	1e-05	1e-05	1e-05		MIA_1196	0.99998	1e-05	1e-05		MIA_1196	0.99999	1e-05
E. Asian	MIA_1193	0.999948	1e-05	1e-05	1e-05	1e-05	1.15556e-05			MIA_1193	0.99996	1.01111e-05	1e-05	1.01111e-05	1e-05		1193	MIA_1193	0.999969	1.07778e-05	1e-05	1e-05		MIA_1193	0.99998	1e-05	1e-05		MIA_1193	0.99999	1e-05
E. Asian	MIA_1197	0.99995	1e-05	1e-05	1e-05	1e-05	1e-05			MIA_1197	0.999959	1e-05	1e-05	1.13333e-05	1e-05		1197	MIA_1197	0.99997	1e-05	1e-05	1e-05		MIA_1197	0.99998	1e-05	1e-05		MIA_1197	0.99999	1e-05
E. Asian	SHE_1336	0.993179	1e-05	1e-05	1.02222e-05	0.00678	1.04444e-05			SHE_1336	0.994037	1.08889e-05	1e-05	0.005932	1e-05		1336	SHE_1336	0.99997	1e-05	1e-05	1e-05		SHE_1336	0.99998	1e-05	1e-05		SHE_1336	0.99999	1e-05
E. Asian	SHE_1331	0.993233	1e-05	1.02222e-05	1.05556e-05	0.00672511	1.07778e-05			SHE_1331	0.994061	1.06667e-05	1e-05	0.00590811	1e-05		1331	SHE_1331	0.999969	1.04444e-05	1.01111e-05	1e-05		SHE_1331	0.99998	1.04444e-05	1e-05		SHE_1331	0.99999	1e-05
E. Asian	SHE_1335	0.997828	1e-05	1.04444e-05	1e-05	0.00213144	1e-05			SHE_1335	0.999032	1e-05	1e-05	0.000937444	1e-05		1335	SHE_1335	0.999969	1.11111e-05	1e-05	1e-05		SHE_1335	0.99998	1e-05	1e-05		SHE_1335	0.99999	1e-05
E. Asian	SHE_1334	0.998169	1e-05	1.01111e-05	1e-05	0.00179067	1e-05			SHE_1334	0.999112	1.02222e-05	1e-05	0.000858111	1e-05		1334	SHE_1334	0.99997	1.02222e-05	1e-05	1e-05		SHE_1334	0.99998	1e-05	1e-05		SHE_1334	0.99999	1e-05
E. Asian	SHE_1327	0.999559	1e-05	1.1e-05	1e-05	0.000399778	1e-05			SHE_1327	0.999959	1e-05	1e-05	1.13333e-05	1e-05		1327	SHE_1327	0.99997	1.01111e-05	1e-05	1e-05		SHE_1327	0.99998	1e-05	1e-05		SHE_1327	0.99999	1e-05
E. Asian	SHE_1332	0.999949	1e-05	1.01111e-05	1.13333e-05	1e-05	1e-05			SHE_1332	0.999959	1.05556e-05	1e-05	1e-05	1e-05		1332	SHE_1332	0.99997	1e-05	1.01111e-05	1e-05		SHE_1332	0.99998	1e-05	1e-05		SHE_1332	0.99999	1e-05
E. Asian	SHE_1333	0.999949	1.07778e-05	1.06667e-05	1e-05	1e-05	1e-05			SHE_1333	0.999959	1e-05	1e-05	1.07778e-05	1e-05		1333	SHE_1333	0.99997	1e-05	1e-05	1e-05		SHE_1333	0.99998	1e-05	1e-05		SHE_1333	0.99999	1e-05
E. Asian	SHE_1329	0.99995	1e-05	1.04444e-05	1e-05	1e-05	1e-05			SHE_1329	0.999959	1e-05	1e-05	1.07778e-05	1e-05		1329	SHE_1329	0.99997	1e-05	1e-05	1e-05		SHE_1329	0.99998	1e-05	1e-05		SHE_1329	0.99999	1e-05
E. Asian	SHE_1328	0.99995	1e-05	1.01111e-05	1e-05	1e-05	1e-05			SHE_1328	0.99996	1e-05	1e-05	1e-05	1e-05		1328	SHE_1328	0.99997	1e-05	1e-05	1.02222e-05		SHE_1328	0.99998	1e-05	1e-05		SHE_1328	0.99999	1e-05
E. Asian	SHE_1330	0.99995	1e-05	1e-05	1e-05	1e-05	1e-05			SHE_1330	0.99996	1.02222e-05	1e-05	1.02222e-05	1e-05		1330	SHE_1330	0.999969	1e-05	1.07778e-05	1e-05		SHE_1330	0.99998	1e-05	1e-05		SHE_1330	0.99999	1e-05
E. Asian	TUJ_1100	0.990556	1e-05	1e-05	1.1e-05	0.00940244	1.02222e-05			TUJ_1100	0.991409	1.11111e-05	1e-05	0.00856022	1e-05		1100	TUJ_1100	0.99997	1e-05	1e-05	1e-05		TUJ_1100	0.99998	1e-05	1e-05		TUJ_1100	0.99999	1e-05
E. Asian	TUJ_1097	0.993249	1e-05	1e-05	1e-05	0.006711	1e-05			TUJ_1097	0.994095	1.11111e-05	1e-05	0.00587378	1e-05		1097	TUJ_1097	0.99997	1e-05	1e-05	1e-05		TUJ_1097	0.99998	1e-05	1e-05		TUJ_1097	0.99999	1e-05
E. Asian	TUJ_1095	0.993424	1e-05	1e-05	1e-05	0.00653567	1e-05			TUJ_1095	0.994343	1.12222e-05	1e-05	0.00562589	1e-05		1095	TUJ_1095	0.99997	1e-05	1e-05	1e-05		TUJ_1095	0.99998	1e-05	1e-05		TUJ_1095	0.99999	1e-05
E. Asian	TUJ_1102	0.995555	1e-05	1e-05	1e-05	0.004405	1e-05			TUJ_1102	0.996315	1.05556e-05	1e-05	0.00365433	1e-05		1102	TUJ_1102	0.99997	1e-05	1e-05	1e-05		TUJ_1102	0.99998	1e-05	1e-05		TUJ_1102	0.99999	1e-05
E. Asian	TUJ_1098	0.995809	1e-05	1.14444e-05	1e-05	0.00414911	1.01111e-05			TUJ_1098	0.99644	1.13333e-05	1e-05	0.00352844	1e-05		1098	TUJ_1098	0.99997	1e-05	1e-05	1e-05		TUJ_1098	0.99998	1e-05	1e-05		TUJ_1098	0.99999	1e-05
E. Asian	TUJ_1099	0.996802	0.00315789	1e-05	1e-05	1e-05	1e-05			TUJ_1099	0.997342	0.00262756	1e-05	1.03333e-05	1e-05		1099	TUJ_1099	0.99441	0.00556944	1.03333e-05	1e-05		TUJ_1099	0.99998	1e-05	1e-05		TUJ_1099	0.99999	1e-05
E. Asian	TUJ_1096	0.997187	1e-05	1e-05	1e-05	0.002773	1.03333e-05			TUJ_1096	0.998111	1.05556e-05	1e-05	0.00185822	1e-05		1096	TUJ_1096	0.998614	0.001366	1e-05	1e-05		TUJ_1096	0.99998	1e-05	1e-05		TUJ_1096	0.99999	1e-05
E. Asian	TUJ_1104	0.999949	1e-05	1e-05	1.07778e-05	1e-05	1e-05			TUJ_1104	0.999959	1.03333e-05	1e-05	1.1e-05	1e-05		1104	TUJ_1104	0.99997	1e-05	1e-05	1e-05		TUJ_1104	0.99998	1e-05	1e-05		TUJ_1104	0.99999	1e-05
E. Asian	TUJ_1103	0.999949	1e-05	1e-05	1.05556e-05	1e-05	1e-05			TUJ_1103	0.999958	1e-05	1e-05	1.16667e-05	1e-05		1103	TUJ_1103	0.99997	1.01111e-05	1e-05	1e-05		TUJ_1103	0.99998	1e-05	1e-05		TUJ_1103	0.99999	1e-05
E. Asian	TUJ_1101	0.99995	1e-05	1e-05	1e-05	1e-05	1e-05			TUJ_1101	0.999959	1e-05	1e-05	1.12222e-05	1e-05		1101	TUJ_1101	0.99997	1e-05	1.02222e-05	1e-05		TUJ_1101	0.99998	1e-05	1e-05		TUJ_1101	0.99999	1e-05
E. Asian	HAN_777	0.974848	0.00997856	1e-05	0.00143511	0.00335044	0.0103774			HAN_777	0.977621	0.0102768	1e-05	0.003193	0.00889856		777	HAN_777	0.978395	0.0142214	1e-05	0.00737333		HAN_777	0.989942	1e-05	0.010048		HAN_777	0.99999	1e-05
E. Asian	HAN_821	0.985231	1e-05	1e-05	1.07778e-05	0.0147276	1.05556e-05			HAN_821	0.986089	1.12222e-05	1e-05	0.0138801	1e-05		821	HAN_821	0.99997	1e-05	1e-05	1e-05		HAN_821	0.99998	1e-05	1e-05		HAN_821	0.99999	1e-05
E. Asian	HAN_784	0.985425	1e-05	1e-05	0.00668311	0.00376444	0.00410778			HAN_784	0.986679	1e-05	1e-05	0.00344033	0.00986078		784	HAN_784	0.990371	1e-05	1e-05	0.00960911		HAN_784	0.987063	1e-05	0.0129273		HAN_784	0.996561	0.00343911
E. Asian	HAN_812	0.987397	1e-05	1e-05	1.01111e-05	0.0125629	1e-05			HAN_812	0.98806	1.05556e-05	1e-05	0.0119098	1e-05		812	HAN_812	0.99997	1e-05	1e-05	1e-05		HAN_812	0.999979	1e-05	1.05556e-05		HAN_812	0.99999	1e-05
E. Asian	HAN_783	0.988713	0.0112462	1e-05	1e-05	1e-05	1.06667e-05			HAN_783	0.98913	0.0108386	1e-05	1.12222e-05	1e-05		783	HAN_783	0.986739	0.0132412	1e-05	1e-05		HAN_783	0.999979	1e-05	1.08889e-05		HAN_783	0.99999	1e-05
E. Asian	HAN_975	0.989724	1e-05	1e-05	1e-05	0.0102358	1e-05			HAN_975	0.990554	1.1e-05	1e-05	0.00941456	1e-05		975	HAN_975	0.99997	1e-05	1e-05	1e-05		HAN_975	0.99998	1e-05	1e-05		HAN_975	0.99999	1e-05
E. Asian	HAN_1023	0.99279	0.00716956	1e-05	1e-05	1e-05	1e-05			HAN_1023	0.993028	0.00694178	1e-05	1e-05	1e-05		1023	HAN_1023	0.990482	0.00949811	1e-05	1e-05		HAN_1023	0.99998	1e-05	1e-05		HAN_1023	0.99999	1e-05
E. Asian	HAN_817	0.992973	1e-05	1e-05	1.01111e-05	0.00698578	1.16667e-05			HAN_817	0.993636	1.04444e-05	1e-05	0.00633389	1e-05		817	HAN_817	0.99997	1e-05	1e-05	1e-05		HAN_817	0.99998	1e-05	1e-05		HAN_817	0.99999	1e-05
E. Asian	HAN_820	0.993665	1e-05	1e-05	1.05556e-05	0.00629411	1.03333e-05			HAN_820	0.994546	1.11111e-05	1e-05	0.00542278	1e-05		820	HAN_820	0.99997	1e-05	1e-05	1e-05		HAN_820	0.99998	1e-05	1e-05		HAN_820	0.99999	1e-05
E. Asian	HAN_974	0.993829	1e-05	1e-05	1e-05	0.00613144	1e-05			HAN_974	0.994763	1.1e-05	1e-05	0.005206	1e-05		974	HAN_974	0.99997	1e-05	1e-05	1e-05		HAN_974	0.99998	1e-05	1e-05		HAN_974	0.99999	1e-05
E. Asian	HAN_781	0.994297	1e-05	1.04444e-05	1.03333e-05	0.005662	1.05556e-05			HAN_781	0.995104	1.12222e-05	1e-05	0.00486433	1e-05		781	HAN_781	0.99997	1e-05	1.01111e-05	1e-05		HAN_781	0.998944	0.00104556	1e-05		HAN_781	0.99999	1e-05
E. Asian	HAN_785	0.994436	1e-05	1e-05	1e-05	0.00552433	1e-05			HAN_785	0.995136	1.1e-05	1e-05	0.00483333	1e-05		785	HAN_785	0.99997	1e-05	1e-05	1e-05		HAN_785	0.99998	1e-05	1e-05		HAN_785	0.99999	1e-05
E. Asian	HAN_776	0.99467	1e-05	1e-05	1e-05	0.00529044	1e-05			HAN_776	0.995541	1.1e-05	1e-05	0.00442844	1e-05		776	HAN_776	0.99997	1e-05	1e-05	1e-05		HAN_776	0.99998	1e-05	1e-05		HAN_776	0.99999	1e-05
E. Asian	HAN_814	0.995941	0.00389089	1e-05	1e-05	0.000138	1e-05			HAN_814	0.997575	0.00239456	1e-05	1.07778e-05	1e-05		814	HAN_814	0.995868	0.00411044	1.15556e-05	1e-05		HAN_814	0.99998	1e-05	1e-05		HAN_814	0.99999	1e-05
E. Asian	HAN_782	0.996743	0.001888	1e-05	1e-05	0.00133922	1e-05			HAN_782	0.998008	0.00165022	1e-05	0.000321889	1e-05		782	HAN_782	0.995563	0.00441667	1e-05	1e-05		HAN_782	0.99998	1e-05	1e-05		HAN_782	0.99999	1e-05
E. Asian	HAN_971	0.99736	1e-05	1e-05	1e-05	0.00259789	1.16667e-05			HAN_971	0.998048	1.01111e-05	1e-05	0.00192156	1e-05		971	HAN_971	0.999795	0.000184556	1e-05	1e-05		HAN_971	0.99998	1e-05	1e-05		HAN_971	0.99999	1e-05
E. Asian	HAN_780	0.997723	0.00124089	1e-05	1e-05	0.00100544	1.06667e-05			HAN_780	0.998807	0.000989111	1e-05	0.000183667	1e-05		780	HAN_780	0.996903	0.00307678	1e-05	1e-05		HAN_780	0.99998	1e-05	1e-05		HAN_780	0.99999	1e-05
E. Asian	HAN_819	0.998122	1e-05	1e-05	1e-05	0.00183833	1e-05			HAN_819	0.99901	1.03333e-05	1e-05	0.000959333	1e-05		819	HAN_819	0.99997	1.01111e-05	1e-05	1e-05		HAN_819	0.99998	1e-05	1e-05		HAN_819	0.99999	1e-05
E. Asian	HAN_818	0.998953	1e-05	1e-05	1e-05	0.00100656	1.07778e-05			HAN_818	0.999955	1e-05	1e-05	1.54444e-05	1e-05		818	HAN_818	0.999969	1e-05	1.06667e-05	1e-05		HAN_818	0.99998	1e-05	1e-05		HAN_818	0.99999	1e-05
E. Asian	HAN_774	0.999811	1e-05	1e-05	1e-05	0.000148778	1e-05			HAN_774	0.999959	1.01111e-05	1e-05	1.13333e-05	1e-05		774	HAN_774	0.99997	1e-05	1e-05	1e-05		HAN_774	0.99998	1e-05	1e-05		HAN_774	0.99999	1e-05
E. Asian	HAN_1024	0.999948	1.14444e-05	1.02222e-05	1.02222e-05	1e-05	1e-05			HAN_1024	0.999957	1.06667e-05	1e-05	1.21111e-05	1e-05		1024	HAN_1024	0.99997	1e-05	1e-05	1e-05		HAN_1024	0.99998	1e-05	1e-05		HAN_1024	0.99999	1e-05
E. Asian	HAN_811	0.999948	1e-05	1.05556e-05	1.1e-05	1e-05	1e-05			HAN_811	0.99996	1.03333e-05	1e-05	1e-05	1e-05		811	HAN_811	0.999969	1e-05	1.02222e-05	1.07778e-05		HAN_811	0.99998	1e-05	1e-05		HAN_811	0.99999	1e-05
E. Asian	HAN_1021	0.999949	1e-05	1.06667e-05	1e-05	1e-05	1.05556e-05			HAN_1021	0.999958	1.01111e-05	1e-05	1.21111e-05	1e-05		1021	HAN_1021	0.99997	1e-05	1e-05	1e-05		HAN_1021	0.99998	1e-05	1e-05		HAN_1021	0.99999	1e-05
E. Asian	HAN_976	0.999949	1.01111e-05	1.02222e-05	1.06667e-05	1e-05	1e-05			HAN_976	0.999959	1.05556e-05	1e-05	1.08889e-05	1e-05		976	HAN_976	0.999968	1.11111e-05	1.07778e-05	1e-05		HAN_976	0.99998	1e-05	1e-05		HAN_976	0.99999	1e-05
E. Asian	HAN_972	0.999949	1e-05	1.06667e-05	1.02222e-05	1e-05	1e-05			HAN_972	0.99996	1.03333e-05	1e-05	1e-05	1e-05		972	HAN_972	0.999969	1e-05	1.08889e-05	1e-05		HAN_972	0.99998	1e-05	1e-05		HAN_972	0.99999	1e-05
E. Asian	HAN_822	0.99995	1e-05	1e-05	1.03333e-05	1e-05	1.01111e-05			HAN_822	0.99996	1e-05	1e-05	1e-05	1e-05		822	HAN_822	0.99997	1e-05	1e-05	1e-05		HAN_822	0.99998	1e-05	1e-05		HAN_822	0.99999	1e-05
E. Asian	HAN_775	0.99995	1e-05	1.02222e-05	1.01111e-05	1e-05	1e-05			HAN_775	0.99996	1e-05	1e-05	1e-05	1e-05		775	HAN_775	0.99997	1e-05	1.02222e-05	1e-05		HAN_775	0.99998	1e-05	1e-05		HAN_775	0.99999	1e-05
E. Asian	HAN_786	0.99995	1.03333e-05	1e-05	1e-05	1e-05	1e-05			HAN_786	0.999958	1.04444e-05	1.05556e-05	1.1e-05	1e-05		786	HAN_786	0.999969	1e-05	1.06667e-05	1e-05		HAN_786	0.99998	1e-05	1e-05		HAN_786	0.99999	1e-05
E. Asian	HAN_973	0.99995	1e-05	1.01111e-05	1.02222e-05	1e-05	1e-05			HAN_973	0.999958	1.08889e-05	1e-05	1.08889e-05	1e-05		973	HAN_973	0.99997	1e-05	1.02222e-05	1e-05		HAN_973	0.999979	1e-05	1.1e-05		HAN_973	0.99999	1e-05
E. Asian	HAN_779	0.99995	1e-05	1.02222e-05	1e-05	1e-05	1e-05			HAN_779	0.999959	1e-05	1e-05	1.06667e-05	1e-05		779	HAN_779	0.999969	1.07778e-05	1e-05	1e-05		HAN_779	0.99998	1e-05	1e-05		HAN_779	0.99999	1e-05
E. Asian	HAN_778	0.99995	1e-05	1e-05	1e-05	1e-05	1e-05			HAN_778	0.99996	1e-05	1e-05	1e-05	1e-05		778	HAN_778	0.999969	1.08889e-05	1e-05	1e-05		HAN_778	0.999979	1.05556e-05	1e-05		HAN_778	0.99999	1e-05
E. Asian	HAN_813	0.99995	1e-05	1e-05	1e-05	1e-05	1e-05			HAN_813	0.999959	1e-05	1e-05	1.07778e-05	1e-05		813	HAN_813	0.999968	1.1e-05	1.1e-05	1e-05		HAN_813	0.99998	1e-05	1e-05		HAN_813	0.99999	1e-05
E. Asian	HAN_815	0.99995	1e-05	1e-05	1e-05	1e-05	1e-05			HAN_815	0.99996	1e-05	1.01111e-05	1e-05	1e-05		815	HAN_815	0.999969	1e-05	1.07778e-05	1e-05		HAN_815	0.99998	1.02222e-05	1e-05		HAN_815	0.99999	1e-05
E. Asian	HAN_977	0.99995	1e-05	1e-05	1e-05	1e-05	1e-05			HAN_977	0.99996	1.03333e-05	1e-05	1.01111e-05	1e-05		977	HAN_977	0.999969	1e-05	1.07778e-05	1e-05		HAN_977	0.99998	1e-05	1e-05		HAN_977	0.99999	1e-05
E. Asian	JAP_762	0.968068	0.0259286	1.02222e-05	1e-05	0.00597289	1e-05			JAP_762	0.969217	0.0255528	1e-05	0.00521044	1e-05		762	JAP_762	0.971416	0.0285636	1e-05	1e-05		JAP_762	0.99998	1e-05	1e-05		JAP_762	0.99999	1e-05
E. Asian	JAP_767	0.969753	0.0225926	1e-05	1.04444e-05	0.00762433	1e-05			JAP_767	0.971057	0.0220903	1e-05	0.006833	1e-05		767	JAP_767	0.974721	0.0252594	1e-05	1e-05		JAP_767	0.99998	1e-05	1e-05		JAP_767	0.99999	1e-05
E. Asian	JAP_751	0.969927	0.0161763	1e-05	1e-05	0.0138667	1e-05			JAP_751	0.971081	0.0159096	1.01111e-05	0.0129894	1e-05		751	JAP_751	0.980295	0.0196852	1e-05	1e-05		JAP_751	0.999979	1e-05	1.07778e-05		JAP_751	0.99999	1e-05
E. Asian	JAP_756	0.971928	0.0133818	1.01111e-05	1e-05	0.0146606	1.02222e-05			JAP_756	0.973052	0.0132147	1e-05	0.0137129	1e-05		756	JAP_756	0.982408	0.0175721	1e-05	1e-05		JAP_756	0.99998	1e-05	1.02222e-05		JAP_756	0.99999	1e-05
E. Asian	JAP_773	0.979786	0.014153	1e-05	1e-05	0.00603122	1e-05			JAP_773	0.98091	0.0136947	1e-05	0.00537556	1e-05		773	JAP_773	0.983244	0.0167359	1e-05	1e-05		JAP_773	0.99998	1e-05	1e-05		JAP_773	0.99999	1e-05
E. Asian	JAP_772	0.980354	0.0107568	1.05556e-05	1.02222e-05	0.00885778	1.03333e-05			JAP_772	0.981427	0.0106781	1e-05	0.00787478	1e-05		772	JAP_772	0.985842	0.0141376	1.08889e-05	1e-05		JAP_772	0.99998	1e-05	1e-05		JAP_772	0.99999	1e-05
E. Asian	JAP_766	0.980358	0.0137776	1e-05	1e-05	0.00583422	1.04444e-05			JAP_766	0.98162	0.0133026	1e-05	0.00505789	1e-05		766	JAP_766	0.984008	0.0159723	1e-05	1e-05		JAP_766	0.999979	1e-05	1.06667e-05		JAP_766	0.99999	1e-05
E. Asian	JAP_790	0.981736	0.0167569	1e-05	1e-05	0.00147744	1e-05			JAP_790	0.98285	0.0164543	1e-05	0.000675667	1e-05		790	JAP_790	0.980639	0.0193414	1e-05	1e-05		JAP_790	0.99998	1e-05	1e-05		JAP_790	0.99999	1e-05
E. Asian	JAP_828	0.982802	0.00897778	1e-05	1e-05	0.00819056	1e-05			JAP_828	0.983895	0.008683	1e-05	0.00740244	1e-05		828	JAP_828	0.987494	0.0124846	1.1e-05	1e-05		JAP_828	0.99998	1e-05	1e-05		JAP_828	0.99999	1e-05
E. Asian	JAP_757	0.983027	0.0128693	1e-05	1e-05	0.00407356	1e-05			JAP_757	0.98425	0.0123552	1e-05	0.00337522	1e-05		757	JAP_757	0.984086	0.015894	1e-05	1e-05		JAP_757	0.999979	1e-05	1.08889e-05		JAP_757	0.99999	1e-05
E. Asian	JAP_755	0.983998	0.0159619	1e-05	1e-05	1e-05	1.01111e-05			JAP_755	0.984492	0.0154779	1e-05	1e-05	1e-05		755	JAP_755	0.980328	0.0196498	1.05556e-05	1.11111e-05		JAP_755	0.99998	1e-05	1e-05		JAP_755	0.99999	1e-05
E. Asian	JAP_748	0.984658	0.0145971	1e-05	1e-05	0.000714778	1e-05			JAP_748	0.985758	0.01421	1e-05	1.16667e-05	1e-05		748	JAP_748	0.982507	0.0174726	1.06667e-05	1e-05		JAP_748	0.99998	1e-05	1e-05		JAP_748	0.99999	1e-05
E. Asian	JAP_769	0.984752	0.0152079	1e-05	1e-05	1e-05	1e-05			JAP_769	0.985075	0.0148951	1e-05	1e-05	1e-05		769	JAP_769	0.981803	0.0181771	1e-05	1e-05		JAP_769	0.999979	1.05556e-05	1e-05		JAP_769	0.99999	1e-05
E. Asian	JAP_791	0.985234	0.0147256	1e-05	1.01111e-05	1e-05	1e-05			JAP_791	0.985869	0.0141012	1e-05	1e-05	1e-05		791	JAP_791	0.982206	0.0177736	1e-05	1e-05		JAP_791	0.99998	1e-05	1e-05		JAP_791	0.99999	1e-05
E. Asian	JAP_749	0.985643	0.0124947	1e-05	1e-05	0.00183167	1.03333e-05			JAP_749	0.986847	0.0121871	1e-05	0.000945778	1e-05		749	JAP_749	0.985278	0.0147022	1e-05	1e-05		JAP_749	0.99998	1e-05	1e-05		JAP_749	0.99999	1e-05
E. Asian	JAP_765	0.985817	0.0113598	1e-05	1e-05	0.00279311	1.01111e-05			JAP_765	0.987052	0.0112359	1e-05	0.00169222	1e-05		765	JAP_765	0.985458	0.0145213	1.03333e-05	1e-05		JAP_765	0.99998	1.02222e-05	1e-05		JAP_765	0.99999	1e-05
E. Asian	JAP_768	0.986067	0.0138922	1e-05	1.07778e-05	1e-05	1e-05			JAP_768	0.986308	0.0136619	1e-05	1.01111e-05	1e-05		768	JAP_768	0.982689	0.0172911	1e-05	1e-05		JAP_768	0.999979	1.07778e-05	1e-05		JAP_768	0.99999	1e-05
E. Asian	JAP_753	0.986183	0.0137763	1e-05	1.03333e-05	1e-05	1e-05			JAP_753	0.986454	0.0135154	1e-05	1.06667e-05	1e-05		753	JAP_753	0.983017	0.016963	1.01111e-05	1e-05		JAP_753	0.99998	1e-05	1e-05		JAP_753	0.99999	1e-05
E. Asian	JAP_771	0.988059	0.011239	1e-05	1e-05	0.000671111	1.06667e-05			JAP_771	0.989009	0.01096	1e-05	1.1e-05	1e-05		771	JAP_771	0.986036	0.0139437	1e-05	1e-05		JAP_771	0.99998	1e-05	1e-05		JAP_771	0.99999	1e-05
E. Asian	JAP_750	0.988165	0.0117932	1.06667e-05	1.03333e-05	1e-05	1.03333e-05			JAP_750	0.988613	0.0113552	1e-05	1.16667e-05	1e-05		750	JAP_750	0.985009	0.0149714	1e-05	1e-05		JAP_750	0.99998	1e-05	1e-05		JAP_750	0.99999	1e-05
E. Asian	JAP_761	0.988261	0.00544411	1.01111e-05	1e-05	0.00626456	1.04444e-05			JAP_761	0.989359	0.00487644	1e-05	0.00574433	1e-05		761	JAP_761	0.991823	0.00815667	1e-05	1e-05		JAP_761	0.999979	1e-05	1.1e-05		JAP_761	0.99999	1e-05
E. Asian	JAP_758	0.988977	0.0109814	1e-05	1.11111e-05	1e-05	1.01111e-05			JAP_758	0.989555	0.0104149	1e-05	1e-05	1e-05		758	JAP_758	0.985165	0.0148146	1e-05	1e-05		JAP_758	0.999911	1e-05	7.93333e-05		JAP_758	0.99999	1e-05
E. Asian	JAP_752	0.990094	0.00659667	1e-05	1.02222e-05	0.00327978	1e-05			JAP_752	0.991141	0.00638389	1e-05	0.002455	1e-05		752	JAP_752	0.99107	0.00890867	1.12222e-05	1.02222e-05		JAP_752	0.99998	1e-05	1e-05		JAP_752	0.99999	1e-05
E. Asian	JAP_763	0.990204	0.00786633	1.01111e-05	1e-05	0.00189967	1e-05			JAP_763	0.991567	0.00769911	1e-05	0.000713444	1e-05		763	JAP_763	0.989101	0.0108759	1.08889e-05	1.15556e-05		JAP_763	0.99998	1e-05	1e-05		JAP_763	0.99999	1e-05
E. Asian	JAP_759	0.99056	0.00600778	1.02222e-05	1.06667e-05	0.00340178	1e-05			JAP_759	0.991818	0.00599267	1e-05	0.00216978	1e-05		759	JAP_759	0.991517	0.00846233	1.06667e-05	1e-05		JAP_759	0.99998	1.03333e-05	1e-05		JAP_759	0.99999	1e-05
E. Asian	JAP_747	0.991798	0.00662378	1e-05	1e-05	0.00154778	1.01111e-05			JAP_747	0.99306	0.00616244	1e-05	0.000757	1e-05		747	JAP_747	0.991138	0.00884156	1.07778e-05	1e-05		JAP_747	0.99998	1e-05	1e-05		JAP_747	0.99999	1e-05
E. Asian	JAP_760	0.992612	0.007347	1e-05	1e-05	1e-05	1.08889e-05			JAP_760	0.993238	0.00673167	1e-05	1e-05	1e-05		760	JAP_760	0.989316	0.0106633	1.1e-05	1e-05		JAP_760	0.99998	1e-05	1e-05		JAP_760	0.99999	1e-05
E. Asian	JAP_764	0.992876	0.00263878	1e-05	1e-05	0.00445511	1.01111e-05			JAP_764	0.99412	0.002213	1e-05	0.00364722	1e-05		764	JAP_764	0.994149	0.00583111	1e-05	1e-05		JAP_764	0.99998	1e-05	1e-05		JAP_764	0.99999	1e-05
E. Asian	XIB_1243	0.74154	0.0320027	1e-05	0.14897	1e-05	0.0774676			XIB_1243	0.748341	0.0341097	1e-05	0.00110933	0.21643		1243	XIB_1243	0.748805	0.0372893	1e-05	0.213896		XIB_1243	0.7831	1e-05	0.21689		XIB_1243	0.848112	0.151888
E. Asian	XIB_1247	0.858646	0.0242474	1e-05	0.086318	1e-05	0.0307683			XIB_1247	0.861466	0.024714	1e-05	1e-05	0.1138		1247	XIB_1247	0.860415	0.0290998	1e-05	0.110475		XIB_1247	0.887342	1e-05	0.112648		XIB_1247	0.926785	0.0732147
E. Asian	XIB_1248	0.89589	0.0244478	1e-05	0.0356097	1e-05	0.0440327			XIB_1248	0.901955	0.0263887	1e-05	1e-05	0.0716364		1248	XIB_1248	0.901071	0.0303452	1e-05	0.0685733		XIB_1248	0.929016	1e-05	0.0709743		XIB_1248	0.953553	0.0464473
E. Asian	XIB_1250	0.918683	0.0222907	1e-05	0.0456223	1e-05	0.0133841			XIB_1250	0.920081	0.0221281	1e-05	1e-05	0.057771		1250	XIB_1250	0.918902	0.0261877	1e-05	0.0548999		XIB_1250	0.942667	1e-05	0.0573231		XIB_1250	0.963823	0.036177
E. Asian	XIB_1244	0.928847	0.0180743	1e-05	0.0108727	1e-05	0.042186			XIB_1244	0.934965	0.0202304	1e-05	1.31111e-05	0.0447816		1244	XIB_1244	0.934033	0.0238649	1e-05	0.0420916		XIB_1244	0.955835	1e-05	0.0441552		XIB_1244	0.973964	0.0260364
E. Asian	XIB_1251	0.934102	0.0281861	1e-05	0.00987756	0.00714722	0.0206773			XIB_1251	0.937437	0.029029	1e-05	0.00747222	0.0260521		1251	XIB_1251	0.941235	0.0331088	1e-05	0.0256463		XIB_1251	0.971032	1e-05	0.0289576		XIB_1251	0.984672	0.0153282
E. Asian	XIB_1249	0.934226	0.0281749	1e-05	0.0204626	1e-05	0.0171164			XIB_1249	0.936922	0.028691	1e-05	1e-05	0.0343668		1249	XIB_1249	0.93528	0.032982	1e-05	0.0317283		XIB_1249	0.96612	1e-05	0.0338698		XIB_1249	0.983921	0.0160788
E. Asian	XIB_1245	0.944566	0.0226612	1e-05	0.0248373	1e-05	0.00791556			XIB_1245	0.945856	0.0225372	1e-05	1e-05	0.0315871		1245	XIB_1245	0.943875	0.0267133	1e-05	0.029402		XIB_1245	0.968883	1e-05	0.0311072		XIB_1245	0.982725	0.0172747
E. Asian	XIB_1246	0.946017	0.02613	1e-05	0.0131668	1e-05	0.0146668			XIB_1246	0.948516	0.026634	1e-05	1e-05	0.0248299		1246	XIB_1246	0.947063	0.0302943	1e-05	0.0226326		XIB_1246	0.975353	1e-05	0.0246369		XIB_1246	0.986528	0.0134718
E. Asian	YAK_953	0.551856	0.0907772	1e-05	0.219691	0.00122489	0.136441			YAK_953	0.56275	0.0951403	1e-05	0.00516189	0.336939		953	YAK_953	0.565065	0.0986144	1e-05	0.33631		YAK_953	0.659725	1e-05	0.340265		YAK_953	0.754756	0.245244
E. Asian	YAK_949	0.5838	0.0763252	1e-05	0.204583	1e-05	0.135272			YAK_949	0.597325	0.080879	1e-05	1e-05	0.321776		949	YAK_949	0.595324	0.0852447	1e-05	0.319421		YAK_949	0.677293	1e-05	0.322697		YAK_949	0.771921	0.228079
E. Asian	YAK_969	0.653833	0.0765324	1e-05	0.141749	1e-05	0.127866			YAK_969	0.668168	0.0815487	1e-05	1e-05	0.250264		969	YAK_969	0.666235	0.0862386	1e-05	0.247516		YAK_969	0.749211	1e-05	0.250779		YAK_969	0.827415	0.172585
E. Asian	YAK_950	0.720881	0.0786688	1.01111e-05	0.111584	1e-05	0.0888468			YAK_950	0.730809	0.0819062	1e-05	1e-05	0.187265		950	YAK_950	0.728292	0.0871938	1e-05	0.184504		YAK_950	0.812153	1e-05	0.187837		YAK_950	0.87402	0.12598
E. Asian	YAK_948	0.734956	0.080211	1e-05	0.0915872	1e-05	0.0932254			YAK_948	0.746012	0.0840152	1e-05	1e-05	0.169953		948	YAK_948	0.744174	0.0886918	1e-05	0.167124		YAK_948	0.829998	1e-05	0.169992		YAK_948	0.887164	0.112836
E. Asian	YAK_968	0.737515	0.0865321	1e-05	0.0768766	1e-05	0.099056			YAK_968	0.749717	0.090833	1e-05	1e-05	0.15943		968	YAK_968	0.747043	0.0959611	1e-05	0.156986		YAK_968	0.83976	1e-05	0.16023		YAK_968	0.893948	0.106052
E. Asian	YAK_958	0.744855	0.0767211	1e-05	0.0968171	1e-05	0.0815871			YAK_958	0.754126	0.0798623	1e-05	1e-05	0.165992		958	YAK_958	0.752705	0.0841268	1e-05	0.163158		YAK_958	0.833987	1e-05	0.166003		YAK_958	0.886771	0.113229
E. Asian	YAK_966	0.759307	0.081625	1.01111e-05	0.0914667	1e-05	0.0675809			YAK_966	0.766756	0.0839873	1e-05	1e-05	0.149237		966	YAK_966	0.763872	0.08938	1e-05	0.146738		YAK_966	0.850834	1e-05	0.149156		YAK_966	0.903721	0.0962793
E. Asian	YAK_947	0.76622	0.0794691	1e-05	0.0682416	1e-05	0.0860492			YAK_947	0.776802	0.083259	1e-05	1e-05	0.139919		947	YAK_947	0.774756	0.0880423	1e-05	0.137192		YAK_947	0.859453	1e-05	0.140537		YAK_947	0.909142	0.0908582
E. Asian	YAK_964	0.774292	0.0801849	1e-05	0.0643311	1e-05	0.081172			YAK_964	0.784194	0.0836789	1e-05	1e-05	0.132107		964	YAK_964	0.781842	0.0887563	1e-05	0.129392		YAK_964	0.868397	1e-05	0.131593		YAK_964	0.913791	0.0862092
E. Asian	YAK_967	0.778989	0.0899549	1e-05	0.05643	1e-05	0.0746063			YAK_967	0.788505	0.0932013	1e-05	1e-05	0.118273		967	YAK_967	0.786466	0.0979197	1e-05	0.115605		YAK_967	0.88177	1e-05	0.11822		YAK_967	0.924849	0.0751508
E. Asian	YAK_952	0.783936	0.088599	1e-05	0.0755426	1e-05	0.051902			YAK_952	0.789938	0.0902819	1e-05	1e-05	0.11976		952	YAK_952	0.787063	0.0959479	1e-05	0.116979		YAK_952	0.880174	1e-05	0.119816		YAK_952	0.924958	0.0750422
E. Asian	YAK_951	0.784106	0.0906114	1e-05	0.0377348	1e-05	0.0875274			YAK_951	0.796281	0.0949679	1e-05	1e-05	0.108731		951	YAK_951	0.794267	0.0998191	1e-05	0.105904		YAK_951	0.891657	1e-05	0.108333		YAK_951	0.933883	0.0661171
E. Asian	YAK_945	0.789141	0.0815714	1e-05	0.0374693	1e-05	0.0917987			YAK_945	0.801616	0.0861459	1e-05	1e-05	0.112218		945	YAK_945	0.799419	0.0912699	1e-05	0.109301		YAK_945	0.888373	1e-05	0.111617		YAK_945	0.931142	0.0688583
E. Asian	YAK_954	0.791309	0.0780177	1e-05	0.0409956	1e-05	0.0896579			YAK_954	0.803653	0.0826529	1e-05	1e-05	0.113675		954	YAK_954	0.80177	0.0872759	1e-05	0.110944		YAK_954	0.886311	1e-05	0.113679		YAK_954	0.926717	0.0732829
E. Asian	YAK_961	0.79183	0.0736272	1e-05	0.0415067	1e-05	0.0930162			YAK_961	0.805237	0.0781843	1e-05	1e-05	0.116559		961	YAK_961	0.802792	0.0833437	1e-05	0.113854		YAK_961	0.884144	1e-05	0.115846		YAK_961	0.925783	0.0742169
E. Asian	YAK_962	0.791866	0.0929761	1e-05	0.0415168	1e-05	0.0736213			YAK_962	0.801961	0.0963564	1e-05	1e-05	0.101663		962	YAK_962	0.799249	0.101823	1e-05	0.0989171		YAK_962	0.89828	1e-05	0.10171		YAK_962	0.9362	0.0637996
E. Asian	YAK_955	0.792885	0.0783334	1e-05	0.058199	1e-05	0.070562			YAK_955	0.801784	0.0813664	1e-05	1e-05	0.11683		955	YAK_955	0.799583	0.0863366	1e-05	0.114071		YAK_955	0.883399	1e-05	0.116591		YAK_955	0.925383	0.0746168
E. Asian	YAK_965	0.796276	0.0796772	1e-05	0.0475941	1e-05	0.0764326			YAK_965	0.806487	0.0830648	1e-05	1e-05	0.110428		965	YAK_965	0.80339	0.0883924	1e-05	0.108208		YAK_965	0.889374	1e-05	0.110616		YAK_965	0.930358	0.0696418
E. Asian	YAK_956	0.797481	0.0739581	1e-05	0.0315502	1e-05	0.0969911			YAK_956	0.810583	0.0793523	1e-05	1e-05	0.110045		956	YAK_956	0.809079	0.0837617	1e-05	0.107149		YAK_956	0.89076	1e-05	0.10923		YAK_956	0.931069	0.0689307
E. Asian	YAK_960	0.800636	0.0849508	1e-05	0.0481864	1e-05	0.0662069			YAK_960	0.809417	0.0877749	1e-05	1e-05	0.102788		960	YAK_960	0.80732	0.0927656	1e-05	0.0999041		YAK_960	0.897393	1e-05	0.102597		YAK_960	0.93738	0.0626201
E. Asian	YAK_963	0.803291	0.0818509	1e-05	0.058918	1e-05	0.0559208			YAK_963	0.810107	0.0839129	1e-05	1e-05	0.10596		963	YAK_963	0.807406	0.0893818	1e-05	0.103202		YAK_963	0.894506	1e-05	0.105484		YAK_963	0.933214	0.0667862
E. Asian	YAK_946	0.803365	0.07254	1e-05	0.0592843	1e-05	0.0647911			YAK_946	0.811181	0.0751407	1e-05	1e-05	0.113658		946	YAK_946	0.808185	0.0806587	1e-05	0.111147		YAK_946	0.886916	1e-05	0.113074		YAK_946	0.92766	0.0723399
E. Asian	YAK_957	0.808666	0.0794214	1e-05	0.0287619	1e-05	0.0831302			YAK_957	0.820332	0.0835989	1e-05	1e-05	0.0960488		957	YAK_957	0.819335	0.0876807	1e-05	0.0929744		YAK_957	0.90452	1e-05	0.09547		YAK_957	0.941764	0.0582361
E. Asian	YAK_959	0.854066	0.113633	1e-05	0.00503722	1e-05	0.0272433			YAK_959	0.858202	0.114821	1e-05	1e-05	0.0269566		959	YAK_959	0.855786	0.119896	1e-05	0.0243074		YAK_959	0.972604	1e-05	0.0273862		YAK_959	0.988817	0.0111833
E. Asian	MONG_1226	0.796711	0.0610256	1e-05	0.0654511	0.00124378	0.0755586			MONG_1226	0.804261	0.0643427	1e-05	0.00370456	0.127681		1226	MONG_1226	0.805765	0.068409	1e-05	0.125816		MONG_1226	0.871672	1e-05	0.128318		MONG_1226	0.91629	0.08371
E. Asian	MONG_1229	0.800279	0.0583823	1e-05	0.049939	1e-05	0.0913794			MONG_1229	0.811898	0.0626923	1e-05	0.000974556	0.124425		1229	MONG_1229	0.811283	0.067084	1e-05	0.121623		MONG_1229	0.875643	1e-05	0.124347		MONG_1229	0.919469	0.0805311
E. Asian	MONG_1230	0.821938	0.05878	1e-05	0.0425554	1e-05	0.0767062			MONG_1230	0.831836	0.062418	1e-05	1e-05	0.105726		1230	MONG_1230	0.829809	0.0672892	1e-05	0.102892		MONG_1230	0.895066	1e-05	0.104924		MONG_1230	0.935264	0.0647356
E. Asian	MONG_1227	0.910713	0.0255409	1e-05	0.0446304	0.00180189	0.0173042			MONG_1227	0.913041	0.0255888	1e-05	0.00154744	0.059813		1227	MONG_1227	0.913005	0.0296457	1e-05	0.0573392		MONG_1227	0.941007	1e-05	0.0589828		MONG_1227	0.964498	0.0355024
E. Asian	MONG_1223	0.913173	0.0295222	1e-05	0.0339794	1e-05	0.0233059			MONG_1223	0.916387	0.0302101	1e-05	1e-05	0.0533827		1223	MONG_1223	0.91407	0.0352788	1e-05	0.0506411		MONG_1223	0.947777	1e-05	0.0522132		MONG_1223	0.969341	0.0306586
E. Asian	MONG_1232	0.914014	0.0328318	1e-05	0.0291936	0.000228889	0.0237223			MONG_1232	0.917245	0.0334818	1e-05	0.000641667	0.0486214		1232	MONG_1232	0.916526	0.0372969	1e-05	0.0461676		MONG_1232	0.95232	0.00373122	0.0439487		MONG_1232	0.967865	0.0321348
E. Asian	MONG_1228	0.914038	0.0355232	1e-05	0.0313976	1e-05	0.0190212			MONG_1228	0.91676	0.0359063	1e-05	1e-05	0.0473131		1228	MONG_1228	0.915096	0.0399678	1e-05	0.0449262		MONG_1228	0.952894	1e-05	0.0470964		MONG_1228	0.972566	0.027434
E. Asian	MONG_1224	0.932428	0.0199563	1e-05	0.0202406	1e-05	0.0273553			MONG_1224	0.936596	0.0211927	1e-05	1e-05	0.0421916		1224	MONG_1224	0.934655	0.0258902	1e-05	0.0394449		MONG_1224	0.959067	1e-05	0.0409227		MONG_1224	0.976278	0.0237221
E. Asian	MONG_1225	0.935213	0.0259159	1e-05	0.0237171	1e-05	0.0151346			MONG_1225	0.937532	0.0260926	1e-05	1e-05	0.0363557		1225	MONG_1225	0.935427	0.0307039	1e-05	0.0338592		MONG_1225	0.965436	1e-05	0.0345539		MONG_1225	0.981332	0.0186676
E. Asian	MONG_1231	0.946792	0.0218518	1e-05	0.0313262	1e-05	1e-05			MONG_1231	0.946755	0.021003	1e-05	1e-05	0.0322221		1231	MONG_1231	0.943727	0.0262947	1e-05	0.0299688		MONG_1231	0.96801	1e-05	0.0319804		MONG_1231	0.982067	0.0179329
E. Asian	ORQ_1211	0.879312	0.0851264	1e-05	0.00353956	1e-05	0.0320016			ORQ_1211	0.884686	0.0866734	1e-05	1e-05	0.0286203		1211	ORQ_1211	0.881781	0.0918652	1e-05	0.0263431		ORQ_1211	0.970616	1e-05	0.0293743		ORQ_1211	0.987544	0.0124564
E. Asian	ORQ_1206	0.889003	0.071557	1e-05	0.0211986	1e-05	0.0182209			ORQ_1206	0.89189	0.0719949	1e-05	1e-05	0.0360952		1206	ORQ_1206	0.887795	0.077884	1e-05	0.034311		ORQ_1206	0.963966	1e-05	0.0360242		ORQ_1206	0.982151	0.0178488
E. Asian	ORQ_1203	0.900905	0.0702597	1e-05	0.0152731	1e-05	0.0135422			ORQ_1203	0.903213	0.0705454	1e-05	1e-05	0.0262216		1203	ORQ_1203	0.899576	0.0760949	1e-05	0.024319		ORQ_1203	0.973364	1e-05	0.0266257		ORQ_1203	0.988046	0.0119543
E. Asian	ORQ_1207	0.902888	0.0570969	1e-05	0.0277017	1e-05	0.0122938			ORQ_1207	0.904789	0.057239	1e-05	1e-05	0.0379521		1207	ORQ_1207	0.90191	0.062106	1e-05	0.0359734		ORQ_1207	0.960884	1e-05	0.0391064		ORQ_1207	0.982076	0.0179237
E. Asian	ORQ_1205	0.9079	0.0476579	1e-05	0.0229723	0.00198744	0.0194727			ORQ_1205	0.910848	0.0481812	1e-05	0.00207611	0.0388842		1205	ORQ_1205	0.910324	0.0529799	1e-05	0.0366859		ORQ_1205	0.961142	1e-05	0.0388483		ORQ_1205	0.979682	0.0203183
E. Asian	ORQ_1209	0.911138	0.0582243	1e-05	0.00995356	0.000296111	0.0203779			ORQ_1209	0.914113	0.0591042	1e-05	0.000595556	0.0261767		1209	ORQ_1209	0.91295	0.0630023	1e-05	0.0240384		ORQ_1209	0.973766	1e-05	0.0262242		ORQ_1209	0.989961	0.0100389
E. Asian	ORQ_1212	0.912763	0.0349357	1e-05	0.0368029	1e-05	0.0154782			ORQ_1212	0.914657	0.035084	1e-05	1e-05	0.0502393		1212	ORQ_1212	0.912596	0.0396552	1e-05	0.047739		ORQ_1212	0.950672	1e-05	0.0493176		ORQ_1212	0.971967	0.0280327
E. Asian	ORQ_1208	0.92201	0.0550998	1e-05	0.006349	1e-05	0.0165217			ORQ_1208	0.924913	0.0558083	1e-05	1e-05	0.0192582		1208	ORQ_1208	0.921773	0.0610231	1e-05	0.0171936		ORQ_1208	0.981268	1e-05	0.0187216		ORQ_1208	0.99327	0.00673044
E. Asian	ORQ_1204	0.948587	0.0232033	1e-05	0.0170223	1e-05	0.0111676			ORQ_1204	0.95063	0.0233476	1e-05	1e-05	0.0260023		1204	ORQ_1204	0.948148	0.0277957	1e-05	0.0240466		ORQ_1204	0.973367	1e-05	0.0266226		ORQ_1204	0.985039	0.0149611
E. Asian	HEZ_1234	0.913512	0.0505828	1e-05	0.006149	0.00105433	0.0286921			HEZ_1234	0.918147	0.0521477	1e-05	0.00221978	0.0274753		1234	HEZ_1234	0.91835	0.0563126	1e-05	0.025328		HEZ_1234	0.971976	1e-05	0.0280141		HEZ_1234	0.985301	0.0146989
E. Asian	HEZ_1238	0.921425	0.0332828	1e-05	0.0154018	1e-05	0.0298712			HEZ_1238	0.925518	0.0345656	1e-05	1e-05	0.0398961		1238	HEZ_1238	0.923849	0.0386572	1e-05	0.0374838		HEZ_1238	0.960162	1e-05	0.0398276		HEZ_1238	0.978349	0.0216509
E. Asian	HEZ_1240	0.921427	0.0580723	1e-05	0.0107051	1e-05	0.00977578			HEZ_1240	0.923312	0.0583617	1e-05	1e-05	0.0183068		1240	HEZ_1240	0.920413	0.0636066	1e-05	0.01597		HEZ_1240	0.981262	1e-05	0.0187284		HEZ_1240	0.993885	0.00611533
E. Asian	HEZ_1237	0.925829	0.0576268	1e-05	0.0122641	1e-05	0.00426033			HEZ_1237	0.926941	0.0574044	1e-05	1e-05	0.015635		1237	HEZ_1237	0.92239	0.0639786	1e-05	0.0136211		HEZ_1237	0.983307	1e-05	0.0166833		HEZ_1237	0.99464	0.00535989
E. Asian	HEZ_1239	0.927909	0.0396059	1e-05	0.00136689	0.00391311	0.0271951			HEZ_1239	0.931868	0.0412833	1e-05	0.00494733	0.0218912		1239	HEZ_1239	0.934044	0.0449486	1e-05	0.0209973		HEZ_1239	0.978413	1e-05	0.0215768		HEZ_1239	0.992205	0.00779467
E. Asian	HEZ_1242	0.933914	0.0432573	1e-05	0.014424	0.00131578	0.00707867			HEZ_1242	0.935668	0.0432756	1e-05	0.000672778	0.0203736		1242	HEZ_1242	0.93432	0.0473478	1e-05	0.0183218		HEZ_1242	0.979023	1e-05	0.020967		HEZ_1242	0.989824	0.0101756
E. Asian	HEZ_1241	0.946641	0.03082	1e-05	0.00964978	1e-05	0.0128692			HEZ_1241	0.948953	0.0312679	1e-05	1e-05	0.0197597		1241	HEZ_1241	0.946613	0.0358957	1e-05	0.0174816		HEZ_1241	0.980039	1e-05	0.0199506		HEZ_1241	0.992547	0.00745311
E. Asian	HEZ_1236	0.957654	0.0329322	1e-05	0.00317633	1e-05	0.00621722			HEZ_1236	0.959276	0.0329468	1e-05	1e-05	0.00775756		1236	HEZ_1236	0.956855	0.0365203	1e-05	0.00661467		HEZ_1236	0.989814	1e-05	0.0101758		HEZ_1236	0.998963	0.00103722
E. Asian	DAUR_1214	0.895825	0.0394798	1e-05	0.0324884	1e-05	0.0321869			DAUR_1214	0.900274	0.0407046	1e-05	3.65556e-05	0.0589749		1214	DAUR_1214	0.898822	0.0450088	1e-05	0.0561594		DAUR_1214	0.941248	1e-05	0.0587424		DAUR_1214	0.965003	0.0349973
E. Asian	DAUR_1216	0.90351	0.0511219	1e-05	0.025051	0.00334922	0.0169572			DAUR_1216	0.906229	0.051556	1e-05	0.00300444	0.0392009		1216	DAUR_1216	0.906811	0.0558714	1e-05	0.0373078		DAUR_1216	0.960274	1e-05	0.039716		DAUR_1216	0.978117	0.0218827
E. Asian	DAUR_1215	0.91203	0.0329096	1e-05	0.0230067	1e-05	0.0320333			DAUR_1215	0.916116	0.0343489	1e-05	0.00112567	0.0484		1215	DAUR_1215	0.91546	0.0385194	1e-05	0.0460106		DAUR_1215	0.952301	1e-05	0.0476894		DAUR_1215	0.972011	0.0279889
E. Asian	DAUR_1217	0.916477	0.030126	1e-05	0.0347606	1e-05	0.0186159			DAUR_1217	0.918994	0.0304817	1e-05	1e-05	0.0505042		1217	DAUR_1217	0.916723	0.0352112	1e-05	0.0480563		DAUR_1217	0.949832	1e-05	0.0501581		DAUR_1217	0.971783	0.0282172
E. Asian	DAUR_1218	0.917733	0.0397417	1e-05	0.0227161	0.00242322	0.0173762			DAUR_1218	0.92027	0.0402932	1e-05	0.00229378	0.0371323		1218	DAUR_1218	0.92029	0.0446018	1e-05	0.0350978		DAUR_1218	0.963357	0.000461778	0.0361814		DAUR_1218	0.977158	0.0228424
E. Asian	DAUR_1220	0.917972	0.046888	1e-05	0.0187331	1e-05	0.0163871			DAUR_1220	0.920619	0.0473253	1e-05	1e-05	0.0320361		1220	DAUR_1220	0.918103	0.0521866	1e-05	0.0297		DAUR_1220	0.968096	1e-05	0.0318942		DAUR_1220	0.982296	0.0177042
E. Asian	DAUR_1221	0.925623	0.0412747	1e-05	0.0330724	1e-05	1e-05			DAUR_1221	0.925654	0.0407252	1e-05	1e-05	0.0336016		1221	DAUR_1221	0.923852	0.0448197	1e-05	0.0313186		DAUR_1221	0.966448	1e-05	0.0335424		DAUR_1221	0.981981	0.018019
E. Asian	DAUR_1222	0.932959	0.0316908	1e-05	0.0276869	1e-05	0.00764344			DAUR_1222	0.934202	0.0315406	1e-05	1e-05	0.0342372		1222	DAUR_1222	0.932146	0.0359794	1e-05	0.0318647		DAUR_1222	0.966652	1e-05	0.0333379		DAUR_1222	0.982028	0.017972
E. Asian	DAUR_1213	0.934963	0.0337737	1e-05	0.0308609	1e-05	0.000382444			DAUR_1213	0.93491	0.0328161	1e-05	1e-05	0.0322536		1213	DAUR_1213	0.931736	0.0379739	1e-05	0.0302799		DAUR_1213	0.968421	1e-05	0.0315689		DAUR_1213	0.984695	0.0153047
E. Asian	NHAN_1296	0.951773	0.00859211	1e-05	0.0141711	0.00539567	0.0200588			NHAN_1296	0.955208	0.00911678	1e-05	0.00585556	0.0298101		1296	NHAN_1296	0.958068	0.0132187	1e-05	0.0287037		NHAN_1296	0.96899	1e-05	0.0309996		NHAN_1296	0.981257	0.0187432
E. Asian	NHAN_1290	0.96055	0.0217433	1e-05	0.0161707	1e-05	0.00151589			NHAN_1290	0.96115	0.0211817	1e-05	1e-05	0.0176481		1290	NHAN_1290	0.959632	0.0248976	1e-05	0.0154601		NHAN_1290	0.982163	1e-05	0.017827		NHAN_1290	0.993728	0.00627233
E. Asian	NHAN_1288	0.962758	0.0122683	1e-05	0.010307	0.00467744	0.00997956			NHAN_1288	0.964935	0.0125133	1e-05	0.00417833	0.0183637		1288	NHAN_1288	0.966503	0.0163871	1e-05	0.0171		NHAN_1288	0.980421	1e-05	0.0195692		NHAN_1288	0.990813	0.00918656
E. Asian	NHAN_1295	0.966285	0.00570978	1e-05	0.008407	0.00320822	0.0163798			NHAN_1295	0.969129	0.00661978	1e-05	0.00326967	0.0209711		1295	NHAN_1295	0.96988	0.0105104	1e-05	0.0195991		NHAN_1295	0.978104	1e-05	0.0218862		NHAN_1295	0.988419	0.0115813
E. Asian	NHAN_1287	0.970529	0.011017	1e-05	0.0139479	1e-05	0.00448678			NHAN_1287	0.971219	0.010882	1e-05	1e-05	0.0178791		1287	NHAN_1287	0.96955	0.0146232	1e-05	0.0158173		NHAN_1287	0.981936	1e-05	0.0180538		NHAN_1287	0.991363	0.00863733
E. Asian	NHAN_1291	0.972609	0.000599333	1e-05	0.00362989	0.00148956	0.0216623			NHAN_1291	0.975542	0.00150922	1e-05	0.002441	0.0204977		1291	NHAN_1291	0.976455	0.00465833	1e-05	0.0188763		NHAN_1291	0.978704	1e-05	0.0212859		NHAN_1291	0.988847	0.0111533
E. Asian	NHAN_1289	0.974451	0.0115529	1e-05	0.0139567	1e-05	1.93333e-05			NHAN_1289	0.974614	0.0110068	1e-05	1e-05	0.0143594		1289	NHAN_1289	0.97196	0.0157867	1e-05	0.0122433		NHAN_1289	0.986011	1e-05	0.0139792		NHAN_1289	0.998257	0.00174267
E. Asian	NHAN_1293	0.975	0.00296633	1e-05	0.0183532	0.00366022	1e-05			NHAN_1293	0.975569	0.00295967	1e-05	0.00306122	0.0183999		1293	NHAN_1293	0.977053	0.00639733	1e-05	0.0165399		NHAN_1293	0.980395	1e-05	0.0195952		NHAN_1293	0.989001	0.0109987
E. Asian	NHAN_1294	0.97799	1e-05	1e-05	1e-05	0.00115156	0.0208287			NHAN_1294	0.982821	1e-05	1e-05	0.00186778	0.0152911		1294	NHAN_1294	0.985786	1e-05	1e-05	0.014194		NHAN_1294	0.983881	1e-05	0.0161094		NHAN_1294	0.993696	0.00630433
E. Asian	NHAN_1292	0.988858	0.00247211	1e-05	1e-05	1e-05	0.00863944			NHAN_1292	0.992118	0.00295967	1e-05	1e-05	0.00490222		1292	NHAN_1292	0.989398	0.00738778	1e-05	0.00320489		NHAN_1292	0.991932	1e-05	0.00805822		NHAN_1292	0.99999	1e-05
E. Asian	TU_1353	0.868362	0.0265354	1e-05	0.0523587	0.00506156	0.0476728			TU_1353	0.873853	0.0282649	1e-05	0.00639667	0.0914751		1353	TU_1353	0.877365	0.0321999	1e-05	0.0904252		TU_1353	0.90777	1e-05	0.0922199		TU_1353	0.940154	0.0598462
E. Asian	TU_1350	0.876658	0.015134	1e-05	0.0367451	0.00981356	0.0616398			TU_1350	0.884061	0.0178667	1e-05	0.0118623	0.0862007		1350	TU_1350	0.891566	0.0214241	1e-05	0.0869996		TU_1350	0.910192	1e-05	0.0897981		TU_1350	0.940365	0.0596354
E. Asian	TU_1348	0.877518	0.0240787	1e-05	0.0413781	0.00790922	0.0491057			TU_1348	0.883473	0.0262158	1e-05	0.00924889	0.0810524		1348	TU_1348	0.88881	0.0303693	1e-05	0.0808113		TU_1348	0.917505	0.00254111	0.0799537		TU_1348	0.943461	0.0565388
E. Asian	TU_1356	0.881884	0.0198622	1e-05	0.0333171	0.0133009	0.051626			TU_1356	0.887695	0.0222856	1e-05	0.0154641	0.0745454		1356	TU_1356	0.897945	0.0258968	1e-05	0.0761482		TU_1356	0.921893	2.5e-05	0.0780821		TU_1356	0.947448	0.0525524
E. Asian	TU_1347	0.895967	0.02051	0.000478222	0.0145942	0.00904989	0.0594006			TU_1347	0.902869	0.0238172	0.000942889	0.011401	0.0609696		1347	TU_1347	0.910206	0.0273926	0.000804111	0.0615969		TU_1347	0.935561	0.00372278	0.0607159		TU_1347	0.956564	0.043436
E. Asian	TU_1351	0.896015	0.0231802	1e-05	0.0282433	0.00843911	0.0441121			TU_1351	0.90143	0.0250117	1e-05	0.010302	0.0632459		1351	TU_1351	0.90813	0.0283959	1e-05	0.0634646		TU_1351	0.934843	1e-05	0.0651468		TU_1351	0.95882	0.0411796
E. Asian	TU_1355	0.908554	0.0183528	1e-05	0.0233701	0.00483256	0.0448808			TU_1355	0.914639	0.0202962	1e-05	0.00688322	0.0581713		1355	TU_1355	0.918574	0.024226	1e-05	0.0571902		TU_1355	0.940228	0.00125556	0.0585159		TU_1355	0.959094	0.0409057
E. Asian	TU_1352	0.917617	0.016852	1e-05	0.0174468	0.00283278	0.0452409			TU_1352	0.923738	0.0190782	1e-05	0.00443522	0.052738		1352	TU_1352	0.925822	0.0226918	1e-05	0.0514758		TU_1352	0.94684	1e-05	0.0531498		TU_1352	0.967507	0.0324932
E. Asian	TU_1349	0.919178	0.017904	1e-05	0.0258923	0.00559022	0.0314252			TU_1349	0.923206	0.019272	1e-05	0.00611233	0.0513998		1349	TU_1349	0.926717	0.0230937	1e-05	0.0501798		TU_1349	0.948077	1e-05	0.0519126		TU_1349	0.968111	0.0318886
E. Asian	TU_1354	0.920974	0.0142692	1e-05	0.0141374	1e-05	0.0505993			TU_1354	0.928528	0.0169116	1e-05	1e-05	0.0545401		1354	TU_1354	0.927256	0.0208724	1e-05	0.0518611		TU_1354	0.946665	1e-05	0.0533252		TU_1354	0.966057	0.0339428
E. Asian	CAMB_715	0.78943	1e-05	0.00438911	0.0176781	0.0519036	0.13659			CAMB_715	0.806714	0.00438689	0.00540611	0.0584648	0.125028		715	CAMB_715	0.847087	0.00580156	0.00933611	0.137776		CAMB_715	0.848461	0.0148406	0.136698		CAMB_715	0.885823	0.114177
E. Asian	CAMB_721	0.799883	1e-05	0.00814433	1.08889e-05	0.0588421	0.133109			CAMB_721	0.819843	1e-05	0.00983978	0.0658392	0.104467		721	CAMB_721	0.866162	1e-05	0.0149183	0.11891		CAMB_721	0.861228	0.0212676	0.117505		CAMB_721	0.89305	0.10695
E. Asian	CAMB_720	0.811517	1e-05	0.00227478	1.02222e-05	0.0588709	0.127317			CAMB_720	0.832058	1e-05	0.00456222	0.0663251	0.0970452		720	CAMB_720	0.879336	1e-05	0.00857367	0.112081		CAMB_720	0.873763	0.0139451	0.112292		CAMB_720	0.905977	0.0940231
E. Asian	CAMB_713	0.819134	1e-05	0.000767889	0.00789189	0.0500614	0.122135			CAMB_713	0.837057	1e-05	0.00198167	0.0568854	0.104066		713	CAMB_713	0.87745	1e-05	0.00641589	0.116124		CAMB_713	0.870495	0.0129566	0.116549		CAMB_713	0.903661	0.0963389
E. Asian	CAMB_711	0.819272	1e-05	0.00709156	0.00149333	0.0582279	0.113905			CAMB_711	0.834101	0.00319278	0.00797433	0.0644799	0.0902524		711	CAMB_711	0.878508	0.00482622	0.0125451	0.10412		CAMB_711	0.878992	0.0176761	0.103332		CAMB_711	0.908719	0.0912813
E. Asian	CAMB_717	0.828719	1e-05	0.008289	1.13333e-05	0.0578538	0.105117			CAMB_717	0.843106	0.002315	0.00905056	0.0635232	0.0820049		717	CAMB_717	0.887735	0.00356411	0.0133492	0.0953513		CAMB_717	0.887625	0.018952	0.0934229		CAMB_717	0.913853	0.0861473
E. Asian	CAMB_719	0.871968	1e-05	0.00416	0.00120278	0.0400873	0.0825716			CAMB_719	0.884905	1e-05	0.00452156	0.0444347	0.066129		719	CAMB_719	0.917627	1e-05	0.00728644	0.075077		CAMB_719	0.914093	0.0128414	0.0730654		CAMB_719	0.935961	0.0640386
E. Asian	CAMB_714	0.876313	1e-05	1e-05	0.00921533	0.0414233	0.0730278			CAMB_714	0.888485	1.13333e-05	1e-05	0.0455418	0.0659521		714	CAMB_714	0.921643	0.000980444	0.00228189	0.075095		CAMB_714	0.918847	0.00732111	0.0738322		CAMB_714	0.941633	0.058367
E. Asian	CAMB_716	0.902039	9.35556e-05	0.00790456	0.00836344	0.0342167	0.0473829			CAMB_716	0.908638	0.00249678	0.008025	0.0366719	0.0441684		716	CAMB_716	0.93431	0.005146	0.00997289	0.0505709		CAMB_716	0.935549	0.0157323	0.0487181		CAMB_716	0.950225	0.0497753
E. Asian	CAMB_712	0.957092	1e-05	1e-05	1e-05	0.0229431	0.019935			CAMB_712	0.961644	1.03333e-05	1e-05	0.0241443	0.0141912		712	CAMB_712	0.981058	1e-05	1e-05	0.0189217		CAMB_712	0.976704	0.00166478	0.0216311		CAMB_712	0.985569	0.0144314
E. Asian	NAXI_1346	0.95463	0.00813344	1e-05	1e-05	0.0244522	0.012764			NAXI_1346	0.958377	0.00952078	1e-05	0.0261439	0.005948		1346	NAXI_1346	0.976383	0.0129226	1e-05	0.0106848		NAXI_1346	0.985905	1e-05	0.014085		NAXI_1346	0.993156	0.00684433
E. Asian	NAXI_1341	0.960979	0.00745644	1.1e-05	1e-05	0.0134184	0.018125			NAXI_1341	0.964831	0.00873867	1e-05	0.0143541	0.0120658		1341	NAXI_1341	0.974274	0.0124354	1e-05	0.0132806		NAXI_1341	0.982705	1e-05	0.0172851		NAXI_1341	0.991796	0.008204
E. Asian	NAXI_1340	0.963635	0.00837478	1e-05	1e-05	0.0147292	0.0132412			NAXI_1340	0.96703	0.00930933	1e-05	0.0154724	0.00817867		1340	NAXI_1340	0.977365	0.0123973	1e-05	0.0102272		NAXI_1340	0.987023	1e-05	0.0129667		NAXI_1340	0.995555	0.00444533
E. Asian	NAXI_1337	0.974034	0.00103456	1e-05	1e-05	0.00975578	0.0151552			NAXI_1337	0.978373	0.00256678	1e-05	0.0111496	0.00790033		1337	NAXI_1337	0.98492	0.00642633	1e-05	0.00864389		NAXI_1337	0.987775	1e-05	0.0122149		NAXI_1337	0.997181	0.00281944
E. Asian	NAXI_1338	0.975137	1e-05	1.01111e-05	1e-05	0.0149224	0.00990989			NAXI_1338	0.980644	0.000127	1e-05	0.0164139	0.00280578		1338	NAXI_1338	0.990516	0.00392178	1e-05	0.00555211		NAXI_1338	0.990506	1e-05	0.009484		NAXI_1338	0.997777	0.00222322
E. Asian	NAXI_1345	0.979153	1e-05	1.02222e-05	1e-05	0.00852011	0.0122973			NAXI_1345	0.98306	1.05556e-05	1e-05	0.00900178	0.00791722		1345	NAXI_1345	0.988266	0.00349433	1e-05	0.00823011		NAXI_1345	0.989528	1e-05	0.0104624		NAXI_1345	0.996885	0.00311544
E. Asian	NAXI_1339	0.979489	0.00172033	1e-05	1e-05	0.0129376	0.00583344			NAXI_1339	0.982128	0.00202411	1e-05	0.0127993	0.00303867		1339	NAXI_1339	0.990139	0.00587089	1e-05	0.00398022		NAXI_1339	0.990242	1e-05	0.00974767		NAXI_1339	0.997226	0.00277367
E. Asian	NAXI_1342	0.979987	1e-05	1e-05	0.000995556	0.0130782	0.00591889			NAXI_1342	0.981962	1.12222e-05	1e-05	0.0127901	0.00522711		1342	NAXI_1342	0.990792	0.00257067	1e-05	0.00662756		NAXI_1342	0.990532	1e-05	0.00945844		NAXI_1342	0.99655	0.00345022
E. Asian	LAHU_1319	0.951437	1e-05	1e-05	1e-05	0.0288132	0.0197198			LAHU_1319	0.956221	1e-05	1e-05	0.0302108	0.0135486		1319	LAHU_1319	0.979172	0.000861444	1e-05	0.0199567		LAHU_1319	0.976481	1e-05	0.0235086		LAHU_1319	0.987277	0.0127233
E. Asian	LAHU_1321	0.955811	1e-05	1e-05	0.000491222	0.0294666	0.0142117			LAHU_1321	0.958707	1.01111e-05	1e-05	0.0299561	0.0113173		1321	LAHU_1321	0.981303	0.000611556	0.000553111	0.0175319		LAHU_1321	0.978029	0.00515689	0.0168143		LAHU_1321	0.985327	0.0146728
E. Asian	LAHU_1320	0.959307	1e-05	1e-05	1e-05	0.0292864	0.0113764			LAHU_1320	0.96598	1.02222e-05	1e-05	0.0318138	0.00218611		1320	LAHU_1320	0.990378	1e-05	1e-05	0.00960178		LAHU_1320	0.9849	0.00280433	0.0122958		LAHU_1320	0.991758	0.00824167
E. Asian	LAHU_1318	0.961054	1e-05	1.07778e-05	1e-05	0.0221679	0.016747			LAHU_1318	0.966745	1e-05	1e-05	0.0241686	0.00906656		1318	LAHU_1318	0.985383	1e-05	1e-05	0.0145969		LAHU_1318	0.981584	0.00189133	0.0165242		LAHU_1318	0.988743	0.0112571
E. Asian	LAHU_1323	0.963591	1e-05	1e-05	1e-05	0.0221299	0.0142493			LAHU_1323	0.968646	1e-05	1e-05	0.0232289	0.008105		1323	LAHU_1323	0.985942	1e-05	0.000297778	0.0137503		LAHU_1323	0.979787	0.00677311	0.0134399		LAHU_1323	0.985579	0.0144206
E. Asian	LAHU_1326	0.96507	0.00340611	1e-05	1e-05	0.0246686	0.00683578			LAHU_1326	0.969292	0.00439667	1e-05	0.0262918	1e-05		1326	LAHU_1326	0.989727	0.00863433	1e-05	0.00162911		LAHU_1326	0.993904	1e-05	0.00608578		LAHU_1326	0.999234	0.000765667
E. Asian	LAHU_1322	0.965347	1e-05	1e-05	0.000623778	0.0226816	0.0113274			LAHU_1322	0.968268	1.31111e-05	1e-05	0.0226748	0.00903389		1322	LAHU_1322	0.984872	0.00126256	1e-05	0.0138551		LAHU_1322	0.982148	1e-05	0.0178416		LAHU_1322	0.991073	0.008927
E. Asian	LAHU_1317	0.974053	1e-05	1e-05	1e-05	0.0259058	1.1e-05			LAHU_1317	0.974605	1.05556e-05	1e-05	0.025364	1e-05		1317	LAHU_1317	0.999966	1.36667e-05	1e-05	1e-05		LAHU_1317	0.9989	1e-05	0.00108978		LAHU_1317	0.99999	1e-05
E. Asian	YI_1183	0.955894	0.00764478	1e-05	1e-05	0.0184534	0.0179878			YI_1183	0.960445	0.00939044	1e-05	0.0200918	0.0100627		1183	YI_1183	0.973376	0.0132428	1e-05	0.0133712		YI_1183	0.982146	0.00253967	0.0153143		YI_1183	0.989382	0.0106182
E. Asian	YI_1182	0.957316	0.0150818	1e-05	1e-05	0.0181357	0.00944667			YI_1182	0.961436	0.0162553	1e-05	0.0197264	0.00257233		1182	YI_1182	0.974509	0.0195169	1e-05	0.00596422		YI_1182	0.987502	1e-05	0.0124883		YI_1182	0.995957	0.00404344
E. Asian	YI_1188	0.963057	0.00716211	1e-05	1e-05	0.0240613	0.00569944			YI_1188	0.966527	0.00818889	1e-05	0.0252644	1e-05		1188	YI_1188	0.983877	0.0119787	1e-05	0.004134		YI_1188	0.992549	1e-05	0.00744111		YI_1188	0.999559	0.000440667
E. Asian	YI_1184	0.965394	0.0125291	1e-05	1e-05	0.00692033	0.0151366			YI_1184	0.968588	0.0135697	1e-05	0.00796389	0.00986911		1184	YI_1184	0.972762	0.0176552	1e-05	0.00957289		YI_1184	0.985898	1e-05	0.0140923		YI_1184	0.997179	0.00282144
E. Asian	YI_1181	0.967542	0.006883	1e-05	1e-05	0.0249074	0.000648333			YI_1181	0.969097	0.00638489	1e-05	0.0244976	1e-05		1181	YI_1181	0.987422	0.01075	1e-05	0.00181822		YI_1181	0.991337	1e-05	0.00865256		YI_1181	0.99986	0.000139889
E. Asian	YI_1186	0.968021	0.00615367	1e-05	1e-05	0.0159309	0.00987422			YI_1186	0.972831	0.00818889	1e-05	0.018082	0.000888667		1186	YI_1186	0.984501	0.0114352	1e-05	0.00405411		YI_1186	0.991352	0.000213333	0.00843467		YI_1186	0.995984	0.00401567
E. Asian	YI_1180	0.973271	0.0104622	1e-05	1e-05	0.0162361	1.05556e-05			YI_1180	0.97431	0.00977878	1e-05	0.0158916	1e-05		1180	YI_1180	0.986034	0.013946	1e-05	1e-05		YI_1180	0.999075	1e-05	0.000915		YI_1180	0.99999	1e-05
E. Asian	YI_1179	0.976114	0.005038	1.01111e-05	1e-05	0.0169447	0.00188333			YI_1179	0.97822	0.00483211	1e-05	0.0169282	1e-05		1179	YI_1179	0.99083	0.00914433	1e-05	1.56667e-05		YI_1179	0.993615	1e-05	0.00637456		YI_1179	0.999871	0.000129222
E. Asian	YI_1185	0.9786	0.00535867	1e-05	1e-05	0.00830989	0.00771133			YI_1185	0.981922	0.00614389	1e-05	0.009476	0.002448		1185	YI_1185	0.987941	0.0100973	1e-05	0.00195144		YI_1185	0.994495	1e-05	0.00549478		YI_1185	0.99999	1e-05
E. Asian	YI_1187	0.996674	1e-05	1e-05	1e-05	0.00328611	1e-05			YI_1187	0.997668	1.05556e-05	1e-05	0.00230189	1e-05		1187	YI_1187	0.99997	1e-05	1e-05	1e-05		YI_1187	0.99998	1e-05	1e-05		YI_1187	0.99999	1e-05
E. Asian	DAI_1315	0.963007	1e-05	1.04444e-05	1e-05	0.0265967	0.0103659			DAI_1315	0.967527	1.01111e-05	1e-05	0.0280773	0.00437611		1315	DAI_1315	0.989319	1e-05	1e-05	0.0106607		DAI_1315	0.981769	0.00231344	0.0159178		DAI_1315	0.988639	0.0113613
E. Asian	DAI_1310	0.96639	1e-05	1e-05	1e-05	0.0289953	0.00458411			DAI_1310	0.968502	1.04444e-05	1e-05	0.0288502	0.002627		1310	DAI_1310	0.990199	1e-05	1.11111e-05	0.00977989		DAI_1310	0.982477	0.00150367	0.0160197		DAI_1310	0.989192	0.010808
E. Asian	DAI_1313	0.968689	1e-05	1e-05	1.01111e-05	0.0221189	0.009162			DAI_1313	0.973257	1.07778e-05	1e-05	0.0234808	0.00324167		1313	DAI_1313	0.990508	1e-05	1.08889e-05	0.00947078		DAI_1313	0.988511	0.000353111	0.0111356		DAI_1313	0.994754	0.00524578
E. Asian	DAI_1311	0.969586	1e-05	1e-05	1e-05	0.0303743	1e-05			DAI_1311	0.970151	1.06667e-05	1e-05	0.0298181	1e-05		1311	DAI_1311	0.99596	1e-05	1.1e-05	0.004019		DAI_1311	0.988815	5.57778e-05	0.0111292		DAI_1311	0.994953	0.00504678
E. Asian	DAI_1307	0.970733	1e-05	1.01111e-05	1e-05	0.0265689	0.00266767			DAI_1307	0.972895	1.05556e-05	1e-05	0.027074	1e-05		1307	DAI_1307	0.994238	1e-05	1.1e-05	0.00574133		DAI_1307	0.988873	0.003725	0.00740167		DAI_1307	0.993022	0.00697767
E. Asian	DAI_1314	0.970853	1e-05	1e-05	1e-05	0.0257247	0.00339233			DAI_1314	0.973746	1.02222e-05	1e-05	0.0262236	1e-05		1314	DAI_1314	0.993738	0.00222256	1e-05	0.004029		DAI_1314	0.992874	0.000195	0.00693089		DAI_1314	0.997991	0.00200944
E. Asian	DAI_1308	0.971304	1e-05	1e-05	1.05556e-05	0.0158999	0.0127654			DAI_1308	0.977471	1e-05	1e-05	0.0183097	0.00419933		1308	DAI_1308	0.992182	1e-05	1e-05	0.007798		DAI_1308	0.985525	1e-05	0.0144648		DAI_1308	0.995376	0.00462356
E. Asian	DAI_1309	0.973828	1e-05	1.1e-05	1.13333e-05	0.02613	1e-05			DAI_1309	0.974471	1.12222e-05	1e-05	0.0254973	1e-05		1309	DAI_1309	0.99997	1e-05	1e-05	1e-05		DAI_1309	0.993077	0.00219311	0.00472978		DAI_1309	0.997347	0.00265311
E. Asian	DAI_1312	0.976923	1e-05	1e-05	1e-05	0.0207866	0.00226022			DAI_1312	0.978905	1.07778e-05	1e-05	0.0210638	1e-05		1312	DAI_1312	0.994687	0.00253478	1e-05	0.00276833		DAI_1312	0.993559	0.00261744	0.00382367		DAI_1312	0.997716	0.00228444
E. Asian	DAI_1316	0.978196	1e-05	1e-05	1e-05	0.019872	0.00190189			DAI_1316	0.980066	1e-05	1e-05	0.0199039	1e-05		1316	DAI_1316	0.999321	1e-05	1e-05	0.000658778		DAI_1316	0.994793	1e-05	0.00519678		DAI_1316	0.99999	1e-05
								1								1							1					1
C.S. Asian	UYG_1302	0.565537	0.0512297	1e-05	0.171275	0.00332278	0.208625			UYG_1302	0.585521	0.0594928	1e-05	0.0113812	0.343595		1302	UYG_1302	0.592652	0.062343	1e-05	0.344995		UYG_1302	0.651321	1e-05	0.348669		UYG_1302	0.750427	0.249573
C.S. Asian	UYG_1305	0.512852	0.0455019	1e-05	0.216311	3.47778e-05	0.22529			UYG_1305	0.532581	0.0545153	1e-05	0.00868544	0.404208		1305	UYG_1305	0.537344	0.05766	1e-05	0.404986		UYG_1305	0.590966	0.00118578	0.407848		UYG_1305	0.696404	0.303596
C.S. Asian	UYG_1304	0.524852	0.0334008	1e-05	0.204437	1e-05	0.23729			UYG_1304	0.550205	0.0432121	1e-05	0.00115656	0.405417		1304	UYG_1304	0.549773	0.046547	1e-05	0.40367		UYG_1304	0.592575	1e-05	0.407415		UYG_1304	0.700899	0.299101
C.S. Asian	UYG_1306	0.468071	0.0421381	1e-05	0.214702	0.00732133	0.267757			UYG_1306	0.49206	0.0531129	1e-05	0.0185232	0.436294		1306	UYG_1306	0.50406	0.0554644	1e-05	0.440466		UYG_1306	0.555579	1e-05	0.444411		UYG_1306	0.668782	0.331218
C.S. Asian	UYG_1303	0.415236	0.0331436	1e-05	0.254016	0.00979533	0.287799			UYG_1303	0.439979	0.044828	1e-05	0.0223253	0.492858		1303	UYG_1303	0.454477	0.0468554	1e-05	0.498657		UYG_1303	0.497071	1e-05	0.502919		UYG_1303	0.624107	0.375893
C.S. Asian	UYG_1299	0.455356	0.0422141	1e-05	0.211658	0.00135867	0.289404			UYG_1299	0.480669	0.0542346	1e-05	0.0142469	0.45084		1299	UYG_1299	0.489624	0.0566582	1e-05	0.453707		UYG_1299	0.542335	1e-05	0.457655		UYG_1299	0.665164	0.334836
C.S. Asian	UYG_1301	0.44668	0.0462228	1e-05	0.206716	0.0108824	0.289489			UYG_1301	0.473139	0.058523	1e-05	0.0225069	0.445821		1301	UYG_1301	0.487582	0.060814	1e-05	0.451594		UYG_1301	0.544319	1e-05	0.455671		UYG_1301	0.659083	0.340917
C.S. Asian	UYG_1297	0.422363	0.0411821	1e-05	0.221235	0.00197022	0.313239			UYG_1297	0.4513	0.0537298	1e-05	0.0147249	0.480235		1297	UYG_1297	0.460541	0.0560278	1e-05	0.483421		UYG_1297	0.511762	0.000466333	0.487772		UYG_1297	0.634845	0.365155
C.S. Asian	UYG_1300	0.408363	0.0534353	1e-05	0.221226	0.00347622	0.313489			UYG_1300	0.437361	0.0660853	1e-05	0.0165613	0.479982		1300	UYG_1300	0.447722	0.0684121	1e-05	0.483856		UYG_1300	0.512079	1e-05	0.487911		UYG_1300	0.639563	0.360437
C.S. Asian	UYG_1298	0.39512	0.0258414	1e-05	0.24304	0.00560533	0.330383			UYG_1298	0.42454	0.0395789	1e-05	0.0194776	0.516394		1298	UYG_1298	0.437209	0.0415271	1e-05	0.521254		UYG_1298	0.474857	1e-05	0.525133		UYG_1298	0.606792	0.393208
C. S. Asian	HAZ_112	0.515726	0.0412434	1e-05	0.178854	1e-05	0.264156			HAZ_112	0.541993	0.0523409	1e-05	0.00786256	0.397794		112	HAZ_112	0.546765	0.054899	1e-05	0.398326		HAZ_112	0.597958	0.000428667	0.401613		HAZ_112	0.702248	0.297752
C. S. Asian	HAZ_127	0.472503	0.0397418	1e-05	0.211955	0.00120744	0.274583			HAZ_127	0.497448	0.0510006	1e-05	0.0131722	0.438369		127	HAZ_127	0.505389	0.0537453	1e-05	0.440856		HAZ_127	0.555237	1e-05	0.444753		HAZ_127	0.669537	0.330463
C. S. Asian	HAZ_105	0.481322	0.0377489	1e-05	0.205657	1e-05	0.275251			HAZ_105	0.50659	0.0489338	1e-05	0.0109982	0.433468		105	HAZ_105	0.513115	0.0516074	1e-05	0.435267		HAZ_105	0.560986	0.000223667	0.43879		HAZ_105	0.671484	0.328516
C. S. Asian	HAZ_99	0.471781	0.0491274	1e-05	0.200314	0.00181433	0.276954			HAZ_99	0.497503	0.0606499	1e-05	0.0128542	0.428983		99	HAZ_99	0.505326	0.0633681	1e-05	0.431296		HAZ_99	0.564498	1e-05	0.435492		HAZ_99	0.677737	0.322263
C. S. Asian	HAZ_108	0.481879	0.0237616	1e-05	0.212275	1e-05	0.282065			HAZ_108	0.507681	0.0358357	1e-05	0.0104754	0.445997		108	HAZ_108	0.514082	0.0384372	1e-05	0.44747		HAZ_108	0.548903	1e-05	0.451087		HAZ_108	0.664902	0.335098
C. S. Asian	HAZ_103	0.47934	0.047286	1e-05	0.181785	0.00489622	0.286683			HAZ_103	0.505589	0.0596486	1e-05	0.0175056	0.417248		103	HAZ_103	0.516902	0.0619662	1e-05	0.421122		HAZ_103	0.574721	0.000647778	0.424631		HAZ_103	0.68304	0.31696
C. S. Asian	HAZ_116	0.471025	0.0436068	1e-05	0.1886	0.00291256	0.293846			HAZ_116	0.497107	0.056296	1e-05	0.0161984	0.430389		116	HAZ_116	0.507461	0.0586289	1e-05	0.4339		HAZ_116	0.562301	3.55556e-05	0.437663		HAZ_116	0.673948	0.326052
C. S. Asian	HAZ_102	0.474159	0.0260906	1e-05	0.199896	0.00559056	0.294253			HAZ_102	0.50052	0.038783	1e-05	0.0182086	0.442479		102	HAZ_102	0.512442	0.0410267	1e-05	0.446522		HAZ_102	0.549603	0.000217667	0.450179		HAZ_102	0.664071	0.335929
C. S. Asian	HAZ_109	0.45312	0.0422892	1e-05	0.194541	0.00989611	0.300143			HAZ_109	0.480482	0.0550152	1e-05	0.0228632	0.441629		109	HAZ_109	0.495266	0.0572389	1e-05	0.447485		HAZ_109	0.548385	1e-05	0.451605		HAZ_109	0.665036	0.334964
C. S. Asian	HAZ_125	0.472157	0.0296914	1e-05	0.193311	0.00381444	0.301016			HAZ_125	0.50036	0.042412	1e-05	0.017256	0.439962		125	HAZ_125	0.511136	0.0449282	1e-05	0.443926		HAZ_125	0.552202	0.000548	0.44725		HAZ_125	0.662931	0.337069
C. S. Asian	HAZ_121	0.481841	0.0171272	1e-05	0.180226	0.0128236	0.307972			HAZ_121	0.510426	0.0303944	1e-05	0.0269778	0.432192		121	HAZ_121	0.528352	0.0323926	1e-05	0.439246		HAZ_121	0.557232	1e-05	0.442758		HAZ_121	0.671091	0.328909
C. S. Asian	HAZ_120	0.453467	0.0267939	1e-05	0.208366	1e-05	0.311353			HAZ_120	0.482059	0.0399357	1e-05	0.0135429	0.464452		120	HAZ_120	0.490699	0.0421494	1e-05	0.467142		HAZ_120	0.529271	1e-05	0.470719		HAZ_120	0.649459	0.350541
C. S. Asian	HAZ_106	0.441337	0.0255869	1e-05	0.211159	0.00892322	0.312985			HAZ_106	0.470256	0.0386639	1e-05	0.0221031	0.468967		106	HAZ_106	0.48448	0.0408754	1e-05	0.474634		HAZ_106	0.521444	1e-05	0.478546		HAZ_106	0.640849	0.359151
C. S. Asian	HAZ_122	0.476266	0.0253456	1e-05	0.173555	0.0101066	0.314717			HAZ_122	0.505609	0.03911	1e-05	0.0243127	0.430959		122	HAZ_122	0.521614	0.0411781	1e-05	0.437198		HAZ_122	0.559438	1e-05	0.440552		HAZ_122	0.676645	0.323355
C. S. Asian	HAZ_115	0.47495	0.0428782	1e-05	0.161547	0.00149244	0.319123			HAZ_115	0.505201	0.0573542	1e-05	0.0150849	0.42235		115	HAZ_115	0.514721	0.05998	1e-05	0.42529		HAZ_115	0.570111	0.00182022	0.428069		HAZ_115	0.682788	0.317212
C. S. Asian	HAZ_124	0.435421	0.0417873	1e-05	0.195216	0.005917	0.321649			HAZ_124	0.46487	0.0555428	1e-05	0.0205117	0.459065		124	HAZ_124	0.477979	0.0577292	1e-05	0.464281		HAZ_124	0.531859	1e-05	0.468131		HAZ_124	0.650632	0.349368
C. S. Asian	HAZ_110	0.433971	0.0305402	1e-05	0.206251	0.00439589	0.324832			HAZ_110	0.46495	0.0445406	1e-05	0.0182206	0.472279		110	HAZ_110	0.476463	0.0469007	1e-05	0.476626		HAZ_110	0.519187	0.00115856	0.479654		HAZ_110	0.639381	0.360619
C. S. Asian	HAZ_118	0.438043	0.0275232	1e-05	0.176535	0.0111591	0.34673			HAZ_118	0.470823	0.0426026	0.000976889	0.026625	0.458973		118	HAZ_118	0.487744	0.0447512	0.00237444	0.465131		HAZ_118	0.527532	0.00428478	0.468184		HAZ_118	0.645501	0.354499
C. S. Asian	HAZ_119	0.40182	0.030844	1e-05	0.209256	0.00958456	0.348485			HAZ_119	0.433829	0.0454449	1e-05	0.0248478	0.495868		119	HAZ_119	0.44986	0.0474207	1e-05	0.502709		HAZ_119	0.493109	1e-05	0.506881		HAZ_119	0.622911	0.377089
C. S. Asian	HAZ_100	0.378177	0.0314398	1e-05	0.239828	0.001042	0.349503			HAZ_100	0.409303	0.04613	1e-05	0.0159289	0.528628		100	HAZ_100	0.419048	0.0484926	1e-05	0.532449		HAZ_100	0.463021	1e-05	0.536969		HAZ_100	0.598743	0.401257
C. S. Asian	HAZ_129	0.248426	0.0297896	1e-05	0.327427	0.0111768	0.38317			HAZ_129	0.281966	0.0443617	1e-05	0.0270144	0.646648		129	HAZ_129	0.299424	0.0456812	1e-05	0.654885		HAZ_129	0.340175	0.000318	0.659507		HAZ_129	0.497716	0.502284
C. S. Asian	HAZ_104	0.338506	0.039757	1e-05	0.225458	0.00328922	0.392979			HAZ_104	0.375078	0.0566186	0.001023	0.0198564	0.547424		104	HAZ_104	0.387535	0.058521	0.00178544	0.552158		HAZ_104	0.441119	0.003172	0.555709		HAZ_104	0.579138	0.420862
C.S. Asian	BUR_338	0.151631	0.0232796	1e-05	0.172098	0.0249642	0.628017			BUR_338	0.211524	0.0518397	0.004334	0.055116	0.677186		338	BUR_338	0.246914	0.0516436	0.00881833	0.692624		BUR_338	0.293623	0.00959778	0.696779		BUR_338	0.456963	0.543037
C.S. Asian	BUR_412	0.141459	0.0256623	1e-05	0.166161	0.0350951	0.631612			BUR_412	0.202141	0.0545188	5.12222e-05	0.0665882	0.676701		412	BUR_412	0.245469	0.0537359	0.00465711	0.696138		BUR_412	0.294118	0.00531767	0.700564		BUR_412	0.459747	0.540253
C.S. Asian	BUR_402	0.150866	0.0290106	1e-05	0.167013	0.0180034	0.635097			BUR_402	0.211326	0.0574924	0.00442256	0.0479609	0.678798		402	BUR_402	0.242371	0.0575617	0.00760444	0.692463		BUR_402	0.294821	0.00812578	0.697053		BUR_402	0.458129	0.541871
C.S. Asian	BUR_382	0.149317	0.0327584	1e-05	0.153517	0.0239218	0.640476			BUR_382	0.212164	0.0619944	0.00112011	0.0552213	0.669501		382	BUR_382	0.248273	0.0615714	0.00588322	0.684272		BUR_382	0.304518	0.00653144	0.688951		BUR_382	0.468461	0.531539
C.S. Asian	BUR_336	0.167291	0.0259128	1e-05	0.134679	0.0308154	0.641292			BUR_336	0.22869	0.0549991	0.00461767	0.0624682	0.649224		336	BUR_336	0.26939	0.0546406	0.00965133	0.666318		BUR_336	0.318757	0.0106351	0.670608		BUR_336	0.47696	0.52304
C.S. Asian	BUR_445	0.148578	0.0284177	1e-05	0.152539	0.0267148	0.64374			BUR_445	0.210617	0.0580844	0.00325156	0.057562	0.670485		445	BUR_445	0.2483	0.0578081	0.00678322	0.687108		BUR_445	0.300976	0.00728411	0.69174		BUR_445	0.466028	0.533972
C.S. Asian	BUR_351	0.150228	0.0219647	1e-05	0.155006	0.0257533	0.647038			BUR_351	0.211824	0.0524751	0.00203922	0.057808	0.675854		351	BUR_351	0.249447	0.0522131	0.00683067	0.691509		BUR_351	0.296501	0.00753867	0.695961		BUR_351	0.459837	0.540163
C.S. Asian	BUR_376	0.175143	0.0208832	1e-05	0.116181	0.0392368	0.648546			BUR_376	0.238197	0.0503203	0.00414133	0.0722224	0.635119		376	BUR_376	0.284966	0.0497838	0.0103679	0.654883		BUR_376	0.32953	0.0112716	0.659198		BUR_376	0.48495	0.51505
C.S. Asian	BUR_423	0.149272	0.0202208	1e-05	0.153427	0.0263293	0.65074			BUR_423	0.211932	0.0499149	0.003919	0.0577059	0.676529		423	BUR_423	0.249357	0.0494543	0.00902211	0.692166		BUR_423	0.293675	0.0100016	0.696324		BUR_423	0.455025	0.544975
C.S. Asian	BUR_356	0.148812	0.0171189	1e-05	0.153549	0.029355	0.651154			BUR_356	0.211315	0.0468058	1e-05	0.0618683	0.680001		356	BUR_356	0.252274	0.0462298	0.002486	0.69901		BUR_356	0.29333	0.00348178	0.703188		BUR_356	0.460722	0.539278
C.S. Asian	BUR_371	0.160672	0.0245054	1e-05	0.134721	0.0287197	0.651372			BUR_371	0.224478	0.0533571	0.00550044	0.0593974	0.657267		371	BUR_371	0.263226	0.0528539	0.0101574	0.673762		BUR_371	0.311143	0.0110902	0.677767		BUR_371	0.469778	0.530222
C.S. Asian	BUR_364	0.140031	0.0131472	1e-05	0.162996	0.0308443	0.652971			BUR_364	0.202674	0.0428771	0.00186967	0.0614987	0.69108		364	BUR_364	0.242505	0.0423748	0.00671467	0.708405		BUR_364	0.279672	0.00764567	0.712682		BUR_364	0.4448	0.5552
C.S. Asian	BUR_428	0.147209	0.0125197	1e-05	0.170606	0.016645	0.65301			BUR_428	0.208909	0.0427969	0.000943333	0.0484288	0.698922		428	BUR_428	0.240525	0.0426001	0.00474778	0.712127		BUR_428	0.27813	0.00562167	0.716248		BUR_428	0.44482	0.55518
C.S. Asian	BUR_341	0.146792	0.0260662	1e-05	0.142723	0.0301409	0.654269			BUR_341	0.211196	0.0559412	1e-05	0.0619856	0.670867		341	BUR_341	0.252193	0.0552764	0.00387311	0.688658		BUR_341	0.30237	0.00472756	0.692903		BUR_341	0.46513	0.53487
C.S. Asian	BUR_372	0.160973	0.022769	1e-05	0.14071	0.0182288	0.657309			BUR_372	0.227	0.0515219	1e-05	0.0511251	0.670343		372	BUR_372	0.260816	0.0514957	0.00121589	0.686472		BUR_372	0.307021	0.00215444	0.690824		BUR_372	0.471181	0.528819
C.S. Asian	BUR_407	0.164232	0.0224996	1e-05	0.125224	0.0292821	0.658752			BUR_407	0.230146	0.0513657	1e-05	0.0623997	0.656079		407	BUR_407	0.271267	0.0508992	0.00315689	0.674677		BUR_407	0.317097	0.00403556	0.678867		BUR_407	0.479149	0.520851
C.S. Asian	BUR_417	0.138024	0.0322006	1e-05	0.142129	0.0287989	0.658837			BUR_417	0.199314	0.0630609	0.00704844	0.0598384	0.670737		417	BUR_417	0.237733	0.0625651	0.0127307	0.686971		BUR_417	0.295307	0.0132961	0.691397		BUR_417	0.456228	0.543772
C.S. Asian	BUR_392	0.151215	0.0272488	1e-05	0.140175	0.0202211	0.66113			BUR_392	0.216107	0.0577018	1e-05	0.0528952	0.673286		392	BUR_392	0.252141	0.0573449	1e-05	0.690504		BUR_392	0.304558	0.000143667	0.695299		BUR_392	0.468183	0.531817
C.S. Asian	BUR_359	0.146498	0.0223273	1e-05	0.141658	0.0272847	0.662222			BUR_359	0.212138	0.052348	0.000574111	0.0597959	0.675144		359	BUR_359	0.250999	0.051816	0.00566122	0.691523		BUR_359	0.297467	0.006553	0.69598		BUR_359	0.459461	0.540539
C.S. Asian	BUR_346	0.156605	0.0133498	1e-05	0.14001	0.0261989	0.663826			BUR_346	0.221868	0.0438957	1e-05	0.0586419	0.675585		346	BUR_346	0.261498	0.0432891	0.00130567	0.693907		BUR_346	0.299752	0.002533	0.697715		BUR_346	0.465345	0.534655
C.S. Asian	BUR_438	0.13918	0.0227668	1e-05	0.152546	0.0215377	0.66396			BUR_438	0.204017	0.0528609	1e-05	0.0543908	0.688721		438	BUR_438	0.241026	0.0525017	1e-05	0.706462		BUR_438	0.288449	0.000197	0.711353		BUR_438	0.457012	0.542988
C.S. Asian	BUR_397	0.15543	0.0185082	0.00256578	0.135753	0.0222066	0.665537			BUR_397	0.219577	0.0495756	0.00805289	0.053877	0.668917		397	BUR_397	0.254618	0.0493762	0.0119418	0.684064		BUR_397	0.298768	0.0128394	0.688393		BUR_397	0.461641	0.538359
C.S. Asian	BUR_388	0.144441	0.0155301	1e-05	0.134791	0.026573	0.678654			BUR_388	0.210487	0.0457847	0.00493767	0.0598562	0.678935		388	BUR_388	0.249004	0.0454702	0.00959544	0.69593		BUR_388	0.289434	0.0105613	0.700005		BUR_388	0.45409	0.54591
C.S. Asian	BUR_433	0.117891	0.0240594	1e-05	0.153829	0.0247826	0.679428			BUR_433	0.182321	0.0548896	0.00557978	0.0580317	0.699178		433	BUR_433	0.219031	0.0545651	0.0106704	0.715734		BUR_433	0.268629	0.0110992	0.720272		BUR_433	0.438095	0.561905
C.S. Asian	BUR_444	0.139412	0.025616	1e-05	0.122022	0.0146071	0.698333			BUR_444	0.207464	0.0574864	0.00345656	0.0476478	0.683945		444	BUR_444	0.237696	0.0575168	0.00796856	0.696819		BUR_444	0.290171	0.00859156	0.701237		BUR_444	0.454708	0.545292
C.S. Asian	KAL_279	0.0287163	0.0228296	1e-05	0.0964187	0.0128413	0.839184			KAL_279	0.110771	0.0621917	1e-05	0.0541593	0.772868		279	KAL_279	0.147068	0.0613583	1e-05	0.791563		KAL_279	0.203163	1e-05	0.796827		KAL_279	0.38681	0.61319
C.S. Asian	KAL_307	0.00684989	0.0180853	1e-05	0.0465476	0.00656533	0.921942			KAL_307	0.0963924	0.060916	1e-05	0.05419	0.788492		307	KAL_307	0.133125	0.059714	1e-05	0.807151		KAL_307	0.187566	1e-05	0.812424		KAL_307	0.376858	0.623142
C.S. Asian	KAL_315	0.011226	8.53333e-05	1e-05	0.0403358	0.00742567	0.940917			KAL_315	0.106666	0.0439734	1e-05	0.0570152	0.792335		315	KAL_315	0.144847	0.0431106	1e-05	0.812033		KAL_315	0.182873	1e-05	0.817117		KAL_315	0.375502	0.624498
C.S. Asian	KAL_302	0.0153861	0.006283	1e-05	0.0280667	0.00559467	0.94466			KAL_302	0.107647	0.0532207	1e-05	0.0542771	0.784845		302	KAL_302	0.144584	0.0521054	1e-05	0.803301		KAL_302	0.191596	1e-05	0.808394		KAL_302	0.380018	0.619982
C.S. Asian	KAL_290	0.000796333	0.0144477	1e-05	0.0175858	0.00878067	0.958379			KAL_290	0.0956183	0.0619902	1e-05	0.0588804	0.783501		290	KAL_290	0.135758	0.0606049	1e-05	0.803627		KAL_290	0.191162	1e-05	0.808828		KAL_290	0.379768	0.620232
C.S. Asian	KAL_304	0.000682778	0.00777133	1e-05	0.0152012	0.009715	0.96662			KAL_304	0.0970682	0.0536609	1e-05	0.0605007	0.78876		304	KAL_304	0.138371	0.0523978	1e-05	0.809221		KAL_304	0.185639	1e-05	0.814351		KAL_304	0.376076	0.623924
C.S. Asian	KAL_298	0.00816478	0.00564867	1e-05	0.0132918	0.00592356	0.966961			KAL_298	0.105382	0.0499131	1e-05	0.0575207	0.787175		298	KAL_298	0.144771	0.0486969	1e-05	0.806521		KAL_298	0.188475	1e-05	0.811515		KAL_298	0.375724	0.624276
C.S. Asian	KAL_311	0.00964133	0.00458367	1e-05	0.0129411	0.00483344	0.96799			KAL_311	0.111068	0.0502332	1e-05	0.0541668	0.784521		311	KAL_311	0.148309	0.049195	1e-05	0.802486		KAL_311	0.192429	1e-05	0.807561		KAL_311	0.382029	0.617971
C.S. Asian	KAL_285	0.00264378	0.001693	1e-05	0.0223189	1e-05	0.973324			KAL_285	0.103163	0.0444084	1e-05	0.0501282	0.80229		285	KAL_285	0.136912	0.0436264	1e-05	0.819452		KAL_285	0.17556	1e-05	0.82443		KAL_285	0.365761	0.634239
C.S. Asian	KAL_309	0.00372533	0.00382256	1e-05	1e-05	0.00708478	0.985347			KAL_309	0.102643	0.054747	1e-05	0.058678	0.783922		309	KAL_309	0.14276	0.0533591	1e-05	0.803871		KAL_309	0.190995	1e-05	0.808995		KAL_309	0.378967	0.621033
C.S. Asian	KAL_333	1e-05	0.000729333	1e-05	0.00767533	0.00443733	0.987138			KAL_333	0.0894598	0.0501869	1e-05	0.0584104	0.801933		333	KAL_333	0.129441	0.0489793	1e-05	0.821569		KAL_333	0.173255	1e-05	0.826735		KAL_333	0.365263	0.634737
C.S. Asian	KAL_281	0.00316956	0.000182333	1e-05	1e-05	0.00346767	0.993161			KAL_281	0.104722	0.0485758	1e-05	0.0556951	0.790997		281	KAL_281	0.142937	0.0474878	1e-05	0.809565		KAL_281	0.185445	1e-05	0.814545		KAL_281	0.377341	0.622659
C.S. Asian	KAL_288	1e-05	1e-05	1e-05	1e-05	0.00614211	0.993818			KAL_288	0.095142	0.0508373	1e-05	0.0646249	0.789386		288	KAL_288	0.138185	0.0496534	1e-05	0.812152		KAL_288	0.18282	1e-05	0.81717		KAL_288	0.371743	0.628257
C.S. Asian	KAL_277	1e-05	0.00610744	1e-05	1e-05	1e-05	0.993853			KAL_277	0.0961494	0.0584299	1e-05	0.051601	0.79381		277	KAL_277	0.130887	0.0575766	1e-05	0.811527		KAL_277	0.183459	1e-05	0.816531		KAL_277	0.373698	0.626302
C.S. Asian	KAL_328	1e-05	0.00599733	1e-05	1e-05	1e-05	0.993963			KAL_328	0.0942209	0.0637768	1e-05	0.0479108	0.794082		328	KAL_328	0.126778	0.0627328	1e-05	0.810479		KAL_328	0.1843	1e-05	0.81569		KAL_328	0.375376	0.624624
C.S. Asian	KAL_274	0.001065	0.00454711	1e-05	1e-05	1e-05	0.994358			KAL_274	0.102059	0.052679	1e-05	0.0530336	0.792218		274	KAL_274	0.138325	0.0515503	1e-05	0.810114		KAL_274	0.184948	1e-05	0.815042		KAL_274	0.375283	0.624717
C.S. Asian	KAL_323	1e-05	1.8e-05	1.03333e-05	0.00410222	1e-05	0.995849			KAL_323	0.0841386	0.0555214	1e-05	0.0517987	0.808531		323	KAL_323	0.119089	0.0545962	1e-05	0.826304		KAL_323	0.168508	1e-05	0.831482		KAL_323	0.362366	0.637634
C.S. Asian	KAL_286	1e-05	6.95556e-05	1.01111e-05	1e-05	1e-05	0.99989			KAL_286	0.0970298	0.0549843	1e-05	0.0520312	0.795945		286	KAL_286	0.132137	0.0540402	1e-05	0.813812		KAL_286	0.181224	1e-05	0.818766		KAL_286	0.369697	0.630303
C.S. Asian	KAL_267	1e-05	1e-05	1e-05	1.11111e-05	1e-05	0.999949			KAL_267	0.10698	0.0444946	1e-05	0.0463448	0.802171		267	KAL_267	0.138491	0.0437518	1e-05	0.817747		KAL_267	0.177289	1e-05	0.822701		KAL_267	0.367792	0.632208
C.S. Asian	KAL_313	1e-05	1e-05	1e-05	1e-05	1e-05	0.99995			KAL_313	0.0991419	0.052583	1e-05	0.0576669	0.790598		313	KAL_313	0.138505	0.0515496	1e-05	0.809935		KAL_313	0.185133	1e-05	0.814857		KAL_313	0.374813	0.625187
C.S. Asian	KAL_319	1e-05	1e-05	1e-05	1e-05	1e-05	0.99995			KAL_319	0.108137	0.0475933	1e-05	0.0454251	0.798835		319	KAL_319	0.139032	0.0467309	1e-05	0.814227		KAL_319	0.180831	1e-05	0.819159		KAL_319	0.3718	0.6282
C.S. Asian	KAL_326	1e-05	1e-05	1e-05	1e-05	1e-05	0.99995			KAL_326	0.111924	0.045792	1e-05	0.0483584	0.793916		326	KAL_326	0.144562	0.0450134	1e-05	0.810414		KAL_326	0.184595	1e-05	0.815395		KAL_326	0.376711	0.623289
C.S. Asian	KAL_330	1e-05	1e-05	1e-05	1e-05	1e-05	0.99995			KAL_330	0.101429	0.0490354	1e-05	0.0529406	0.796585		330	KAL_330	0.137462	0.0480944	1e-05	0.814434		KAL_330	0.180599	1e-05	0.819391		KAL_330	0.371296	0.628704
C. S. Asian	PATH_214	0.0769373	0.0148442	0.00379844	0.315915	0.00913811	0.579366			PATH_214	0.127197	0.0385204	0.00852367	0.0342104	0.791548		214	PATH_214	0.148644	0.0387567	0.0108267	0.801773		PATH_214	0.182209	0.0111948	0.806597		PATH_214	0.365718	0.634282
C. S. Asian	PATH_226	0.0680698	0.0297477	1e-05	0.265539	0.0253834	0.611251			PATH_226	0.125609	0.0550667	0.00248967	0.0525889	0.764246		226	PATH_226	0.158784	0.0545489	0.00794644	0.778721		PATH_226	0.208158	0.00811967	0.783722		PATH_226	0.387479	0.612521
C. S. Asian	PATH_224	0.054513	0.0275879	1e-05	0.252975	0.0261717	0.638742			PATH_224	0.114163	0.0551559	1e-05	0.0561052	0.774566		224	PATH_224	0.150584	0.0544919	0.00337122	0.791553		PATH_224	0.199845	0.00348367	0.796671		PATH_224	0.384879	0.615121
C. S. Asian	PATH_218	0.0609866	0.0172379	1e-05	0.256046	0.0211716	0.644548			PATH_218	0.119921	0.0449553	0.00148867	0.0515417	0.782093		218	PATH_218	0.153195	0.0443996	0.00559	0.796815		PATH_218	0.192414	0.00597822	0.801608		PATH_218	0.375646	0.624354
C. S. Asian	PATH_262	0.0695463	0.0120832	1e-05	0.249509	0.0230164	0.645835			PATH_262	0.128328	0.0399971	0.00211633	0.0540867	0.775472		262	PATH_262	0.163538	0.0392692	0.00563867	0.791554		PATH_262	0.197664	0.00608056	0.796255		PATH_262	0.379758	0.620242
C. S. Asian	PATH_244	0.0751637	0.0252421	0.00136311	0.227938	0.0233594	0.646933			PATH_244	0.13422	0.0537868	0.00892167	0.0535658	0.749506		244	PATH_244	0.168874	0.0531053	0.0132856	0.764735		PATH_244	0.216847	0.0135516	0.769601		PATH_244	0.394183	0.605817
C. S. Asian	PATH_254	0.0673754	0.0174787	1e-05	0.248899	0.0157839	0.650453			PATH_254	0.128229	0.0438977	0.00282944	0.0444487	0.780596		254	PATH_254	0.156534	0.0437361	0.00646456	0.793265		PATH_254	0.195007	0.00686478	0.798128		PATH_254	0.377874	0.622126
C. S. Asian	PATH_264	0.0782748	0.0270903	1e-05	0.217908	0.0238808	0.652837			PATH_264	0.13911	0.0553974	0.00643	0.0529768	0.746085		264	PATH_264	0.173421	0.0548943	0.0110788	0.760605		PATH_264	0.223145	0.0113253	0.76553		PATH_264	0.399487	0.600513
C. S. Asian	PATH_213	0.0449274	0.0201368	1e-05	0.251587	0.024944	0.658394			PATH_213	0.107277	0.0472508	1e-05	0.0550707	0.790391		213	PATH_213	0.142427	0.0467574	0.00488633	0.805929		PATH_213	0.184063	0.00506189	0.810875		PATH_213	0.370813	0.629187
C. S. Asian	PATH_241	0.0530993	0.0139609	1e-05	0.25318	0.0209393	0.658811			PATH_241	0.113545	0.0431178	1e-05	0.051702	0.791625		241	PATH_241	0.147547	0.0426834	0.00101511	0.808754		PATH_241	0.185168	0.00127356	0.813559		PATH_241	0.372574	0.627426
C. S. Asian	PATH_228	0.0754957	0.0179168	0.00259078	0.215411	0.0276622	0.660924			PATH_228	0.137011	0.0470186	0.00896922	0.0574247	0.749576		228	PATH_228	0.173824	0.0463076	0.0138319	0.766037		PATH_228	0.214981	0.0142424	0.770777		PATH_228	0.39283	0.60717
C. S. Asian	PATH_259	0.0516341	0.0204986	1e-05	0.250275	0.0120393	0.665543			PATH_259	0.113935	0.0496427	0.00158056	0.0427367	0.792105		259	PATH_259	0.141155	0.0493514	0.00448711	0.805006		PATH_259	0.185403	0.004622	0.809975		PATH_259	0.370258	0.629742
C. S. Asian	PATH_243	0.0458892	0.0191312	1e-05	0.261695	0.00757711	0.665698			PATH_243	0.104962	0.0473642	0.00278944	0.0376923	0.807192		243	PATH_243	0.128921	0.0472841	0.00594644	0.817848		PATH_243	0.171171	0.00599278	0.822836		PATH_243	0.358286	0.641714
C. S. Asian	PATH_216	0.0668839	0.0220757	1e-05	0.215824	0.0261521	0.669054			PATH_216	0.131073	0.0515697	0.00243533	0.0573928	0.75753		216	PATH_216	0.168594	0.0507876	0.00643411	0.774185		PATH_216	0.214165	0.00675756	0.779078		PATH_216	0.394294	0.605706
C. S. Asian	PATH_222	0.0572054	0.0266218	1e-05	0.20966	0.0340868	0.672416			PATH_222	0.121324	0.0564089	0.00475156	0.0644894	0.753027		222	PATH_222	0.162626	0.05551	0.0104022	0.771462		PATH_222	0.212922	0.0105261	0.776552		PATH_222	0.391833	0.608167
C. S. Asian	PATH_230	0.065508	0.021635	1e-05	0.209067	0.0296652	0.674115			PATH_230	0.127684	0.0511127	0.005167	0.0630418	0.752994		230	PATH_230	0.168731	0.0501479	0.00966278	0.771458		PATH_230	0.213724	0.00997789	0.776298		PATH_230	0.395554	0.604446
C. S. Asian	PATH_237	0.108423	0.00660778	0.00732078	0.164264	0.0371021	0.676282			PATH_237	0.176594	0.0344849	0.01341	0.0698722	0.705639		237	PATH_237	0.221671	0.0335221	0.0192844	0.725523		PATH_237	0.250001	0.020201	0.729798		PATH_237	0.420061	0.579939
C. S. Asian	PATH_234	0.0726897	0.023178	1e-05	0.206296	0.0214677	0.676359			PATH_234	0.137404	0.0528036	1e-05	0.0544362	0.755345		234	PATH_234	0.174389	0.0521309	1e-05	0.77347		PATH_234	0.221431	1e-05	0.778559		PATH_234	0.403752	0.596248
C. S. Asian	PATH_258	0.0874546	0.0157238	0.000439222	0.178582	0.0355443	0.682256			PATH_258	0.153443	0.0463338	0.00818656	0.0682862	0.723751		258	PATH_258	0.198082	0.0453417	0.014166	0.74241		PATH_258	0.238312	0.0147804	0.746907		PATH_258	0.41182	0.58818
C. S. Asian	PATH_251	0.0790106	0.00923744	0.00149333	0.199981	0.0237329	0.686545			PATH_251	0.142907	0.0386384	0.00862378	0.0555354	0.754295		251	PATH_251	0.178169	0.0382057	0.013813	0.769812		PATH_251	0.211241	0.0145459	0.774213		PATH_251	0.387244	0.612756
C. S. Asian	PATH_239	0.101694	0.00972111	1e-05	0.126766	0.0440236	0.717785			PATH_239	0.170948	0.0429148	0.00904	0.0787284	0.698369		239	PATH_239	0.221755	0.0415673	0.0165171	0.720161		PATH_239	0.258045	0.0175247	0.724431		PATH_239	0.424637	0.575363
C. S. Asian	PATH_232	0.0545957	0.0225749	1e-05	0.175434	0.0267609	0.720625			PATH_232	0.12288	0.0554936	0.00525767	0.0595848	0.756784		232	PATH_232	0.161454	0.0545756	0.0104661	0.773504		PATH_232	0.210941	0.0106193	0.77844		PATH_232	0.388186	0.611814
C.S. Asian	SIND_175	0.0388526	0.00703922	0.411546	0.0993297	0.0209203	0.422312			SIND_175	0.078606	0.0263766	0.41727	0.0410686	0.436679		175	SIND_175	0.104387	0.025851	0.421731	0.448031		SIND_175	0.127205	0.421703	0.451092		SIND_175	0.211672	0.788328
C.S. Asian	SIND_173	0.0503209	0.0143662	0.137096	0.149834	0.0291849	0.619198			SIND_173	0.108243	0.0420932	0.144269	0.059143	0.646252		173	SIND_173	0.145892	0.0411816	0.150005	0.662922		SIND_173	0.182764	0.150195	0.667041		SIND_173	0.328389	0.671611
C.S. Asian	SIND_197	0.0757878	0.0234444	1e-05	0.19666	0.029142	0.674956			SIND_197	0.142661	0.0522621	0.00330478	0.0617963	0.739976		197	SIND_197	0.182731	0.0514648	0.00825467	0.75755		SIND_197	0.229015	0.00856811	0.762417		SIND_197	0.405459	0.594541
C.S. Asian	SIND_177	0.0721652	0.000729444	0.090703	0.129042	0.0300252	0.677335			SIND_177	0.135727	0.0322894	0.0986132	0.0624597	0.670911		177	SIND_177	0.175791	0.0314156	0.104578	0.688216		SIND_177	0.202611	0.105253	0.692136		SIND_177	0.357087	0.642913
C.S. Asian	SIND_185	0.0633042	0.0137163	0.00548111	0.19778	0.0336532	0.686065			SIND_185	0.126713	0.0441306	0.0112227	0.0658196	0.752115		185	SIND_185	0.16913	0.0430697	0.0170424	0.770757		SIND_185	0.20701	0.0174868	0.775503		SIND_185	0.384694	0.615306
C.S. Asian	SIND_208	0.0755328	0.0153576	1e-05	0.185825	0.0364588	0.686816			SIND_208	0.139413	0.0453291	0.00703422	0.0694992	0.738725		208	SIND_208	0.184338	0.0442083	0.01294	0.758514		SIND_208	0.223256	0.0134412	0.763302		SIND_208	0.398919	0.601081
C.S. Asian	SIND_191	0.0737326	0.0109201	1e-05	0.192692	0.028165	0.69448			SIND_191	0.142217	0.0388041	0.00229011	0.0613843	0.755304		191	SIND_191	0.181407	0.03808	0.00741444	0.773099		SIND_191	0.214353	0.00807667	0.777571		SIND_191	0.395086	0.604914
C.S. Asian	SIND_201	0.0644721	0.0199332	0.00243322	0.180677	0.0335807	0.698904			SIND_201	0.128216	0.0520153	0.0108654	0.0666241	0.742279		201	SIND_201	0.170666	0.0509618	0.0173277	0.761045		SIND_201	0.216529	0.0176408	0.765831		SIND_201	0.390842	0.609158
C.S. Asian	SIND_189	0.066433	0.01577	1e-05	0.179113	0.0375783	0.701096			SIND_189	0.132484	0.0465123	0.00509744	0.0723654	0.743541		189	SIND_189	0.17957	0.0450864	0.0113251	0.764018		SIND_189	0.219364	0.0118224	0.768813		SIND_189	0.397205	0.602795
C.S. Asian	SIND_165	0.0734196	0.00935522	0.0427478	0.140738	0.0288954	0.704844			SIND_165	0.141116	0.0408817	0.0498776	0.0631547	0.70497		165	SIND_165	0.182237	0.0398651	0.0553539	0.722544		SIND_165	0.216904	0.0559511	0.727144		SIND_165	0.384619	0.615381
C.S. Asian	SIND_206	0.103815	0.0135582	0.00417267	0.135437	0.0349363	0.708081			SIND_206	0.170588	0.0460018	0.0126829	0.067703	0.703024		206	SIND_206	0.214661	0.0448386	0.0183121	0.722188		SIND_206	0.254233	0.0190486	0.726718		SIND_206	0.423567	0.576433
C.S. Asian	SIND_183	0.0735247	0.0108494	0.00622889	0.158114	0.0425544	0.708728			SIND_183	0.141249	0.0434981	0.0129589	0.0767839	0.72551		183	SIND_183	0.190745	0.0421279	0.0196809	0.747446		SIND_183	0.227804	0.0203259	0.75187		SIND_183	0.401322	0.598678
C.S. Asian	SIND_210	0.0747817	0.0139153	0.00129989	0.165425	0.0341794	0.710398			SIND_210	0.14165	0.0459009	0.00994389	0.0668954	0.73561		210	SIND_210	0.184938	0.0448589	0.0162592	0.753944		SIND_210	0.224618	0.0168383	0.758543		SIND_210	0.399157	0.600843
C.S. Asian	SIND_187	0.0746279	0.0138911	0.00305144	0.170678	0.0260687	0.711683			SIND_187	0.143865	0.0436759	0.0103469	0.060751	0.741361		187	SIND_187	0.182755	0.042983	0.0157183	0.758543		SIND_187	0.220573	0.0162163	0.76321		SIND_187	0.396505	0.603495
C.S. Asian	SIND_167	0.0759059	0.00357689	0.0139878	0.156437	0.036055	0.714038			SIND_167	0.144567	0.035826	0.0210627	0.0725208	0.726024		167	SIND_167	0.191176	0.0344611	0.02747	0.746893		SIND_167	0.220326	0.0282189	0.751454		SIND_167	0.392613	0.607387
C.S. Asian	SIND_205	0.0747959	0.00534122	0.00104811	0.175524	0.0286928	0.714598			SIND_205	0.142853	0.0360261	0.00877333	0.0627612	0.749587		205	SIND_205	0.183107	0.035225	0.0143169	0.767351		SIND_205	0.213065	0.0151354	0.771799		SIND_205	0.390512	0.609488
C.S. Asian	SIND_171	0.0595116	0.0157318	1e-05	0.165968	0.0373514	0.721427			SIND_171	0.126089	0.0487512	0.00612978	0.072923	0.746107		171	SIND_171	0.172696	0.0474761	0.0123743	0.767454		SIND_171	0.215094	0.0127798	0.772127		SIND_171	0.394329	0.605671
C.S. Asian	SIND_195	0.0808609	0.015181	0.00446956	0.133781	0.0386344	0.727072			SIND_195	0.152659	0.0492428	0.0120237	0.0730416	0.713033		195	SIND_195	0.200114	0.0480628	0.0184617	0.733362		SIND_195	0.242974	0.0189696	0.738057		SIND_195	0.414447	0.585553
C.S. Asian	SIND_163	0.0475929	0.00481144	0.0570038	0.128585	0.0334618	0.728544			SIND_163	0.116088	0.0373191	0.0641878	0.0701349	0.71227		163	SIND_163	0.161669	0.0357038	0.0705017	0.732126		SIND_163	0.192255	0.0710807	0.736665		SIND_163	0.36058	0.63942
C.S. Asian	SIND_169	0.0728238	0.00963478	0.00571222	0.137781	0.0389393	0.735109			SIND_169	0.145895	0.0412847	0.0136922	0.074291	0.724837		169	SIND_169	0.193488	0.0401813	0.0212063	0.745124		SIND_169	0.228359	0.0220899	0.749552		SIND_169	0.401923	0.598077
C.S. Asian	SIND_181	0.0727462	0.009579	1e-05	0.149618	0.0264451	0.741602			SIND_181	0.144398	0.0412632	0.00661089	0.0629078	0.74482		181	SIND_181	0.185178	0.0403063	0.011942	0.762573		SIND_181	0.220348	0.0125179	0.767135		SIND_181	0.398893	0.601107
C.S. Asian	SIND_199	0.0245303	0.00369756	0.00700922	0.199277	0.0164998	0.748987			SIND_199	0.092977	0.0356051	0.0149277	0.0503261	0.806165		199	SIND_199	0.125092	0.0348313	0.0195093	0.820568		SIND_199	0.154709	0.0198668	0.825425		SIND_199	0.339629	0.660371
C.S. Asian	SIND_192	0.0676604	0.011196	0.002954	0.128883	0.0306203	0.758686			SIND_192	0.141541	0.045307	0.0106646	0.0684238	0.734064		192	SIND_192	0.185059	0.0445684	0.0173643	0.753008		SIND_192	0.224552	0.0180128	0.757436		SIND_192	0.399124	0.600876
C.S. Asian	SIND_179	0.052808	0.0131809	0.00230544	0.132965	0.0311688	0.767571			SIND_179	0.127454	0.046172	0.0118407	0.0671443	0.747389		179	SIND_179	0.170489	0.0451763	0.0181721	0.766162		SIND_179	0.210467	0.0186326	0.770901		SIND_179	0.38457	0.61543
C.S. Asian	BALO_57	0.0107311	0.0218491	0.161692	0.264009	0.00531844	0.536401			BALO_57	0.0571022	0.0434587	0.166973	0.0303871	0.702079		57	BALO_57	0.0755933	0.043403	0.169452	0.711551		BALO_57	0.114877	0.168945	0.716178		BALO_57	0.270523	0.729477
C.S. Asian	BALO_60	0.0170796	0.000258667	0.12583	0.236712	0.0203971	0.599722			BALO_60	0.0706634	0.0243731	0.132085	0.0476989	0.725179		60	BALO_60	0.100988	0.0236208	0.136416	0.738976		BALO_60	0.11998	0.136722	0.743298		BALO_60	0.281232	0.718768
C.S. Asian	BALO_76	0.0261252	0.00117156	0.0975496	0.26082	0.0114287	0.602905			BALO_76	0.0786049	0.0244713	0.103148	0.0400961	0.75368		76	BALO_76	0.103982	0.0240377	0.106548	0.765431		BALO_76	0.123142	0.106809	0.770049		BALO_76	0.291907	0.708093
C.S. Asian	BALO_78	0.0214321	0.00281056	0.04917	0.271637	0.002161	0.652789			BALO_78	0.0805348	0.028483	0.0548412	0.0319781	0.804163		78	BALO_78	0.100603	0.0285063	0.056997	0.813894		BALO_78	0.124278	0.0572159	0.818506		BALO_78	0.308636	0.691364
C.S. Asian	BALO_68	0.0721958	0.00785711	0.00141922	0.238297	0.0181019	0.662129			BALO_68	0.13191	0.0364867	0.00784244	0.048211	0.77555		68	BALO_68	0.16278	0.0360096	0.0115916	0.789619		BALO_68	0.193579	0.0121569	0.794264		BALO_68	0.377329	0.622671
C.S. Asian	BALO_62	0.0109527	0.00235489	0.0218262	0.278392	0.0208829	0.665591			BALO_62	0.0703588	0.0279827	0.0264868	0.0518151	0.823357		62	BALO_62	0.103248	0.0272459	0.0303233	0.839182		BALO_62	0.125466	0.0306813	0.843852		BALO_62	0.316829	0.683171
C.S. Asian	BALO_82	0.0200982	0.0163192	1e-05	0.261307	0.0196769	0.682589			BALO_82	0.0819821	0.044842	0.00382022	0.0502961	0.81906		82	BALO_82	0.113868	0.0445276	0.00750533	0.834099		BALO_82	0.153174	0.00754544	0.83928		BALO_82	0.345045	0.654955
C.S. Asian	BALO_64	0.0137762	0.00850678	0.0128967	0.276606	0.00522189	0.682993			BALO_64	0.0747777	0.0357699	0.0188683	0.0373242	0.83326		64	BALO_64	0.0986283	0.0355192	0.0213331	0.844519		BALO_64	0.129078	0.0214417	0.849481		BALO_64	0.319733	0.680267
C.S. Asian	BALO_98	0.03739	1e-05	0.0390323	0.220933	0.0139818	0.688653			BALO_98	0.1052	0.0222272	0.045033	0.0462287	0.781311		98	BALO_98	0.134729	0.0217358	0.0487007	0.794834		BALO_98	0.151542	0.0493797	0.799078		BALO_98	0.33059	0.66941
C.S. Asian	BALO_56	0.0749928	0.00223367	0.006852	0.190375	0.0267256	0.698821			BALO_56	0.14008	0.033449	0.0130077	0.0604132	0.75305		56	BALO_56	0.178901	0.032754	0.0174434	0.770902		BALO_56	0.20641	0.0181211	0.775469		BALO_56	0.384525	0.615475
C.S. Asian	BALO_54	0.00634922	0.00401267	1e-05	0.278364	0.0113257	0.699939			BALO_54	0.068857	0.0308051	0.00558822	0.0427498	0.852		54	BALO_54	0.0969266	0.030223	0.00829411	0.864556		BALO_54	0.122063	0.00848789	0.869449		BALO_54	0.318463	0.681537
C.S. Asian	BALO_94	0.0302301	0.00864456	0.0125759	0.223798	0.0195089	0.705243			BALO_94	0.0965613	0.0366789	0.0185211	0.0514778	0.796761		94	BALO_94	0.129298	0.0361301	0.0226939	0.811878		BALO_94	0.160371	0.0229953	0.816634		BALO_94	0.343643	0.656357
C.S. Asian	BALO_80	0.016148	0.00422911	0.0154511	0.250807	0.00709111	0.706274			BALO_80	0.0800849	0.0332844	0.0225829	0.0394564	0.824591		80	BALO_80	0.105126	0.0328883	0.025535	0.83645		BALO_80	0.132949	0.0258177	0.841233		BALO_80	0.320605	0.679395
C.S. Asian	BALO_70	0.137844	0.0116142	0.000508778	0.0858673	0.0561821	0.707984			BALO_70	0.208028	0.0444422	0.00884756	0.0925028	0.646179		70	BALO_70	0.268039	0.0429129	0.01737	0.671678		BALO_70	0.305605	0.018529	0.675866		BALO_70	0.461882	0.538118
C.S. Asian	BALO_88	0.0175983	0.007643	0.009595	0.245993	0.00939322	0.709778			BALO_88	0.0804842	0.0381758	0.0154516	0.0422679	0.823621		88	BALO_88	0.107299	0.0378416	0.0185247	0.836335		BALO_88	0.140099	0.018666	0.841235		BALO_88	0.331578	0.668422
C.S. Asian	BALO_66	0.0119786	0.009478	0.00210311	0.249215	0.015594	0.711631			BALO_66	0.0757168	0.0387478	0.00830833	0.04957	0.827657		66	BALO_66	0.107118	0.0379092	0.0127149	0.842258		BALO_66	0.1398	0.0129167	0.847284		BALO_66	0.331122	0.668878
C.S. Asian	BALO_92	0.0385943	0.00361678	0.00970544	0.2027	0.028761	0.716623			BALO_92	0.106156	0.0338069	0.0166389	0.0617254	0.781673		92	BALO_92	0.145413	0.0330806	0.0220298	0.799476		BALO_92	0.17331	0.0225578	0.804132		BALO_92	0.354472	0.645528
C.S. Asian	BALO_74	0.0246432	1e-05	0.00383467	0.239283	0.00860289	0.723626			BALO_74	0.096551	0.0218563	0.0107827	0.0410917	0.829719		74	BALO_74	0.122623	0.0216957	0.013279	0.842402		BALO_74	0.138835	0.0137729	0.847392		BALO_74	0.33019	0.66981
C.S. Asian	BALO_96	0.0298957	0.00310056	0.0179778	0.208509	0.0153898	0.725127			BALO_96	0.0977402	0.0318978	0.0231786	0.0504133	0.79677		96	BALO_96	0.130317	0.0311043	0.0270347	0.811544		BALO_96	0.156063	0.0274519	0.816485		BALO_96	0.339062	0.660938
C.S. Asian	BALO_72	0.00972022	0.0129402	0.0112111	0.222849	0.0150303	0.728249			BALO_72	0.0761769	0.042272	0.0178894	0.0490884	0.814574		72	BALO_72	0.107439	0.0415859	0.0221407	0.828835		BALO_72	0.143856	0.0222894	0.833855		BALO_72	0.331378	0.668622
C.S. Asian	BALO_52	0.0173352	0.00394967	0.00301378	0.232267	0.0139731	0.729461			BALO_52	0.0833693	0.034052	0.0105967	0.0464981	0.825484		52	BALO_52	0.113176	0.0333099	0.0144811	0.839033		BALO_52	0.141407	0.0147693	0.843824		BALO_52	0.330442	0.669558
C.S. Asian	BALO_58	0.0377959	0.00513189	0.001519	0.200805	0.020575	0.734173			BALO_58	0.103481	0.0371451	0.00900556	0.0553918	0.794976		58	BALO_58	0.139614	0.0361101	0.0129722	0.811303		BALO_58	0.170486	0.0133204	0.816193		BALO_58	0.355445	0.644555
C.S. Asian	BALO_90	0.0473839	1e-05	0.0238673	0.184223	0.00890556	0.73561			BALO_90	0.119411	0.0281329	0.0314058	0.0418631	0.779187		90	BALO_90	0.146507	0.027683	0.0345643	0.791246		BALO_90	0.16931	0.0350827	0.795607		BALO_90	0.3486	0.6514
C.S. Asian	BALO_86	0.0103538	0.00187333	7.35556e-05	0.230106	0.00504967	0.752544			BALO_86	0.0775373	0.0339848	0.00771644	0.0406426	0.840119		86	BALO_86	0.103099	0.0334969	0.0105509	0.852853		BALO_86	0.131381	0.0107874	0.857832		BALO_86	0.324315	0.675685
C.S. Asian	MAK_130	0.0275336	0.0137674	0.386465	0.168122	0.007448	0.396664			MAK_130	0.0637287	0.0305751	0.391109	0.0256599	0.488928		130	MAK_130	0.0796479	0.0305684	0.393516	0.496268		MAK_130	0.10709	0.393084	0.499826		MAK_130	0.202732	0.797268
C.S. Asian	MAK_150	0.0288828	1e-05	0.20483	0.236983	0.00870378	0.52059			MAK_150	0.0777009	0.0200097	0.210109	0.032444	0.659736		150	MAK_150	0.097966	0.0199373	0.212952	0.669144		MAK_150	0.113754	0.213253	0.672993		MAK_150	0.256265	0.743735
C.S. Asian	MAK_139	1e-05	0.00436833	0.131816	0.244557	0.011525	0.607724			MAK_139	0.049911	0.031507	0.137997	0.0393889	0.741195		139	MAK_139	0.0746589	0.0310072	0.141416	0.752918		MAK_139	0.101302	0.141196	0.757502		MAK_139	0.265844	0.734156
C.S. Asian	MAK_140	0.0250374	0.00361111	0.0594483	0.255332	0.0170293	0.639541			MAK_140	0.0822261	0.0314469	0.065021	0.0452986	0.776007		140	MAK_140	0.111269	0.0308947	0.0688419	0.788995		MAK_140	0.137213	0.0690502	0.793737		MAK_140	0.315145	0.684855
C.S. Asian	MAK_149	0.0701192	0.00266567	0.0737069	0.180257	0.0254463	0.647805			MAK_149	0.13187	0.0304938	0.0809579	0.0546114	0.702067		149	MAK_149	0.166835	0.029913	0.0859627	0.717289		MAK_149	0.191846	0.0865337	0.72162		MAK_149	0.351995	0.648005
C.S. Asian	MAK_153	0.00747378	1e-05	0.0797114	0.25847	0.00515244	0.649183			MAK_153	0.0742236	0.0146998	0.0860313	0.0349401	0.790105		153	MAK_153	0.0961721	0.0145326	0.0886521	0.800643		MAK_153	0.105531	0.0891741	0.805295		MAK_153	0.284648	0.715352
C.S. Asian	MAK_146	0.00601856	0.00112467	0.0335229	0.303823	0.00533267	0.650178			MAK_146	0.0598279	0.0268222	0.0381957	0.0331691	0.841985		146	MAK_146	0.0810294	0.0265177	0.0406159	0.851837		MAK_146	0.10277	0.0407408	0.856489		MAK_146	0.292053	0.707947
C.S. Asian	MAK_141	0.0190603	1e-05	0.0560737	0.268343	0.00424311	0.65227			MAK_141	0.0777578	0.0259576	0.0610156	0.033081	0.802188		141	MAK_141	0.0987452	0.0258738	0.0634294	0.811951		MAK_141	0.119755	0.0637536	0.816491		MAK_141	0.303296	0.696704
C.S. Asian	MAK_145	0.0107687	0.00643289	0.0528122	0.257769	0.0111279	0.661089			MAK_145	0.0702344	0.0338782	0.0586392	0.0413359	0.795912		145	MAK_145	0.0965161	0.0332867	0.0620224	0.808175		MAK_145	0.124868	0.062116	0.813016		MAK_145	0.30704	0.69296
C.S. Asian	MAK_136	0.0243362	0.00286122	0.0449654	0.253153	0.0123173	0.662367			MAK_136	0.0840443	0.0297903	0.0512424	0.0428486	0.792075		136	MAK_136	0.111158	0.0293591	0.054504	0.804979		MAK_136	0.135363	0.0548279	0.809809		MAK_136	0.316157	0.683843
C.S. Asian	MAK_151	0.0103166	0.00609056	0.0589048	0.245778	0.0152833	0.663626			MAK_151	0.0687329	0.0341942	0.063989	0.0450106	0.788074		151	MAK_151	0.0970492	0.0335064	0.0676082	0.801836		MAK_151	0.12559	0.0677374	0.806673		MAK_151	0.304584	0.695416
C.S. Asian	MAK_134	0.004935	1e-05	0.0684286	0.250268	0.0115541	0.664804			MAK_134	0.0677448	0.0231438	0.0747896	0.0425916	0.79173		134	MAK_134	0.094421	0.0226604	0.0783396	0.804579		MAK_134	0.11216	0.0786081	0.809232		MAK_134	0.291098	0.708902
C.S. Asian	MAK_131	1e-05	0.008443	0.0260199	0.269054	0.0192322	0.677241			MAK_131	0.0573049	0.0353877	0.0317353	0.0499078	0.825665		131	MAK_131	0.0895346	0.0345844	0.0356394	0.840241		MAK_131	0.119074	0.0357748	0.845151		MAK_131	0.306128	0.693872
C.S. Asian	MAK_155	0.00350033	0.00285089	0.0241543	0.280342	0.00451833	0.684634			MAK_155	0.0627204	0.0300546	0.029448	0.0347974	0.842979		155	MAK_155	0.0844558	0.0299158	0.0316207	0.854008		MAK_155	0.109394	0.0317317	0.858874		MAK_155	0.304408	0.695592
C.S. Asian	MAK_157	1e-05	1e-05	0.0433107	0.255014	0.016748	0.684907			MAK_157	0.0625167	0.0233049	0.0492197	0.049627	0.815332		157	MAK_157	0.0941743	0.0225133	0.0533857	0.829926		MAK_157	0.111563	0.0537284	0.834709		MAK_157	0.298013	0.701987
C.S. Asian	MAK_148	0.0109956	0.00381889	0.0469066	0.248129	0.00466256	0.685488			MAK_148	0.0734894	0.0328332	0.0523078	0.0355883	0.805781		148	MAK_148	0.0958846	0.0326046	0.054999	0.816512		MAK_148	0.12358	0.0551061	0.821314		MAK_148	0.309663	0.690337
C.S. Asian	MAK_161	0.00713522	0.00108111	0.0503599	0.245536	0.00997722	0.685911			MAK_161	0.0685797	0.0298757	0.0559783	0.0406658	0.804901		161	MAK_161	0.0945267	0.0293909	0.0591577	0.816925		MAK_161	0.119066	0.0593132	0.821621		MAK_161	0.302547	0.697453
C.S. Asian	MAK_160	0.0223252	1e-05	0.0258177	0.257689	0.00544033	0.688717			MAK_160	0.0847883	0.027699	0.0319747	0.0365927	0.818945		160	MAK_160	0.108067	0.0274856	0.0346251	0.829823		MAK_160	0.130539	0.0349263	0.834534		MAK_160	0.31951	0.68049
C.S. Asian	MAK_137	1e-05	0.00216433	0.0302611	0.252865	0.0224467	0.692252			MAK_137	0.060583	0.0297619	0.0357077	0.0549879	0.81896		137	MAK_137	0.0957652	0.0290342	0.0401704	0.83503		MAK_137	0.119601	0.0403866	0.840013		MAK_137	0.310388	0.689612
C.S. Asian	MAK_144	0.005309	1e-05	0.0383389	0.252016	0.0103911	0.693934			MAK_144	0.0715646	0.023679	0.0445588	0.0423066	0.817891		144	MAK_144	0.0986091	0.0231953	0.0479462	0.83025		MAK_144	0.116606	0.0482124	0.835182		MAK_144	0.303415	0.696585
C.S. Asian	MAK_133	0.0129523	1e-05	0.0225103	0.255523	0.00748944	0.701515			MAK_133	0.077352	0.0256383	0.0280831	0.0385751	0.830352		133	MAK_133	0.102349	0.025194	0.030736	0.84172		MAK_133	0.122543	0.0309984	0.846459		MAK_133	0.315038	0.684962
C.S. Asian	MAK_143	0.0604267	0.00999378	0.0483916	0.156162	0.0206152	0.70441			MAK_143	0.128112	0.0422118	0.0559062	0.0528602	0.72091		143	MAK_143	0.162243	0.0415907	0.0604266	0.735739		MAK_143	0.199068	0.0607471	0.740185		MAK_143	0.367979	0.632021
C.S. Asian	MAK_154	1e-05	0.000746667	0.0365336	0.244551	0.0121777	0.705981			MAK_154	0.0495359	0.0351362	0.0433429	0.0479239	0.824061		154	MAK_154	0.0798929	0.0342489	0.0473264	0.838532		MAK_154	0.109215	0.0473154	0.84347		MAK_154	0.298471	0.701529
C.S. Asian	MAK_135	0.00728944	0.00176767	0.00899644	0.26103	0.0136509	0.707265			MAK_135	0.0718062	0.0301358	0.0134029	0.044974	0.839681		135	MAK_135	0.100376	0.0296753	0.0166226	0.853326		MAK_135	0.125003	0.0168931	0.858104		MAK_135	0.317818	0.682182
C.S. Asian	MAK_158	0.00145089	0.0141493	0.0108033	0.23327	0.0175886	0.722738			MAK_158	0.0657358	0.0453358	0.0168946	0.0515267	0.820507		158	MAK_158	0.0989187	0.044522	0.02115	0.83541		MAK_158	0.138531	0.0210511	0.840418		MAK_158	0.327045	0.672955
C.S. Asian	BRAH_13	0.0178222	1e-05	0.251142	0.210738	0.020231	0.500058			BRAH_13	0.071335	0.008756	0.256625	0.0441434	0.619141		13	BRAH_13	0.0989589	0.00824311	0.260854	0.631944		BRAH_13	0.10293	0.261407	0.635664		BRAH_13	0.234212	0.765788
C.S. Asian	BRAH_29	0.0322127	0.00791711	0.139358	0.222676	0.0202494	0.577587			BRAH_29	0.0850796	0.0337524	0.145468	0.0451231	0.690577		29	BRAH_29	0.11368	0.0333168	0.149506	0.703497		BRAH_29	0.142518	0.149643	0.707839		BRAH_29	0.296484	0.703516
C.S. Asian	BRAH_47	0.0143934	0.00427378	0.0555129	0.268976	0.0196526	0.637192			BRAH_47	0.071062	0.0305806	0.0602809	0.0492294	0.788847		47	BRAH_47	0.102338	0.0299102	0.0644674	0.803285		BRAH_47	0.12739	0.0647076	0.807902		BRAH_47	0.307639	0.692361
C.S. Asian	BRAH_19	0.0369002	0.0194053	0.0113	0.263103	0.0169874	0.652304			BRAH_19	0.0968774	0.0462107	0.0165451	0.0468973	0.793469		19	BRAH_19	0.126693	0.0456447	0.0203251	0.807337		BRAH_19	0.167068	0.0204209	0.812511		BRAH_19	0.351598	0.648402
C.S. Asian	BRAH_39	0.0375322	0.00581533	0.0369192	0.201629	0.0344236	0.68368			BRAH_39	0.0989759	0.0360503	0.0428399	0.068077	0.754056		39	BRAH_39	0.142845	0.0347656	0.0487381	0.773651		BRAH_39	0.172561	0.0491701	0.778269		BRAH_39	0.34911	0.65089
C.S. Asian	BRAH_43	0.0127158	0.00656444	0.037008	0.23183	0.021208	0.690674			BRAH_43	0.0739273	0.0349566	0.0431916	0.0537787	0.794146		43	BRAH_43	0.10824	0.0339257	0.0477514	0.810083		BRAH_43	0.137111	0.0479777	0.814911		BRAH_43	0.320549	0.679451
C.S. Asian	BRAH_41	0.0373208	1e-05	1e-05	0.2547	0.0101302	0.697829			BRAH_41	0.0998871	0.0271511	0.00699389	0.0406551	0.825313		41	BRAH_41	0.126081	0.0268938	0.00974478	0.83728		BRAH_41	0.147837	0.0101652	0.841998		BRAH_41	0.340319	0.659681
C.S. Asian	BRAH_9	0.0166491	1e-05	0.0106531	0.257356	0.0158341	0.699498			BRAH_9	0.0824166	0.0275678	0.016185	0.0454733	0.828357		9	BRAH_9	0.111909	0.0270088	0.0195417	0.84154		BRAH_9	0.133716	0.019873	0.846411		BRAH_9	0.324118	0.675882
C.S. Asian	BRAH_27	0.0148418	0.011359	0.0303831	0.218013	0.0139486	0.711454			BRAH_27	0.0791779	0.0422337	0.0376063	0.0464118	0.79457		27	BRAH_27	0.108264	0.0416626	0.0416209	0.808453		BRAH_27	0.144897	0.041697	0.813406		BRAH_27	0.327551	0.672449
C.S. Asian	BRAH_49	0.0110634	0.00265822	0.0147624	0.236126	0.0197199	0.71567			BRAH_49	0.0762557	0.0328122	0.0212902	0.0531404	0.816502		49	BRAH_49	0.110332	0.0319448	0.0255616	0.832162		BRAH_49	0.13701	0.0258949	0.837096		BRAH_49	0.326531	0.673469
C.S. Asian	BRAH_21	0.00250778	1e-05	0.0376546	0.219499	0.023479	0.71685			BRAH_21	0.0690043	0.0247381	0.0435432	0.0573286	0.805386		21	BRAH_21	0.105581	0.0236946	0.0483978	0.822327		BRAH_21	0.124308	0.0488346	0.826858		BRAH_21	0.309097	0.690903
C.S. Asian	BRAH_33	0.0176069	0.00557967	0.00198689	0.236871	0.0178536	0.720102			BRAH_33	0.0828122	0.0348477	0.00882478	0.0513189	0.822197		33	BRAH_33	0.115494	0.0342214	0.0126556	0.837629		BRAH_33	0.144522	0.0129114	0.842566		BRAH_33	0.335682	0.664318
C.S. Asian	BRAH_37	0.0239034	0.001793	0.00357422	0.238076	0.0115081	0.721145			BRAH_37	0.0901096	0.03121	0.0106954	0.0440882	0.823897		37	BRAH_37	0.118484	0.0307829	0.0137321	0.837001		BRAH_37	0.143952	0.0140653	0.841983		BRAH_37	0.334207	0.665793
C.S. Asian	BRAH_1	0.0212737	0.003332	0.0169047	0.224069	0.012871	0.721549			BRAH_1	0.0861047	0.0351468	0.0237072	0.0467201	0.808321		1	BRAH_1	0.115986	0.0345687	0.027835	0.82161		BRAH_1	0.145552	0.0281436	0.826305		BRAH_1	0.329733	0.670267
C.S. Asian	BRAH_31	0.0265659	0.004717	0.00932756	0.221885	0.0134512	0.724053			BRAH_31	0.0919827	0.0369759	0.0164369	0.0465162	0.808088		31	BRAH_31	0.12139	0.0365486	0.0199529	0.822108		BRAH_31	0.15276	0.0202201	0.82702		BRAH_31	0.340861	0.659139
C.S. Asian	BRAH_3	0.0195132	1e-05	0.0103398	0.223909	0.0212976	0.724931			BRAH_3	0.087651	0.0258077	0.0172223	0.0549358	0.814383		3	BRAH_3	0.122639	0.0247989	0.0217607	0.830802		BRAH_3	0.142205	0.0222708	0.835525		BRAH_3	0.329272	0.670728
C.S. Asian	BRAH_25	0.0128844	0.00763611	0.000719889	0.235814	0.0118262	0.731119			BRAH_25	0.0783312	0.0388319	0.00866956	0.046173	0.827995		25	BRAH_25	0.107892	0.0381198	0.0120221	0.841966		BRAH_25	0.140914	0.0121506	0.846936		BRAH_25	0.333523	0.666477
C.S. Asian	BRAH_5	0.0321737	0.00644022	0.00850256	0.211486	0.0101466	0.731251			BRAH_5	0.0993401	0.0363532	0.015384	0.0436809	0.805242		5	BRAH_5	0.127118	0.036049	0.0186841	0.818149		BRAH_5	0.157995	0.0189853	0.82302		BRAH_5	0.344223	0.655777
C.S. Asian	BRAH_7	0.0217949	1e-05	0.00897289	0.225798	0.00840067	0.735024			BRAH_7	0.0911962	0.0265203	0.015762	0.042373	0.824148		7	BRAH_7	0.118368	0.0260347	0.0186922	0.836906		BRAH_7	0.139279	0.019059	0.841662		BRAH_7	0.327505	0.672495
C.S. Asian	BRAH_17	0.00838378	0.00506367	0.00719389	0.221141	0.0193023	0.738915			BRAH_17	0.07447	0.0341574	0.0145497	0.0550477	0.821775		17	BRAH_17	0.110136	0.0332153	0.0186794	0.837969		BRAH_17	0.138308	0.0189166	0.842776		BRAH_17	0.330181	0.669819
C.S. Asian	BRAH_15	0.0181891	1e-05	0.00735044	0.229401	0.00183811	0.743212			BRAH_15	0.0920876	0.0195857	0.0131119	0.0365524	0.838662		15	BRAH_15	0.115647	0.0192637	0.0153738	0.849715		BRAH_15	0.129782	0.0159448	0.854273		BRAH_15	0.322195	0.677805
C.S. Asian	BRAH_45	0.0200198	1e-05	0.00220089	0.225853	0.00810556	0.74381			BRAH_45	0.0894928	0.028553	0.0104914	0.0422514	0.829212		45	BRAH_45	0.116362	0.0281533	0.0133438	0.842142		BRAH_45	0.139356	0.0137484	0.846896		BRAH_45	0.331501	0.668499
C.S. Asian	BRAH_23	0.012292	0.00287322	0.010293	0.22281	0.00783389	0.743899			BRAH_23	0.079697	0.0348366	0.0165133	0.0424882	0.826465		23	BRAH_23	0.106665	0.0343769	0.0196391	0.839319		BRAH_23	0.135961	0.0198874	0.844152		BRAH_23	0.328427	0.671573
C.S. Asian	BRAH_11	0.0300088	0.000631	1e-05	0.219528	0.00450478	0.745317			BRAH_11	0.0997387	0.0318832	0.00863244	0.038032	0.821713		11	BRAH_11	0.124111	0.0316581	0.011226	0.833005		BRAH_11	0.150558	0.0115498	0.837892		BRAH_11	0.340224	0.659776
C.S. Asian	BRAH_35	0.0255247	0.00557367	0.0183478	0.187692	0.0119498	0.750912			BRAH_35	0.0947736	0.0372639	0.0259911	0.0485318	0.79344		35	BRAH_35	0.125911	0.0366863	0.0300397	0.807362		BRAH_35	0.157492	0.0303048	0.812203		BRAH_35	0.339623	0.660377
								1								1							1					1
Mid. Eastern	DRU_576	1e-05	1e-05	0.0656079	0.678039	0.00234522	0.253988			DRU_576	0.0114596	1e-05	0.0655098	0.0118971	0.911124		576	DRU_576	0.0182813	3.76667e-05	0.065744	0.915937		DRU_576	0.0135944	0.0661241	0.920282		DRU_576	0.20676	0.79324
Mid. Eastern	DRU_563	1e-05	1e-05	0.0360026	0.700243	0.00206589	0.261668			DRU_563	0.0116193	1e-05	0.0362478	0.0116823	0.940441		563	DRU_563	0.0185872	1e-05	0.0363976	0.945005		DRU_563	0.0113066	0.0370743	0.951619		DRU_563	0.213409	0.786591
Mid. Eastern	DRU_568	1e-05	1e-05	0.0215903	0.705676	1e-05	0.272704			DRU_568	0.0110401	0.00468311	0.0233707	0.00220878	0.958697		568	DRU_568	0.011273	0.00569122	0.022622	0.960414		DRU_568	0.0119019	0.0228164	0.965282		DRU_568	0.219495	0.780505
Mid. Eastern	DRU_572	1e-05	1e-05	0.0322543	0.705915	1e-05	0.2618			DRU_572	0.00723378	1e-05	0.0331902	0.00969378	0.949872		572	DRU_572	0.0127957	1e-05	0.0331544	0.95404		DRU_572	0.006472	0.0335363	0.959991		DRU_572	0.210719	0.789281
Mid. Eastern	DRU_571	1e-05	1e-05	0.0167988	0.706716	1e-05	0.276456			DRU_571	1e-05	0.0110807	0.01799	0.00905967	0.96186		571	DRU_571	0.00262067	0.012795	0.0180712	0.966513		DRU_571	0.0103117	0.0180236	0.971665		DRU_571	0.219509	0.780491
Mid. Eastern	DRU_587	1e-05	0.001132	0.0267153	0.708	0.00268556	0.261457			DRU_587	0.00346056	0.0104271	0.0269097	0.0122299	0.946973		587	DRU_587	0.0100972	0.011144	0.0272238	0.951535		DRU_587	0.0165768	0.0272771	0.956146		DRU_587	0.223911	0.776089
Mid. Eastern	DRU_581	1e-05	1e-05	0.0192492	0.70852	0.00254233	0.269668			DRU_581	0.00839	0.00611367	0.0200857	0.0116826	0.953728		581	DRU_581	0.0145099	0.00692556	0.0202656	0.958299		DRU_581	0.0163019	0.0205138	0.963184		DRU_581	0.2254	0.7746
Mid. Eastern	DRU_582	0.00456378	1.7e-05	0.0360196	0.709227	1e-05	0.250162			DRU_582	0.0180346	0.00442322	0.0358172	0.00459467	0.93713		582	DRU_582	0.0199691	0.00527811	0.0351664	0.939586		DRU_582	0.0201074	0.0353909	0.944501		DRU_582	0.222911	0.777089
Mid. Eastern	DRU_601	1e-05	1e-05	0.028562	0.709496	1e-05	0.261912			DRU_601	1.1e-05	1e-05	0.0302824	0.0132591	0.956437		601	DRU_601	0.00735789	1e-05	0.0305969	0.962035		DRU_601	0.001128	0.0310206	0.967851		DRU_601	0.204782	0.795218
Mid. Eastern	DRU_584	1e-05	1e-05	0.0342847	0.710172	1e-05	0.255514			DRU_584	0.00701333	0.00708967	0.0344458	0.00708656	0.944365		584	DRU_584	0.0101877	0.00812222	0.0341062	0.947584		DRU_584	0.0135846	0.0342114	0.952204		DRU_584	0.218401	0.781599
Mid. Eastern	DRU_569	1e-05	1e-05	0.0387157	0.712196	1e-05	0.249058			DRU_569	0.00395822	1e-05	0.0394679	0.0101522	0.946412		569	DRU_569	0.00969278	6.54444e-05	0.0395216	0.95072		DRU_569	0.00445744	0.0397881	0.955754		DRU_569	0.208448	0.791552
Mid. Eastern	DRU_595	1e-05	1e-05	0.0168809	0.712246	0.00362278	0.26723			DRU_595	0.00184744	0.00885522	0.017723	0.014133	0.957441		595	DRU_595	0.00988033	0.00962633	0.01818	0.962313		DRU_595	0.0149389	0.0183323	0.966729		DRU_595	0.222292	0.777708
Mid. Eastern	DRU_580	1e-05	1e-05	0.0282723	0.712668	0.00783611	0.251204			DRU_580	0.0126127	0.001133	0.0280803	0.0157861	0.942388		580	DRU_580	0.0218452	0.00172489	0.0287339	0.947695		DRU_580	0.0186853	0.02911	0.952205		DRU_580	0.222121	0.777879
Mid. Eastern	DRU_566	0.00184744	1e-05	0.0371578	0.713381	0.00251056	0.245094			DRU_566	0.0134862	0.00405589	0.0364086	0.009264	0.936785		566	DRU_566	0.0181334	0.00489822	0.0362576	0.940711		DRU_566	0.0180149	0.0364786	0.945506		DRU_566	0.220026	0.779974
Mid. Eastern	DRU_586	1e-05	1e-05	0.034833	0.713735	1e-05	0.251402			DRU_586	0.01495	1e-05	0.0351417	0.00364667	0.946251		586	DRU_586	0.0170249	1e-05	0.0343644	0.948601		DRU_586	0.00907189	0.035068	0.95586		DRU_586	0.216706	0.783294
Mid. Eastern	DRU_578	0.00667678	4.76667e-05	0.0378708	0.714506	0.00412167	0.236778			DRU_578	0.0174576	0.00385878	0.0372679	0.010351	0.931065		578	DRU_578	0.0228067	0.00469444	0.0372476	0.935251		DRU_578	0.0225368	0.0374751	0.939988		DRU_578	0.222076	0.777924
Mid. Eastern	DRU_602	1.04444e-05	1e-05	0.0226052	0.715167	1e-05	0.262197			DRU_602	0.0114713	0.00437022	0.0231668	0.00499967	0.955992		602	DRU_602	0.0134573	0.00548456	0.022583	0.958475		DRU_602	0.0139228	0.0228614	0.963216		DRU_602	0.2185	0.7815
Mid. Eastern	DRU_599	1e-05	1e-05	0.018009	0.718673	1e-05	0.263288			DRU_599	0.00827589	0.00455889	0.0185106	0.00825033	0.960405		599	DRU_599	0.0119577	0.005519	0.0184309	0.964092		DRU_599	0.012576	0.0185464	0.968877		DRU_599	0.224129	0.775871
Mid. Eastern	DRU_577	1e-05	1e-05	0.0309627	0.719267	0.00413422	0.245616			DRU_577	0.0135354	0.000928778	0.0305047	0.0111538	0.943878		577	DRU_577	0.0194904	0.00175244	0.0305006	0.948256		DRU_577	0.0158797	0.0307814	0.953339		DRU_577	0.222162	0.777838
Mid. Eastern	DRU_559	1e-05	1e-05	0.0235594	0.719802	1e-05	0.256608			DRU_559	0.0139441	0.002736	0.0239051	0.00312278	0.956292		559	DRU_559	0.0147472	0.00380322	0.0233232	0.958126		DRU_559	0.0134607	0.0234876	0.963052		DRU_559	0.220727	0.779273
Mid. Eastern	DRU_564	1e-05	1e-05	0.0239027	0.7201	1e-05	0.255967			DRU_564	0.00427656	1e-05	0.0265331	0.004146	0.965034		564	DRU_564	0.00667878	3.57778e-05	0.0259512	0.967334		DRU_564	0.00170011	0.0262983	0.972002		DRU_564	0.20934	0.79066
Mid. Eastern	DRU_573	1e-05	1e-05	0.0323103	0.720146	1e-05	0.247514			DRU_573	0.00128044	0.00924767	0.0341252	0.00172256	0.953624		573	DRU_573	0.00127689	0.010366	0.0332967	0.95506		DRU_573	0.006722	0.0332397	0.960038		DRU_573	0.209359	0.790641
Mid. Eastern	DRU_560	1e-05	1e-05	0.0169729	0.72044	0.00420567	0.258361			DRU_560	0.00309556	0.00306844	0.0178653	0.0161027	0.959868		560	DRU_560	0.0121904	0.00368056	0.0183873	0.965742		DRU_560	0.0109109	0.0186362	0.970453		DRU_560	0.21947	0.78053
Mid. Eastern	DRU_558	1e-05	1.06667e-05	0.0216126	0.721596	1e-05	0.25676			DRU_558	0.00321178	0.00560856	0.0235178	0.00513211	0.962529		558	DRU_558	0.00525489	0.006723	0.02301	0.965012		DRU_558	0.00739144	0.0230824	0.969526		DRU_558	0.214764	0.785236
Mid. Eastern	DRU_561	1e-05	0.000761667	0.0343252	0.721857	1e-05	0.243036			DRU_561	0.000225	0.0103114	0.0353448	0.00559356	0.948525		561	DRU_561	0.00272789	0.0110809	0.0349491	0.951242		DRU_561	0.00903244	0.0349499	0.956018		DRU_561	0.217248	0.782752
Mid. Eastern	DRU_600	1e-05	1e-05	0.0169479	0.721985	0.000584778	0.260462			DRU_600	0.0125789	1e-05	0.0167361	0.00935133	0.961324		600	DRU_600	0.0180262	1e-05	0.0168077	0.965156		DRU_600	0.0126856	0.0172766	0.970038		DRU_600	0.219507	0.780493
Mid. Eastern	DRU_598	1e-05	1e-05	0.0380957	0.724009	1e-05	0.237866			DRU_598	0.00396811	0.00215333	0.0385347	0.00839689	0.946947		598	DRU_598	0.00794478	0.00310278	0.0383592	0.950593		DRU_598	0.00590156	0.0385648	0.955534		DRU_598	0.213841	0.786159
Mid. Eastern	DRU_588	1e-05	1e-05	0.0256133	0.724457	0.00148589	0.248424			DRU_588	1e-05	1e-05	0.0268233	0.0128563	0.9603		588	DRU_588	1e-05	0.00321667	0.0281934	0.96858		DRU_588	1e-05	0.0280181	0.971972		DRU_588	0.20423	0.79577
Mid. Eastern	DRU_597	1e-05	0.00367956	0.0245816	0.724735	0.00593044	0.241064			DRU_597	0.00213478	0.0114783	0.0247234	0.0142992	0.947364		597	DRU_597	0.00993944	0.0118954	0.0252759	0.952889		DRU_597	0.0174516	0.0251947	0.957354		DRU_597	0.218899	0.781101
Mid. Eastern	DRU_557	1e-05	1e-05	0.0213109	0.725259	1e-05	0.2534			DRU_557	0.002448	1e-05	0.0232807	0.01073	0.963531		557	DRU_557	0.00877411	1e-05	0.0232297	0.967986		DRU_557	0.00347989	0.0236388	0.972881		DRU_557	0.211813	0.788187
Mid. Eastern	DRU_591	1e-05	1e-05	0.0254802	0.725262	0.00313567	0.246101			DRU_591	0.000117222	0.008327	0.0258866	0.0119722	0.953697		591	DRU_591	0.00650356	0.00897478	0.026216	0.958306		DRU_591	0.010763	0.0263117	0.962925		DRU_591	0.219906	0.780094
Mid. Eastern	DRU_565	1e-05	1e-05	0.0342807	0.725732	1e-05	0.239958			DRU_565	0.00456511	1e-05	0.0359319	0.00575589	0.953737		565	DRU_565	0.00816167	1e-05	0.0353222	0.956506		DRU_565	0.00253089	0.035562	0.961907		DRU_565	0.206729	0.793271
Mid. Eastern	DRU_562	1e-05	1e-05	0.024995	0.726164	0.00562856	0.243192			DRU_562	0.00830922	1e-05	0.0251467	0.0143289	0.952205		562	DRU_562	0.0166771	1e-05	0.0256314	0.957681		DRU_562	0.0110166	0.0260259	0.962958		DRU_562	0.216626	0.783374
Mid. Eastern	DRU_606	1e-05	1e-05	0.0342436	0.728457	0.00470311	0.232576			DRU_606	0.00194733	0.002592	0.0346057	0.0140417	0.946813		606	DRU_606	0.00912522	0.00346478	0.0351251	0.952285		DRU_606	0.00770144	0.0352689	0.95703		DRU_606	0.210876	0.789124
Mid. Eastern	DRU_604	1.03333e-05	1e-05	0.0172248	0.729607	1e-05	0.253138			DRU_604	0.0115873	1e-05	0.0174628	0.00519889	0.965741		604	DRU_604	0.0144693	1e-05	0.0170587	0.968462		DRU_604	0.00742878	0.0178088	0.974763		DRU_604	0.216795	0.783205
Mid. Eastern	DRU_583	1e-05	1e-05	0.0200564	0.730498	1e-05	0.249415			DRU_583	0.00545322	0.00276267	0.0208894	0.00907311	0.961822		583	DRU_583	0.00977056	0.00378133	0.0208562	0.965592		DRU_583	0.00858856	0.0211436	0.970268		DRU_583	0.216108	0.783892
Mid. Eastern	DRU_574	1e-05	1e-05	0.0225171	0.731136	1e-05	0.246316			DRU_574	0.00103511	0.00138511	0.024525	0.00684567	0.966209		574	DRU_574	0.00422433	0.00220889	0.0242166	0.96935		DRU_574	0.00142011	0.0245446	0.974035		DRU_574	0.210439	0.789561
Mid. Eastern	DRU_579	1e-05	0.000398667	0.0273844	0.735475	0.00770878	0.229023			DRU_579	0.008497	0.00435211	0.0269169	0.0141631	0.946071		579	DRU_579	0.0162634	0.00505567	0.0272696	0.951411		DRU_579	0.0163678	0.0275431	0.95609		DRU_579	0.22123	0.77877
Mid. Eastern	DRU_594	1e-05	1e-05	0.0284708	0.736059	0.003333	0.232117			DRU_594	0.00580544	1e-05	0.0286187	0.0116332	0.953933		594	DRU_594	0.0126142	1e-05	0.0289129	0.958463		DRU_594	0.00609111	0.0294047	0.964504		DRU_594	0.212572	0.787428
Mid. Eastern	DRU_575	1e-05	1e-05	0.0201197	0.736419	0.00372122	0.23972			DRU_575	0.00590544	1e-05	0.0206429	0.0129219	0.96052		575	DRU_575	0.0132526	1e-05	0.0209582	0.965779		DRU_575	0.00753611	0.0214219	0.971042		DRU_575	0.213076	0.786924
Mid. Eastern	DRU_567	1e-05	1e-05	0.0291246	0.738034	0.00202944	0.230792			DRU_567	0.00214156	1e-05	0.0296131	0.0113796	0.956856		567	DRU_567	0.00867811	1e-05	0.0297944	0.961517		DRU_567	0.00254944	0.0301964	0.967254		DRU_567	0.20768	0.79232
Mid. Eastern	DRU_590	1e-05	1e-05	0.0125672	0.745609	1e-05	0.241794			DRU_590	0.00906089	1.06667e-05	0.0144012	1e-05	0.976517		590	DRU_590	0.00840178	0.000246556	0.0135889	0.977763		DRU_590	0.00338378	0.0138787	0.982737		DRU_590	0.214618	0.785382
Mid. Eastern	PAL_692	0.011073	1e-05	0.191284	0.618381	0.000605111	0.178648			PAL_692	0.0196282	1e-05	0.189979	0.005019	0.785364		692	PAL_692	0.0223614	1e-05	0.189521	0.788107		PAL_692	0.0175086	0.189663	0.792829		PAL_692	0.180596	0.819404
Mid. Eastern	PAL_744	0.002259	0.00207478	0.155172	0.667405	0.001188	0.171901			PAL_744	0.00802011	0.00377033	0.153565	0.00474956	0.829895		744	PAL_744	0.00988944	0.00462789	0.15294	0.832543		PAL_744	0.0102034	0.152908	0.836889		PAL_744	0.182282	0.817718
Mid. Eastern	PAL_680	1e-05	1e-05	0.114417	0.668894	0.00385733	0.212811			PAL_680	0.00890033	1e-05	0.113621	0.0105992	0.866869		680	PAL_680	0.0150612	1e-05	0.113704	0.871224		PAL_680	0.00884956	0.114119	0.877032		PAL_680	0.193427	0.806573
Mid. Eastern	PAL_739	1e-05	1e-05	0.109155	0.670797	1e-05	0.220018			PAL_739	0.010898	0.000155111	0.108644	0.00634411	0.873959		739	PAL_739	0.0139521	0.000621333	0.108236	0.877191		PAL_739	0.0102462	0.108408	0.881346		PAL_739	0.195578	0.804422
Mid. Eastern	PAL_723	0.00235322	1e-05	0.116447	0.673405	1e-05	0.207775			PAL_723	0.0128454	0.00206678	0.115366	0.00436422	0.865358		723	PAL_723	0.0146171	0.00306067	0.11469	0.867633		PAL_723	0.0126836	0.114883	0.872433		PAL_723	0.195218	0.804782
Mid. Eastern	PAL_683	0.00542833	1e-05	0.0886516	0.676259	0.00321578	0.226436			PAL_683	0.018757	1e-05	0.0876691	0.009621	0.883943		683	PAL_683	0.024706	1e-05	0.087671	0.887613		PAL_683	0.0174963	0.0883052	0.894198		PAL_683	0.20742	0.79258
Mid. Eastern	PAL_745	0.0140574	0.00211556	0.0776286	0.680425	0.00245478	0.223319			PAL_745	0.0238108	0.00618767	0.0763699	0.00858622	0.885046		745	PAL_745	0.0282973	0.00693833	0.0762093	0.888555		PAL_745	0.0303513	0.076451	0.893198		PAL_745	0.218522	0.781478
Mid. Eastern	PAL_726	1e-05	1e-05	0.085502	0.682488	0.00220822	0.229782			PAL_726	0.00955056	0.00357511	0.0846729	0.00898656	0.893215		726	PAL_726	0.014174	0.00420122	0.0845219	0.897103		PAL_726	0.0135549	0.0845928	0.901852		PAL_726	0.204002	0.795998
Mid. Eastern	PAL_686	0.0148424	1e-05	0.0978329	0.683087	1e-05	0.204218			PAL_686	0.026138	1e-05	0.0965468	0.00362656	0.873678		686	PAL_686	0.028207	1e-05	0.0958447	0.875938		PAL_686	0.0219643	0.0964049	0.88163		PAL_686	0.209007	0.790993
Mid. Eastern	PAL_741	0.00484944	1e-05	0.0897738	0.683163	0.00110733	0.221097			PAL_741	0.01722	1e-05	0.0888116	0.00770567	0.886253		741	PAL_741	0.021471	2.55556e-05	0.0885246	0.889979		PAL_741	0.0166762	0.088766	0.894558		PAL_741	0.205349	0.794651
Mid. Eastern	PAL_722	0.00637156	1e-05	0.0836574	0.683531	1e-05	0.226421			PAL_722	0.020162	1e-05	0.0826288	0.00596267	0.891237		722	PAL_722	0.0236232	1e-05	0.0821799	0.894187		PAL_722	0.0180909	0.0825804	0.899329		PAL_722	0.2096	0.7904
Mid. Eastern	PAL_734	1.64444e-05	1e-05	0.0782889	0.684759	0.004241	0.232685			PAL_734	0.0123371	0.00210456	0.0775674	0.0107043	0.897287		734	PAL_734	0.0181697	0.00271778	0.0775387	0.901574		PAL_734	0.0161711	0.0776913	0.906137		PAL_734	0.208804	0.791196
Mid. Eastern	PAL_724	1e-05	1e-05	0.0817789	0.685042	0.00739189	0.225767			PAL_724	0.00185256	1e-05	0.0820383	0.0177013	0.898398		724	PAL_724	0.0119861	1e-05	0.0829994	0.905004		PAL_724	0.00584344	0.0834361	0.910721		PAL_724	0.195855	0.804145
Mid. Eastern	PAL_688	1.02222e-05	1e-05	0.0730674	0.686593	0.0109992	0.22932			PAL_688	0.0122772	1e-05	0.0723804	0.0179624	0.89737		688	PAL_688	0.0229822	1e-05	0.0732818	0.903726		PAL_688	0.0177146	0.0735958	0.90869		PAL_688	0.212004	0.787996
Mid. Eastern	PAL_738	0.00996322	1e-05	0.154522	0.687965	0.0109259	0.136613			PAL_738	0.0121863	1e-05	0.152006	0.0127554	0.823043		738	PAL_738	0.0194206	1e-05	0.152459	0.828111		PAL_738	0.0140748	0.152827	0.833098		PAL_738	0.186069	0.813931
Mid. Eastern	PAL_676	0.00654567	1e-05	0.0704648	0.690222	0.00107133	0.231686			PAL_676	0.0208389	1e-05	0.0695223	0.00756767	0.902061		676	PAL_676	0.0252956	1e-05	0.069175	0.90552		PAL_676	0.0188794	0.0697066	0.911414		PAL_676	0.212546	0.787454
Mid. Eastern	PAL_678	1e-05	1e-05	0.077111	0.691717	1e-05	0.231142			PAL_678	0.00852578	1e-05	0.0775156	0.00493444	0.909014		678	PAL_678	0.0113192	1e-05	0.0769057	0.911765		PAL_678	0.00541911	0.0773181	0.917263		PAL_678	0.198013	0.801987
Mid. Eastern	PAL_699	1e-05	1e-05	0.0856689	0.693106	1.12222e-05	0.221194			PAL_699	0.00818889	1e-05	0.0851577	0.00728156	0.899362		699	PAL_699	0.0123139	1e-05	0.0848734	0.902803		PAL_699	0.00672522	0.0852096	0.908065		PAL_699	0.196611	0.803389
Mid. Eastern	PAL_679	1e-05	1e-05	0.0640517	0.694276	1e-05	0.241642			PAL_679	0.00426589	1e-05	0.0646978	0.00921011	0.921816		679	PAL_679	0.00935156	1e-05	0.0647393	0.925899		PAL_679	0.00423856	0.0650088	0.930753		PAL_679	0.201475	0.798525
Mid. Eastern	PAL_698	0.00468878	1e-05	0.0877863	0.694915	0.00194033	0.21066			PAL_698	0.0156853	1e-05	0.0864923	0.00750867	0.890304		698	PAL_698	0.0200987	1e-05	0.0862136	0.893678		PAL_698	0.0115032	0.0869954	0.901501		PAL_698	0.204983	0.795017
Mid. Eastern	PAL_691	1e-05	1e-05	0.0924648	0.695897	0.000450778	0.211167			PAL_691	0.0103168	1e-05	0.0913158	0.00626422	0.892093		691	PAL_691	0.0137479	5.8e-05	0.090935	0.895259		PAL_691	0.00914322	0.0911486	0.899708		PAL_691	0.197005	0.802995
Mid. Eastern	PAL_725	0.00326522	1e-05	0.0731131	0.697447	0.00403089	0.222133			PAL_725	0.0154642	0.000532444	0.0722073	0.00997933	0.901817		725	PAL_725	0.0207863	0.00128833	0.0721904	0.905735		PAL_725	0.0170327	0.0724483	0.910519		PAL_725	0.210419	0.789581
Mid. Eastern	PAL_693	0.00305556	1e-05	0.07151	0.697794	0.000530889	0.2271			PAL_693	0.0140586	0.00271311	0.0705582	0.006636	0.906034		693	PAL_693	0.0173488	0.00351478	0.0701436	0.908993		PAL_693	0.015913	0.0703253	0.913762		PAL_693	0.210885	0.789115
Mid. Eastern	PAL_736	0.00366422	1e-05	0.0740901	0.698298	1e-05	0.223927			PAL_736	0.018946	1e-05	0.073396	0.00208544	0.905562		736	PAL_736	0.0199663	1e-05	0.0724913	0.907532		PAL_736	0.0134101	0.0729999	0.91359		PAL_736	0.209075	0.790925
Mid. Eastern	PAL_696	1e-05	1e-05	0.0773554	0.698572	0.000329111	0.223724			PAL_696	0.00583789	0.000161	0.0772686	0.00858433	0.908148		696	PAL_696	0.0102836	0.000838222	0.0771292	0.911749		PAL_696	0.00636533	0.0773716	0.916263		PAL_696	0.197569	0.802431
Mid. Eastern	PAL_694	1e-05	1e-05	0.0742012	0.698576	0.00137311	0.225829			PAL_694	0.00983944	1e-05	0.0733491	0.00857111	0.90823		694	PAL_694	0.014845	1e-05	0.0731654	0.911979		PAL_694	0.00808956	0.0737052	0.918205		PAL_694	0.202281	0.797719
Mid. Eastern	PAL_682	0.001589	0.000758444	0.0765396	0.699095	0.00310411	0.218914			PAL_682	0.010852	0.00438511	0.0753422	0.00885956	0.900561		682	PAL_682	0.0153579	0.005177	0.0752377	0.904227		PAL_682	0.0155599	0.0754657	0.908975		PAL_682	0.208969	0.791031
Mid. Eastern	PAL_729	1e-05	0.001625	0.0910892	0.700337	0.00330433	0.203634			PAL_729	0.00647278	0.00528111	0.0897449	0.00876556	0.889736		729	PAL_729	0.0107912	0.00610033	0.0896353	0.893473		PAL_729	0.0121306	0.0896918	0.898178		PAL_729	0.205732	0.794268
Mid. Eastern	PAL_730	1e-05	1e-05	0.0678299	0.700526	0.002479	0.229145			PAL_730	0.00721556	0.00213011	0.0674483	0.0105119	0.912694		730	PAL_730	0.0132057	0.00276678	0.0675122	0.916515		PAL_730	0.0111789	0.0677598	0.921061		PAL_730	0.206825	0.793175
Mid. Eastern	PAL_731	0.00448111	1e-05	0.114211	0.700531	0.0114676	0.169299			PAL_731	0.010335	1e-05	0.112552	0.0145874	0.862515		731	PAL_731	0.0187974	1e-05	0.113132	0.868061		PAL_731	0.0120033	0.11368	0.874317		PAL_731	0.195912	0.804088
Mid. Eastern	PAL_685	0.00194944	1e-05	0.119109	0.703191	1e-05	0.17573			PAL_685	0.0105111	1e-05	0.117444	0.000465556	0.871569		685	PAL_685	0.0102841	0.000420667	0.116308	0.872987		PAL_685	0.006125	0.11637	0.877505		PAL_685	0.185048	0.814952
Mid. Eastern	PAL_700	0.00320767	0.00255567	0.101307	0.703372	0.000203444	0.189355			PAL_700	0.00889733	0.00491589	0.0999174	0.00468167	0.881588		700	PAL_700	0.0106242	0.005719	0.0993764	0.88428		PAL_700	0.0118219	0.0995162	0.888662		PAL_700	0.198662	0.801338
Mid. Eastern	PAL_684	0.005679	1e-05	0.0790701	0.703916	0.0123393	0.198986			PAL_684	0.0147863	1e-05	0.0777246	0.0174401	0.890039		684	PAL_684	0.0247636	1e-05	0.078637	0.896589		PAL_684	0.0176677	0.0792859	0.903047		PAL_684	0.206473	0.793527
Mid. Eastern	PAL_687	1e-05	1e-05	0.0619302	0.704032	1e-05	0.234008			PAL_687	0.00164089	1e-05	0.0626074	0.0102213	0.92552		687	PAL_687	0.00752656	2.63333e-05	0.0627191	0.929728		PAL_687	0.00255244	0.0628671	0.93458		PAL_687	0.198306	0.801694
Mid. Eastern	PAL_677	1.01111e-05	1e-05	0.0753496	0.705921	0.005909	0.212801			PAL_677	1e-05	1e-05	0.0752899	0.0154439	0.909246		677	PAL_677	0.00560778	0.00121589	0.0764472	0.916729		PAL_677	0.00192489	0.0766512	0.921424		PAL_677	0.197039	0.802961
Mid. Eastern	PAL_746	1e-05	1e-05	0.092849	0.707957	0.00113956	0.198035			PAL_746	0.00910656	1e-05	0.0913948	0.00599911	0.893489		746	PAL_746	0.0126792	1e-05	0.0909217	0.896389		PAL_746	0.00505789	0.0915029	0.903439		PAL_746	0.192285	0.807715
Mid. Eastern	PAL_690	1e-05	1e-05	0.0689532	0.709465	0.0128866	0.208675			PAL_690	0.00885667	0.000252889	0.0678533	0.01871	0.904327		690	PAL_690	0.0192027	0.000476889	0.0689458	0.911375		PAL_690	0.0148546	0.0691206	0.916025		PAL_690	0.207086	0.792914
Mid. Eastern	PAL_675	1e-05	1e-05	0.0730908	0.711283	0.00734878	0.208257			PAL_675	0.00498978	1e-05	0.0724851	0.0143828	0.908132		675	PAL_675	0.0131839	1e-05	0.0730546	0.913751		PAL_675	0.00799144	0.0733626	0.918646		PAL_675	0.201423	0.798577
Mid. Eastern	PAL_735	0.00427467	1e-05	0.0783562	0.713121	1e-05	0.204229			PAL_735	0.0168359	1e-05	0.0777093	1e-05	0.905435		735	PAL_735	0.0165556	1e-05	0.0765183	0.906916		PAL_735	0.00931878	0.0770663	0.913615		PAL_735	0.205032	0.794968
Mid. Eastern	PAL_740	0.00217267	1e-05	0.0716436	0.715056	1e-05	0.211108			PAL_740	0.0150436	1e-05	0.0709784	0.00146022	0.912508		740	PAL_740	0.0152579	0.000667556	0.0699894	0.914085		PAL_740	0.010943	0.0701979	0.918859		PAL_740	0.207626	0.792374
Mid. Eastern	PAL_727	1e-05	1e-05	0.0684914	0.716106	0.00614189	0.209241			PAL_727	0.00107878	1e-05	0.0685348	0.0140382	0.916338		727	PAL_727	0.00930944	1e-05	0.0689544	0.921726		PAL_727	0.00400856	0.0692812	0.92671		PAL_727	0.196101	0.803899
Mid. Eastern	PAL_733	1e-05	1e-05	0.0728953	0.716904	0.00494822	0.205232			PAL_733	0.00757456	0.00167889	0.0717421	0.0106928	0.908312		733	PAL_733	0.0133959	0.00233267	0.0718532	0.912418		PAL_733	0.0108	0.0720583	0.917142		PAL_733	0.207627	0.792373
Mid. Eastern	PAL_689	1e-05	1e-05	0.0762648	0.719156	1e-05	0.204549			PAL_689	0.00226511	1e-05	0.0758324	0.00721422	0.914678		689	PAL_689	0.00617022	1e-05	0.0755603	0.918259		PAL_689	0.001371	0.0757142	0.922915		PAL_689	0.192206	0.807794
Mid. Eastern	PAL_697	0.000872778	1e-05	0.0703932	0.720368	1e-05	0.208346			PAL_697	0.0128022	1e-05	0.069697	0.00152644	0.915964		697	PAL_697	0.0135568	1e-05	0.0688393	0.917594		PAL_697	0.00724222	0.0693813	0.923377		PAL_697	0.200273	0.799727
Mid. Eastern	PAL_732	1e-05	1e-05	0.0726348	0.726137	0.00542611	0.195782			PAL_732	1.1e-05	1e-05	0.0721009	0.012684	0.915194		732	PAL_732	1.26667e-05	1e-05	0.0740752	0.925902		PAL_732	1e-05	0.0731643	0.926826		PAL_732	0.189665	0.810335
Mid. Eastern	PAL_737	1e-05	1e-05	0.0766332	0.727984	0.00877389	0.186589			PAL_737	0.000683444	1e-05	0.0757779	0.0151468	0.908382		737	PAL_737	0.009413	1e-05	0.076317	0.91426		PAL_737	0.00350833	0.0766936	0.919798		PAL_737	0.196912	0.803088
Mid Eastern	BED_621	0.0158297	1e-05	0.782279	0.155575	0.00708822	0.0392188			BED_621	0.0175452	1e-05	0.782261	0.00823278	0.191951		621	BED_621	0.0219767	1e-05	0.78321	0.194803		BED_621	0.0183732	0.78307	0.198557		BED_621	0.0497634	0.950237
Mid Eastern	BED_613	0.00203822	0.000844667	0.0930722	0.649073	0.00408711	0.250884			BED_613	0.0157583	0.00611933	0.0924042	0.0116118	0.874106		613	BED_613	0.0218274	0.00691911	0.0926234	0.87863		BED_613	0.0238093	0.092755	0.883435		BED_613	0.211774	0.788226
Mid Eastern	BED_654	0.00528256	0.00256511	0.0698009	0.660984	0.00417167	0.257196			BED_654	0.0185321	0.00805744	0.069371	0.0123229	0.891717		654	BED_654	0.0251262	0.00888689	0.0696542	0.896332		BED_654	0.0290849	0.069754	0.901161		BED_654	0.220475	0.779525
Mid Eastern	BED_632	1.04444e-05	1e-05	0.150926	0.664741	1e-05	0.184303			BED_632	0.00541644	0.000525667	0.150377	0.002452	0.841229		632	BED_632	0.00610122	0.00143167	0.149463	0.843004		BED_632	0.00367456	0.149451	0.846875		BED_632	0.175736	0.824264
Mid Eastern	BED_611	0.00894089	1e-05	0.173882	0.666237	1e-05	0.15092			BED_611	0.0145586	1e-05	0.171887	0.000264889	0.81328		611	BED_611	0.0140772	0.000275222	0.170845	0.814803		BED_611	0.00978444	0.170894	0.819322		BED_611	0.1786	0.8214
Mid Eastern	BED_635	1e-05	0.00973711	0.123094	0.66836	0.00556122	0.193237			BED_635	0.000725333	0.0150102	0.122259	0.011766	0.85024		635	BED_635	0.00724889	0.015566	0.122554	0.854632		BED_635	0.0185761	0.122299	0.859125		BED_635	0.198497	0.801503
Mid Eastern	BED_645	1e-05	1e-05	0.123699	0.669214	0.000411333	0.206656			BED_645	0.00995578	0.000101667	0.12278	0.00610389	0.861059		645	BED_645	0.012832	0.000905111	0.12235	0.863913		BED_645	0.00884489	0.122482	0.868673		BED_645	0.1914	0.8086
Mid Eastern	BED_620	0.008988	1e-05	0.141567	0.670758	0.00171989	0.176957			BED_620	0.0164253	1e-05	0.140023	0.00547633	0.838065		620	BED_620	0.019412	1e-05	0.139517	0.841061		BED_620	0.0139863	0.139876	0.846138		BED_620	0.190466	0.809534
Mid Eastern	BED_634	0.00114989	1e-05	0.144935	0.670924	1e-05	0.182971			BED_634	0.0118758	1e-05	0.144042	1e-05	0.844062		634	BED_634	0.0113958	1e-05	0.142965	0.845629		BED_634	0.00601844	0.143243	0.850738		BED_634	0.183756	0.816244
Mid Eastern	BED_646	1e-05	1e-05	0.190492	0.673091	1e-05	0.136386			BED_646	1e-05	1e-05	0.188732	1e-05	0.811238		646	BED_646	1e-05	1e-05	0.187529	0.812451		BED_646	1e-05	0.186432	0.813558		BED_646	0.155685	0.844315
Mid Eastern	BED_640	0.00570922	1e-05	0.161235	0.675821	0.00593678	0.151288			BED_640	0.00954089	1e-05	0.159063	0.008573	0.822814		640	BED_640	0.014209	1e-05	0.159026	0.826755		BED_640	0.00879911	0.159303	0.831899		BED_640	0.180715	0.819285
Mid Eastern	BED_626	1e-05	8.93333e-05	0.0891538	0.683518	0.00518533	0.222044			BED_626	0.00612267	0.005129	0.0889018	0.0120164	0.88783		626	BED_626	0.0127782	0.00575278	0.0891474	0.892322		BED_626	0.0140942	0.0892487	0.896658		BED_626	0.202461	0.797539
Mid Eastern	BED_628	0.00642611	1e-05	0.0963261	0.684201	0.002405	0.210632			BED_628	0.0184977	1e-05	0.0950041	0.00756556	0.878923		628	BED_628	0.0229527	1e-05	0.0947657	0.882272		BED_628	0.0168116	0.0953356	0.887853		BED_628	0.202993	0.797007
Mid Eastern	BED_647	0.0126142	1e-05	0.0966427	0.687072	1e-05	0.203651			BED_647	0.023272	0.000805667	0.0955312	0.00366478	0.876727		647	BED_647	0.0244818	0.00179689	0.0947962	0.878925		BED_647	0.021448	0.095068	0.883484		BED_647	0.209639	0.790361
Mid Eastern	BED_629	1.07778e-05	1e-05	0.104794	0.687951	0.0205312	0.186704			BED_629	0.00714733	0.000975111	0.103345	0.0250796	0.863453		629	BED_629	0.0217632	0.00121333	0.105213	0.87181		BED_629	0.0179817	0.10553	0.876489		BED_629	0.203705	0.796295
Mid Eastern	BED_609	0.00515789	0.00281122	0.12102	0.690834	1e-05	0.180166			BED_609	0.012983	0.00507633	0.119884	1.22222e-05	0.862045		609	BED_609	0.0118058	0.00625111	0.118703	0.86324		BED_609	0.0133227	0.118754	0.867923		BED_609	0.194198	0.805802
Mid Eastern	BED_615	0.00874411	0.00314567	0.0826456	0.691663	1e-05	0.213791			BED_615	0.0181813	0.00673111	0.0816961	0.00446233	0.888929		615	BED_615	0.0198732	0.00780433	0.0809691	0.891353		BED_615	0.0229919	0.0810448	0.895963		BED_615	0.210491	0.789509
Mid Eastern	BED_644	1e-05	1e-05	0.0843842	0.693274	0.0107468	0.211575			BED_644	0.006772	0.00216944	0.0834992	0.0174018	0.890158		644	BED_644	0.0167157	0.00272789	0.0842841	0.896272		BED_644	0.0145594	0.084515	0.900926		BED_644	0.203264	0.796736
Mid Eastern	BED_614	0.000580667	1e-05	0.102137	0.695139	0.00287267	0.199261			BED_614	0.0102198	1e-05	0.100844	0.00773122	0.881195		614	BED_614	0.0144502	1e-05	0.100601	0.884938		BED_614	0.00893	0.100931	0.890139		BED_614	0.195219	0.804781
Mid Eastern	BED_625	1.02222e-05	1e-05	0.0895664	0.696487	0.00152489	0.212402			BED_625	0.0118547	1e-05	0.088088	0.007136	0.892912		625	BED_625	0.0158534	1e-05	0.087718	0.896419		BED_625	0.0107894	0.0880299	0.901181		BED_625	0.202221	0.797779
Mid Eastern	BED_619	1e-05	1e-05	0.0984541	0.697452	0.00174733	0.202326			BED_619	1.05556e-05	1e-05	0.098242	0.0100708	0.891667		619	BED_619	0.00287544	1e-05	0.0990114	0.898103		BED_619	1e-05	0.0986286	0.901361		BED_619	0.182847	0.817153
Mid Eastern	BED_637	0.00743667	1e-05	0.112084	0.698403	0.00273078	0.179336			BED_637	0.014679	1e-05	0.110442	0.00654867	0.86832		637	BED_637	0.0185114	1e-05	0.110091	0.871388		BED_637	0.0130592	0.110339	0.876602		BED_637	0.198647	0.801353
Mid Eastern	BED_638	1e-05	1e-05	0.155031	0.700572	0.000568556	0.143808			BED_638	0.00215189	1e-05	0.152713	0.00267633	0.842448		638	BED_638	0.00351611	1e-05	0.151882	0.844592		BED_638	1e-05	0.151614	0.848376		BED_638	0.173079	0.826921
Mid Eastern	BED_622	0.00181933	1e-05	0.105808	0.703407	0.000981222	0.187975			BED_622	0.010234	1e-05	0.104289	0.00528089	0.880186		622	BED_622	0.0133088	1e-05	0.10373	0.882952		BED_622	0.00845744	0.103971	0.887572		BED_622	0.192178	0.807822
Mid Eastern	BED_642	1.1e-05	1e-05	0.08845	0.721853	0.00403189	0.185644			BED_642	0.00678667	1e-05	0.0870422	0.00826022	0.897901		642	BED_642	0.0111749	1e-05	0.0868676	0.901947		BED_642	0.00635956	0.0870832	0.906557		BED_642	0.19396	0.80604
Mid Eastern	BED_627	1e-05	1e-05	0.151471	0.728553	0.00914189	0.110814			BED_627	1.11111e-05	1e-05	0.148265	0.00856878	0.843145		627	BED_627	0.00153656	1e-05	0.14894	0.849513		BED_627	1e-05	0.148275	0.851715		BED_627	0.172032	0.827968
Mid Eastern	BED_639	0.00397833	0.000718333	0.0935839	0.750635	0.00392533	0.147159			BED_639	0.006184	0.00151311	0.0915464	0.00545311	0.895303		639	BED_639	0.00839889	0.00245022	0.0910998	0.898051		BED_639	0.00608889	0.0911964	0.902715		BED_639	0.193971	0.806029
Mid Eastern	BED_607	0.00505722	1e-05	0.100081	0.784245	0.0103441	0.100262			BED_607	0.000103222	1e-05	0.0972621	0.00964833	0.892976		607	BED_607	0.00571056	1e-05	0.0972097	0.89707		BED_607	1e-05	0.097326	0.902664		BED_607	0.185741	0.814259
Mid Eastern	BED_608	0.00308556	1e-05	0.0885541	0.78514	0.00681133	0.1164			BED_608	0.000620667	1e-05	0.0855883	0.00693711	0.906844		608	BED_608	0.00436711	1e-05	0.0852762	0.910347		BED_608	1e-05	0.0852816	0.914708		BED_608	0.188918	0.811082
Mid Eastern	BED_641	1e-05	1e-05	0.084729	0.788192	0.000680444	0.126379			BED_641	1.03333e-05	1e-05	0.082683	0.000633	0.916664		641	BED_641	1e-05	1e-05	0.0815441	0.918436		BED_641	1e-05	0.080537	0.919453		BED_641	0.178078	0.821922
Mid Eastern	BED_624	1e-05	1e-05	0.101965	0.792127	0.00403044	0.101857			BED_624	1.05556e-05	1e-05	0.0982349	0.00165444	0.90009		624	BED_624	1.11111e-05	1e-05	0.0973717	0.902607		BED_624	1e-05	0.0963809	0.903609		BED_624	0.170166	0.829834
Mid Eastern	BED_636	1e-05	1e-05	0.0819339	0.793183	0.0113019	0.113561			BED_636	1.02222e-05	1e-05	0.0788984	0.0103707	0.910711		636	BED_636	0.000819889	1e-05	0.0801887	0.918981		BED_636	1e-05	0.0793632	0.920627		BED_636	0.186407	0.813593
Mid Eastern	BED_651	0.003501	0.000504667	0.089291	0.800967	0.00299056	0.102746			BED_651	0.00144344	9.93333e-05	0.0864677	0.00143722	0.910552		651	BED_651	0.00113367	0.00117711	0.0855114	0.912178		BED_651	1e-05	0.0850382	0.914952		BED_651	0.184564	0.815436
Mid Eastern	BED_653	0.00192233	1e-05	0.0768256	0.801113	0.00554633	0.114583			BED_653	1.12222e-05	1e-05	0.07402	0.00498311	0.920976		653	BED_653	0.00250844	1e-05	0.0734777	0.924004		BED_653	1e-05	0.073064	0.926926		BED_653	0.19104	0.80896
Mid Eastern	BED_648	0.0144788	1e-05	0.0820529	0.804207	0.000942	0.09831			BED_648	0.00930956	1e-05	0.0792957	0.000435667	0.910949		648	BED_648	0.009234	1e-05	0.0781464	0.912609		BED_648	0.00302378	0.0785857	0.918391		BED_648	0.19552	0.80448
Mid Eastern	BED_623	0.00138322	1e-05	0.0974601	0.807421	0.000763667	0.0929618			BED_623	1e-05	1e-05	0.0932646	1e-05	0.906705		623	BED_623	1e-05	1e-05	0.0920719	0.907908		BED_623	1e-05	0.0910552	0.908935		BED_623	0.177372	0.822628
Mid Eastern	BED_650	0.0178133	1e-05	0.0748537	0.816688	1e-05	0.090625			BED_650	0.0108846	1e-05	0.0717037	1e-05	0.917392		650	BED_650	0.0105271	1e-05	0.070757	0.918706		BED_650	0.00490622	0.0712068	0.923887		BED_650	0.193982	0.806018
Mid Eastern	BED_610	1e-05	1e-05	0.0776458	0.819982	0.00747344	0.0948792			BED_610	1.06667e-05	1e-05	0.0747539	0.0044	0.920826		610	BED_610	1e-05	1e-05	0.0746119	0.925368		BED_610	1e-05	0.073649	0.926341		BED_610	0.184593	0.815407
Mid Eastern	BED_701	0.00428967	1e-05	0.0736241	0.820752	0.00736244	0.0939621			BED_701	1.02222e-05	1e-05	0.070635	0.00598411	0.923361		701	BED_701	0.00291622	1e-05	0.0702862	0.926788		BED_701	1e-05	0.07003	0.92996		BED_701	0.189918	0.810082
Mid Eastern	BED_612	1e-05	1e-05	0.076055	0.821368	0.00568611	0.0968703			BED_612	1e-05	1e-05	0.0721654	0.00249978	0.925315		612	BED_612	1e-05	1e-05	0.0713994	0.928581		BED_612	1e-05	0.0703977	0.929592		BED_612	0.172887	0.827113
Mid Eastern	BED_643	0.000978	1e-05	0.0721401	0.830875	0.00608133	0.0899157			BED_643	1.05556e-05	1e-05	0.0687246	0.00236044	0.928894		643	BED_643	1e-05	1e-05	0.0681382	0.931842		BED_643	1e-05	0.0672116	0.932778		BED_643	0.185861	0.814139
Mid Eastern	BED_649	1.06667e-05	1e-05	0.0665133	0.832279	0.00699578	0.0941912			BED_649	1.11111e-05	1e-05	0.0636186	0.00350222	0.932858		649	BED_649	1e-05	1e-05	0.0633423	0.936638		BED_649	1e-05	0.0623948	0.937595		BED_649	0.188747	0.811253
Mid Eastern	BED_631	0.00330522	1e-05	0.0779326	0.835064	0.003699	0.079989			BED_631	1e-05	1e-05	0.0745064	1e-05	0.925464		631	BED_631	1.07778e-05	1e-05	0.0732027	0.926777		BED_631	1e-05	0.0722282	0.927762		BED_631	0.182406	0.817594
Mid Eastern	BED_630	0.0150973	1e-05	0.0826633	0.840085	1e-05	0.0621341			BED_630	0.00313122	1e-05	0.0792824	1e-05	0.917566		630	BED_630	0.00224922	1e-05	0.0783616	0.919379		BED_630	1e-05	0.0777977	0.922192		BED_630	0.188726	0.811274
Mid Eastern	BED_618	1e-05	1e-05	0.0731	0.840236	1e-05	0.0866341			BED_618	1e-05	1e-05	0.0681588	1e-05	0.931811		618	BED_618	1e-05	1e-05	0.0670174	0.932963		BED_618	1e-05	0.0661559	0.933834		BED_618	0.178381	0.821619
Mid Eastern	BED_616	0.009321	1e-05	0.0695851	0.843884	0.00720667	0.0699937			BED_616	0.000463222	1e-05	0.0666136	0.00516078	0.927753		616	BED_616	0.00328156	1e-05	0.0660396	0.930669		BED_616	1e-05	0.0656946	0.934295		BED_616	0.189287	0.810713
Mid. Eastern	MOZ_1270	0.0128707	0.00377867	0.727382	0.243516	1e-05	0.0124429			MOZ_1270	0.00991756	0.00204756	0.726342	1e-05	0.261682		1270	MOZ_1270	0.00837533	0.003206	0.726118	0.2623		MOZ_1270	0.00990444	0.725379	0.264717		MOZ_1270	0.0520484	0.947952
Mid. Eastern	MOZ_1271	1e-05	0.00389744	0.601037	0.384974	0.0100716	1e-05			MOZ_1271	1e-05	1e-05	0.598947	0.00551244	0.395521		1271	MOZ_1271	1e-05	0.000291889	0.599755	0.399944		MOZ_1271	1e-05	0.598989	0.401001		MOZ_1271	0.0670793	0.932921
Mid. Eastern	MOZ_1261	0.01386	0.00518411	0.376196	0.597545	0.00720444	1e-05			MOZ_1261	0.005453	0.000369667	0.373568	0.002738	0.617871		1261	MOZ_1261	0.00608989	0.00128911	0.373135	0.619486		MOZ_1261	0.00381267	0.372842	0.623346		MOZ_1261	0.123594	0.876406
Mid. Eastern	MOZ_1274	0.00671733	1e-05	0.297144	0.687368	0.008751	1e-05			MOZ_1274	1e-05	1e-05	0.294892	0.00213089	0.702957		1274	MOZ_1274	1e-05	1e-05	0.294451	0.705529		MOZ_1274	1e-05	0.293429	0.706561		MOZ_1274	0.131942	0.868058
Mid. Eastern	MOZ_1273	0.00753156	0.00438722	0.215675	0.709554	0.0102174	0.0526353			MOZ_1273	0.000389333	0.000861889	0.212673	0.007979	0.778097		1273	MOZ_1273	0.00433533	0.00166833	0.212626	0.781371		MOZ_1273	0.00167489	0.212608	0.785717		MOZ_1273	0.162268	0.837732
Mid. Eastern	MOZ_1259	0.0260302	1e-05	0.250958	0.722002	0.000990333	1e-05			MOZ_1259	0.00860533	1e-05	0.246342	1e-05	0.745033		1259	MOZ_1259	0.00804444	1e-05	0.245446	0.7465		MOZ_1259	0.000865222	0.245781	0.753354		MOZ_1259	0.151973	0.848027
Mid. Eastern	MOZ_1257	0.00322567	1e-05	0.269928	0.726816	1e-05	1e-05			MOZ_1257	1e-05	1e-05	0.266085	1e-05	0.733885		1257	MOZ_1257	1.05556e-05	1e-05	0.265146	0.734834		MOZ_1257	1e-05	0.264129	0.735861		MOZ_1257	0.129641	0.870359
Mid. Eastern	MOZ_1262	0.021834	1e-05	0.244248	0.728493	0.00540467	1e-05			MOZ_1262	0.00611689	1e-05	0.240824	0.000114444	0.752935		1262	MOZ_1262	0.00569533	1e-05	0.239919	0.754376		MOZ_1262	1e-05	0.240043	0.759947		MOZ_1262	0.152333	0.847667
Mid. Eastern	MOZ_1260	0.00335267	1e-05	0.256029	0.731227	0.00937133	1e-05			MOZ_1260	1e-05	1e-05	0.252491	0.000540222	0.746949		1260	MOZ_1260	1e-05	1e-05	0.25153	0.74845		MOZ_1260	1e-05	0.25043	0.74956		MOZ_1260	0.136757	0.863243
Mid. Eastern	MOZ_1276	0.004915	0.00124422	0.256695	0.735392	0.00174389	1e-05			MOZ_1276	1e-05	1e-05	0.252156	1e-05	0.747814		1276	MOZ_1276	1e-05	1e-05	0.251123	0.748857		MOZ_1276	1e-05	0.250251	0.749739		MOZ_1276	0.135634	0.864366
Mid. Eastern	MOZ_1256	0.0102476	1.03333e-05	0.248484	0.739543	1e-05	0.00170589			MOZ_1256	1e-05	1e-05	0.241626	1e-05	0.758344		1256	MOZ_1256	1.08889e-05	1e-05	0.240658	0.759321		MOZ_1256	1e-05	0.239633	0.760357		MOZ_1256	0.138094	0.861906
Mid. Eastern	MOZ_1277	0.0167417	1e-05	0.239378	0.743851	1e-05	1e-05			MOZ_1277	2.85556e-05	1e-05	0.235998	1e-05	0.763954		1277	MOZ_1277	1.04444e-05	1e-05	0.23496	0.76502		MOZ_1277	1e-05	0.233769	0.766221		MOZ_1277	0.147491	0.852509
Mid. Eastern	MOZ_1269	0.0100719	0.00359611	0.239936	0.745354	0.00103311	1e-05			MOZ_1269	1e-05	1e-05	0.23572	1e-05	0.76425		1269	MOZ_1269	1e-05	1e-05	0.234633	0.765347		MOZ_1269	1e-05	0.233793	0.766197		MOZ_1269	0.145102	0.854898
Mid. Eastern	MOZ_1266	0.014112	1e-05	0.230448	0.749582	0.00583811	1e-05			MOZ_1266	1e-05	1e-05	0.227357	1e-05	0.772613		1266	MOZ_1266	1.08889e-05	1e-05	0.22627	0.773709		MOZ_1266	1e-05	0.225152	0.774838		MOZ_1266	0.150547	0.849453
Mid. Eastern	MOZ_1268	0.00134333	1e-05	0.235777	0.750306	0.0125537	1e-05			MOZ_1268	1e-05	1e-05	0.232105	0.002056	0.765819		1268	MOZ_1268	1e-05	1e-05	0.231511	0.768469		MOZ_1268	1e-05	0.230369	0.769621		MOZ_1268	0.139721	0.860279
Mid. Eastern	MOZ_1267	0.0110513	1e-05	0.226702	0.752131	0.010095	1.04444e-05			MOZ_1267	1e-05	1e-05	0.224085	0.00371267	0.772183		1267	MOZ_1267	1.02222e-05	1e-05	0.223927	0.776053		MOZ_1267	1e-05	0.222714	0.777276		MOZ_1267	0.148752	0.851248
Mid. Eastern	MOZ_1279	0.0120427	1e-05	0.228578	0.754661	0.00469856	1e-05			MOZ_1279	1e-05	1e-05	0.226017	1e-05	0.773953		1279	MOZ_1279	1e-05	1e-05	0.224922	0.775058		MOZ_1279	1e-05	0.223826	0.776164		MOZ_1279	0.148989	0.851011
Mid. Eastern	MOZ_1254	0.0155649	1e-05	0.221274	0.758926	0.00421478	1e-05			MOZ_1254	0.000978889	1e-05	0.219319	1e-05	0.779682		1254	MOZ_1254	0.000390667	1e-05	0.218384	0.781215		MOZ_1254	1e-05	0.217169	0.782821		MOZ_1254	0.152186	0.847814
Mid. Eastern	MOZ_1253	0.00904178	1e-05	0.231104	0.758939	0.000894889	1e-05			MOZ_1253	1e-05	1e-05	0.227073	1e-05	0.772897		1253	MOZ_1253	1e-05	1e-05	0.226046	0.773934		MOZ_1253	1e-05	0.225076	0.774914		MOZ_1253	0.14363	0.85637
Mid. Eastern	MOZ_1278	0.0140636	1e-05	0.224354	0.75975	0.00181278	1e-05			MOZ_1278	1.05556e-05	1e-05	0.221831	1e-05	0.778139		1278	MOZ_1278	1e-05	1e-05	0.220773	0.779207		MOZ_1278	1e-05	0.219797	0.780193		MOZ_1278	0.151848	0.848152
Mid. Eastern	MOZ_1265	0.00321522	1e-05	0.228956	0.764167	0.00364222	1e-05			MOZ_1265	1e-05	1e-05	0.2255	1e-05	0.77447		1265	MOZ_1265	1e-05	1e-05	0.2244	0.77558		MOZ_1265	1e-05	0.223475	0.776515		MOZ_1265	0.142304	0.857696
Mid. Eastern	MOZ_1258	0.0171038	1e-05	0.216359	0.766508	1e-05	1e-05			MOZ_1258	0.000297	1e-05	0.213666	1e-05	0.786017		1258	MOZ_1258	1.02222e-05	1e-05	0.212681	0.787299		MOZ_1258	1e-05	0.211676	0.788314		MOZ_1258	0.152628	0.847372
Mid. Eastern	MOZ_1264	0.0131424	1e-05	0.219811	0.767017	1e-05	1e-05			MOZ_1264	1e-05	1e-05	0.214545	1e-05	0.785425		1264	MOZ_1264	1e-05	1e-05	0.21349	0.78649		MOZ_1264	1e-05	0.212571	0.787419		MOZ_1264	0.150845	0.849155
Mid. Eastern	MOZ_1275	0.0109046	1e-05	0.219925	0.767562	0.00158867	1e-05			MOZ_1275	1e-05	1e-05	0.216598	1e-05	0.783372		1275	MOZ_1275	1e-05	1e-05	0.215523	0.784457		MOZ_1275	1e-05	0.214545	0.785445		MOZ_1275	0.146071	0.853929
Mid. Eastern	MOZ_1255	0.0110327	0.00962378	0.206195	0.76762	0.003235	0.00229456			MOZ_1255	1.04444e-05	0.00243856	0.201873	1e-05	0.795668		1255	MOZ_1255	1e-05	0.00310022	0.200668	0.796222		MOZ_1255	1e-05	0.200385	0.799605		MOZ_1255	0.160954	0.839046
Mid. Eastern	MOZ_1280	1e-05	1e-05	0.228136	0.768297	0.00353756	1e-05			MOZ_1280	1e-05	1e-05	0.222857	1e-05	0.777113		1280	MOZ_1280	1.06667e-05	1e-05	0.221763	0.778217		MOZ_1280	1e-05	0.220844	0.779146		MOZ_1280	0.137691	0.862309
Mid. Eastern	MOZ_1272	0.0158072	1e-05	0.215631	0.768531	1e-05	1e-05			MOZ_1272	1.02222e-05	1e-05	0.213033	1e-05	0.786937		1272	MOZ_1272	1.01111e-05	1e-05	0.212005	0.787975		MOZ_1272	1e-05	0.210956	0.789034		MOZ_1272	0.152042	0.847958
Mid. Eastern	MOZ_1282	0.0121641	1e-05	0.211815	0.772202	0.00379956	1e-05			MOZ_1282	1e-05	1e-05	0.207559	1e-05	0.792411		1282	MOZ_1282	1e-05	1e-05	0.20649	0.79349		MOZ_1282	1e-05	0.205351	0.794639		MOZ_1282	0.14943	0.85057
Mid. Eastern	MOZ_1263	0.01913	0.000553222	0.187172	0.780336	0.00694211	0.00586678			MOZ_1263	0.00351989	1e-05	0.183078	0.00180667	0.811585		1263	MOZ_1263	0.00420089	1e-05	0.182327	0.813462		MOZ_1263	1e-05	0.182215	0.817775		MOZ_1263	0.164376	0.835624
								1								1							1					1
CEU	ADY_1384	0.0804421	0.0165988	1e-05	0.522001	0.000989778	0.379959			ADY_1384	0.108382	0.0288659	1e-05	0.0154017	0.847341		1384	ADY_1384	0.117602	0.0297844	1e-05	0.852604		ADY_1384	0.142476	1e-05	0.857514		ADY_1384	0.341311	0.658689
CEU	ADY_1404	0.0558231	0.0245638	1e-05	0.529904	1e-05	0.389689			ADY_1404	0.0839927	0.0378458	1e-05	0.0141924	0.863959		1404	ADY_1404	0.0921733	0.0388397	1e-05	0.868977		ADY_1404	0.125874	1e-05	0.874116		ADY_1404	0.323144	0.676856
CEU	ADY_1381	0.0436036	0.0201668	1e-05	0.533408	0.00573478	0.397076			ADY_1381	0.0726593	0.033171	1e-05	0.0209654	0.873194		1381	ADY_1381	0.0858018	0.0336293	1e-05	0.880559		ADY_1381	0.11428	1e-05	0.88571		ADY_1381	0.323026	0.676974
CEU	ADY_1397	0.0468812	0.0182987	1e-05	0.54017	0.00216722	0.392473			ADY_1397	0.0752107	0.0308	1e-05	0.0170097	0.87697		1397	ADY_1397	0.0856099	0.0314691	1e-05	0.882911		ADY_1397	0.112032	1e-05	0.887958		ADY_1397	0.320063	0.679937
CEU	ADY_1387	0.00938622	0.0127954	1e-05	0.5574	1e-05	0.420398			ADY_1387	0.0438966	0.0271113	1e-05	0.00796556	0.921017		1387	ADY_1387	0.0478181	0.0281024	1e-05	0.924069		ADY_1387	0.0707632	1e-05	0.929227		ADY_1387	0.28487	0.71513
CEU	ADY_1400	0.022562	0.00725833	1e-05	0.561217	1e-05	0.408943			ADY_1400	0.054405	0.0208482	1e-05	0.009756	0.914981		1400	ADY_1400	0.0593761	0.0220394	1e-05	0.918574		ADY_1400	0.0763858	1e-05	0.923604		ADY_1400	0.287083	0.712917
CEU	ADY_1382	1.01111e-05	0.0159916	1e-05	0.565217	1e-05	0.418762			ADY_1382	0.0300122	0.0326621	1e-05	0.00372578	0.93359		1382	ADY_1382	0.0312221	0.0336228	1e-05	0.935145		ADY_1382	0.0597411	1e-05	0.940249		ADY_1382	0.27368	0.72632
CEU	ADY_1398	0.0122182	0.00632878	1.06667e-05	0.566392	1e-05	0.415041			ADY_1398	0.0431473	0.0188551	1e-05	0.0129654	0.925022		1398	ADY_1398	0.0510138	0.0192744	1e-05	0.929702		ADY_1398	0.0652623	1e-05	0.934728		ADY_1398	0.277229	0.722771
CEU	ADY_1385	0.0420071	0.0123594	1e-05	0.566912	1e-05	0.378701			ADY_1385	0.0687641	0.0244167	1e-05	0.0105728	0.896237		1385	ADY_1385	0.0747597	0.0253509	1e-05	0.899879		ADY_1385	0.0950684	1e-05	0.904922		ADY_1385	0.300231	0.699769
CEU	ADY_1401	0.0255978	0.0112176	1e-05	0.567456	1e-05	0.395709			ADY_1401	0.0571311	0.0243708	1e-05	0.00604111	0.912447		1401	ADY_1401	0.0598249	0.0253482	1e-05	0.914817		ADY_1401	0.080219	1e-05	0.919771		ADY_1401	0.290321	0.709679
CEU	ADY_1396	0.04882	0.0262611	1e-05	0.568962	1e-05	0.355937			ADY_1396	0.0740371	0.037056	1e-05	0.011839	0.877058		1396	ADY_1396	0.0810567	0.0378181	1e-05	0.881115		ADY_1396	0.113601	1e-05	0.886389		ADY_1396	0.321903	0.678097
CEU	ADY_1386	0.0158733	0.0191539	1e-05	0.569144	1e-05	0.395809			ADY_1386	0.0450827	0.0320212	1e-05	0.0120138	0.910872		1386	ADY_1386	0.0517453	0.0329546	1e-05	0.91529		ADY_1386	0.0795736	1e-05	0.920416		ADY_1386	0.286907	0.713093
CEU	ADY_1388	0.0602557	0.0385633	1e-05	0.570864	1e-05	0.330297			ADY_1388	0.0873781	0.0492622	1e-05	0.00147367	0.861876		1388	ADY_1388	0.0871892	0.0503501	1e-05	0.862451		ADY_1388	0.132224	1e-05	0.867766		ADY_1388	0.342426	0.657574
CEU	ADY_1399	0.00878756	0.0173287	1e-05	0.572044	0.00163133	0.400198			ADY_1399	0.0352739	0.0297867	1e-05	0.016594	0.918335		1399	ADY_1399	0.0449623	0.0305561	1e-05	0.924472		ADY_1399	0.0707044	1e-05	0.929286		ADY_1399	0.279421	0.720579
CEU	ADY_1402	0.0190852	0.0150616	1e-05	0.572644	1e-05	0.39319			ADY_1402	0.053727	0.0278802	1e-05	0.00160944	0.916773		1402	ADY_1402	0.0535166	0.0288553	1e-05	0.917618		ADY_1402	0.0773	1e-05	0.92269		ADY_1402	0.295368	0.704632
CEU	ADY_1383	0.0155229	0.0114414	1e-05	0.578411	1e-05	0.394604			ADY_1383	0.0444767	0.0228403	1e-05	0.0120436	0.920629		1383	ADY_1383	0.05144	0.0235076	1e-05	0.925043		ADY_1383	0.0699017	1e-05	0.930088		ADY_1383	0.27941	0.72059
CEU	ADY_1403	0.00208589	0.0226828	1e-05	0.58929	1e-05	0.385922			ADY_1403	0.0284569	0.035778	1e-05	0.00740633	0.928349		1403	ADY_1403	0.0324518	0.0364678	1e-05	0.93107		ADY_1403	0.063747	1e-05	0.936243		ADY_1403	0.273756	0.726244
CEU	RUS_898	0.0624174	0.0654906	1e-05	0.603017	1e-05	0.269055			RUS_898	0.0784943	0.0721832	1e-05	0.00790478	0.841408		898	RUS_898	0.0828388	0.0731162	1e-05	0.844035		RUS_898	0.150496	1e-05	0.849494		RUS_898	0.362179	0.637821
CEU	RUS_895	0.0616211	0.0648404	1e-05	0.611123	1e-05	0.262396			RUS_895	0.07774	0.0711449	1e-05	0.00561222	0.845493		895	RUS_895	0.0800138	0.0725879	1e-05	0.847389		RUS_895	0.146677	1e-05	0.853313		RUS_895	0.35113	0.64887
CEU	RUS_893	0.0665201	0.0555968	1e-05	0.612974	1e-05	0.264889			RUS_893	0.0860184	0.0623533	1e-05	1e-05	0.851608		893	RUS_893	0.0843153	0.0640166	1e-05	0.851658		RUS_893	0.14285	1e-05	0.85714		RUS_893	0.350959	0.649041
CEU	RUS_894	0.0614247	0.0642262	1e-05	0.613834	1e-05	0.260495			RUS_894	0.0805867	0.0705941	1e-05	1e-05	0.848799		894	RUS_894	0.079061	0.0722679	1e-05	0.848662		RUS_894	0.145471	1e-05	0.854519		RUS_894	0.352867	0.647133
CEU	RUS_886	0.0504322	0.0551033	1e-05	0.613849	1e-05	0.280596			RUS_886	0.0679377	0.0622933	1e-05	0.00732044	0.862439		886	RUS_886	0.0719561	0.0630696	1e-05	0.864964		RUS_886	0.129402	1e-05	0.870588		RUS_886	0.33958	0.66042
CEU	RUS_896	0.0596668	0.0582697	1e-05	0.617001	1e-05	0.265042			RUS_896	0.0773248	0.0647871	1e-05	0.00378411	0.854094		896	RUS_896	0.0784748	0.0660796	1e-05	0.855436		RUS_896	0.138726	1e-05	0.861264		RUS_896	0.345389	0.654611
CEU	RUS_882	0.0678468	0.0566868	1e-05	0.624332	0.00318522	0.247939			RUS_882	0.0814653	0.0621111	1e-05	0.0100332	0.84638		882	RUS_882	0.0872573	0.0630277	1e-05	0.849705		RUS_882	0.14506	1e-05	0.85493		RUS_882	0.359451	0.640549
CEU	RUS_883	0.0582017	0.0600658	1e-05	0.627348	1e-05	0.254365			RUS_883	0.076308	0.0661886	1e-05	1e-05	0.857483		883	RUS_883	0.0749883	0.0673854	1e-05	0.857616		RUS_883	0.137006	1e-05	0.862984		RUS_883	0.348782	0.651218
CEU	RUS_881	0.0544523	0.0676531	1e-05	0.627793	1e-05	0.250082			RUS_881	0.0697703	0.0733738	1e-05	0.00411733	0.852729		881	RUS_881	0.0710504	0.0747907	1e-05	0.854149		RUS_881	0.140083	1e-05	0.859907		RUS_881	0.346707	0.653293
CEU	RUS_897	0.0460608	0.0696397	1e-05	0.631625	1e-05	0.252654			RUS_897	0.0614649	0.0756366	1e-05	0.00399811	0.85889		897	RUS_897	0.0629417	0.0768453	1e-05	0.860203		RUS_897	0.134034	1e-05	0.865956		RUS_897	0.345796	0.654204
CEU	RUS_880	0.0404777	0.0515131	1e-05	0.633505	0.00104278	0.273452			RUS_880	0.0561563	0.0581727	1e-05	0.00911856	0.876543		880	RUS_880	0.0611179	0.0591268	1e-05	0.879745		RUS_880	0.114674	1e-05	0.885316		RUS_880	0.329192	0.670808
CEU	RUS_885	0.0455776	0.0561699	1e-05	0.635462	1e-05	0.26277			RUS_885	0.0637957	0.0626726	1e-05	0.001435	0.872087		885	RUS_885	0.0635354	0.0638258	1e-05	0.872629		RUS_885	0.121522	1e-05	0.878468		RUS_885	0.340715	0.659285
CEU	RUS_901	0.069272	0.055301	1e-05	0.635926	1e-05	0.239481			RUS_901	0.0851606	0.0605564	1e-05	1e-05	0.854263		901	RUS_901	0.0836033	0.0620521	1e-05	0.854335		RUS_901	0.140182	1e-05	0.859808		RUS_901	0.354952	0.645048
CEU	RUS_902	0.0474351	0.053658	1.04444e-05	0.636225	1e-05	0.262661			RUS_902	0.0663907	0.0600617	1e-05	1e-05	0.873528		902	RUS_902	0.0644233	0.0618206	1e-05	0.873746		RUS_902	0.120799	1e-05	0.879191		RUS_902	0.332088	0.667912
CEU	RUS_891	0.0624034	0.0550486	1e-05	0.639852	1e-05	0.242676			RUS_891	0.0770129	0.0603366	1e-05	0.00301522	0.859625		891	RUS_891	0.077834	0.0615902	1e-05	0.860566		RUS_891	0.133957	1e-05	0.866033		RUS_891	0.343231	0.656769
CEU	RUS_890	0.0447083	0.0646099	1e-05	0.641032	1e-05	0.24963			RUS_890	0.0616728	0.0702303	1e-05	0.000526667	0.86756		890	RUS_890	0.060819	0.0714419	1e-05	0.867729		RUS_890	0.126835	1e-05	0.873155		RUS_890	0.338629	0.661371
CEU	RUS_879	0.0489226	0.0577744	1e-05	0.646273	0.00854956	0.23847			RUS_879	0.0611321	0.0622264	1e-05	0.0150079	0.861624		879	RUS_879	0.0702266	0.0628973	1e-05	0.866866		RUS_879	0.127055	1e-05	0.872935		RUS_879	0.340558	0.659442
CEU	RUS_884	0.0257554	0.0569524	1e-05	0.649321	1e-05	0.267951			RUS_884	0.0415929	0.0631574	1e-05	0.00603733	0.889202		884	RUS_884	0.0446117	0.0640707	1e-05	0.891308		RUS_884	0.102932	1e-05	0.897058		RUS_884	0.319929	0.680071
CEU	RUS_892	0.0539117	0.0559418	1e-05	0.651112	0.000917556	0.238107			RUS_892	0.0659842	0.060698	1e-05	0.00715367	0.866154		892	RUS_892	0.0696581	0.0616592	1e-05	0.868673		RUS_892	0.125863	1e-05	0.874127		RUS_892	0.339728	0.660272
CEU	RUS_888	0.0459307	0.0456804	1e-05	0.651958	1e-05	0.256411			RUS_888	0.0636149	0.0514036	1e-05	1e-05	0.884962		888	RUS_888	0.0621552	0.0528421	1e-05	0.884992		RUS_888	0.109656	1e-05	0.890334		RUS_888	0.325827	0.674173
CEU	RUS_887	0.045212	0.0587478	1e-05	0.652777	1e-05	0.243243			RUS_887	0.0611242	0.0641512	1e-05	1e-05	0.874705		887	RUS_887	0.0596689	0.0655276	1e-05	0.874794		RUS_887	0.12008	1e-05	0.87991		RUS_887	0.333311	0.666689
CEU	RUS_889	0.0518593	0.0582248	1e-05	0.653228	0.00330989	0.233368			RUS_889	0.0634724	0.0626841	1e-05	0.00900889	0.864825		889	RUS_889	0.068521	0.0636386	1e-05	0.86783		RUS_889	0.126236	1e-05	0.873754		RUS_889	0.334276	0.665724
CEU	RUS_903	0.0600434	0.0500922	1e-05	0.663894	1e-05	0.22595			RUS_903	0.0737239	0.0542077	1e-05	0.000468111	0.87159		903	RUS_903	0.0726731	0.055669	1e-05	0.871648		RUS_903	0.123037	1e-05	0.876953		RUS_903	0.338632	0.661368
CEU	RUS_899	0.0543662	0.0572669	1e-05	0.665007	0.00424944	0.2191			RUS_899	0.0650266	0.0613377	1e-05	0.00851311	0.865113		899	RUS_899	0.0697834	0.0622153	1e-05	0.867991		RUS_899	0.126388	1e-05	0.873602		RUS_899	0.336311	0.663689
CEU	RUS_900	0.0268267	0.0535092	1e-05	0.672715	0.00575956	0.241179			RUS_900	0.0385837	0.0583529	1e-05	0.0123167	0.890737		900	RUS_900	0.0459372	0.058914	1e-05	0.895139		RUS_900	0.0991774	1e-05	0.900813		RUS_900	0.316682	0.683318
CEU	ITA_1172	1e-05	0.0141602	1e-05	0.78747	1e-05	0.198339			ITA_1172	1.03333e-05	0.0196674	1e-05	0.00261744	0.977695		1172	ITA_1172	1e-05	0.0207731	1e-05	0.979207		ITA_1172	0.0159033	1e-05	0.984087		ITA_1172	0.234966	0.765034
CEU	ITA_1155	1e-05	0.0219411	1e-05	0.80194	1e-05	0.176088			ITA_1155	0.00229889	0.0245679	1e-05	1e-05	0.973113		1155	ITA_1155	0.000337	0.0260382	1e-05	0.973615		ITA_1155	0.0218894	1e-05	0.978101		ITA_1155	0.236715	0.763285
CEU	ITA_1147	1e-05	0.0145094	1e-05	0.810122	1e-05	0.175339			ITA_1147	1e-05	0.018053	1e-05	1e-05	0.981917		1147	ITA_1147	1.1e-05	0.0182917	1e-05	0.981687		ITA_1147	0.008154	1e-05	0.991836		ITA_1147	0.230344	0.769656
CEU	ITA_1171	1e-05	0.0194676	1e-05	0.815765	0.002613	0.162135			ITA_1171	1e-05	0.0203316	1e-05	0.00537078	0.974277		1171	ITA_1171	0.000684111	0.0219263	1e-05	0.97738		ITA_1171	0.0177704	1e-05	0.98222		ITA_1171	0.24155	0.75845
CEU	ITA_1153	1e-05	0.0167828	1e-05	0.820088	0.00201267	0.161096			ITA_1153	1e-05	0.0180928	1e-05	0.00403144	0.977856		1153	ITA_1153	1e-05	0.0196243	1e-05	0.980356		ITA_1153	0.0144042	1e-05	0.985586		ITA_1153	0.234735	0.765265
CEU	ITA_1157	1e-05	0.0196292	1e-05	0.820118	0.000798444	0.159434			ITA_1157	1e-05	0.0205966	1e-05	0.00357011	0.975813		1157	ITA_1157	1e-05	0.0220602	1e-05	0.97792		ITA_1157	0.0166957	1e-05	0.983294		ITA_1157	0.234928	0.765072
CEU	ITA_1152	1e-05	0.0151646	1e-05	0.821255	1e-05	0.16355			ITA_1152	1e-05	0.0163974	1e-05	1e-05	0.983573		1152	ITA_1152	1e-05	0.0166217	1e-05	0.983358		ITA_1152	0.00614678	1e-05	0.993843		ITA_1152	0.228122	0.771878
CEU	ITA_1174	1e-05	0.0164134	1e-05	0.82409	1e-05	0.159467			ITA_1174	1e-05	0.0182413	1e-05	1e-05	0.981729		1174	ITA_1174	1e-05	0.0184423	1e-05	0.981538		ITA_1174	0.00749733	1e-05	0.992493		ITA_1174	0.225813	0.774187
CEU	ITA_1156	1e-05	0.0146797	1e-05	0.825414	0.00617044	0.153716			ITA_1156	1e-05	0.0157781	1e-05	0.00840956	0.975792		1156	ITA_1156	0.00235367	0.017589	1e-05	0.980047		ITA_1156	0.0154623	1e-05	0.984528		ITA_1156	0.232892	0.767108
CEU	ITA_1151	0.00468644	0.0120426	1e-05	0.831978	1e-05	0.151272			ITA_1151	0.00639656	0.0120307	1e-05	1e-05	0.981553		1151	ITA_1151	0.00392767	0.0139192	1e-05	0.982143		ITA_1151	0.0134723	1e-05	0.986518		ITA_1151	0.235044	0.764956
CEU	ITA_1173	0.000583333	0.0183346	1e-05	0.837137	1e-05	0.143925			ITA_1173	0.00165067	0.017806	1e-05	1e-05	0.980523		1173	ITA_1173	9.93333e-05	0.0190207	1e-05	0.98087		ITA_1173	0.0143322	1e-05	0.985658		ITA_1173	0.235154	0.764846
CEU	ITA_1177	0.000319222	0.0197329	1e-05	0.84848	1e-05	0.131448			ITA_1177	1.06667e-05	0.018132	1e-05	0.000343667	0.981504		1177	ITA_1177	1.08889e-05	0.0183599	1e-05	0.981619		ITA_1177	0.0124419	1e-05	0.987548		ITA_1177	0.238292	0.761708
CEU	BAS_1371	0.00555189	0.0303069	1e-05	0.857705	0.000177889	0.106249			BAS_1371	0.00122256	0.0279493	1e-05	1e-05	0.970808		1371	BAS_1371	0.000166222	0.0288162	1e-05	0.971008		BAS_1371	0.0242718	1e-05	0.975718		BAS_1371	0.250355	0.749645
CEU	BAS_1372	0.00406433	0.0212984	1e-05	0.860744	1e-05	0.113873			BAS_1372	0.00104322	0.0197506	1e-05	1e-05	0.979186		1372	BAS_1372	1.02222e-05	0.021019	1e-05	0.978961		BAS_1372	0.0149553	1e-05	0.985035		BAS_1372	0.239148	0.760852
CEU	BAS_1366	1e-05	0.0234563	1e-05	0.862777	1e-05	0.113737			BAS_1366	1e-05	0.0195143	1e-05	1e-05	0.980456		1366	BAS_1366	1e-05	0.0198562	1e-05	0.980124		BAS_1366	0.0106384	1e-05	0.989352		BAS_1366	0.244486	0.755514
CEU	BAS_1379	1e-05	0.0238931	1e-05	0.864614	0.00266933	0.108803			BAS_1379	1e-05	0.0201637	1e-05	0.000913778	0.978903		1379	BAS_1379	1e-05	0.0206016	1e-05	0.979378		BAS_1379	0.0103232	1e-05	0.989667		BAS_1379	0.238588	0.761412
CEU	BAS_1364	1e-05	0.019594	1e-05	0.865029	0.00398678	0.11137			BAS_1364	1e-05	0.0165227	1e-05	0.00221956	0.981238		1364	BAS_1364	1e-05	0.0172722	1e-05	0.982708		BAS_1364	0.00679122	1e-05	0.993199		BAS_1364	0.231842	0.768158
CEU	BAS_1368	1e-05	0.0226144	1e-05	0.866078	0.000570444	0.110717			BAS_1368	1e-05	0.0185576	1e-05	1e-05	0.981412		1368	BAS_1368	1e-05	0.0189473	1e-05	0.981033		BAS_1368	0.0121442	1e-05	0.987846		BAS_1368	0.237902	0.762098
CEU	BAS_1365	1e-05	0.0136412	1e-05	0.867162	1e-05	0.119167			BAS_1365	1.04444e-05	0.0102034	1e-05	1e-05	0.989766		1365	BAS_1365	1.03333e-05	0.0106143	1e-05	0.989365		BAS_1365	1e-05	1e-05	0.99998		BAS_1365	0.227232	0.772768
CEU	BAS_1360	1e-05	0.0285321	1e-05	0.870339	0.000615556	0.100493			BAS_1360	1e-05	0.0234871	1e-05	1e-05	0.976483		1360	BAS_1360	1e-05	0.0238758	1e-05	0.976104		BAS_1360	0.0133954	1e-05	0.986595		BAS_1360	0.241735	0.758265
CEU	BAS_1373	1e-05	0.0235031	1e-05	0.872702	1e-05	0.103765			BAS_1373	1e-05	0.0178837	1e-05	1e-05	0.982086		1373	BAS_1373	1e-05	0.0181326	1e-05	0.981847		BAS_1373	0.00848744	1e-05	0.991503		BAS_1373	0.239852	0.760148
CEU	BAS_1361	0.000730667	0.0236139	1e-05	0.873129	0.00779711	0.0947198			BAS_1361	1e-05	0.0180342	1e-05	0.005231	0.976715		1361	BAS_1361	1.04444e-05	0.020005	1e-05	0.979974		BAS_1361	0.0139237	1e-05	0.986066		BAS_1361	0.238899	0.761101
CEU	BAS_1362	1e-05	0.0213492	1e-05	0.873488	0.000293111	0.104849			BAS_1362	1e-05	0.0171711	1e-05	1e-05	0.982799		1362	BAS_1362	1e-05	0.0174051	1e-05	0.982575		BAS_1362	0.00692944	1e-05	0.993061		BAS_1362	0.230093	0.769907
CEU	BAS_1375	1e-05	0.020055	1e-05	0.875407	0.00583589	0.0986816			BAS_1375	1e-05	0.0149193	1e-05	0.00379311	0.981267		1375	BAS_1375	1e-05	0.0163918	1e-05	0.983588		BAS_1375	0.00833556	1e-05	0.991654		BAS_1375	0.232986	0.767014
CEU	BAS_1367	1e-05	0.0384334	1e-05	0.876038	1e-05	0.0854983			BAS_1367	1e-05	0.0303974	1e-05	1e-05	0.969573		1367	BAS_1367	1e-05	0.0309522	1e-05	0.969028		BAS_1367	0.0172069	1e-05	0.982783		BAS_1367	0.237656	0.762344
CEU	BAS_1358	1e-05	0.0277373	1e-05	0.876795	1e-05	0.095438			BAS_1358	1e-05	0.0208177	1e-05	1e-05	0.979152		1358	BAS_1358	1.02222e-05	0.0212266	1e-05	0.978753		BAS_1358	0.00984289	1e-05	0.990147		BAS_1358	0.234704	0.765296
CEU	BAS_1363	1e-05	0.0269839	1.06667e-05	0.882016	1e-05	0.0909699			BAS_1363	1e-05	0.0201388	1e-05	1e-05	0.979831		1363	BAS_1363	1.01111e-05	0.0205673	1e-05	0.979413		BAS_1363	0.00953311	1e-05	0.990457		BAS_1363	0.233176	0.766824
CEU	BAS_1369	1e-05	0.0272831	1.07778e-05	0.882641	0.000692444	0.0893624			BAS_1369	1e-05	0.02014	1e-05	1e-05	0.97983		1369	BAS_1369	1.08889e-05	0.020368	1e-05	0.979611		BAS_1369	0.00786811	1e-05	0.992122		BAS_1369	0.233187	0.766813
CEU	BAS_1377	1e-05	0.0186724	1e-05	0.88629	1e-05	0.0950081			BAS_1377	1e-05	0.0112567	1e-05	1e-05	0.988713		1377	BAS_1377	1e-05	0.0113976	1e-05	0.988582		BAS_1377	1e-05	1e-05	0.99998		BAS_1377	0.225286	0.774714
CEU	BAS_1370	1e-05	0.0327177	1e-05	0.886738	0.000945889	0.079578			BAS_1370	1e-05	0.024465	1e-05	1e-05	0.975505		1370	BAS_1370	1e-05	0.0248723	1e-05	0.975108		BAS_1370	0.0150316	1e-05	0.984958		BAS_1370	0.244672	0.755328
CEU	BAS_1359	0.00133733	0.0171351	1e-05	0.887633	0.00721667	0.0866686			BAS_1359	1e-05	0.0114313	1e-05	0.005594	0.982955		1359	BAS_1359	1e-05	0.0135213	1e-05	0.986459		BAS_1359	0.00758578	1e-05	0.992404		BAS_1359	0.227215	0.772785
CEU	BAS_1374	0.00368056	0.0278429	1e-05	0.889753	9.18889e-05	0.0786216			BAS_1374	1e-05	0.0215536	1e-05	1e-05	0.978416		1374	BAS_1374	1e-05	0.022154	1e-05	0.977826		BAS_1374	0.0145339	1e-05	0.985456		BAS_1374	0.240739	0.759261
CEU	BAS_1380	1e-05	0.0175402	1e-05	0.891344	0.00775478	0.0833414			BAS_1380	1e-05	0.0118942	1e-05	0.00336956	0.984716		1380	BAS_1380	1e-05	0.0132012	1e-05	0.986779		BAS_1380	0.00489833	1e-05	0.995092		BAS_1380	0.227946	0.772054
CEU	BAS_1357	1e-05	0.0225322	1e-05	0.894318	9.25556e-05	0.0830372			BAS_1357	1e-05	0.013964	1e-05	1e-05	0.986006		1357	BAS_1357	1.01111e-05	0.0145902	1e-05	0.98539		BAS_1357	0.000927889	1e-05	0.999062		BAS_1357	0.221447	0.778553
CEU	BAS_1376	1e-05	0.0219174	1e-05	0.894341	1e-05	0.0837119			BAS_1376	1e-05	0.0137693	1e-05	1e-05	0.986201		1376	BAS_1376	1e-05	0.0140739	1e-05	0.985906		BAS_1376	1e-05	1e-05	0.99998		BAS_1376	0.22404	0.77596
CEU	BAS_1378	1e-05	0.0211458	1e-05	0.895625	1e-05	0.0831993			BAS_1378	1e-05	0.0128958	1e-05	1e-05	0.987074		1378	BAS_1378	1.11111e-05	0.0132362	1e-05	0.986743		BAS_1378	1e-05	1e-05	0.99998		BAS_1378	0.223545	0.776455
CEU	FRE_533	1e-05	0.029209	1.06667e-05	0.738059	1e-05	0.232702			FRE_533	1e-05	0.0396961	1e-05	1e-05	0.960274		533	FRE_533	1e-05	0.0399886	1e-05	0.959991		FRE_533	0.0322452	1e-05	0.967745		FRE_533	0.26446	0.73554
CEU	FRE_519	1e-05	0.0356932	1e-05	0.749286	1e-05	0.21499			FRE_519	1e-05	0.0426624	1e-05	0.004041	0.953277		519	FRE_519	1e-05	0.0441561	1e-05	0.955824		FRE_519	0.0347988	1e-05	0.965191		FRE_519	0.257919	0.742081
CEU	FRE_535	1e-05	0.033192	1e-05	0.761792	1e-05	0.204986			FRE_535	1e-05	0.0403934	1e-05	0.000438667	0.959148		535	FRE_535	1e-05	0.0406377	1e-05	0.959342		FRE_535	0.0315134	1e-05	0.968477		FRE_535	0.26054	0.73946
CEU	FRE_528	1e-05	0.030605	1e-05	0.762005	0.00554389	0.201826			FRE_528	0.00181111	0.0347003	1e-05	0.0109921	0.952486		528	FRE_528	0.00761378	0.0356287	1e-05	0.956748		FRE_528	0.0377889	1e-05	0.962201		FRE_528	0.257053	0.742947
CEU	FRE_513	1e-05	0.0304749	1e-05	0.764224	0.00103311	0.204248			FRE_513	0.00432433	0.0338732	1e-05	0.00605378	0.955739		513	FRE_513	0.00687833	0.0347809	1e-05	0.958331		FRE_513	0.036213	1e-05	0.963777		FRE_513	0.257297	0.742703
CEU	FRE_516	1e-05	0.0256702	1e-05	0.768624	1e-05	0.205676			FRE_516	0.00378122	0.0304743	1e-05	0.00111322	0.964621		516	FRE_516	0.00287111	0.0315636	1e-05	0.965555		FRE_516	0.0286431	1e-05	0.971347		FRE_516	0.250549	0.749451
CEU	FRE_514	1e-05	0.0324772	1e-05	0.770429	0.000511444	0.196563			FRE_514	0.00313233	0.0351428	1e-05	0.00571911	0.955996		514	FRE_514	0.00516878	0.0362671	1e-05	0.958554		FRE_514	0.0370139	1e-05	0.962976		FRE_514	0.254873	0.745127
CEU	FRE_525	1e-05	0.0397608	1e-05	0.772005	0.000470889	0.187743			FRE_525	0.00120522	0.0428147	1e-05	0.00508722	0.950883		525	FRE_525	0.00290267	0.0437836	1e-05	0.953303		FRE_525	0.0414379	1e-05	0.958552		FRE_525	0.261715	0.738285
CEU	FRE_527	1e-05	0.0335528	1e-05	0.77233	0.00171589	0.192381			FRE_527	1e-05	0.0375446	1e-05	0.00657944	0.955856		527	FRE_527	1e-05	0.0398721	1e-05	0.960108		FRE_527	0.0329562	1e-05	0.967034		FRE_527	0.256316	0.743684
CEU	FRE_511	1e-05	0.0316456	1e-05	0.773743	0.000265333	0.194327			FRE_511	1e-05	0.0359441	1e-05	0.00515456	0.958881		511	FRE_511	1e-05	0.0377358	1e-05	0.962244		FRE_511	0.0269182	1e-05	0.973072		FRE_511	0.25173	0.74827
CEU	FRE_526	1e-05	0.0319761	1e-05	0.774692	1e-05	0.193302			FRE_526	0.00294778	0.0360418	1e-05	0.000107222	0.960893		526	FRE_526	0.001424	0.0372386	1e-05	0.961327		FRE_526	0.0335843	1e-05	0.966406		FRE_526	0.259443	0.740557
CEU	FRE_515	1e-05	0.0292921	1e-05	0.781702	1e-05	0.188975			FRE_515	1.01111e-05	0.0345038	1e-05	1e-05	0.965466		515	FRE_515	1.04444e-05	0.0348914	1e-05	0.965088		FRE_515	0.0283559	1e-05	0.971634		FRE_515	0.25432	0.74568
CEU	FRE_512	1e-05	0.0317969	1e-05	0.782825	0.000915556	0.184442			FRE_512	1e-05	0.0345526	1e-05	0.00541044	0.960017		512	FRE_512	1.03333e-05	0.0367042	1e-05	0.963275		FRE_512	0.030518	1e-05	0.969472		FRE_512	0.253868	0.746132
CEU	FRE_534	1.03333e-05	0.0300964	1e-05	0.784493	1e-05	0.18538			FRE_534	0.00461211	0.0327788	1e-05	1e-05	0.962589		534	FRE_534	0.00301389	0.0339786	1e-05	0.962997		FRE_534	0.030759	1e-05	0.969231		FRE_534	0.256265	0.743735
CEU	FRE_517	0.00192856	0.0268862	1e-05	0.784691	1e-05	0.186474			FRE_517	0.00880311	0.028193	1e-05	1e-05	0.962984		517	FRE_517	0.00651667	0.0300104	1e-05	0.963463		FRE_517	0.0312199	1e-05	0.96877		FRE_517	0.252642	0.747358
CEU	FRE_529	1e-05	0.0234427	1e-05	0.788594	1e-05	0.187934			FRE_529	0.00321778	0.026596	1e-05	1e-05	0.970167		529	FRE_529	0.00161089	0.0279512	1e-05	0.970428		FRE_529	0.0249458	1e-05	0.975044		FRE_529	0.248339	0.751661
CEU	FRE_520	0.00561078	0.020487	0.00302067	0.78922	1e-05	0.181651			FRE_520	0.0120957	0.0215132	0.00376178	1e-05	0.962619		520	FRE_520	0.0105929	0.0230466	0.00314978	0.963211		FRE_520	0.0283808	0.00297233	0.968647		FRE_520	0.24388	0.75612
CEU	FRE_518	1e-05	0.0243649	1.02222e-05	0.791368	0.00259789	0.181649			FRE_518	1e-05	0.0270764	1e-05	0.00666567	0.966237		518	FRE_518	0.00161211	0.0286283	1e-05	0.96975		FRE_518	0.0248398	1e-05	0.97515		FRE_518	0.246862	0.753138
CEU	FRE_522	1e-05	0.0241751	1e-05	0.791377	1e-05	0.184417			FRE_522	0.00211989	0.0278717	1e-05	1e-05	0.969988		522	FRE_522	0.000499556	0.0290453	1e-05	0.970445		FRE_522	0.0253451	1e-05	0.974645		FRE_522	0.25244	0.74756
CEU	FRE_537	1e-05	0.0303223	1e-05	0.794405	1e-05	0.175243			FRE_537	1e-05	0.0328949	1e-05	0.00336044	0.963725		537	FRE_537	1e-05	0.0342878	1e-05	0.965692		FRE_537	0.0280258	1e-05	0.971964		FRE_537	0.252374	0.747626
CEU	FRE_521	1e-05	0.0221241	1e-05	0.795323	0.000634111	0.181898			FRE_521	0.00285933	0.0241424	1e-05	0.00396256	0.969026		521	FRE_521	0.00382511	0.0252004	1e-05	0.970964		FRE_521	0.0238648	1e-05	0.976125		FRE_521	0.244643	0.755357
CEU	FRE_523	1e-05	0.0364828	1e-05	0.796464	1e-05	0.167023			FRE_523	1e-05	0.0390011	1e-05	1e-05	0.960969		523	FRE_523	1.01111e-05	0.0392952	1e-05	0.960685		FRE_523	0.0315379	1e-05	0.968452		FRE_523	0.259366	0.740634
CEU	FRE_538	1e-05	0.0257436	1e-05	0.799791	1e-05	0.174435			FRE_538	2.67778e-05	0.0292463	1e-05	1e-05	0.970707		538	FRE_538	1.08889e-05	0.0297043	1e-05	0.970275		FRE_538	0.0236564	1e-05	0.976334		FRE_538	0.242584	0.757416
CEU	FRE_530	1e-05	0.0185136	1e-05	0.801139	0.000360222	0.179967			FRE_530	1e-05	0.0216972	1e-05	0.00391956	0.974363		530	FRE_530	1e-05	0.0231873	1e-05	0.976793		FRE_530	0.01663	1e-05	0.98336		FRE_530	0.241144	0.758856
CEU	FRE_524	1e-05	0.0282517	1e-05	0.801211	1e-05	0.170508			FRE_524	1e-05	0.0304844	1e-05	0.00219533	0.9673		524	FRE_524	1e-05	0.0314153	1e-05	0.968565		FRE_524	0.02541	1e-05	0.97458		FRE_524	0.246798	0.753202
CEU	FRE_536	0.00306844	0.0152921	1e-05	0.80823	0.00516489	0.168235			FRE_536	0.00724944	0.0156313	1e-05	0.00722578	0.969883		536	FRE_536	0.0107453	0.0164639	1e-05	0.972781		FRE_536	0.0222643	1e-05	0.977726		FRE_536	0.241801	0.758199
CEU	FRE_539	1e-05	0.0236576	1e-05	0.808287	1e-05	0.168025			FRE_539	1e-05	0.0258794	1e-05	0.00187767	0.972223		539	FRE_539	1e-05	0.0267244	1e-05	0.973256		FRE_539	0.018319	1e-05	0.981671		FRE_539	0.23754	0.76246
CEU	FRE_531	0.00364878	0.0192457	1e-05	0.857421	1e-05	0.119664			FRE_531	0.00250633	0.0168079	1e-05	1e-05	0.980666		531	FRE_531	0.000829667	0.0181563	1e-05	0.981004		FRE_531	0.0145804	1e-05	0.98541		FRE_531	0.233721	0.766279
CEU	TUSC_1163	1e-05	0.0131773	1.02222e-05	0.774676	1e-05	0.212117			TUSC_1163	0.00250044	0.0200544	1.03333e-05	1e-05	0.977425		1163	TUSC_1163	0.000551889	0.0213674	1e-05	0.97807		TUSC_1163	0.0166018	1e-05	0.983388		TUSC_1163	0.236563	0.763437
CEU	TUSC_1162	1e-05	0.00772	0.00137344	0.774875	0.00198556	0.214036			TUSC_1162	1e-05	0.0137896	0.002631	0.00772989	0.97584		1162	TUSC_1162	0.003042	0.015235	0.00251544	0.979207		TUSC_1162	0.0136107	0.00243733	0.983952		TUSC_1162	0.229881	0.770119
CEU	TUSC_1167	0.009008	0.0189877	0.00213733	0.78433	1e-05	0.185527			TUSC_1167	0.0150394	0.0204312	0.00334733	0.000117333	0.961064		1167	TUSC_1167	0.0137036	0.0217032	0.00258633	0.962007		TUSC_1167	0.0301817	0.00236767	0.96745		TUSC_1167	0.247507	0.752493
CEU	TUSC_1169	1.04444e-05	0.0120461	1e-05	0.79573	1e-05	0.192193			TUSC_1169	0.00497411	0.0145356	1e-05	1e-05	0.98047		1169	TUSC_1169	0.00373133	0.0154909	1e-05	0.980768		TUSC_1169	0.014089	1e-05	0.985901		TUSC_1169	0.236234	0.763766
CEU	TUSC_1168	0.000718111	0.0245144	1e-05	0.804068	1e-05	0.17068			TUSC_1168	0.00634478	0.0244687	0.00013	0.000332222	0.968724		1168	TUSC_1168	0.00489411	0.0257511	1e-05	0.969345		TUSC_1168	0.0262052	1e-05	0.973785		TUSC_1168	0.240236	0.759764
CEU	TUSC_1166	1e-05	0.016499	1e-05	0.810314	0.000516333	0.172651			TUSC_1166	0.000814333	0.0180903	1e-05	0.004002	0.977083		1166	TUSC_1166	0.00172611	0.0192077	1e-05	0.979056		TUSC_1166	0.0168083	1e-05	0.983182		TUSC_1166	0.231461	0.768539
CEU	TUSC_1164	1e-05	0.00968067	1e-05	0.824846	0.00530656	0.160147			TUSC_1164	6.66667e-05	0.0111606	1e-05	0.00750278	0.98126		1164	TUSC_1164	0.00294111	0.0122387	1e-05	0.98481		TUSC_1164	0.0104778	1e-05	0.989512		TUSC_1164	0.225916	0.774084
CEU	TUSC_1161	0.000840333	0.0109804	1e-05	0.827466	0.00486744	0.155835			TUSC_1161	0.00286078	0.0109253	1e-05	0.00617144	0.980033		1161	TUSC_1161	0.00570867	0.0117838	1e-05	0.982497		TUSC_1161	0.0126634	1e-05	0.987327		TUSC_1161	0.232419	0.767581
CEU	ORC_798	1e-05	0.0330239	1e-05	0.730016	1e-05	0.23693			ORC_798	1e-05	0.0436631	1e-05	0.000732	0.955585		798	ORC_798	1e-05	0.0440999	1e-05	0.95588		ORC_798	0.0337472	1e-05	0.966243		ORC_798	0.25699	0.74301
CEU	ORC_802	1e-05	0.04093	1e-05	0.734376	1e-05	0.224664			ORC_802	1e-05	0.0493903	1e-05	0.00355122	0.947039		802	ORC_802	1.05556e-05	0.0506887	1e-05	0.949291		ORC_802	0.0423073	1e-05	0.957683		ORC_802	0.267179	0.732821
CEU	ORC_795	1e-05	0.0277834	1e-05	0.734687	1e-05	0.2375			ORC_795	0.00215333	0.0376641	1e-05	1e-05	0.960163		795	ORC_795	0.000289333	0.0391756	1e-05	0.960525		ORC_795	0.034277	1e-05	0.965713		ORC_795	0.261444	0.738556
CEU	ORC_796	1e-05	0.0396439	1e-05	0.738726	1e-05	0.2216			ORC_796	1e-05	0.0478216	1e-05	0.00234311	0.949815		796	ORC_796	1e-05	0.0487557	1e-05	0.951224		ORC_796	0.039125	1e-05	0.960865		ORC_796	0.272204	0.727796
CEU	ORC_807	1e-05	0.0251748	1e-05	0.740046	0.00523967	0.22952			ORC_807	1e-05	0.032868	1e-05	0.0124824	0.954629		807	ORC_807	0.00520756	0.0343689	1e-05	0.960413		ORC_807	0.0345538	1e-05	0.965436		ORC_807	0.264857	0.735143
CEU	ORC_803	1e-05	0.0322577	1e-05	0.740338	1e-05	0.227375			ORC_803	1e-05	0.0415599	1e-05	0.00183067	0.956589		803	ORC_803	1e-05	0.0424849	1e-05	0.957495		ORC_803	0.0355708	1e-05	0.964419		ORC_803	0.262826	0.737174
CEU	ORC_794	1e-05	0.0460913	1e-05	0.745519	1e-05	0.20836			ORC_794	0.003193	0.0520221	1e-05	0.000391778	0.944383		794	ORC_794	0.002275	0.0529767	1e-05	0.944738		ORC_794	0.0499633	1e-05	0.950027		ORC_794	0.271702	0.728298
CEU	ORC_808	1e-05	0.0438932	1e-05	0.746735	0.000810556	0.208541			ORC_808	1e-05	0.0497829	1e-05	0.00634256	0.943855		808	ORC_808	1e-05	0.0520983	1e-05	0.947882		ORC_808	0.0461028	1e-05	0.953887		ORC_808	0.275067	0.724933
CEU	ORC_799	1e-05	0.0374858	1e-05	0.749521	1e-05	0.212963			ORC_799	1e-05	0.0457176	1e-05	1e-05	0.954252		799	ORC_799	1e-05	0.0458021	1e-05	0.954178		ORC_799	0.0342614	1e-05	0.965729		ORC_799	0.256679	0.743321
CEU	ORC_800	1e-05	0.0414421	1e-05	0.753015	1e-05	0.205513			ORC_800	0.00118544	0.0481847	1e-05	1e-05	0.95061		800	ORC_800	1e-05	0.0490949	1e-05	0.950885		ORC_800	0.0431303	1e-05	0.95686		ORC_800	0.270243	0.729757
CEU	ORC_805	1e-05	0.0338378	1e-05	0.75356	6.87778e-05	0.212513			ORC_805	1e-05	0.0395727	1e-05	0.00665067	0.953757		805	ORC_805	1.27778e-05	0.0418871	1e-05	0.95809		ORC_805	0.0361099	1e-05	0.96388		ORC_805	0.265674	0.734326
CEU	ORC_804	1.01111e-05	0.0442689	1e-05	0.758607	1e-05	0.197094			ORC_804	1.05556e-05	0.0504393	1e-05	0.000234	0.949306		804	ORC_804	1.05556e-05	0.0506956	1e-05	0.949284		ORC_804	0.0413109	1e-05	0.958679		ORC_804	0.269636	0.730364
CEU	ORC_810	1e-05	0.029517	1e-05	0.762015	1e-05	0.208438			ORC_810	1e-05	0.0366347	1e-05	9.5e-05	0.96325		810	ORC_810	1.05556e-05	0.0369379	1e-05	0.963042		ORC_810	0.0270434	1e-05	0.972947		ORC_810	0.252745	0.747255
CEU	ORC_797	1e-05	0.0420833	1.08889e-05	0.762683	1e-05	0.195203			ORC_797	1e-05	0.0478464	1e-05	1e-05	0.952124		797	ORC_797	1.03333e-05	0.0481094	1e-05	0.95187		ORC_797	0.0356337	1e-05	0.964356		ORC_797	0.262493	0.737507
CEU	ORC_806	1e-05	0.0225704	1e-05	0.77145	1e-05	0.20595			ORC_806	1e-05	0.0292299	1e-05	1e-05	0.97074		806	ORC_806	1.03333e-05	0.029117	1e-05	0.970863		ORC_806	0.0155969	1e-05	0.984393		ORC_806	0.248473	0.751527
CEU	SARD_665	0.0168088	0.000979889	1e-05	0.942183	0.00482989	0.0351888			SARD_665	0.004165	1e-05	1.55556e-05	1e-05	0.995799		665	SARD_665	0.003728	1e-05	1e-05	0.996252		SARD_665	1e-05	1e-05	0.99998		SARD_665	0.209497	0.790503
CEU	SARD_667	0.00233667	0.012917	0.00294133	0.943573	0.00244356	0.0357889			SARD_667	1e-05	0.00469511	0.00318122	1e-05	0.992104		667	SARD_667	1e-05	0.00522733	0.00198	0.992782		SARD_667	1e-05	0.00235011	0.99764		SARD_667	0.208659	0.791341
CEU	SARD_1077	0.007691	0.003161	1.03333e-05	0.947336	1e-05	0.0417916			SARD_1077	1e-05	1e-05	1.06667e-05	1e-05	0.999959		1077	SARD_1077	1e-05	1e-05	1.08889e-05	0.999969		SARD_1077	1e-05	1e-05	0.99998		SARD_1077	0.203125	0.796875
CEU	SARD_1078	0.010794	0.003791	1e-05	0.948157	0.00361833	0.0336296			SARD_1078	1.06667e-05	1e-05	1e-05	0.000419556	0.99955		1078	SARD_1078	1.02222e-05	1e-05	1e-05	0.99997		SARD_1078	1e-05	1e-05	0.99998		SARD_1078	0.210975	0.789025
CEU	SARD_1071	0.0113986	0.00339844	0.0130281	0.950482	0.0121677	0.00952544			SARD_1071	1.07778e-05	1e-05	0.0111724	0.00629533	0.982512		1071	SARD_1071	0.001659	2.95556e-05	0.0113171	0.986994		SARD_1071	1e-05	0.0109691	0.989021		SARD_1071	0.207047	0.792953
CEU	SARD_673	0.00516556	0.013527	0.0104572	0.954553	1e-05	0.0162876			SARD_673	1e-05	0.00447722	0.00673833	1e-05	0.988764		673	SARD_673	1e-05	0.005435	0.00612656	0.988429		SARD_673	1e-05	0.00629856	0.993691		SARD_673	0.201899	0.798101
CEU	SARD_1063	1e-05	0.00599033	0.000477667	0.956248	0.00912889	0.0281454			SARD_1063	1e-05	1e-05	1e-05	1e-05	0.99996		1063	SARD_1063	1e-05	1e-05	1e-05	0.99997		SARD_1063	1e-05	1e-05	0.99998		SARD_1063	0.20462	0.79538
CEU	SARD_672	0.0182172	0.000286333	1e-05	0.956793	0.00215678	0.0225369			SARD_672	0.00042	1e-05	1e-05	1e-05	0.99955		672	SARD_672	1e-05	1e-05	1e-05	0.99997		SARD_672	1e-05	1e-05	0.99998		SARD_672	0.208284	0.791716
CEU	SARD_1067	0.0155216	0.00706378	1e-05	0.960021	0.00209656	0.0152872			SARD_1067	0.00138433	0.000190333	1e-05	1e-05	0.998405		1067	SARD_1067	1.13333e-05	0.001265	1e-05	0.998714		SARD_1067	1e-05	1e-05	0.99998		SARD_1067	0.214402	0.785598
CEU	SARD_1074	0.00847911	0.00418167	0.00308722	0.961698	0.00630356	0.0162503			SARD_1074	1e-05	1e-05	0.00134556	1e-05	0.998624		1074	SARD_1074	1.03333e-05	1e-05	0.000182	0.999798		SARD_1074	1e-05	1.02222e-05	0.99998		SARD_1074	0.203587	0.796413
CEU	SARD_668	0.0133511	0.00562489	0.00376456	0.961991	1e-05	0.0152587			SARD_668	1e-05	1.27778e-05	0.00445411	1e-05	0.995513		668	SARD_668	1e-05	0.000897889	0.00368511	0.995407		SARD_668	1e-05	0.00295956	0.99703		SARD_668	0.205182	0.794818
CEU	SARD_666	0.00806578	0.00672689	1e-05	0.963538	0.00129178	0.0203673			SARD_666	1e-05	1e-05	1e-05	1e-05	0.99996		666	SARD_666	1e-05	1e-05	1e-05	0.99997		SARD_666	1e-05	1e-05	0.99998		SARD_666	0.202713	0.797287
CEU	SARD_1065	0.00646878	0.00153867	0.00351233	0.963824	0.000669778	0.0239862			SARD_1065	1e-05	1e-05	1.42222e-05	1e-05	0.999956		1065	SARD_1065	1e-05	1e-05	1.17778e-05	0.999968		SARD_1065	1e-05	1.14444e-05	0.999979		SARD_1065	0.198562	0.801438
CEU	SARD_1070	0.0108389	0.00310389	0.00253356	0.964257	0.005563	0.0137038			SARD_1070	1e-05	1e-05	0.000929889	1e-05	0.99904		1070	SARD_1070	1e-05	1e-05	1.13333e-05	0.999969		SARD_1070	1e-05	1.04444e-05	0.99998		SARD_1070	0.200918	0.799082
CEU	SARD_1069	0.0126006	0.00700944	1e-05	0.964321	0.003735	0.0123239			SARD_1069	1e-05	0.000804556	1e-05	1e-05	0.999165		1069	SARD_1069	1e-05	0.00144244	1e-05	0.998538		SARD_1069	1e-05	1.03333e-05	0.99998		SARD_1069	0.207821	0.792179
CEU	SARD_1073	1e-05	0.0136863	0.00477378	0.965494	0.000404111	0.0156317			SARD_1073	1e-05	1.3e-05	0.00231978	1e-05	0.997647		1073	SARD_1073	1e-05	1e-05	0.00150678	0.998473		SARD_1073	1e-05	0.000767889	0.999222		SARD_1073	0.203151	0.796849
CEU	SARD_1072	0.00687233	0.00755844	1e-05	0.965851	0.00732956	0.0123788			SARD_1072	1e-05	1e-05	1e-05	0.00209867	0.997871		1072	SARD_1072	1e-05	1e-05	1e-05	0.99997		SARD_1072	1e-05	1e-05	0.99998		SARD_1072	0.20768	0.79232
CEU	SARD_669	0.00560511	0.009196	0.005755	0.965999	0.00465189	0.008793			SARD_669	1e-05	1.01111e-05	0.00431367	1e-05	0.995656		669	SARD_669	1e-05	1e-05	0.00340822	0.996572		SARD_669	1e-05	0.00279178	0.997198		SARD_669	0.205742	0.794258
CEU	SARD_670	0.0116874	0.00642344	0.00327433	0.966412	0.00286756	0.009335			SARD_670	1e-05	1e-05	0.00139511	1e-05	0.998575		670	SARD_670	1e-05	1e-05	8.18889e-05	0.999898		SARD_670	1e-05	1.03333e-05	0.99998		SARD_670	0.202558	0.797442
CEU	SARD_1062	0.0124023	0.00450967	0.0105774	0.966703	0.000972889	0.00483433			SARD_1062	1.01111e-05	1.01111e-05	0.008842	1e-05	0.991128		1062	SARD_1062	1e-05	1e-05	0.00817389	0.991806		SARD_1062	1e-05	0.00760167	0.992388		SARD_1062	0.202131	0.797869
CEU	SARD_1076	1e-05	0.0104992	0.00822467	0.968539	1e-05	0.0127171			SARD_1076	1e-05	1.14444e-05	0.00366211	1e-05	0.996306		1076	SARD_1076	1e-05	1e-05	0.00270267	0.997277		SARD_1076	1e-05	0.00198144	0.998009		SARD_1076	0.195812	0.804188
CEU	SARD_674	0.00261344	0.012433	0.003755	0.968963	0.00542944	0.00680644			SARD_674	1e-05	0.00242578	0.00220456	1e-05	0.99535		674	SARD_674	1e-05	0.00324567	0.00119044	0.995554		SARD_674	1e-05	0.00116022	0.99883		SARD_674	0.206085	0.793915
CEU	SARD_1079	0.0112423	0.011031	0.002622	0.969159	0.00482711	0.00111811			SARD_1079	1e-05	0.001959	0.00140622	1e-05	0.996615		1079	SARD_1079	1e-05	0.00281478	0.000223333	0.996952		SARD_1079	1e-05	1.1e-05	0.999979		SARD_1079	0.209014	0.790986
CEU	SARD_671	0.00211422	0.000647333	0.00128389	0.971892	0.00391756	0.0201453			SARD_671	1e-05	1e-05	1.04444e-05	1e-05	0.99996		671	SARD_671	1e-05	1e-05	1.1e-05	0.999969		SARD_671	1e-05	1e-05	0.99998		SARD_671	0.196871	0.803129
CEU	SARD_1068	0.010301	0.00353667	0.00540489	0.97236	0.00408733	0.00430967			SARD_1068	1e-05	1e-05	0.00309567	1e-05	0.996874		1068	SARD_1068	1e-05	1e-05	0.00213256	0.997847		SARD_1068	1e-05	0.00108289	0.998907		SARD_1068	0.199453	0.800547
CEU	SARD_1066	0.013483	0.00114856	0.00705144	0.978297	1e-05	1e-05			SARD_1066	1e-05	1e-05	0.00481144	1e-05	0.995159		1066	SARD_1066	1e-05	1e-05	0.004137	0.995843		SARD_1066	1e-05	0.00298167	0.997008		SARD_1066	0.197385	0.802615
CEU	SARD_1075	0.00881256	0.00310778	0.00712711	0.978636	0.00230644	1e-05			SARD_1075	1e-05	1e-05	0.00555611	1e-05	0.994414		1075	SARD_1075	1e-05	1.08889e-05	0.00489044	0.995089		SARD_1075	1e-05	0.00409989	0.99589		SARD_1075	0.196528	0.803472
CEU	SARD_1064	0.00569556	0.00840156	0.001667	0.984216	1e-05	1e-05			SARD_1064	1e-05	1e-05	0.000722556	1e-05	0.999247		1064	SARD_1064	1e-05	1e-05	1.12222e-05	0.999969		SARD_1064	1e-05	1.05556e-05	0.999979		SARD_1064	0.200782	0.799218

## Sheet: Fig 1 - S3
age range	bin	count	cum
1 to 5	1	0	0
6 to 10	2	35	35
11 to 15	3	46	81
16 to 20	4	41	122
21 to 25	5	39	161
26 to 30	6	24	185
31 to 35	7	21	206
36 to 40	8	32	238
41 to 45	9	36	274
46 to 50	10	35	309
51 to 55	11	41	350
56 to 60	12	24	374
61 to 65	13	20	394
66 to 70	14	20	414
71 to 75	15	18	432
76 to 80	16	11	443
81 to 85	17	8	451
85 to 90	18	1	452
91 to 95	19	3	455
96 to 100	20	0	455
		455
															\
