# Supplementary material for: Native American genetic ancestry and pigmentation allele contributions to skin color in a Caribbean population
Source: eLife. 2023 Jun 9;12:e77514. doi: 10.7554/eLife.77514 (PMC10371226; doi:10.7554/eLife.77514)
Supplement: Figure 2—source data 1. [file elife-77514-fig2-data1.xlsx]

## Sheet: Fig 2A
SIZE - for producing conventional triangular diagrams
Data entry area						Plotting parameters area				Calculations area: do not change values (workings in red, output in blue)
								Error messages
Sample	Proportion in class (%)			Error messages		Printer correction:	1					Graph co-ordinates							Plotting parameter summary			Triangle outline
no.	Class 1	Class 2	Class 3			Tick interval (0 - 0.5):	0.1				x	y						Printer correction:	1		x	y
1	80.1877	2.71853	17.0937			Tick length (0 - 0.2):	0.03				0.275236	0.0898337						Tick interval:	0.1		0.5	0.866
2	1.85534	28.6552	69.4895			Plot lines? (Y or N):	y				0.21234	0.0325296						Tick length:	0.03		0	0
3	66.6633	4.29318	29.0435								0.263931	0.0949216						Plot lines?:	1		1	0
4	70.8804	3.35692	25.7626	must sum to 100							0.259022	0.0593046									0.5	0.866
5	66.9945	6.32704	26.6786	must sum to 100							0.363209	0.132375
6	65.3938	5.44542	29.1608								0.193549	0.0700234
7	27.5434	32.6657	39.7909								0.500053	0.142928
8	59.0526	8.30318	32.6442								0.357161	0.170666
9	29.7759	7.61768	62.6064								0.227961	0.0629592
10	74.2957	1.26721	24.437								0.188086	0.0316342
11	58.869	11.5253	29.6057								0.257061	0.118571
12	70.0552	3.85004	26.0948								0.192195	0.0534234							Tick			Left axis ticks			Right axis ticks			Left axis lines			Right axis lines			Bottom axis lines				Bottom axis ticks
13	39.9225	6.56797	53.5094	must sum to 100							0.263204	0.116795							position		x	y		x	y		x	y		x	y		x	y		x-calc	y-calc	x	y
14	69.8749	4.54375	25.5814								0.347118	0.0824768							0		0	0		1	0		0	0		1	0		0	0		0	0	0	0
15	70.555	6.50227	22.9427								0.427099	0.105743							0		-0.015	0.02598		1.03	0		1	0								-0.015	-0.02598	-0.015	-0.02598
16	82.2498	0.00100001	17.7492								0.234523	0.0766164							0		0	0		1	0											0	0	0	0
17	56.3475	6.76987	36.8827								0.33308	0.103054							0.1		0.05	0.0866		0.95	0.0866		0.95	0.0866		0.95	0.0866		0.1	0		0.1	0	0.1	0
18	72.3509	0.00100001	27.6481								0.337095	0.144913							0.1		0.035	0.11258		0.98	0.0866		0.05	0.0866		0.9	0		0.05	0.0866		0.085	-0.02598	0.085	-0.02598
19	46.2551	8.10358	45.6414								0.203574	0.077828							0.1		0.05	0.0866		0.95	0.0866											0.1	0	0.1	0
20	63.0399	7.61948	29.3405	must sum to 100							0.264253	0.121774							0.2		0.1	0.1732		0.9	0.1732		0.9	0.1732		0.9	0.1732		0.2	0		0.2	0	0.2	0
21	87.0416	0.00100001	12.9574								0.237529	0.0917398							0.2		0.085	0.19918		0.93	0.1732		0.1	0.1732		0.8	0		0.1	0.1732		0.185	-0.02598	0.185	-0.02598
22	22.0886	15.0938	62.8176								0.310271	0.102347							0.2		0.1	0.1732		0.9	0.1732											0.2	0	0.2	0
23	87.0463	0.00100001	12.9527								0.264734	0.0651251							0.3		0.15	0.2598		0.85	0.2598		0.85	0.2598		0.85	0.2598		0.3	0		0.3	0	0.3	0
24	68.9067	6.60527	24.488								0.273138	0.086393							0.3		0.135	0.28578		0.88	0.2598		0.15	0.2598		0.7	0		0.15	0.2598		0.285	-0.02598	0.285	-0.02598
25	74.8692	3.27693	21.8537	must sum to 100							0.516477	0.163645							0.3		0.15	0.2598		0.85	0.2598											0.3	0	0.3	0
26	86.3004	0.00100001	13.6986								0.189614	0.0717805							0.4		0.2	0.3464		0.8	0.3464		0.8	0.3464		0.8	0.3464		0.4	0		0.4	0	0.4	0
27	80.8465	0.00100001	19.1525								0.265569	0.0631921							0.4		0.185	0.37238		0.83	0.3464		0.2	0.3464		0.6	0		0.2	0.3464		0.385	-0.02598	0.385	-0.02598
28	26.0926	15.7428	58.1647								0.356853	0.109529							0.4		0.2	0.3464		0.8	0.3464											0.4	0	0.4	0
29	69.818	9.22279	20.9592								0.426183	0.113251							0.5		0.25	0.433		0.75	0.433		0.75	0.433		0.75	0.433		0.5	0		0.5	0	0.5	0
30	65.5756	8.88099	25.5435								0.298643	0.0933671							0.5		0.235	0.45898		0.78	0.433		0.25	0.433		0.5	0		0.25	0.433		0.485	-0.02598	0.485	-0.02598
31	79.2677	1.39661	19.3357								0.295078	0.107855							0.5		0.25	0.433		0.75	0.433											0.5	0	0.5	0
32	29.3094	15.346	55.3447								0.393738	0.100766							0.6		0.3	0.5196		0.7	0.5196		0.7	0.5196		0.7	0.5196		0.6	0		0.6	0	0.6	0
33	86.1044	0.00100001	13.8946								0.23352	0.0949302							0.6		0.285	0.54558		0.73	0.5196		0.3	0.5196		0.4	0		0.3	0.5196		0.585	-0.02598	0.585	-0.02598
34	67.9561	6.02346	26.0206	must sum to 100							0.305301	0.0976851							0.6		0.3	0.5196		0.7	0.5196											0.6	0	0.6	0
35	85.0414	0.00100001	14.9576								0.264412	0.0848289							0.7		0.35	0.6062		0.65	0.6062		0.65	0.6062		0.65	0.6062		0.7	0		0.7	0	0.7	0
36	93.9458	0.00100001	6.05316								0.253971	0.0841101							0.7		0.335	0.63218		0.68	0.6062		0.35	0.6062		0.3	0		0.35	0.6062		0.685	-0.02598	0.685	-0.02598
37	80.6106	0.00100001	19.3884								0.551716	0.14479							0.7		0.35	0.6062		0.65	0.6062											0.7	0	0.7	0
38	42.9743	6.25766	50.768								0.490055	0.113044							0.8		0.4	0.6928		0.6	0.6928		0.6	0.6928		0.6	0.6928		0.8	0		0.8	0	0.8	0
39	70.04	5.97946	23.9805								0.422664	0.0764233							0.8		0.385	0.71878		0.63	0.6928		0.4	0.6928		0.2	0		0.4	0.6928		0.785	-0.02598	0.785	-0.02598
40	68.5422	8.25818	23.1996								0.389954	0.111413							0.8		0.4	0.6928		0.6	0.6928											0.8	0	0.8	0
41	70.3387	5.54366	24.1176								0.430158	0.121704							0.9		0.45	0.7794		0.55	0.7794		0.55	0.7794		0.55	0.7794		0.9	0		0.9	0	0.9	0
42	71.9037	1.17471	26.9216								0.304583	0.0809543							0.9		0.435	0.80538		0.58	0.7794		0.45	0.7794		0.1	0		0.45	0.7794		0.885	-0.02598	0.885	-0.02598
43	42.6183	8.58479	48.797	must sum to 100							0.371504	0.13873							0.9		0.45	0.7794		0.55	0.7794											0.9	0	0.9	0
44	40.7667	18.8205	40.4128								0.337304	0.0866943							1		0.5	0.866		0.5	0.866		0.5	0.866		0.5	0.866		1	0		1	0	1	0
45	43.2766	5.36515	51.3582								0.259386	0.0712341							1		0.485	0.89198		0.53	0.866		0.5	0.866		1.11022e-16	0		0.5	0.866		0.985	-0.02598	0.985	-0.02598
46	85.449	0.00100001	14.55								0.283848	0.13292							1		0.5	0.866		0.5	0.866											1	0	1	0
47	76.195	3.24393	20.5611								0.504664	0.0912366									0.5	0.866		0.5	0.866		0.5	0.866		0.5	0.866		0	0		0	0	0	0
48	65.4245	12.803	21.7724	must sum to 100							0.297803	0.0932527									0.5	0.866		0.5	0.866		0.5	0.866		0.5	0.866		0.5	0.866		0	0	0	0
49	87.0166	1.64742	11.336								0.565997	0.197218									0.5	0.866		0.5	0.866											0	0	0	0
50	69.6054	5.05015	25.3445								0.193794	0.0811371									0.5	0.866		0.5	0.866		0.5	0.866		0.5	0.866		0	0		0	0	0	0
51	67.0988	9.5201	23.3811								0.313098	0.0948861									0.5	0.866		0.5	0.866		0.5	0.866		0.5	0.866		0.5	0.866		0	0	0	0
52	31.1839	9.47029	59.3458								0.20602	0.0793808									0.5	0.866		0.5	0.866											0	0	0	0
53	65.8878	2.56833	31.5439								0.310758	0.0716723									0.5	0.866		0.5	0.866		0.5	0.866		0.5	0.866		0	0		0	0	0	0
54	40.848	9.02319	50.1289	must sum to 100							0.292144	0.115813									0.5	0.866		0.5	0.866		0.5	0.866		0.5	0.866		0.5	0.866		0	0	0	0
55	86.157	0.00100001	13.842								0.159434	0.111218									0.5	0.866		0.5	0.866											0	0	0	0
56	67.8983	7.13557	24.9661								0.296747	0.114031									0.5	0.866		0.5	0.866		0.5	0.866		0.5	0.866		0	0		0	0	0	0
57	59.0261	6.54337	34.4305								0.318094	0.148898									0.5	0.866		0.5	0.866		0.5	0.866		0.5	0.866		0.5	0.866		0	0	0	0
58	80.7139	3.60234	15.6838								0.183243	0.03128									0.5	0.866		0.5	0.866											0	0	0	0
59	65.1089	11.471	23.4201								0.303111	0.097724									0.5	0.866		0.5	0.866		0.5	0.866		0.5	0.866		0	0		0	0	0	0
60	82.8468	0.00100001	17.1522								0.350201	0.117417									0.5	0.866		0.5	0.866		0.5	0.866		0.5	0.866		0.5	0.866		0	0	0	0
61	55.6854	7.13197	37.1827								0.303331	0.0674114									0.5	0.866		0.5	0.866											0	0	0	0
62	42.336	9.648	48.016								0.415798	0.0337282									0.5	0.866		0.5	0.866		0.5	0.866		0.5	0.866		0	0		0	0	0	0
63	27.7357	19.3981	52.8662								0.236562	0.0749268									0.5	0.866		0.5	0.866		0.5	0.866		0.5	0.866		0.5	0.866		0	0	0	0
64	60.9479	10.3714	28.6807								0.255799	0.0766294									0.5	0.866		0.5	0.866											0	0	0	0
65	70.7944	5.69656	23.509								0.700822	0.30455									0.5	0.866		0.5	0.866		0.5	0.866		0.5	0.866		0	0		0	0	0	0
66	37.1976	13.908	48.8943	must sum to 100							0.227149	0.0553979									0.5	0.866		0.5	0.866		0.5	0.866		0.5	0.866		0.5	0.866		0	0	0	0
67	67.7738	13.6401	18.5861								0.275393	0.187044									0.5	0.866		0.5	0.866											0	0	0	0
68	69.3768	14.5133	16.1099								0.468216	0.122424									0.5	0.866		0.5	0.866		0.5	0.866		0.5	0.866		0	0		0	0	0	0
69	20.3929	49.8214	29.7857								0.232404	0.0647215									0.5	0.866		0.5	0.866		0.5	0.866		0.5	0.866		0.5	0.866		0	0	0	0
70	66.2138	1.85202	31.9341	must sum to 100							0.660975	0.0892049									0.5	0.866		0.5	0.866											0	0	0	0
71	74.6906	2.60623	22.7031								0.226353	0.0817909									0.5	0.866		0.5	0.866		0.5	0.866		0.5	0.866		0	0		0	0	0	0
72	85.7858	2.63793	11.5762	must sum to 100							0.426528	0.128178									0.5	0.866		0.5	0.866		0.5	0.866		0.5	0.866		0.5	0.866		0	0	0	0
73	79.5134	3.79354	16.6932	must sum to 100							0.666863	0.152729									0.5	0.866		0.5	0.866											0	0	0	0
74	63.5845	5.92676	30.4887								0.272463	0.0693548									0.5	0.866		0.5	0.866		0.5	0.866		0.5	0.866		0	0		0	0	0	0
75	57.5108	7.51148	34.9777								0.276347	0.155888									0.5	0.866		0.5	0.866		0.5	0.866		0.5	0.866		0.5	0.866		0	0	0	0
76	69.5547	3.89164	26.5537								0.413142	0.0636875									0.5	0.866		0.5	0.866											0	0	0	0
77	75.1292	1.31541	23.5553	must sum to 100							0.440722	0.142567
78	82.4548	0.938409	16.6068								0.501973	0.125137
79	60.7487	17.4918	21.7595								0.547998	0.12234
80	28.6531	16.8075	54.5394								0.294712	0.0963471
81	33.7334	26.1388	40.1279	must sum to 100							0.417481	0.156919
82	67.6012	9.5091	22.8897								0.27327	0.0994336
83	47.3067	13.9579	38.7353								0.475345	0.0855815
84	10.5233	39.8829	49.5937	must sum to 100							0.321467	0.135545
85	51.1418	8.04353	40.8148	must sum to 100							0.466568	0.0935896
86	55.3661	13.853	30.781								0.539076	0.0907967
87	51.9666	5.03373	42.9997	must sum to 100							0.36636	0.168731
88	42.8957	3.15964	53.9446								0.545296	0.121103
89	12.1711	6.32889	81.5								0.325543	0.12222
90	0.00766318	7.1078	92.8845								0.386273	0.0898701
91	29.2095	9.65745	61.1332	must sum to 100							0.470726	0.0959357
92	83.0937	5.11475	11.7916								0.359865	0.0891495
93	50.3222	4.43296	45.245	must sum to 100							0.582669	0.120549
94	60.8578	7.34533	31.7969								0.607191	0.158385
95	1.03812	14.2855	84.6764								0.381305	0.0794544
96	24.1307	12.8559	63.0134								0.294387	0.0689183
97	75.267	0.00100001	24.732								0.599659	0.125707
98	85.3432	2.71743	11.9394								0.474596	0.182802
99	37.6555	10.8308	51.5137								0.376078	0.129833
100	79.7217	1.56092	18.7174								0.639659	0.106097
101	78.1657	0.00100001	21.8333								0.497233	0.105651
102	86.3976	0.00100001	13.6014								0.444136	0.20936
103	22.593	18.8259	58.581	must sum to 100							0.569926	0.151431
104	43.6795	24.8335	31.4869								0.449771	0.233817
105	50.6582	6.96027	42.3815								0.489131	0.158771
106	58.7258	12.1553	29.1188	must sum to 100							0.316027	0.121739
107	42.4935	2.97443	54.5319	must sum to 100							0.396905	0.0858863
108	51.0099	5.25385	43.7363	must sum to 100							0.418047	0.17242
109	62.0294	4.10484	33.8657								0.41543	0.159507
110	24.9812	20.4294	54.5893								0.556694	0.115683
111	45.2267	3.94564	50.8277								0.532959	0.131092
112	60.9909	0.00100001	39.0081								0.635501	0.292922
113	54.5241	8.56089	36.9149	must sum to 100							0.283388	0.111973
114	85.8862	0.683707	13.4301								0.553431	0.122358
115	7.38187	23.0386	69.5795								0.547647	0.132396
116	32.3756	15.2558	52.3686								0.466076	0.1927
117	74.6196	4.93565	20.4447								0.482189	0.0846808
118	73.1534	3.39923	23.4473								0.439466	0.0828639
119	89.1542	0.00100001	10.8448								0.574005	0.0559574
120	63.5423	5.56116	30.8965								0.570717	0.306216
121	71.8975	9.13919	18.9633								0.54669	0.255447
122	69.466	3.92504	26.6091	must sum to 100							0.562595	0.218775
123	57.6529	8.69779	33.6494	must sum to 100							0.672369	0.0952256
124	72.2307	2.58983	25.1794	must sum to 100							0.578255	0.157157
125	66.6314	16.7582	16.6105								0.363042	0.12178
126	47.9934	14.6908	37.3158								0.45509	0.240501
127	75.9618	1.81372	22.2245								0.651363	0.200166
128	58.836	11.1839	29.9801								0.651585	0.109969
129	63.4341	5.75886	30.8069	must sum to 100							0.607524	0.345201
130	75.644	2.92603	21.43								0.487948	0.0879864
131	13.1462	33.7929	53.0608								0.554234	0.0930899
132	62.9912	6.56757	30.4413	must sum to 100							0.635692	0.106968
133	72.4884	9.14929	18.3622	must sum to 100							0.407162	0.0718619
134	72.6377	8.33468	19.0276								0.695856	0.134057
135	44.5775	7.24147	48.181								0.636617	0.119731
136	35.7998	11.5497	52.6504	must sum to 100							0.683125	0.185491
137	69.6355	7.89048	22.474								0.599249	0.215651
138	76.3645	4.25514	19.3804								0.570728	0.125963
139	42.9433	25.9883	31.0684								0.419838	0.0937767
140	77.6249	2.96643	19.4087								0.811462	0.213492
141	41.1904	10.3695	48.4401								0.709011	0.148664
142	44.6971	12.2694	43.0334								0.741286	0.246917
143	66.2436	6.11926	27.6372								0.808922	0.113842
144	42.7866	10.7809	46.4324	must sum to 100							0.307094	0.119726
145	57.2049	4.49214	38.303								0.258958	0.168861
146	62.3763	3.31053	34.3131								0.627763	0.0847319
147	60.0044	12.6628	27.3328								0.302275	0.125114
148	40.6193	2.05302	57.3277								0.375165	0.142639
149	35.7551	5.73446	58.5105								0.286797	0.0785494
150	81.2	4.25554	14.5444								0.276141	0.108278
151	59.9621	10.6654	29.3726	must sum to 100							0.25465	0.0883848
152	43.0771	8.43118	48.4916	must sum to 100							0.512818	0.0983484
153	77.3494	3.41033	19.2403								0.262987	0.0347649
154	39.4448	10.4872	50.068								0.684357	0.0745856
155	63.3236	10.8195	25.8569								0.385952	0.0777622
156	62.7983	8.80339	28.3982	must sum to 100							0.528101	0.0912981
157	83.6899	0.00100001	16.3091								0.30311	0.0615701
158	82.8431	0.00100001	17.1559								0.319414	0.126975
159	70.0242	5.25495	24.7208								0.243121	0.0956118
160	40.849	8.57929	50.5717								0.217716	0.0293617
161	70.5992	2.11522	27.2856								0.286822	0.0622932
162	71.6859	3.84354	24.4705								0.280161	0.103667
163	73.0387	5.64956	21.3117								0.281686	0.057272
164	46.0691	10.6017	43.3292								0.202822	0.0671819
165	35.5299	11.3548	53.1153								0.632648	0.1927
166	86.9894	0.835908	12.1747								0.399868	0.0631835
167	67.6387	6.14766	26.2137								0.242182	0.082799
168	20.4807	38.3928	41.1265								0.286064	0.114965
169	74.6366	4.57365	20.7897								0.180807	0.0644773
170	26.5304	15.008	58.4617								0.514158	0.101399
171	30.6755	8.53119	60.7933								0.392464	0.141287
172	72.7582	4.86265	22.3791								0.538609	0.143989
173	77.752	3.39073	18.8572	must sum to 100							0.572195	0.110818
174	82.9628	3.47742	13.5599	must sum to 100							0.378241	0.123493
175	80.8663	3.77413	15.3595								0.489569	0.21967
176	71.3126	6.13401	22.5533	must sum to 100							0.413357	0.0794258
177	65.9302	2.07506	31.9949	must sum to 100							0.332782	0.101722
178	89.3998	3.20622	7.39397								0.499545	0.117183
179	66.371	1.42459	32.2046	must sum to 100							0.591933	0.132318
180	52.216	13.7145	34.0695								0.913028	0.132849
181	69.0381	1.76244	29.1995	must sum to 100							0.461807	0.205077
182	42.0341	7.62793	50.3378	must sum to 100							0.47922	0.134981
183	53.6815	16.4948	29.8237								0.432372	0.111956
184	77.481	4.25094	18.2681								0.343654	0.0900762
185	13.6969	10.8597	75.4434								0.35898	0.0913518
186	33.7026	10.1029	56.1946								0.506004	0.218946
187	66.4373	4.64035	28.9224								0.636792	0.170536
188	55.3687	7.78258	36.8488								0.414349	0.0977275
189											0.39618	0.106357
190											0.475038	0.212136
191											0.481862	0.19879
192											0.301943	0.0785883
193											0.728511	0.153146
194											0.552941	0.449108
195											0.271393	0.0587113
196											0.311144	0.0769204
197											0.608141	0.139295
198											0.215589	0.0347986
199											0.310909	0.0441976
200											0.462328	0.0748532
201											0.451747	0.25007
202											0.369669	0.132953
203											0.346966	0.0507777
204											0.190488	0.160987
205											0.28261	0.0979994
206											0.306455	0.0661609
207											0.360961	0.11257
208											0.298626	0.0389252
209											0.418088	0.145558
210											0.315338	0.0930224
211											0.172522	0.0499558
212											0.25835	0.0872278
213											0.447112	0.112495
214											0.199087	0.0483589
215											0.42249	0.168398
216											0.378974	0.0803169
217											0.243467	0.0877673
218											0.55708	0.0618853
219											0.543062	0.110643
220											0.302586	0.0336659
221											0.234969	0.0809751
222											0.264751	0.057802
223											0.157192	0.0522118
224											0.285062	0.0713129
225											0.830508	0.252131
226											0.319279	0.18105
227											0.258334	0.0410799
228											0.429903	0.166697
229											0.302019	0.121186
230											0.560821	0.0838901
231											0.235919	0.0676487
232											0.956176	0.0685043
233											0.656364	0.0933853
234											0.313607	0.0689746
235											0.504637	0.133957
236											0.58002	0.083044
237											0.222075	0.041241
238											0.358947	0.109318
239											0.424828	0.101149
240											0.417728	0.0942643
241											0.276548	0.117954
242											0.789389	0.126978
243											0.563119	0.102892
244											0.291468	0.0896804
245											0.467765	0.194137
246											0.227593	0.0760379
247											0.532343	0.120999
248											0.38816	0.127559
249											0.272757	0.0981034
250											0.458246	0.182106
											0.354548	0.120531
											0.214904	0.0516688
											0.61376	0.0520265
											0.307404	0.163656
											0.399695	0.102584
											0.490524	0.143419
											0.372789	0.0314705
											0.429639	0.148225
											0.437517	0.167884
											0.431737	0.111649
											0.112653	0.0949709
											0.164891	0.0442331
											0.264504	0.0989962
											0.173116	0.0318793
											0.540914	0.214783
											0.538388	0.125522
											0.381193	0.145572
											0.335797	0.0901125
											0.294693	0.036897
											0.430304	0.0848982
											0.175504	0.0321174
											0.692977	0.190087
											0.20498	0.0504806
											0.394247	0.115976
											0.414727	0.163556
											0.349576	0.0679007
											0.314178	0.0591097
											0.328066	0.0554862
											0.146947	0.0525132
											0.219303	0.0816272
											0.317567	0.136709
											0.617025	0.15553
											0.290401	0.0925669
											0.515442	0.0736641
											0.292366	0.110142
											0.373457	0.12952
											0.254949	0.0802347
											0.202511	0.0370416
											0.456155	0.101774
											0.306531	0.0693175
											0.15877	0.0614835
											0.469177	0.106553
											0.53949	0.0615051
											0.842266	0.0680497
											0.252016	0.122358
											0.18209	0.160396
											0.228064	0.0576565
											0.316899	0.106516
											0.295241	0.0858153
											0.332603	0.0850108
											0.237838	0.0415943
											0.547253	0.120288
											0.286737	0.0728007
											0.152635	0.0437629
											0.628342	0.095074
											0.405336	0.0989651
											0.379057	0.118561
											0.410197	0.0713319
											0.661471	0.100817
											0.475407	0.0985866
											0.540702	0.13542
											0.591827	0.0463592
											0.333755	0.134554
											0.270579	0.0334883
											0.183968	0.0516342
											0.212345	0.0361436
											0.443213	0.0968762
											0.220841	0.0794916
											0.332271	0.132472
											0.619336	0.252979
											0.310677	0.0771707
											0.241906	0.025714
											0.331115	0.0931584
											0.463462	0.121548
											0.454327	0.120139
											0.171764	0.0537447
											0.650122	0.12928
											0.284411	0.069767
											0.330861	0.116991
											0.36762	0.148283
											0.240034	0.019625
											0.43321	0.095682
											0.46189	0.163801
											0.559779	0.172116
											0.253485	0.113769
											0.273346	0.0594544
											0.411384	0.102985
											0.561468	0.0966251
											0.251155	0.105328
											0.50634	0.127106
											0.370752	0.10929
											0.726434	0.1408
											0.63893	0.162252
											0.665757	0.157879
											0.440904	0.105649
											0.353873	0.124443
											0.31529	0.0909093
											0.220541	0.0226301
											0.165386	0.0328691
											0.101871	0.0670875
											0.49888	0.0808599
											0.697002	0.132831
											0.164202	0.0167377
											0.439784	0.122058
											0.732554	0.112868
											0.55958	0.0490681
											0.638472	0.110088
											0.507844	0.188755
											0.385647	0.0615952
											0.336054	0.0684775
											0.222516	0.0564839
											0.500304	0.257301
											0.123202	0.0733065
											0.324881	0.189692
											0.161036	0.0624716
											0.382393	0.0843777
											0.202325	0.0514384
											0.333431	0.0540668
											0.23051	0.0199766
											0.294041	0.0794977
											0.306304	0.154651
											0.478069	0.121764
											0.125519	0.0544964
											0.168623	0.0267567
											0.146115	0.0290136
											0.133962	0.00599896
											0.35598	0.0939352
											0.148407	0.0582922
											0.170382	0.0775664
											0.20029	0.0208911
											0.300686	0.0714679
											0.279325	0.0528189
											0.289073	0.0659132
											0.167731	0.0306547
											0.357274	0.0978799
											0.441227	0.157054
											0.296003	0.0940434
											0.210873	0.0697436
											0.331164	0.074667
											0.112847	0.0440547
											0.401599	0.0846419
											0.325524	0.199103
											0.26642	0.0758162
											0.106892	0.0877682
											0.545961	0.0971819
											0.161215	0.0745501
											0.225598	0.0925608
											0.25626	0.125435
											0.331207	0.0480653
											0.250408	0.0618732
											0.293118	0.0905785
											0.0924305	0.0282939
											0.170613	0.0375517
											0.481901	0.0703802
											0.250171	0.0640798
											0.258015	0.118734
											0.222481	0.0509465
											0.158336	0.0363947
											0.609564	0.113491
											0.631091	0.148873
											0.336036	0.0888663
											0.368097	0.126698
											0.36825	0.0961756
											0.326612	0.0748852
											0.313855	0.0904936
											0.289122	0.0589495
											0.353342	0.0983718
											0.337714	0.0890595
											0.06514	0.0178557
											0.635948	0.103184
											0.671986	0.341683
											0.508655	0.158935
											0.381075	0.145115
											0.60145	0.146402
											0.290017	0.0700164
											0.455966	0.101549
											0.29638	0.0807144
											0.371284	0.0665627
											0.454584	0.13371
											0.455996	0.0771594
											0.213947	0.046716
											0.448348	0.0979016
											0.273382	0.0518169
											0.561713	0.1774
											0.451588	0.0958846
											0.287589	0.0990967
											0.317631	0.145827
											0.354235	0.0615675
											0.42777	0.0994994
											0.376255	0.164321
											0.20422	0.0630726
											0.447582	0.142517
											0.213225	0.078901
											0.23099	0.074512
											0.329438	0.0549303
											0.202968	0.0534294
											0.128319	0.0486888
											0.166984	0.0390309
											0.393819	0.139802
											0.320996	0.0436771
											0.296971	0.0491166
											0.395647	0.147812
											0.542	-1	0.157617
											0.791888	-1	0.214774
											0.801418	-1	0.241621
											0.7895	-1	0.212176
											0.501	-1	0.226899
											0.8165	-1	0.170607
											0.533	-1	0.290985
											0.387157	-1	0.245085
											0.833	-1	0.164545
											0.5795	-1	0.277994
											0.6345	-1	0.284922
											0.6995	-1	0.33342
											0.577	-1	0.336018
											0.626785	-1	0.355936
											0.676	-1	0.2702
											0.625	-1	0.171473
											0.6905	-1	0.338616
											0.636223	-1	0.336884
											0.602	-1	0.458993
											0.613	-1	0.349874
											0.563	-1	0.304841
											0.705262	-1	0.187928
											0.701321	-1	0.323027
											0.839	-1	0.192258
											0.71485	-1	0.334286
											0.9135	-1	0.035507
											0.610305	-1	0.375855
											0.6505	-1	0.248549
											0.949	-1	0.0190526
											0.802	-1	0.237291
											0.6665	-1	0.271066
											0.764	-1	0.0762102
											0.7875	-1	0.120378
											0.8045	-1	0.219104
											0.806	-1	0.0536936
											0.718394	-1	0.385381
											0.6925	-1	0.13943

## Sheet: Fig 2B
SIZE - for producing conventional triangular diagrams
Data entry area						Plotting parameters area				Calculations area: do not change values (workings in red, output in blue)
								Error messages
Sample	Proportion in class (%)			Error messages		Printer correction:	1					Graph co-ordinates							Plotting parameter summary			Triangle outline
no.	Class 1	Class 2	Class 3			Tick interval (0 - 0.5):	0.1				x	Islands (Benn Torres)	adm AFR (TGP)	NAM (Reich)	adm NAM (1KGP)	Kalinago		Printer correction:	1		x	y
1	80.1877	2.71853	17.0937			Tick length (0 - 0.2):	0.03				0.697274	0.243353						Tick interval:	0.1		0.5	0.866
2	1.85534	28.6552	69.4895			Plot lines? (Y or N):	y				0.829	0.136832						Tick length:	0.03		0	0
3	66.6633	4.29318	29.0435								0.8655	0.0892006						Plot lines?:	1		1	0
4	70.8804	3.35692	25.7626	must sum to 100							0.835409	0.155019									0.5	0.866
5	66.9945	6.32704	26.6786	must sum to 100							0.8715	0.104789
6	65.3938	5.44542	29.1608								0.870925	0.110851
7	27.5434	32.6657	39.7909								0.900937	0.0710141
8	59.0526	8.30318	32.6442								0.859433	0.146358
9	29.7759	7.61768	62.6064								0.866627		0.171088
10	74.2957	1.26721	24.437								0.94141		0.0993454
11	58.869	11.5253	29.6057								0			0
12	70.0552	3.85004	26.0948								0			0					Tick			Left axis ticks			Right axis ticks			Left axis lines			Right axis lines			Bottom axis lines				Bottom axis ticks						0
13	39.9225	6.56797	53.5094	must sum to 100							0			0					position		x	y		x	y		x	y		x	y		x	y		x-calc	y-calc	x	y					0
14	69.8749	4.54375	25.5814								0			0					0		0	0		1	0		0	0		1	0		0	0		0	0	0	0					0
15	70.555	6.50227	22.9427								0			0					0		-0.015	0.02598		1.03	0		1	0								-0.015	-0.02598	-0.015	-0.02598					0
16	82.2498	0.00100001	17.7492								0			0					0		0	0		1	0											0	0	0	0					0
17	56.3475	6.76987	36.8827								0.00325			0.0033775					0.1		0.05	0.0866		0.95	0.0866		0.95	0.0866		0.95	0.0866		0.1	0		0.1	0	0.1	0					0
18	72.3509	0.00100001	27.6481								0.0057			0.00987269					0.1		0.035	0.11258		0.98	0.0866		0.05	0.0866		0.9	0		0.05	0.0866		0.085	-0.02598	0.085	-0.02598					0
19	46.2551	8.10358	45.6414								0.0114			0.00311769					0.1		0.05	0.0866		0.95	0.0866											0.1	0	0.1	0					0
20	63.0399	7.61948	29.3405	must sum to 100							0.0121			0.00762102					0.2		0.1	0.1732		0.9	0.1732		0.9	0.1732		0.9	0.1732		0.2	0		0.2	0	0.2	0					0
21	87.0416	0.00100001	12.9574								0.01345			0.0104789					0.2		0.085	0.19918		0.93	0.1732		0.1	0.1732		0.8	0		0.1	0.1732		0.185	-0.02598	0.185	-0.02598					0
22	22.0886	15.0938	62.8176								0.0127			0.0204382					0.2		0.1	0.1732		0.9	0.1732											0.2	0	0.2	0					0
23	87.0463	0.00100001	12.9527								0.01455			0.0238157					0.3		0.15	0.2598		0.85	0.2598		0.85	0.2598		0.85	0.2598		0.3	0		0.3	0	0.3	0					0
24	68.9067	6.60527	24.488								0.02705			0.00926647					0.3		0.135	0.28578		0.88	0.2598		0.15	0.2598		0.7	0		0.15	0.2598		0.285	-0.02598	0.285	-0.02598					0
25	74.8692	3.27693	21.8537	must sum to 100							0.01745			0.0277994					0.3		0.15	0.2598		0.85	0.2598											0.3	0	0.3	0					0
26	86.3004	0.00100001	13.6986								0.02095			0.0321295					0.4		0.2	0.3464		0.8	0.3464		0.8	0.3464		0.8	0.3464		0.4	0		0.4	0	0.4	0					0
27	80.8465	0.00100001	19.1525								0.0249			0.027886					0.4		0.185	0.37238		0.83	0.3464		0.2	0.3464		0.6	0		0.2	0.3464		0.385	-0.02598	0.385	-0.02598					0
28	26.0926	15.7428	58.1647								0.0225686			0.0342281					0.4		0.2	0.3464		0.8	0.3464											0.4	0	0.4	0					0
29	69.818	9.22279	20.9592								0.0423			0.0658179					0.5		0.25	0.433		0.75	0.433		0.75	0.433		0.75	0.433		0.5	0		0.5	0	0.5	0					0
30	65.5756	8.88099	25.5435								0.05165			0.0568979					0.5		0.235	0.45898		0.78	0.433		0.25	0.433		0.5	0		0.25	0.433		0.485	-0.02598	0.485	-0.02598					0
31	79.2677	1.39661	19.3357								0.04365			0.0740452					0.5		0.25	0.433		0.75	0.433											0.5	0	0.5	0					0
32	29.3094	15.346	55.3447								0.0548061			0.0729017					0.6		0.3	0.5196		0.7	0.5196		0.7	0.5196		0.7	0.5196		0.6	0		0.6	0	0.6	0					0
33	86.1044	0.00100001	13.8946								0.06845			0.0577639					0.6		0.285	0.54558		0.73	0.5196		0.3	0.5196		0.4	0		0.3	0.5196		0.585	-0.02598	0.585	-0.02598					0
34	67.9561	6.02346	26.0206	must sum to 100							0.05955			0.0946566					0.6		0.3	0.5196		0.7	0.5196											0.6	0	0.6	0					0
35	85.0414	0.00100001	14.9576								0.05975			0.095869					0.7		0.35	0.6062		0.65	0.6062		0.65	0.6062		0.65	0.6062		0.7	0		0.7	0	0.7	0					0
36	93.9458	0.00100001	6.05316								0.08235			0.135187					0.7		0.335	0.63218		0.68	0.6062		0.35	0.6062		0.3	0		0.35	0.6062		0.685	-0.02598	0.685	-0.02598					0
37	80.6106	0.00100001	19.3884								0.09465			0.163939					0.7		0.35	0.6062		0.65	0.6062											0.7	0	0.7	0					0
38	42.9743	6.25766	50.768								0.1423			0.144799					0.8		0.4	0.6928		0.6	0.6928		0.6	0.6928		0.6	0.6928		0.8	0		0.8	0	0.8	0					0
39	70.04	5.97946	23.9805								0.13915			0.195462					0.8		0.385	0.71878		0.63	0.6928		0.4	0.6928		0.2	0		0.4	0.6928		0.785	-0.02598	0.785	-0.02598					0
40	68.5422	8.25818	23.1996								0.13725			0.237724					0.8		0.4	0.6928		0.6	0.6928											0.8	0	0.8	0					0
41	70.3387	5.54366	24.1176								0.14305			0.24777					0.9		0.45	0.7794		0.55	0.7794		0.55	0.7794		0.55	0.7794		0.9	0		0.9	0	0.9	0					0
42	71.9037	1.17471	26.9216								0.1521			0.256344					0.9		0.435	0.80538		0.58	0.7794		0.45	0.7794		0.1	0		0.45	0.7794		0.885	-0.02598	0.885	-0.02598					0
43	42.6183	8.58479	48.797	must sum to 100							0.19005			0.328483					0.9		0.45	0.7794		0.55	0.7794											0.9	0	0.9	0					0
44	40.7667	18.8205	40.4128								0.19805			0.326751					1		0.5	0.866		0.5	0.866		0.5	0.866		0.5	0.866		1	0		1	0	1	0					0
45	43.2766	5.36515	51.3582								0.105597				0.139389				1		0.485	0.89198		0.53	0.866		0.5	0.866		1.11022e-16	0		0.5	0.866		0.985	-0.02598	0.985	-0.02598
46	85.449	0.00100001	14.55								0.267089				0.393972				1		0.5	0.866		0.5	0.866											1	0	1	0
47	76.195	3.24393	20.5611								0.398711				0.551864						0.5	0.866		0.5	0.866		0.5	0.866		0.5	0.866		0	0		0	0	0	0
48	65.4245	12.803	21.7724	must sum to 100							0.494908				0.616782						0.5	0.866		0.5	0.866		0.5	0.866		0.5	0.866		0.5	0.866		0	0	0	0
49	87.0166	1.64742	11.336								0.379					0.1057					0.5	0.866		0.5	0.866											0	0	0	0
50	69.6054	5.05015	25.3445																		0.5	0.866		0.5	0.866		0.5	0.866		0.5	0.866		0	0		0	0	0	0
51	67.0988	9.5201	23.3811																		0.5	0.866		0.5	0.866		0.5	0.866		0.5	0.866		0.5	0.866		0	0	0	0
52	31.1839	9.47029	59.3458																		0.5	0.866		0.5	0.866											0	0	0	0
53	65.8878	2.56833	31.5439																		0.5	0.866		0.5	0.866		0.5	0.866		0.5	0.866		0	0		0	0	0	0
54	40.848	9.02319	50.1289	must sum to 100																	0.5	0.866		0.5	0.866		0.5	0.866		0.5	0.866		0.5	0.866		0	0	0	0
55	86.157	0.00100001	13.842																		0.5	0.866		0.5	0.866											0	0	0	0
56	67.8983	7.13557	24.9661																		0.5	0.866		0.5	0.866		0.5	0.866		0.5	0.866		0	0		0	0	0	0
57	59.0261	6.54337	34.4305																		0.5	0.866		0.5	0.866		0.5	0.866		0.5	0.866		0.5	0.866		0	0	0	0
58	80.7139	3.60234	15.6838																		0.5	0.866		0.5	0.866											0	0	0	0
59	65.1089	11.471	23.4201																		0.5	0.866		0.5	0.866		0.5	0.866		0.5	0.866		0	0		0	0	0	0
60	82.8468	0.00100001	17.1522																		0.5	0.866		0.5	0.866		0.5	0.866		0.5	0.866		0.5	0.866		0	0	0	0
61	55.6854	7.13197	37.1827																		0.5	0.866		0.5	0.866											0	0	0	0
62	42.336	9.648	48.016																		0.5	0.866		0.5	0.866		0.5	0.866		0.5	0.866		0	0		0	0	0	0
63	27.7357	19.3981	52.8662																		0.5	0.866		0.5	0.866		0.5	0.866		0.5	0.866		0.5	0.866		0	0	0	0
64	60.9479	10.3714	28.6807																		0.5	0.866		0.5	0.866											0	0	0	0
65	70.7944	5.69656	23.509																		0.5	0.866		0.5	0.866		0.5	0.866		0.5	0.866		0	0		0	0	0	0
66	37.1976	13.908	48.8943	must sum to 100																	0.5	0.866		0.5	0.866		0.5	0.866		0.5	0.866		0.5	0.866		0	0	0	0
67	67.7738	13.6401	18.5861																		0.5	0.866		0.5	0.866											0	0	0	0
68	69.3768	14.5133	16.1099																		0.5	0.866		0.5	0.866		0.5	0.866		0.5	0.866		0	0		0	0	0	0
69	20.3929	49.8214	29.7857																		0.5	0.866		0.5	0.866		0.5	0.866		0.5	0.866		0.5	0.866		0	0	0	0
70	66.2138	1.85202	31.9341	must sum to 100																	0.5	0.866		0.5	0.866											0	0	0	0
71	74.6906	2.60623	22.7031																		0.5	0.866		0.5	0.866		0.5	0.866		0.5	0.866		0	0		0	0	0	0
72	85.7858	2.63793	11.5762	must sum to 100																	0.5	0.866		0.5	0.866		0.5	0.866		0.5	0.866		0.5	0.866		0	0	0	0
73	79.5134	3.79354	16.6932	must sum to 100																	0.5	0.866		0.5	0.866											0	0	0	0
74	63.5845	5.92676	30.4887																		0.5	0.866		0.5	0.866		0.5	0.866		0.5	0.866		0	0		0	0	0	0
75	57.5108	7.51148	34.9777																		0.5	0.866		0.5	0.866		0.5	0.866		0.5	0.866		0.5	0.866		0	0	0	0
76	69.5547	3.89164	26.5537																		0.5	0.866		0.5	0.866											0	0	0	0
77	75.1292	1.31541	23.5553	must sum to 100
78	82.4548	0.938409	16.6068
79	60.7487	17.4918	21.7595
80	28.6531	16.8075	54.5394
81	33.7334	26.1388	40.1279	must sum to 100
82	67.6012	9.5091	22.8897
83	47.3067	13.9579	38.7353
84	10.5233	39.8829	49.5937	must sum to 100
85	51.1418	8.04353	40.8148	must sum to 100
86	55.3661	13.853	30.781
87	51.9666	5.03373	42.9997	must sum to 100
88	42.8957	3.15964	53.9446
89	12.1711	6.32889	81.5
90	0.00766318	7.1078	92.8845
91	29.2095	9.65745	61.1332	must sum to 100
92	83.0937	5.11475	11.7916
93	50.3222	4.43296	45.245	must sum to 100
94	60.8578	7.34533	31.7969
95	1.03812	14.2855	84.6764
96	24.1307	12.8559	63.0134
97	75.267	0.00100001	24.732
98	85.3432	2.71743	11.9394
99	37.6555	10.8308	51.5137
100	79.7217	1.56092	18.7174
101	78.1657	0.00100001	21.8333
102	86.3976	0.00100001	13.6014
103	22.593	18.8259	58.581	must sum to 100
104	43.6795	24.8335	31.4869
105	50.6582	6.96027	42.3815
106	58.7258	12.1553	29.1188	must sum to 100
107	42.4935	2.97443	54.5319	must sum to 100
108	51.0099	5.25385	43.7363	must sum to 100
109	62.0294	4.10484	33.8657
110	24.9812	20.4294	54.5893
111	45.2267	3.94564	50.8277
112	60.9909	0.00100001	39.0081
113	54.5241	8.56089	36.9149	must sum to 100
114	85.8862	0.683707	13.4301
115	7.38187	23.0386	69.5795
116	32.3756	15.2558	52.3686
117	74.6196	4.93565	20.4447
118	73.1534	3.39923	23.4473
119	89.1542	0.00100001	10.8448
120	63.5423	5.56116	30.8965
121	71.8975	9.13919	18.9633
122	69.466	3.92504	26.6091	must sum to 100
123	57.6529	8.69779	33.6494	must sum to 100
124	72.2307	2.58983	25.1794	must sum to 100
125	66.6314	16.7582	16.6105
126	47.9934	14.6908	37.3158
127	75.9618	1.81372	22.2245
128	58.836	11.1839	29.9801
129	63.4341	5.75886	30.8069	must sum to 100
130	75.644	2.92603	21.43
131	13.1462	33.7929	53.0608
132	62.9912	6.56757	30.4413	must sum to 100
133	72.4884	9.14929	18.3622	must sum to 100
134	72.6377	8.33468	19.0276
135	44.5775	7.24147	48.181
136	35.7998	11.5497	52.6504	must sum to 100
137	69.6355	7.89048	22.474
138	76.3645	4.25514	19.3804
139	42.9433	25.9883	31.0684
140	77.6249	2.96643	19.4087
141	41.1904	10.3695	48.4401
142	44.6971	12.2694	43.0334
143	66.2436	6.11926	27.6372
144	42.7866	10.7809	46.4324	must sum to 100
145	57.2049	4.49214	38.303
146	62.3763	3.31053	34.3131
147	60.0044	12.6628	27.3328
148	40.6193	2.05302	57.3277
149	35.7551	5.73446	58.5105
150	81.2	4.25554	14.5444
151	59.9621	10.6654	29.3726	must sum to 100
152	43.0771	8.43118	48.4916	must sum to 100
153	77.3494	3.41033	19.2403
154	39.4448	10.4872	50.068
155	63.3236	10.8195	25.8569
156	62.7983	8.80339	28.3982	must sum to 100
157	83.6899	0.00100001	16.3091
158	82.8431	0.00100001	17.1559
159	70.0242	5.25495	24.7208
160	40.849	8.57929	50.5717
161	70.5992	2.11522	27.2856
162	71.6859	3.84354	24.4705
163	73.0387	5.64956	21.3117
164	46.0691	10.6017	43.3292
165	35.5299	11.3548	53.1153
166	86.9894	0.835908	12.1747
167	67.6387	6.14766	26.2137
168	20.4807	38.3928	41.1265
169	74.6366	4.57365	20.7897
170	26.5304	15.008	58.4617
171	30.6755	8.53119	60.7933
172	72.7582	4.86265	22.3791
173	77.752	3.39073	18.8572	must sum to 100
174	82.9628	3.47742	13.5599	must sum to 100
175	80.8663	3.77413	15.3595
176	71.3126	6.13401	22.5533	must sum to 100
177	65.9302	2.07506	31.9949	must sum to 100
178	89.3998	3.20622	7.39397
179	66.371	1.42459	32.2046	must sum to 100
180	52.216	13.7145	34.0695
181	69.0381	1.76244	29.1995	must sum to 100
182	42.0341	7.62793	50.3378	must sum to 100
183	53.6815	16.4948	29.8237
184	77.481	4.25094	18.2681
185	13.6969	10.8597	75.4434
186	33.7026	10.1029	56.1946
187	66.4373	4.64035	28.9224
188	55.3687	7.78258	36.8488
189
190
191
192
193
194
195
196
197
198
199
200
201
202
203
204
205
206
207
208
209
210
211
212
213
214
215
216
217
218
219
220
221
222
223
224
225
226											-1	-1
227											-1	-1
228											-1	-1
229											-1	-1
230											-1	-1
231											-1	-1
232											-1	-1
233											-1	-1
234											-1	-1
235											-1	-1
236											-1	-1
237											-1	-1
238											-1	-1
239											-1	-1
240											-1	-1
241											-1	-1
242											-1	-1
243											-1	-1
244											-1	-1
245											-1	-1
246											-1	-1
247											-1	-1
248											-1	-1
249											-1	-1
250											-1	-1
											To expand the number of clasts, copy the contents of columns A-J into the rows below.

## Sheet: Fig 2 - S1
IID	PC1	Kalinago	AFR	NAM	CSA	EAS	EUR	nAFR/ME	OCE	Kalinago	AFR	NAM	CSA	EAS	EUR	nAFR/ME	OCE	POP	cluster
BIAK_454	0.0517	-0.0817	-0.0817							-0.01	-0.01							BIAK	AFR
BIAK_455	0.0515	-0.0828	-0.0828							-0.009	-0.009							BIAK	AFR
BIAK_457	0.0514	-0.0824	-0.0824							-0.0079	-0.0079							BIAK	AFR
BIAK_458	0.0512	-0.0823	-0.0823							-0.0082	-0.0082							BIAK	AFR
BIAK_459	0.0515	-0.0814	-0.0814							-0.0089	-0.0089							BIAK	AFR
BIAK_460	0.0508	-0.0818	-0.0818							-0.0084	-0.0084							BIAK	AFR
BIAK_461	0.0516	-0.0829	-0.0829							-0.0098	-0.0098							BIAK	AFR
BIAK_464	0.0513	-0.0824	-0.0824							-0.0094	-0.0094							BIAK	AFR
BIAK_465	0.0519	-0.0831	-0.0831							-0.0086	-0.0086							BIAK	AFR
BIAK_466	0.051	-0.0826	-0.0826							-0.0086	-0.0086							BIAK	AFR
BIAK_469	0.0518	-0.0816	-0.0816							-0.0087	-0.0087							BIAK	AFR
BIAK_470	0.0511	-0.0831	-0.0831							-0.0086	-0.0086							BIAK	AFR
BIAK_472	0.0514	-0.0818	-0.0818							-0.008	-0.008							BIAK	AFR
BIAK_473	0.051	-0.0827	-0.0827							-0.0088	-0.0088							BIAK	AFR
BIAK_475	0.0515	-0.0824	-0.0824							-0.0089	-0.0089							BIAK	AFR
BIAK_479	0.0514	-0.0819	-0.0819							-0.0085	-0.0085							BIAK	AFR
BIAK_985	0.052	-0.0828	-0.0828							-0.0085	-0.0085							BIAK	AFR
BIAK_986	0.0516	-0.0821	-0.0821							-0.008	-0.008							BIAK	AFR
BIAK_1086	0.0512	-0.0814	-0.0814							-0.0068	-0.0068							BIAK	AFR
BIAK_1090	0.0513	-0.0821	-0.0821							-0.0083	-0.0083							BIAK	AFR
BIAK_1094	0.0516	-0.0814	-0.0814							-0.0083	-0.0083							BIAK	AFR
KENYA_1405	0.0479	-0.0723	-0.0723							-0.0064	-0.0064							KENYA	AFR
KENYA_1406	0.0473	-0.0711	-0.0711							-0.0069	-0.0069							KENYA	AFR
KENYA_1408	0.0469	-0.0705	-0.0705							-0.0068	-0.0068							KENYA	AFR
KENYA_1411	0.0451	-0.0667	-0.0667							-0.0047	-0.0047							KENYA	AFR
KENYA_1412	0.0471	-0.0721	-0.0721							-0.0061	-0.0061							KENYA	AFR
KENYA_1414	0.0469	-0.0716	-0.0716							-0.0055	-0.0055							KENYA	AFR
KENYA_1415	0.0438	-0.062	-0.062							-0.0038	-0.0038							KENYA	AFR
KENYA_1416	0.0451	-0.0616	-0.0616							-0.0024	-0.0024							KENYA	AFR
KENYA_1417	0.0467	-0.0708	-0.0708							-0.0057	-0.0057							KENYA	AFR
KENYA_1418	0.0475	-0.0719	-0.0719							-0.0051	-0.0051							KENYA	AFR
KENYA_1419	0.0475	-0.0715	-0.0715							-0.0057	-0.0057							KENYA	AFR
MAND_904	0.0482	-0.0733	-0.0733							-0.0062	-0.0062							MAND	AFR
MAND_905	0.0481	-0.072	-0.072							-0.0062	-0.0062							MAND	AFR												s
MAND_906	0.0478	-0.0717	-0.0717							-0.0065	-0.0065							MAND	AFR
MAND_907	0.0486	-0.0729	-0.0729							-0.006	-0.006							MAND	AFR
MAND_908	0.0486	-0.0733	-0.0733							-0.0055	-0.0055							MAND	AFR
MAND_909	0.0486	-0.0731	-0.0731							-0.0062	-0.0062							MAND	AFR
MAND_910	0.048	-0.0723	-0.0723							-0.0064	-0.0064							MAND	AFR
MAND_911	0.0479	-0.0713	-0.0713							-0.0056	-0.0056							MAND	AFR
MAND_912	0.048	-0.0729	-0.0729							-0.0047	-0.0047							MAND	AFR
MAND_913	0.0481	-0.073	-0.073							-0.0051	-0.0051							MAND	AFR
MAND_914	0.0478	-0.0721	-0.0721							-0.0062	-0.0062							MAND	AFR
MAND_915	0.0478	-0.0711	-0.0711							-0.0062	-0.0062							MAND	AFR
MAND_917	0.0475	-0.0722	-0.0722							-0.0052	-0.0052							MAND	AFR
MAND_918	0.0475	-0.0697	-0.0697							-0.0042	-0.0042							MAND	AFR
MAND_1199	0.0479	-0.0733	-0.0733							-0.0058	-0.0058							MAND	AFR
MAND_1200	0.0481	-0.0731	-0.0731							-0.0068	-0.0068							MAND	AFR
MAND_1201	0.0484	-0.0735	-0.0735							-0.0054	-0.0054							MAND	AFR
MAND_1202	0.048	-0.0731	-0.0731							-0.0055	-0.0055							MAND	AFR
MAND_1283	0.048	-0.0715	-0.0715							-0.0065	-0.0065							MAND	AFR
MAND_1284	0.0483	-0.0737	-0.0737							-0.0064	-0.0064							MAND	AFR
MAND_1285	0.0489	-0.0723	-0.0723							-0.0057	-0.0057							MAND	AFR
MAND_1286	0.0484	-0.0721	-0.0721							-0.0056	-0.0056							MAND	AFR
MBUT_449	0.0521	-0.0835	-0.0835							-0.0085	-0.0085							MBUT	AFR
MBUT_450	0.052	-0.0842	-0.0842							-0.0083	-0.0083							MBUT	AFR
MBUT_456	0.0517	-0.0844	-0.0844							-0.0089	-0.0089							MBUT	AFR
MBUT_462	0.0518	-0.0834	-0.0834							-0.009	-0.009							MBUT	AFR
MBUT_463	0.052	-0.0844	-0.0844							-0.009	-0.009							MBUT	AFR
MBUT_467	0.052	-0.0842	-0.0842							-0.0097	-0.0097							MBUT	AFR
MBUT_471	0.0519	-0.0845	-0.0845							-0.0095	-0.0095							MBUT	AFR
MBUT_474	0.0519	-0.0838	-0.0838							-0.0099	-0.0099							MBUT	AFR
MBUT_476	0.0515	-0.0847	-0.0847							-0.0085	-0.0085							MBUT	AFR
MBUT_478	0.052	-0.0836	-0.0836							-0.0088	-0.0088							MBUT	AFR
MBUT_982	0.0516	-0.0843	-0.0843							-0.0082	-0.0082							MBUT	AFR
MBUT_984	0.0514	-0.0838	-0.0838							-0.0092	-0.0092							MBUT	AFR
MBUT_1081	0.0516	-0.0838	-0.0838							-0.0089	-0.0089							MBUT	AFR
SABANT_993	0.0491	-0.0766	-0.0766							-0.0078	-0.0078							SABANT	AFR
SABANT_994	0.0491	-0.0766	-0.0766							-0.0059	-0.0059							SABANT	AFR
SABANT_1028	0.0479	-0.0746	-0.0746							-0.0054	-0.0054							SABANT	AFR
SABANT_1030	0.0494	-0.0782	-0.0782							-0.0062	-0.0062							SABANT	AFR
SABANT_1031	0.0486	-0.075	-0.075							-0.0064	-0.0064							SABANT	AFR
SABANT_1033	0.0491	-0.0757	-0.0757							-0.006	-0.006							SABANT	AFR
SABANT_1034	0.0489	-0.075	-0.075							-0.0063	-0.0063							SABANT	AFR
SABANT_1035	0.049	-0.0752	-0.0752							-0.0066	-0.0066							SABANT	AFR
SAN_991	0.0511	-0.0807	-0.0807							-0.008	-0.008							SAN	AFR
SAN_992	0.0503	-0.0802	-0.0802							-0.0083	-0.0083							SAN	AFR
SAN_1029	0.0506	-0.0808	-0.0808							-0.0077	-0.0077							SAN	AFR
SAN_1032	0.0509	-0.0807	-0.0807							-0.0081	-0.0081							SAN	AFR
SAN_1036	0.0507	-0.0805	-0.0805							-0.0086	-0.0086							SAN	AFR
YOR_920	0.0488	-0.0751	-0.0751							-0.0055	-0.0055							YOR	AFR
YOR_924	0.0487	-0.0742	-0.0742							-0.0054	-0.0054							YOR	AFR
YOR_925	0.0482	-0.0741	-0.0741							-0.0064	-0.0064							YOR	AFR
YOR_926	0.049	-0.0749	-0.0749							-0.0032	-0.0032							YOR	AFR
YOR_927	0.0486	-0.0746	-0.0746							-0.0066	-0.0066							YOR	AFR
YOR_928	0.0486	-0.0744	-0.0744							-0.0069	-0.0069							YOR	AFR
YOR_929	0.0484	-0.0746	-0.0746							-0.0071	-0.0071							YOR	AFR
YOR_930	0.0483	-0.0743	-0.0743							-0.0073	-0.0073							YOR	AFR
YOR_931	0.0486	-0.0744	-0.0744							-0.0058	-0.0058							YOR	AFR
YOR_932	0.0484	-0.075	-0.075							-0.0051	-0.0051							YOR	AFR
YOR_933	0.0488	-0.0757	-0.0757							-0.0056	-0.0056							YOR	AFR
YOR_934	0.0484	-0.074	-0.074							-0.0056	-0.0056							YOR	AFR
YOR_935	0.0493	-0.0747	-0.0747							-0.0058	-0.0058							YOR	AFR
YOR_936	0.0488	-0.0752	-0.0752							-0.0047	-0.0047							YOR	AFR
YOR_937	0.0486	-0.0747	-0.0747							-0.0062	-0.0062							YOR	AFR
YOR_938	0.0487	-0.0738	-0.0738							-0.0072	-0.0072							YOR	AFR
YOR_939	0.0488	-0.0739	-0.0739							-0.0058	-0.0058							YOR	AFR
YOR_940	0.049	-0.0755	-0.0755							-0.0054	-0.0054							YOR	AFR
YOR_941	0.0486	-0.0748	-0.0748							-0.0079	-0.0079							YOR	AFR
YOR_942	0.0485	-0.0749	-0.0749							-0.0069	-0.0069							YOR	AFR
YOR_943	0.0481	-0.074	-0.074							-0.0055	-0.0055							YOR	AFR
COL_702	-0.0437	-0.0061		-0.0061						-0.1128		-0.1128						COL	AMR
COL_703	-0.0335	-0.0058		-0.0058						-0.0976		-0.0976						COL	AMR
COL_704	-0.0435	-0.0057		-0.0057						-0.1104		-0.1104						COL	AMR
COL_706	-0.0443	-0.0061		-0.0061						-0.1134		-0.1134						COL	AMR
COL_708	-0.044	-0.0064		-0.0064						-0.1162		-0.1162						COL	AMR
COL_710	-0.0442	-0.0055		-0.0055						-0.1142		-0.1142						COL	AMR
COL_970	-0.0433	-0.0059		-0.0059						-0.1132		-0.1132						COL	AMR
KAR_995	-0.0464	-0.0052		-0.0052						-0.1309		-0.1309						KAR	AMR
KAR_998	-0.0457	-0.0052		-0.0052						-0.1323		-0.1323						KAR	AMR
KAR_999	-0.0462	-0.0056		-0.0056						-0.1332		-0.1332						KAR	AMR
KAR_1001	-0.0455	-0.0047		-0.0047						-0.1311		-0.1311						KAR	AMR
KAR_1003	-0.0458	-0.0056		-0.0056						-0.1278		-0.1278						KAR	AMR
KAR_1006	-0.0459	-0.0042		-0.0042						-0.132		-0.132						KAR	AMR
KAR_1009	-0.044	-0.0059		-0.0059						-0.1132		-0.1132						KAR	AMR
KAR_1010	-0.0459	-0.0054		-0.0054						-0.131		-0.131						KAR	AMR
KAR_1012	-0.0451	-0.0051		-0.0051						-0.134		-0.134						KAR	AMR
KAR_1013	-0.046	-0.0063		-0.0063						-0.1317		-0.1317						KAR	AMR
KAR_1014	-0.0453	-0.0055		-0.0055						-0.1309		-0.1309						KAR	AMR
KAR_1015	-0.0457	-0.0051		-0.0051						-0.1328		-0.1328						KAR	AMR
KAR_1018	-0.0467	-0.0058		-0.0058						-0.1287		-0.1287						KAR	AMR
KAR_1019	-0.0466	-0.0055		-0.0055						-0.1345		-0.1345						KAR	AMR
MAYA_854	-0.0368	-0.0032		-0.0032						-0.098		-0.098						MAYA	AMR
MAYA_855	-0.0427	-0.004		-0.004						-0.1025		-0.1025						MAYA	AMR
MAYA_856	-0.0402	-0.0025		-0.0025						-0.1001		-0.1001						MAYA	AMR
MAYA_857	-0.0424	-0.005		-0.005						-0.1062		-0.1062						MAYA	AMR
MAYA_858	-0.0388	-0.0027		-0.0027						-0.0984		-0.0984						MAYA	AMR
MAYA_859	-0.0385	-0.0046		-0.0046						-0.1017		-0.1017						MAYA	AMR
MAYA_860	-0.021	0.0035		0.0035						-0.0719		-0.0719						MAYA	AMR
MAYA_861	-0.0308	-0.002		-0.002						-0.0882		-0.0882						MAYA	AMR
MAYA_862	-0.0371	-0.0014		-0.0014						-0.096		-0.096						MAYA	AMR
MAYA_863	-0.0357	-0.0067		-0.0067						-0.0982		-0.0982						MAYA	AMR
MAYA_864	-0.0396	-0.0037		-0.0037						-0.1012		-0.1012						MAYA	AMR
MAYA_865	-0.0406	-0.005		-0.005						-0.1043		-0.1043						MAYA	AMR
MAYA_868	-0.0326	-0.0037		-0.0037						-0.0909		-0.0909						MAYA	AMR
MAYA_869	-0.0312	-0.0004		-0.0004						-0.0885		-0.0885						MAYA	AMR
MAYA_870	-0.0396	-0.0031		-0.0031						-0.1		-0.1						MAYA	AMR
MAYA_871	-0.0242	0.0038		0.0038						-0.078		-0.078						MAYA	AMR
MAYA_872	-0.0391	-0.0038		-0.0038						-0.1008		-0.1008						MAYA	AMR
MAYA_873	-0.0403	-0.0035		-0.0035						-0.1065		-0.1065						MAYA	AMR
MAYA_875	-0.0357	-0.0054		-0.0054						-0.0969		-0.0969						MAYA	AMR
MAYA_876	-0.0248	0.0042		0.0042						-0.0767		-0.0767						MAYA	AMR
MAYA_877	-0.0357	-0.0008		-0.0008						-0.0939		-0.0939						MAYA	AMR
PIMA_1037	-0.0412	-0.0043		-0.0043						-0.104		-0.104						PIMA	AMR
PIMA_1041	-0.0428	-0.0054		-0.0054						-0.1086		-0.1086						PIMA	AMR
PIMA_1043	-0.0439	-0.0049		-0.0049						-0.1102		-0.1102						PIMA	AMR
PIMA_1044	-0.0438	-0.0055		-0.0055						-0.1094		-0.1094						PIMA	AMR
PIMA_1047	-0.043	-0.0057		-0.0057						-0.106		-0.106						PIMA	AMR
PIMA_1050	-0.0405	-0.0033		-0.0033						-0.106		-0.106						PIMA	AMR
PIMA_1051	-0.0406	-0.0044		-0.0044						-0.1028		-0.1028						PIMA	AMR
PIMA_1053	-0.0433	-0.0055		-0.0055						-0.108		-0.108						PIMA	AMR
PIMA_1055	-0.0392	-0.0042		-0.0042						-0.1029		-0.1029						PIMA	AMR
PIMA_1056	-0.0434	-0.0063		-0.0063						-0.1125		-0.1125						PIMA	AMR
PIMA_1057	-0.0425	-0.0055		-0.0055						-0.1063		-0.1063						PIMA	AMR
PIMA_1058	-0.039	-0.0034		-0.0034						-0.1017		-0.1017						PIMA	AMR
PIMA_1059	-0.0412	-0.0041		-0.0041						-0.1028		-0.1028						PIMA	AMR
PIMA_1060	-0.0402	-0.004		-0.004						-0.1022		-0.1022						PIMA	AMR
SUR_832	-0.0457	-0.0055		-0.0055						-0.1301		-0.1301						SUR	AMR
SUR_837	-0.0458	-0.005		-0.005						-0.1286		-0.1286						SUR	AMR
SUR_838	-0.0461	-0.0055		-0.0055						-0.1265		-0.1265						SUR	AMR
SUR_843	-0.0451	-0.0052		-0.0052						-0.1307		-0.1307						SUR	AMR
SUR_845	-0.0461	-0.0052		-0.0052						-0.1247		-0.1247						SUR	AMR
SUR_846	-0.0466	-0.006		-0.006						-0.1244		-0.1244						SUR	AMR
SUR_849	-0.0457	-0.0051		-0.0051						-0.131		-0.131						SUR	AMR
SUR_852	-0.046	-0.0053		-0.0053						-0.1294		-0.1294						SUR	AMR
BALO_52	0.0128	0.0235			0.0235					0.0016			0.0016					BALO	CSA
BALO_54	0.0138	0.0254			0.0254					0.0017			0.0017					BALO	CSA
BALO_56	0.0084	0.0201			0.0201					0.0038			0.0038					BALO	CSA
BALO_57	0.0185	0.0086			0.0086					-0.0016			-0.0016					BALO	CSA
BALO_58	0.0109	0.0223			0.0223					0.0024			0.0024					BALO	CSA
BALO_60	0.0175	0.0113			0.0113					0.0016			0.0016					BALO	CSA
BALO_62	0.0139	0.0227			0.0227					0.0023			0.0023					BALO	CSA
BALO_64	0.0137	0.024			0.024					0.001			0.001					BALO	CSA
BALO_66	0.0128	0.0236			0.0236					0.0007			0.0007					BALO	CSA
BALO_68	0.009	0.0215			0.0215					0.0034			0.0034					BALO	CSA
BALO_70	0.0021	0.0145			0.0145					0.0051			0.0051					BALO	CSA
BALO_72	0.013	0.0223			0.0223					0.0002			0.0002					BALO	CSA
BALO_74	0.0128	0.0239			0.0239					0.0045			0.0045					BALO	CSA
BALO_76	0.0164	0.0149			0.0149					0.0026			0.0026					BALO	CSA
BALO_78	0.0149	0.0203			0.0203					0.0018			0.0018					BALO	CSA
BALO_80	0.0138	0.0227			0.0227					0.0016			0.0016					BALO	CSA
BALO_82	0.0116	0.0238			0.0238					0.0005			0.0005					BALO	CSA
BALO_86	0.0135	0.0241			0.0241					0.0014			0.0014					BALO	CSA
BALO_88	0.0127	0.023			0.023					0.0007			0.0007					BALO	CSA
BALO_90	0.0114	0.0195			0.0195					0.0033			0.0033					BALO	CSA
BALO_92	0.011	0.0209			0.0209					0.0028			0.0028					BALO	CSA
BALO_94	0.0117	0.0215			0.0215					0.0019			0.0019					BALO	CSA
BALO_96	0.0123	0.0212			0.0212					0.0029			0.0029					BALO	CSA
BALO_98	0.013	0.0198			0.0198					0.0034			0.0034					BALO	CSA
BRAH_1	0.0131	0.0214			0.0214					0.0014			0.0014					BRAH	CSA
BRAH_3	0.013	0.0223			0.0223					0.0029			0.0029					BRAH	CSA
BRAH_5	0.0118	0.0222			0.0222					0.0015			0.0015					BRAH	CSA
BRAH_7	0.0132	0.0231			0.0231					0.0027			0.0027					BRAH	CSA
BRAH_9	0.0135	0.0235			0.0235					0.0027			0.0027					BRAH	CSA
BRAH_11	0.0122	0.0232			0.0232					0.0025			0.0025					BRAH	CSA
BRAH_13	0.0222	-0.0017			-0.0017					0.0025			0.0025					BRAH	CSA
BRAH_15	0.0136	0.0238			0.0238					0.004			0.004					BRAH	CSA
BRAH_17	0.013	0.023			0.023					0.0015			0.0015					BRAH	CSA
BRAH_19	0.0113	0.0218			0.0218					0.0006			0.0006					BRAH	CSA
BRAH_21	0.0149	0.0207			0.0207					0.0024			0.0024					BRAH	CSA
BRAH_23	0.0131	0.0233			0.0233					0.0011			0.0011					BRAH	CSA
BRAH_25	0.0127	0.0237			0.0237					0.001			0.001					BRAH	CSA
BRAH_27	0.0133	0.0208			0.0208					0.0003			0.0003					BRAH	CSA
BRAH_29	0.0162	0.0091			0.0091					0.001			0.001					BRAH	CSA
BRAH_31	0.0121	0.0223			0.0223					0.0014			0.0014					BRAH	CSA
BRAH_33	0.0124	0.0234			0.0234					0.0017			0.0017					BRAH	CSA
BRAH_35	0.0124	0.0209			0.0209					0.0018			0.0018					BRAH	CSA
BRAH_37	0.0125	0.0236			0.0236					0.002			0.002					BRAH	CSA
BRAH_39	0.0115	0.0183			0.0183					0.0024			0.0024					BRAH	CSA
BRAH_41	0.012	0.0239			0.0239					0.0027			0.0027					BRAH	CSA
BRAH_43	0.0139	0.0204			0.0204					0.0012			0.0012					BRAH	CSA
BRAH_45	0.0128	0.0237			0.0237					0.0022			0.0022					BRAH	CSA
BRAH_47	0.0149	0.0192			0.0192					0.0012			0.0012					BRAH	CSA
BRAH_49	0.0134	0.0226			0.0226					0.0018			0.0018					BRAH	CSA
BUR_336	0.0008	0.0153			0.0153					0.0035			0.0035					BUR	CSA
BUR_338	0.0025	0.0163			0.0163					0.0036			0.0036					BUR	CSA
BUR_341	0.0017	0.0171			0.0171					0.0025			0.0025					BUR	CSA
BUR_346	0.0017	0.0173			0.0173					0.0046			0.0046					BUR	CSA
BUR_351	0.0021	0.0167			0.0167					0.0031			0.0031					BUR	CSA
BUR_356	0.002	0.0172			0.0172					0.0042			0.0042					BUR	CSA
BUR_359	0.0023	0.017			0.017					0.0032			0.0032					BUR	CSA
BUR_364	0.0035	0.0177			0.0177					0.0043			0.0043					BUR	CSA
BUR_371	0.0014	0.0155			0.0155					0.003			0.003					BUR	CSA
BUR_372	0.0012	0.0166			0.0166					0.004			0.004					BUR	CSA
BUR_376	0.0001	0.0145			0.0145					0.0045			0.0045					BUR	CSA
BUR_382	0.0012	0.0168			0.0168					0.0024			0.0024					BUR	CSA
BUR_388	0.0026	0.0169			0.0169					0.0037			0.0037					BUR	CSA
BUR_392	0.0014	0.0175			0.0175					0.0024			0.0024					BUR	CSA
BUR_397	0.002	0.0163			0.0163					0.0036			0.0036					BUR	CSA
BUR_402	0.0024	0.017			0.017					0.0026			0.0026					BUR	CSA
BUR_407	0.0006	0.0165			0.0165					0.0041			0.0041					BUR	CSA
BUR_412	0.0022	0.0175			0.0175					0.0028			0.0028					BUR	CSA
BUR_417	0.0025	0.0165			0.0165					0.0015			0.0015					BUR	CSA
BUR_423	0.0027	0.0168			0.0168					0.0036			0.0036					BUR	CSA
BUR_428	0.0034	0.0179			0.0179					0.0043			0.0043					BUR	CSA
BUR_433	0.0041	0.0181			0.0181					0.0024			0.0024					BUR	CSA
BUR_438	0.0024	0.0185			0.0185					0.0031			0.0031					BUR	CSA
BUR_444	0.0027	0.0171			0.0171					0.0019			0.0019					BUR	CSA
BUR_445	0.0017	0.0169			0.0169					0.0028			0.0028					BUR	CSA
HAZ_99	-0.0168	0.0052			0.0052					0.0083			0.0083					HAZ	CSA
HAZ_100	-0.0098	0.0104			0.0104					0.0088			0.0088					HAZ	CSA
HAZ_102	-0.0154	0.0056			0.0056					0.0117			0.0117					HAZ	CSA
HAZ_103	-0.0171	0.0044			0.0044					0.0092			0.0092					HAZ	CSA
HAZ_104	-0.0082	0.0108			0.0108					0.0062			0.0062					HAZ	CSA
HAZ_105	-0.0162	0.0047			0.0047					0.0105			0.0105					HAZ	CSA
HAZ_106	-0.0135	0.0067			0.0067					0.0109			0.0109					HAZ	CSA
HAZ_108	-0.0155	0.0056			0.0056					0.012			0.012					HAZ	CSA
HAZ_109	-0.0155	0.0061			0.0061					0.0093			0.0093					HAZ	CSA
HAZ_110	-0.0135	0.0066			0.0066					0.0099			0.0099					HAZ	CSA
HAZ_112	-0.0188	0.0033			0.0033					0.011			0.011					HAZ	CSA
HAZ_115	-0.0172	0.0049			0.0049					0.0097			0.0097					HAZ	CSA
HAZ_116	-0.0165	0.0048			0.0048					0.0096			0.0096					HAZ	CSA
HAZ_118	-0.0138	0.0059			0.0059					0.0111			0.0111					HAZ	CSA
HAZ_119	-0.0119	0.0089			0.0089					0.0095			0.0095					HAZ	CSA
HAZ_120	-0.0142	0.0068			0.0068					0.0111			0.0111					HAZ	CSA
HAZ_121	-0.016	0.0052			0.0052					0.0137			0.0137					HAZ	CSA
HAZ_122	-0.0166	0.0057			0.0057					0.0126			0.0126					HAZ	CSA
HAZ_124	-0.014	0.0069			0.0069					0.0084			0.0084					HAZ	CSA
HAZ_125	-0.0154	0.0047			0.0047					0.0114			0.0114					HAZ	CSA
HAZ_127	-0.016	0.0056			0.0056					0.01			0.01					HAZ	CSA
HAZ_129	-0.0014	0.0163			0.0163					0.0058			0.0058					HAZ	CSA
KAL_267	0.0099	0.0233			0.0233					0.0012			0.0012					KAL	CSA
KAL_274	0.0092	0.0237			0.0237					0.0003			0.0003					KAL	CSA
KAL_277	0.0095	0.0233			0.0233					-0.001			-0.001					KAL	CSA
KAL_279	0.0083	0.0227			0.0227					-0.0006			-0.0006					KAL	CSA
KAL_281	0.009	0.0237			0.0237					0.0009			0.0009					KAL	CSA
KAL_285	0.01	0.024			0.024					0.0011			0.0011					KAL	CSA
KAL_286	0.0097	0.0232			0.0232					-0.0002			-0.0002					KAL	CSA
KAL_288	0.0095	0.0233			0.0233					0.0007			0.0007					KAL	CSA
KAL_290	0.0088	0.023			0.023					-0.0007			-0.0007					KAL	CSA
KAL_298	0.0092	0.0229			0.0229					0.0008			0.0008					KAL	CSA
KAL_302	0.0088	0.0232			0.0232					0.0005			0.0005					KAL	CSA
KAL_304	0.0092	0.0237			0.0237					0.0001			0.0001					KAL	CSA
KAL_307	0.0091	0.0235			0.0235					-0.0012			-0.0012					KAL	CSA
KAL_309	0.009	0.0231			0.0231					0			0					KAL	CSA
KAL_311	0.0087	0.0231			0.0231					0.0008			0.0008					KAL	CSA
KAL_313	0.0092	0.0231			0.0231					0.0004			0.0004					KAL	CSA
KAL_315	0.0089	0.024			0.024					0.0019			0.0019					KAL	CSA
KAL_319	0.0095	0.0236			0.0236					0.0008			0.0008					KAL	CSA
KAL_323	0.0102	0.0245			0.0245					-0.0004			-0.0004					KAL	CSA
KAL_326	0.009	0.0237			0.0237					0.0013			0.0013					KAL	CSA
KAL_328	0.0091	0.0237			0.0237					-0.0014			-0.0014					KAL	CSA
KAL_330	0.0095	0.0236			0.0236					0.0003			0.0003					KAL	CSA
KAL_333	0.0101	0.0239			0.0239					0.0002			0.0002					KAL	CSA
MAK_130	0.0255	-0.0165			-0.0165					-0.0025			-0.0025					MAK	CSA
MAK_131	0.0151	0.0226			0.0226					0.0012			0.0012					MAK	CSA
MAK_133	0.0142	0.023			0.023					0.0024			0.0024					MAK	CSA
MAK_134	0.0164	0.0182			0.0182					0.0028			0.0028					MAK	CSA
MAK_135	0.0141	0.0243			0.0243					0.0017			0.0017					MAK	CSA
MAK_136	0.0144	0.0197			0.0197					0.0019			0.0019					MAK	CSA
MAK_137	0.0145	0.0223			0.0223					0.0021			0.0021					MAK	CSA
MAK_139	0.0188	0.0122			0.0122					0.0001			0.0001					MAK	CSA
MAK_140	0.0144	0.0183			0.0183					0.0018			0.0018					MAK	CSA
MAK_141	0.0152	0.0194			0.0194					0.0021			0.0021					MAK	CSA
MAK_143	0.01	0.016			0.016					0.0017			0.0017					MAK	CSA
MAK_144	0.0153	0.0215			0.0215					0.0031			0.0031					MAK	CSA
MAK_145	0.0152	0.0194			0.0194					0.0012			0.0012					MAK	CSA
MAK_146	0.0162	0.0232			0.0232					0.0011			0.0011					MAK	CSA
MAK_148	0.0147	0.0208			0.0208					0.001			0.001					MAK	CSA
MAK_149	0.0114	0.0131			0.0131					0.0038			0.0038					MAK	CSA
MAK_150	0.0199	0.0035			0.0035					0.0013			0.0013					MAK	CSA
MAK_151	0.0153	0.0191			0.0191					0.0015			0.0015					MAK	CSA
MAK_153	0.017	0.0177			0.0177					0.0037			0.0037					MAK	CSA
MAK_154	0.0156	0.0221			0.0221					0.0004			0.0004					MAK	CSA
MAK_155	0.0151	0.0237			0.0237					0.0014			0.0014					MAK	CSA
MAK_157	0.0158	0.0211			0.0211					0.0026			0.0026					MAK	CSA
MAK_158	0.0133	0.0229			0.0229					0			0					MAK	CSA
MAK_160	0.014	0.0222			0.0222					0.0027			0.0027					MAK	CSA
MAK_161	0.0155	0.0203			0.0203					0.0016			0.0016					MAK	CSA
PATH_213	0.0096	0.023			0.023					0.001			0.001					PATH	CSA
PATH_214	0.0101	0.022			0.022					0.002			0.002					PATH	CSA
PATH_216	0.0076	0.0214			0.0214					0.0012			0.0012					PATH	CSA
PATH_218	0.0091	0.0218			0.0218					0.0013			0.0013					PATH	CSA
PATH_222	0.008	0.0207			0.0207					0.0005			0.0005					PATH	CSA
PATH_224	0.0084	0.0222			0.0222					0.0004			0.0004					PATH	CSA
PATH_226	0.0082	0.0215			0.0215					0.001			0.001					PATH	CSA
PATH_228	0.0076	0.0202			0.0202					0.0017			0.0017					PATH	CSA
PATH_230	0.0075	0.021			0.021					0.0008			0.0008					PATH	CSA
PATH_232	0.0081	0.0208			0.0208					-0.0001			-0.0001					PATH	CSA
PATH_234	0.0067	0.022			0.022					0.0014			0.0014					PATH	CSA
PATH_237	0.0055	0.0175			0.0175					0.0049			0.0049					PATH	CSA
PATH_239	0.0052	0.017			0.017					0.0042			0.0042					PATH	CSA
PATH_241	0.0094	0.023			0.023					0.0018			0.0018					PATH	CSA
PATH_243	0.0106	0.0234			0.0234					0			0					PATH	CSA
PATH_244	0.0077	0.0203			0.0203					0.0004			0.0004					PATH	CSA
PATH_251	0.0084	0.0199			0.0199					0.0028			0.0028					PATH	CSA
PATH_254	0.009	0.0218			0.0218					0.0019			0.0019					PATH	CSA
PATH_258	0.0063	0.0189			0.0189					0.0027			0.0027					PATH	CSA
PATH_259	0.0097	0.0224			0.0224					0.0004			0.0004					PATH	CSA
PATH_262	0.0088	0.0219			0.0219					0.0029			0.0029					PATH	CSA
PATH_264	0.0073	0.02			0.02					0.0008			0.0008					PATH	CSA
SIND_163	0.0108	0.0152			0.0152					0.0023			0.0023					SIND	CSA
SIND_165	0.0087	0.0155			0.0155					0.0031			0.0031					SIND	CSA
SIND_167	0.0078	0.0182			0.0182					0.0041			0.0041					SIND	CSA
SIND_169	0.007	0.0186			0.0186					0.003			0.003					SIND	CSA
SIND_171	0.0078	0.0202			0.0202					0.0014			0.0014					SIND	CSA
SIND_173	0.0136	0.0073			0.0073					0.0009			0.0009					SIND	CSA
SIND_175	0.0251	-0.0208			-0.0208					-0.001			-0.001					SIND	CSA
SIND_177	0.0111	0.0107			0.0107					0.0033			0.0033					SIND	CSA
SIND_179	0.0087	0.0191			0.0191					0.0018			0.0018					SIND	CSA
SIND_181	0.0072	0.0199			0.0199					0.0028			0.0028					SIND	CSA
SIND_183	0.0071	0.0187			0.0187					0.0025			0.0025					SIND	CSA
SIND_185	0.0085	0.0198			0.0198					0.0024			0.0024					SIND	CSA
SIND_187	0.0074	0.0197			0.0197					0.003			0.003					SIND	CSA
SIND_189	0.0076	0.0202			0.0202					0.0027			0.0027					SIND	CSA
SIND_191	0.0076	0.021			0.021					0.0029			0.0029					SIND	CSA
SIND_192	0.0073	0.0187			0.0187					0.0025			0.0025					SIND	CSA
SIND_195	0.0059	0.018			0.018					0.0025			0.0025					SIND	CSA
SIND_197	0.0068	0.0201			0.0201					0.0011			0.0011					SIND	CSA
SIND_199	0.0122	0.0221			0.0221					0.0022			0.0022					SIND	CSA
SIND_201	0.008	0.0194			0.0194					0.0011			0.0011					SIND	CSA
SIND_205	0.008	0.0197			0.0197					0.0038			0.0038					SIND	CSA
SIND_206	0.0053	0.0178			0.0178					0.0039			0.0039					SIND	CSA
SIND_208	0.0071	0.0198			0.0198					0.0029			0.0029					SIND	CSA
SIND_210	0.0073	0.0187			0.0187					0.002			0.002					SIND	CSA
UYG_1297	-0.0129	0.0077			0.0077					0.0088			0.0088					UYG	CSA
UYG_1298	-0.0106	0.0095			0.0095					0.0097			0.0097					UYG	CSA
UYG_1299	-0.0157	0.0074			0.0074					0.0096			0.0096					UYG	CSA
UYG_1300	-0.0134	0.0088			0.0088					0.0064			0.0064					UYG	CSA
UYG_1301	-0.0148	0.0056			0.0056					0.0088			0.0088					UYG	CSA
UYG_1302	-0.0232	0.0017			0.0017					0.011			0.011					UYG	CSA
UYG_1303	-0.0121	0.0084			0.0084					0.0098			0.0098					UYG	CSA
UYG_1304	-0.0188	0.0039			0.0039					0.0122			0.0122					UYG	CSA
UYG_1305	-0.0184	0.0035			0.0035					0.0103			0.0103					UYG	CSA
UYG_1306	-0.0159	0.0052			0.0052					0.0097			0.0097					UYG	CSA
CAMB_711	-0.0365	-0.014				-0.014				0.0274				0.0274				CAMB	EAS
CAMB_712	-0.044	-0.017				-0.017				0.0304				0.0304				CAMB	EAS
CAMB_713	-0.0358	-0.0133				-0.0133				0.0286				0.0286				CAMB	EAS
CAMB_714	-0.0396	-0.015				-0.015				0.0285				0.0285				CAMB	EAS
CAMB_715	-0.0338	-0.0124				-0.0124				0.0261				0.0261				CAMB	EAS
CAMB_716	-0.0407	-0.0166				-0.0166				0.0278				0.0278				CAMB	EAS
CAMB_717	-0.0372	-0.0149				-0.0149				0.0273				0.0273				CAMB	EAS
CAMB_719	-0.0392	-0.0153				-0.0153				0.029				0.029				CAMB	EAS
CAMB_720	-0.0366	-0.0133				-0.0133				0.0279				0.0279				CAMB	EAS
CAMB_721	-0.0351	-0.0139				-0.0139				0.027				0.027				CAMB	EAS
DAI_1307	-0.045	-0.0181				-0.0181				0.0311				0.0311				DAI	EAS
DAI_1308	-0.044	-0.0166				-0.0166				0.0319				0.0319				DAI	EAS
DAI_1309	-0.045	-0.0182				-0.0182				0.0314				0.0314				DAI	EAS
DAI_1310	-0.044	-0.0179				-0.0179				0.0327				0.0327				DAI	EAS
DAI_1311	-0.045	-0.018				-0.018				0.0324				0.0324				DAI	EAS
DAI_1312	-0.0447	-0.0184				-0.0184				0.0296				0.0296				DAI	EAS
DAI_1313	-0.0448	-0.0176				-0.0176				0.0318				0.0318				DAI	EAS
DAI_1314	-0.0449	-0.0183				-0.0183				0.0309				0.0309				DAI	EAS
DAI_1315	-0.0447	-0.0179				-0.0179				0.0312				0.0312				DAI	EAS
DAI_1316	-0.045	-0.0177				-0.0177				0.0308				0.0308				DAI	EAS
DAUR_1213	-0.0449	-0.0155				-0.0155				0.023				0.023				DAUR	EAS
DAUR_1214	-0.0429	-0.0137				-0.0137				0.0214				0.0214				DAUR	EAS
DAUR_1215	-0.0436	-0.0148				-0.0148				0.0229				0.0229				DAUR	EAS
DAUR_1216	-0.0436	-0.0146				-0.0146				0.0199				0.0199				DAUR	EAS
DAUR_1217	-0.0438	-0.0139				-0.0139				0.0226				0.0226				DAUR	EAS
DAUR_1218	-0.0441	-0.016				-0.016				0.0219				0.0219				DAUR	EAS
DAUR_1220	-0.0449	-0.0154				-0.0154				0.0203				0.0203				DAUR	EAS
DAUR_1221	-0.0445	-0.0152				-0.0152				0.0216				0.0216				DAUR	EAS
DAUR_1222	-0.0442	-0.0152				-0.0152				0.023				0.023				DAUR	EAS
HAN_774	-0.0484	-0.0189				-0.0189				0.0305				0.0305				HAN	EAS
HAN_775	-0.047	-0.0184				-0.0184				0.0315				0.0315				HAN	EAS
HAN_776	-0.0468	-0.0183				-0.0183				0.0289				0.0289				HAN	EAS
HAN_777	-0.0458	-0.0164				-0.0164				0.0271				0.0271				HAN	EAS
HAN_778	-0.0469	-0.0179				-0.0179				0.0291				0.0291				HAN	EAS
HAN_779	-0.0472	-0.0181				-0.0181				0.0298				0.0298				HAN	EAS
HAN_780	-0.0455	-0.0182				-0.0182				0.0296				0.0296				HAN	EAS
HAN_781	-0.0459	-0.0193				-0.0193				0.0302				0.0302				HAN	EAS
HAN_782	-0.0471	-0.018				-0.018				0.0282				0.0282				HAN	EAS
HAN_783	-0.0472	-0.0171				-0.0171				0.0277				0.0277				HAN	EAS
HAN_784	-0.0454	-0.0172				-0.0172				0.0306				0.0306				HAN	EAS
HAN_785	-0.0473	-0.0176				-0.0176				0.0316				0.0316				HAN	EAS
HAN_786	-0.0482	-0.0188				-0.0188				0.0294				0.0294				HAN	EAS
HAN_811	-0.0481	-0.0189				-0.0189				0.0321				0.0321				HAN	EAS
HAN_812	-0.0459	-0.0186				-0.0186				0.0316				0.0316				HAN	EAS
HAN_813	-0.0482	-0.0196				-0.0196				0.0298				0.0298				HAN	EAS
HAN_814	-0.0468	-0.018				-0.018				0.0296				0.0296				HAN	EAS
HAN_815	-0.0475	-0.0181				-0.0181				0.0303				0.0303				HAN	EAS
HAN_817	-0.0466	-0.0181				-0.0181				0.0311				0.0311				HAN	EAS
HAN_818	-0.0478	-0.0192				-0.0192				0.0324				0.0324				HAN	EAS
HAN_819	-0.0471	-0.0183				-0.0183				0.0311				0.0311				HAN	EAS
HAN_820	-0.0471	-0.0178				-0.0178				0.0302				0.0302				HAN	EAS
HAN_821	-0.0466	-0.0184				-0.0184				0.0307				0.0307				HAN	EAS
HAN_822	-0.0472	-0.0185				-0.0185				0.0313				0.0313				HAN	EAS
HAN_971	-0.0466	-0.0174				-0.0174				0.031				0.031				HAN	EAS
HAN_972	-0.048	-0.0179				-0.0179				0.0299				0.0299				HAN	EAS
HAN_973	-0.0481	-0.0188				-0.0188				0.0301				0.0301				HAN	EAS
HAN_974	-0.0463	-0.0177				-0.0177				0.0298				0.0298				HAN	EAS
HAN_975	-0.0466	-0.0186				-0.0186				0.031				0.031				HAN	EAS
HAN_976	-0.0474	-0.018				-0.018				0.029				0.029				HAN	EAS
HAN_977	-0.0476	-0.0185				-0.0185				0.0301				0.0301				HAN	EAS
HAN_1021	-0.0478	-0.0184				-0.0184				0.0311				0.0311				HAN	EAS
HAN_1023	-0.0467	-0.0176				-0.0176				0.0292				0.0292				HAN	EAS
HAN_1024	-0.0461	-0.0162				-0.0162				0.0301				0.0301				HAN	EAS
HEZ_1234	-0.0448	-0.0156				-0.0156				0.0198				0.0198				HEZ	EAS
HEZ_1236	-0.0466	-0.0169				-0.0169				0.0227				0.0227				HEZ	EAS
HEZ_1237	-0.0453	-0.016				-0.016				0.0186				0.0186				HEZ	EAS
HEZ_1238	-0.044	-0.0149				-0.0149				0.023				0.023				HEZ	EAS
HEZ_1239	-0.0451	-0.0153				-0.0153				0.0225				0.0225				HEZ	EAS
HEZ_1240	-0.0449	-0.0153				-0.0153				0.0188				0.0188				HEZ	EAS
HEZ_1241	-0.0452	-0.0158				-0.0158				0.0233				0.0233				HEZ	EAS
HEZ_1242	-0.0455	-0.0161				-0.0161				0.0212				0.0212				HEZ	EAS
JAP_747	-0.0471	-0.0179				-0.0179				0.0269				0.0269				JAP	EAS
JAP_748	-0.0473	-0.0176				-0.0176				0.0261				0.0261				JAP	EAS
JAP_749	-0.0466	-0.018				-0.018				0.0257				0.0257				JAP	EAS
JAP_750	-0.047	-0.0176				-0.0176				0.0259				0.0259				JAP	EAS
JAP_751	-0.046	-0.0166				-0.0166				0.0259				0.0259				JAP	EAS
JAP_752	-0.0467	-0.0179				-0.0179				0.0278				0.0278				JAP	EAS
JAP_753	-0.0463	-0.0179				-0.0179				0.0262				0.0262				JAP	EAS
JAP_755	-0.0471	-0.0174				-0.0174				0.0256				0.0256				JAP	EAS
JAP_756	-0.0457	-0.0171				-0.0171				0.0258				0.0258				JAP	EAS
JAP_757	-0.0457	-0.017				-0.017				0.0265				0.0265				JAP	EAS
JAP_758	-0.0469	-0.0169				-0.0169				0.0255				0.0255				JAP	EAS
JAP_759	-0.0478	-0.0187				-0.0187				0.0266				0.0266				JAP	EAS
JAP_760	-0.0473	-0.0181				-0.0181				0.0263				0.0263				JAP	EAS
JAP_761	-0.0467	-0.0169				-0.0169				0.0278				0.0278				JAP	EAS
JAP_762	-0.0466	-0.0183				-0.0183				0.0237				0.0237				JAP	EAS
JAP_763	-0.0471	-0.0178				-0.0178				0.0268				0.0268				JAP	EAS
JAP_764	-0.0465	-0.0176				-0.0176				0.0276				0.0276				JAP	EAS
JAP_765	-0.0466	-0.0181				-0.0181				0.026				0.026				JAP	EAS
JAP_766	-0.0467	-0.0168				-0.0168				0.0265				0.0265				JAP	EAS
JAP_767	-0.0464	-0.0175				-0.0175				0.0243				0.0243				JAP	EAS
JAP_768	-0.047	-0.0183				-0.0183				0.0267				0.0267				JAP	EAS
JAP_769	-0.0477	-0.0171				-0.0171				0.0259				0.0259				JAP	EAS
JAP_771	-0.0468	-0.0175				-0.0175				0.0264				0.0264				JAP	EAS
JAP_772	-0.0469	-0.0173				-0.0173				0.0265				0.0265				JAP	EAS
JAP_773	-0.0461	-0.0173				-0.0173				0.0269				0.0269				JAP	EAS
JAP_790	-0.0465	-0.0175				-0.0175				0.0262				0.0262				JAP	EAS
JAP_791	-0.0458	-0.0175				-0.0175				0.026				0.026				JAP	EAS
JAP_828	-0.046	-0.0181				-0.0181				0.0266				0.0266				JAP	EAS
LAHU_1317	-0.0453	-0.0183				-0.0183				0.031				0.031				LAHU	EAS
LAHU_1318	-0.0443	-0.0177				-0.0177				0.029				0.029				LAHU	EAS
LAHU_1319	-0.0442	-0.0165				-0.0165				0.0291				0.0291				LAHU	EAS
LAHU_1320	-0.044	-0.0176				-0.0176				0.0307				0.0307				LAHU	EAS
LAHU_1321	-0.0443	-0.0175				-0.0175				0.0298				0.0298				LAHU	EAS
LAHU_1322	-0.0435	-0.017				-0.017				0.0317				0.0317				LAHU	EAS
LAHU_1323	-0.0437	-0.0178				-0.0178				0.031				0.031				LAHU	EAS
LAHU_1326	-0.045	-0.0176				-0.0176				0.0287				0.0287				LAHU	EAS
MIA_1189	-0.0459	-0.0179				-0.0179				0.0312				0.0312				MIA	EAS
MIA_1190	-0.0461	-0.0181				-0.0181				0.0304				0.0304				MIA	EAS
MIA_1191	-0.047	-0.0181				-0.0181				0.03				0.03				MIA	EAS
MIA_1192	-0.0473	-0.0186				-0.0186				0.031				0.031				MIA	EAS
MIA_1193	-0.0468	-0.0185				-0.0185				0.0306				0.0306				MIA	EAS
MIA_1194	-0.0462	-0.018				-0.018				0.0301				0.0301				MIA	EAS
MIA_1195	-0.0469	-0.0174				-0.0174				0.0287				0.0287				MIA	EAS
MIA_1196	-0.0469	-0.0185				-0.0185				0.031				0.031				MIA	EAS
MIA_1197	-0.0468	-0.0181				-0.0181				0.0314				0.0314				MIA	EAS
MIA_1198	-0.0467	-0.0177				-0.0177				0.0295				0.0295				MIA	EAS
MONG_1223	-0.0432	-0.0142				-0.0142				0.023				0.023				MONG	EAS
MONG_1224	-0.044	-0.0152				-0.0152				0.0244				0.0244				MONG	EAS
MONG_1225	-0.0446	-0.0151				-0.0151				0.0248				0.0248				MONG	EAS
MONG_1226	-0.0379	-0.0096				-0.0096				0.016				0.016				MONG	EAS
MONG_1227	-0.0426	-0.0137				-0.0137				0.024				0.024				MONG	EAS
MONG_1228	-0.0437	-0.0142				-0.0142				0.0221				0.0221				MONG	EAS
MONG_1229	-0.038	-0.0098				-0.0098				0.0165				0.0165				MONG	EAS
MONG_1230	-0.0392	-0.0105				-0.0105				0.0172				0.0172				MONG	EAS
MONG_1231	-0.0443	-0.016				-0.016				0.0249				0.0249				MONG	EAS
MONG_1232	-0.0432	-0.016				-0.016				0.0231				0.0231				MONG	EAS
NAXI_1337	-0.045	-0.0168				-0.0168				0.0282				0.0282				NAXI	EAS
NAXI_1338	-0.0451	-0.0173				-0.0173				0.0291				0.0291				NAXI	EAS
NAXI_1339	-0.045	-0.0176				-0.0176				0.0288				0.0288				NAXI	EAS
NAXI_1340	-0.0447	-0.0166				-0.0166				0.0277				0.0277				NAXI	EAS
NAXI_1341	-0.0444	-0.0168				-0.0168				0.0275				0.0275				NAXI	EAS
NAXI_1342	-0.0451	-0.0176				-0.0176				0.0289				0.0289				NAXI	EAS
NAXI_1345	-0.0452	-0.0176				-0.0176				0.029				0.029				NAXI	EAS
NAXI_1346	-0.0444	-0.0181				-0.0181				0.0278				0.0278				NAXI	EAS
NHAN_1287	-0.0454	-0.0173				-0.0173				0.0266				0.0266				NHAN	EAS
NHAN_1288	-0.0459	-0.0162				-0.0162				0.0269				0.0269				NHAN	EAS
NHAN_1289	-0.0463	-0.0158				-0.0158				0.0271				0.0271				NHAN	EAS
NHAN_1290	-0.0455	-0.0162				-0.0162				0.0255				0.0255				NHAN	EAS
NHAN_1291	-0.0454	-0.0163				-0.0163				0.0292				0.0292				NHAN	EAS
NHAN_1292	-0.0468	-0.0168				-0.0168				0.0282				0.0282				NHAN	EAS
NHAN_1293	-0.0451	-0.017				-0.017				0.0277				0.0277				NHAN	EAS
NHAN_1294	-0.0451	-0.0169				-0.0169				0.0302				0.0302				NHAN	EAS
NHAN_1295	-0.0451	-0.0169				-0.0169				0.0268				0.0268				NHAN	EAS
NHAN_1296	-0.0448	-0.0166				-0.0166				0.0276				0.0276				NHAN	EAS
ORQ_1203	-0.045	-0.0151				-0.0151				0.017				0.017				ORQ	EAS
ORQ_1204	-0.045	-0.0163				-0.0163				0.0241				0.0241				ORQ	EAS
ORQ_1205	-0.044	-0.0146				-0.0146				0.0205				0.0205				ORQ	EAS
ORQ_1206	-0.0443	-0.014				-0.014				0.0168				0.0168				ORQ	EAS
ORQ_1207	-0.0437	-0.014				-0.014				0.0192				0.0192				ORQ	EAS
ORQ_1208	-0.0452	-0.0152				-0.0152				0.0195				0.0195				ORQ	EAS
ORQ_1209	-0.0453	-0.0142				-0.0142				0.0197				0.0197				ORQ	EAS
ORQ_1211	-0.0446	-0.0143				-0.0143				0.0148				0.0148				ORQ	EAS
ORQ_1212	-0.0437	-0.0143				-0.0143				0.0219				0.0219				ORQ	EAS
SHE_1327	-0.0469	-0.018				-0.018				0.0314				0.0314				SHE	EAS
SHE_1328	-0.0472	-0.0187				-0.0187				0.0318				0.0318				SHE	EAS
SHE_1329	-0.047	-0.0187				-0.0187				0.0308				0.0308				SHE	EAS
SHE_1330	-0.0474	-0.019				-0.019				0.0319				0.0319				SHE	EAS
SHE_1331	-0.0478	-0.0186				-0.0186				0.0303				0.0303				SHE	EAS
SHE_1332	-0.0468	-0.0182				-0.0182				0.0308				0.0308				SHE	EAS
SHE_1333	-0.0468	-0.0175				-0.0175				0.0289				0.0289				SHE	EAS
SHE_1334	-0.0463	-0.019				-0.019				0.0308				0.0308				SHE	EAS
SHE_1335	-0.0471	-0.0186				-0.0186				0.0298				0.0298				SHE	EAS
SHE_1336	-0.0462	-0.0186				-0.0186				0.0304				0.0304				SHE	EAS
TU_1347	-0.0418	-0.0147				-0.0147				0.0245				0.0245				TU	EAS
TU_1348	-0.0406	-0.0142				-0.0142				0.0235				0.0235				TU	EAS
TU_1349	-0.0426	-0.0148				-0.0148				0.0259				0.0259				TU	EAS
TU_1350	-0.0399	-0.0131				-0.0131				0.0244				0.0244				TU	EAS
TU_1351	-0.0417	-0.0139				-0.0139				0.0248				0.0248				TU	EAS
TU_1352	-0.0426	-0.0147				-0.0147				0.0248				0.0248				TU	EAS
TU_1353	-0.04	-0.0123				-0.0123				0.0226				0.0226				TU	EAS
TU_1354	-0.0425	-0.0152				-0.0152				0.0254				0.0254				TU	EAS
TU_1355	-0.0418	-0.0155				-0.0155				0.0245				0.0245				TU	EAS
TU_1356	-0.0409	-0.0139				-0.0139				0.0242				0.0242				TU	EAS
TUJ_1095	-0.0468	-0.0186				-0.0186				0.03				0.03				TUJ	EAS
TUJ_1096	-0.0473	-0.0183				-0.0183				0.0283				0.0283				TUJ	EAS
TUJ_1097	-0.0464	-0.0184				-0.0184				0.031				0.031				TUJ	EAS
TUJ_1098	-0.0464	-0.0179				-0.0179				0.0303				0.0303				TUJ	EAS
TUJ_1099	-0.0467	-0.0181				-0.0181				0.0285				0.0285				TUJ	EAS
TUJ_1100	-0.0462	-0.0184				-0.0184				0.0302				0.0302				TUJ	EAS
TUJ_1101	-0.0466	-0.0185				-0.0185				0.0303				0.0303				TUJ	EAS
TUJ_1102	-0.047	-0.0197				-0.0197				0.0293				0.0293				TUJ	EAS
TUJ_1103	-0.0474	-0.018				-0.018				0.03				0.03				TUJ	EAS
TUJ_1104	-0.0473	-0.0178				-0.0178				0.0308				0.0308				TUJ	EAS
XIB_1243	-0.0318	-0.0058				-0.0058				0.0187				0.0187				XIB	EAS
XIB_1244	-0.044	-0.0154				-0.0154				0.0247				0.0247				XIB	EAS
XIB_1245	-0.045	-0.0154				-0.0154				0.0251				0.0251				XIB	EAS
XIB_1246	-0.0451	-0.0163				-0.0163				0.0241				0.0241				XIB	EAS
XIB_1247	-0.0389	-0.011				-0.011				0.0225				0.0225				XIB	EAS
XIB_1248	-0.0419	-0.0143				-0.0143				0.0235				0.0235				XIB	EAS
XIB_1249	-0.044	-0.0146				-0.0146				0.0237				0.0237				XIB	EAS
XIB_1250	-0.0428	-0.0147				-0.0147				0.0239				0.0239				XIB	EAS
XIB_1251	-0.0448	-0.0156				-0.0156				0.0242				0.0242				XIB	EAS
YAK_945	-0.0391	-0.0095				-0.0095				0.0127				0.0127				YAK	EAS
YAK_946	-0.0385	-0.0103				-0.0103				0.0148				0.0148				YAK	EAS
YAK_947	-0.037	-0.0082				-0.0082				0.0121				0.0121				YAK	EAS
YAK_948	-0.0351	-0.0069				-0.0069				0.0117				0.0117				YAK	EAS
YAK_949	-0.025	0.0011				0.0011				0.0085				0.0085				YAK	EAS
YAK_950	-0.034	-0.0058				-0.0058				0.0122				0.0122				YAK	EAS
YAK_951	-0.0387	-0.0097				-0.0097				0.0117				0.0117				YAK	EAS
YAK_952	-0.0384	-0.0092				-0.0092				0.012				0.012				YAK	EAS
YAK_953	-0.0235	0.0012				0.0012				0.0059				0.0059				YAK	EAS
YAK_954	-0.0388	-0.0101				-0.0101				0.0133				0.0133				YAK	EAS
YAK_955	-0.0388	-0.01				-0.01				0.0129				0.0129				YAK	EAS
YAK_956	-0.0388	-0.0105				-0.0105				0.0139				0.0139				YAK	EAS
YAK_957	-0.0397	-0.0107				-0.0107				0.0136				0.0136				YAK	EAS
YAK_958	-0.0353	-0.0078				-0.0078				0.0125				0.0125				YAK	EAS
YAK_959	-0.0443	-0.0144				-0.0144				0.0107				0.0107				YAK	EAS
YAK_960	-0.0396	-0.01				-0.01				0.0127				0.0127				YAK	EAS
YAK_961	-0.0387	-0.0099				-0.0099				0.014				0.014				YAK	EAS
YAK_962	-0.0398	-0.0106				-0.0106				0.0115				0.0115				YAK	EAS
YAK_963	-0.0394	-0.0107				-0.0107				0.0134				0.0134				YAK	EAS
YAK_964	-0.0375	-0.0093				-0.0093				0.0124				0.0124				YAK	EAS
YAK_965	-0.0389	-0.0103				-0.0103				0.0133				0.0133				YAK	EAS
YAK_966	-0.0364	-0.0075				-0.0075				0.0127				0.0127				YAK	EAS
YAK_967	-0.0384	-0.0096				-0.0096				0.0117				0.0117				YAK	EAS
YAK_968	-0.0353	-0.0075				-0.0075				0.0107				0.0107				YAK	EAS
YAK_969	-0.0295	-0.0024				-0.0024				0.0106				0.0106				YAK	EAS
YI_1179	-0.0452	-0.0173				-0.0173				0.0281				0.0281				YI	EAS
YI_1180	-0.0461	-0.0178				-0.0178				0.0273				0.0273				YI	EAS
YI_1181	-0.0449	-0.0173				-0.0173				0.0273				0.0273				YI	EAS
YI_1182	-0.0443	-0.0167				-0.0167				0.026				0.026				YI	EAS
YI_1183	-0.0442	-0.0179				-0.0179				0.0266				0.0266				YI	EAS
YI_1184	-0.0446	-0.0162				-0.0162				0.0262				0.0262				YI	EAS
YI_1185	-0.0455	-0.0163				-0.0163				0.0286				0.0286				YI	EAS
YI_1186	-0.0447	-0.0176				-0.0176				0.0274				0.0274				YI	EAS
YI_1187	-0.0464	-0.0179				-0.0179				0.0301				0.0301				YI	EAS
YI_1188	-0.0458	-0.0176				-0.0176				0.0279				0.0279				YI	EAS
ADY_1381	0.0132	0.0289					0.0289			0.0013					0.0013			ADY	EUR
ADY_1382	0.0175	0.0312					0.0312			-0.0002					-0.0002			ADY	EUR
ADY_1383	0.0169	0.0303					0.0303			0.0009					0.0009			ADY	EUR
ADY_1384	0.0119	0.027					0.027			0.0026					0.0026			ADY	EUR
ADY_1385	0.0153	0.0298					0.0298			0.002					0.002			ADY	EUR
ADY_1386	0.0164	0.0292					0.0292			0					0			ADY	EUR
ADY_1387	0.0166	0.0305					0.0305			0.0011					0.0011			ADY	EUR
ADY_1388	0.0116	0.029					0.029			-0.0008					-0.0008			ADY	EUR
ADY_1396	0.0134	0.029					0.029			0.001					0.001			ADY	EUR
ADY_1397	0.0134	0.0287					0.0287			0.0018					0.0018			ADY	EUR
ADY_1398	0.017	0.0308					0.0308			0.0022					0.0022			ADY	EUR
ADY_1399	0.0169	0.0305					0.0305			0.0007					0.0007			ADY	EUR
ADY_1400	0.0162	0.0298					0.0298			0.0025					0.0025			ADY	EUR
ADY_1401	0.016	0.0298					0.0298			0.0018					0.0018			ADY	EUR
ADY_1402	0.0154	0.0314					0.0314			0.0013					0.0013			ADY	EUR
ADY_1403	0.0176	0.031					0.031			-0.0007					-0.0007			ADY	EUR
ADY_1404	0.0134	0.0272					0.0272			0.0012					0.0012			ADY	EUR
BAS_1357	0.0218	0.0346					0.0346			0.0001					0.0001			BAS	EUR
BAS_1358	0.0204	0.0353					0.0353			-0.0004					-0.0004			BAS	EUR
BAS_1359	0.0212	0.0347					0.0347			0.0013					0.0013			BAS	EUR
BAS_1360	0.0197	0.0353					0.0353			-0.0005					-0.0005			BAS	EUR
BAS_1361	0.0201	0.0343					0.0343			0.0012					0.0012			BAS	EUR
BAS_1362	0.021	0.0346					0.0346			0.0003					0.0003			BAS	EUR
BAS_1363	0.0206	0.035					0.035			-0.0002					-0.0002			BAS	EUR
BAS_1364	0.0207	0.0351					0.0351			0.0007					0.0007			BAS	EUR
BAS_1365	0.0212	0.0357					0.0357			0.0011					0.0011			BAS	EUR
BAS_1366	0.0197	0.0357					0.0357			0.0008					0.0008			BAS	EUR
BAS_1367	0.0204	0.0344					0.0344			-0.0023					-0.0023			BAS	EUR
BAS_1368	0.0202	0.0356					0.0356			0.0013					0.0013			BAS	EUR
BAS_1369	0.0207	0.0351					0.0351			-0.0007					-0.0007			BAS	EUR
BAS_1370	0.0195	0.036					0.036			-0.0008					-0.0008			BAS	EUR
BAS_1371	0.0192	0.0348					0.0348			0.0009					0.0009			BAS	EUR
BAS_1372	0.02	0.0356					0.0356			0.001					0.001			BAS	EUR
BAS_1373	0.0199	0.0355					0.0355			0					0			BAS	EUR
BAS_1374	0.02	0.0353					0.0353			0					0			BAS	EUR
BAS_1375	0.0206	0.0348					0.0348			0.0009					0.0009			BAS	EUR
BAS_1376	0.0214	0.0359					0.0359			-0.0006					-0.0006			BAS	EUR
BAS_1377	0.0212	0.0361					0.0361			0.0002					0.0002			BAS	EUR
BAS_1378	0.0215	0.0362					0.0362			-0.0001					-0.0001			BAS	EUR
BAS_1379	0.0202	0.0354					0.0354			-0.0004					-0.0004			BAS	EUR
BAS_1380	0.0211	0.0352					0.0352			0.0013					0.0013			BAS	EUR
FRE_511	0.0191	0.0346					0.0346			-0.0027					-0.0027			FRE	EUR
FRE_512	0.019	0.034					0.034			-0.0019					-0.0019			FRE	EUR
FRE_513	0.0187	0.0328					0.0328			-0.0009					-0.0009			FRE	EUR
FRE_514	0.019	0.033					0.033			-0.0009					-0.0009			FRE	EUR
FRE_515	0.019	0.0343					0.0343			-0.0013					-0.0013			FRE	EUR
FRE_516	0.0192	0.0342					0.0342			-0.0003					-0.0003			FRE	EUR
FRE_517	0.0191	0.0333					0.0333			-0.0007					-0.0007			FRE	EUR
FRE_518	0.0196	0.0336					0.0336			-0.0002					-0.0002			FRE	EUR
FRE_519	0.0188	0.0335					0.0335			-0.0031					-0.0031			FRE	EUR
FRE_520	0.02	0.0323					0.0323			0.0006					0.0006			FRE	EUR
FRE_521	0.0197	0.034					0.034			0.0007					0.0007			FRE	EUR
FRE_522	0.0191	0.0345					0.0345			-0.0001					-0.0001			FRE	EUR
FRE_523	0.0184	0.0339					0.0339			-0.0016					-0.0016			FRE	EUR
FRE_524	0.0196	0.0341					0.0341			-0.0006					-0.0006			FRE	EUR
FRE_525	0.0182	0.0329					0.0329			-0.0024					-0.0024			FRE	EUR
FRE_526	0.0185	0.0335					0.0335			-0.0011					-0.0011			FRE	EUR
FRE_527	0.0189	0.0342					0.0342			-0.0022					-0.0022			FRE	EUR
FRE_528	0.0186	0.0322					0.0322			-0.001					-0.001			FRE	EUR
FRE_529	0.0193	0.0344					0.0344			0.0006					0.0006			FRE	EUR
FRE_530	0.0198	0.0347					0.0347			0.0005					0.0005			FRE	EUR
FRE_531	0.0206	0.0347					0.0347			0.0019					0.0019			FRE	EUR
FRE_533	0.0181	0.0345					0.0345			-0.0022					-0.0022			FRE	EUR
FRE_534	0.0187	0.0343					0.0343			-0.0006					-0.0006			FRE	EUR
FRE_535	0.0184	0.0346					0.0346			-0.0027					-0.0027			FRE	EUR
FRE_536	0.0198	0.0335					0.0335			0.0015					0.0015			FRE	EUR
FRE_537	0.0191	0.0339					0.0339			-0.0013					-0.0013			FRE	EUR
FRE_538	0.0201	0.0337					0.0337			-0.0003					-0.0003			FRE	EUR
FRE_539	0.0203	0.0346					0.0346			-0.0009					-0.0009			FRE	EUR
ITA_1147	0.0209	0.0347					0.0347			0					0			ITA	EUR
ITA_1151	0.0205	0.0347					0.0347			0.0017					0.0017			ITA	EUR
ITA_1152	0.0211	0.0342					0.0342			0.0003					0.0003			ITA	EUR
ITA_1153	0.0206	0.0342					0.0342			0.0013					0.0013			ITA	EUR
ITA_1155	0.0203	0.0336					0.0336			0.0003					0.0003			ITA	EUR
ITA_1156	0.0207	0.0345					0.0345			0.0017					0.0017			ITA	EUR
ITA_1157	0.0206	0.0338					0.0338			0.0003					0.0003			ITA	EUR
ITA_1171	0.02	0.0345					0.0345			0.0005					0.0005			ITA	EUR
ITA_1172	0.0204	0.0341					0.0341			0.0005					0.0005			ITA	EUR
ITA_1173	0.0205	0.0349					0.0349			0.0013					0.0013			ITA	EUR
ITA_1174	0.0214	0.0342					0.0342			0.0002					0.0002			ITA	EUR
ITA_1177	0.0201	0.0347					0.0347			0.0013					0.0013			ITA	EUR
ORC_794	0.0175	0.0328					0.0328			-0.0029					-0.0029			ORC	EUR
ORC_795	0.0184	0.0331					0.0331			-0.0013					-0.0013			ORC	EUR
ORC_796	0.0174	0.034					0.034			-0.0033					-0.0033			ORC	EUR
ORC_797	0.0183	0.0341					0.0341			-0.0036					-0.0036			ORC	EUR
ORC_798	0.0188	0.0336					0.0336			-0.0033					-0.0033			ORC	EUR
ORC_799	0.0189	0.0344					0.0344			-0.0035					-0.0035			ORC	EUR
ORC_800	0.0176	0.0342					0.0342			-0.0028					-0.0028			ORC	EUR
ORC_802	0.0178	0.0338					0.0338			-0.0038					-0.0038			ORC	EUR
ORC_803	0.0182	0.0343					0.0343			-0.0027					-0.0027			ORC	EUR
ORC_804	0.0178	0.0341					0.0341			-0.0038					-0.0038			ORC	EUR
ORC_805	0.0178	0.0341					0.0341			-0.0022					-0.0022			ORC	EUR
ORC_806	0.0194	0.0357					0.0357			-0.0018					-0.0018			ORC	EUR
ORC_807	0.0179	0.0341					0.0341			-0.0002					-0.0002			ORC	EUR
ORC_808	0.0171	0.0337					0.0337			-0.0032					-0.0032			ORC	EUR
ORC_810	0.0191	0.0343					0.0343			-0.0022					-0.0022			ORC	EUR
RUS_879	0.0118	0.0304					0.0304			-0.0028					-0.0028			RUS	EUR
RUS_880	0.0128	0.03					0.03			-0.0026					-0.0026			RUS	EUR
RUS_881	0.0114	0.0284					0.0284			-0.0045					-0.0045			RUS	EUR
RUS_882	0.0103	0.0292					0.0292			-0.0018					-0.0018			RUS	EUR
RUS_883	0.0111	0.0295					0.0295			-0.0028					-0.0028			RUS	EUR
RUS_884	0.0136	0.031					0.031			-0.0032					-0.0032			RUS	EUR
RUS_885	0.0118	0.0309					0.0309			-0.0031					-0.0031			RUS	EUR
RUS_886	0.0121	0.0295					0.0295			-0.0029					-0.0029			RUS	EUR
RUS_887	0.0124	0.0302					0.0302			-0.0026					-0.0026			RUS	EUR
RUS_888	0.0129	0.0308					0.0308			-0.0011					-0.0011			RUS	EUR
RUS_889	0.0123	0.0291					0.0291			-0.0032					-0.0032			RUS	EUR
RUS_890	0.0121	0.0297					0.0297			-0.0039					-0.0039			RUS	EUR
RUS_891	0.0117	0.0296					0.0296			-0.0024					-0.0024			RUS	EUR
RUS_892	0.012	0.0302					0.0302			-0.0021					-0.0021			RUS	EUR
RUS_893	0.011	0.0285					0.0285			-0.0027					-0.0027			RUS	EUR
RUS_894	0.0108	0.0283					0.0283			-0.004					-0.004			RUS	EUR
RUS_895	0.011	0.0279					0.0279			-0.0042					-0.0042			RUS	EUR
RUS_896	0.0115	0.0284					0.0284			-0.0031					-0.0031			RUS	EUR
RUS_897	0.0114	0.0297					0.0297			-0.0042					-0.0042			RUS	EUR
RUS_898	0.01	0.0292					0.0292			-0.003					-0.003			RUS	EUR
RUS_899	0.0122	0.0295					0.0295			-0.0023					-0.0023			RUS	EUR
RUS_900	0.0138	0.0314					0.0314			-0.0025					-0.0025			RUS	EUR
RUS_901	0.0105	0.0294					0.0294			-0.0022					-0.0022			RUS	EUR
RUS_902	0.0127	0.0296					0.0296			-0.0027					-0.0027			RUS	EUR
RUS_903	0.0121	0.0303					0.0303			-0.0012					-0.0012			RUS	EUR
SARD_665	0.0225	0.0343					0.0343			0.0056					0.0056			SARD	EUR
SARD_666	0.023	0.0354					0.0354			0.0035					0.0035			SARD	EUR
SARD_667	0.0226	0.0352					0.0352			0.0021					0.0021			SARD	EUR
SARD_668	0.023	0.0351					0.0351			0.0032					0.0032			SARD	EUR
SARD_669	0.0228	0.0346					0.0346			0.0037					0.0037			SARD	EUR
SARD_670	0.0231	0.035					0.035			0.0036					0.0036			SARD	EUR
SARD_671	0.0235	0.0354					0.0354			0.0044					0.0044			SARD	EUR
SARD_672	0.0227	0.035					0.035			0.0051					0.0051			SARD	EUR
SARD_673	0.0233	0.0348					0.0348			0.0018					0.0018			SARD	EUR
SARD_674	0.0229	0.0357					0.0357			0.003					0.003			SARD	EUR
SARD_1062	0.0232	0.0344					0.0344			0.0042					0.0042			SARD	EUR
SARD_1063	0.0229	0.035					0.035			0.0022					0.0022			SARD	EUR
SARD_1064	0.0233	0.035					0.035			0.0025					0.0025			SARD	EUR
SARD_1065	0.0234	0.0353					0.0353			0.0039					0.0039			SARD	EUR
SARD_1066	0.0237	0.0347					0.0347			0.0038					0.0038			SARD	EUR
SARD_1067	0.022	0.0349					0.0349			0.0028					0.0028			SARD	EUR
SARD_1068	0.0235	0.035					0.035			0.0046					0.0046			SARD	EUR
SARD_1069	0.0227	0.0353					0.0353			0.0034					0.0034			SARD	EUR
SARD_1070	0.0232	0.0343					0.0343			0.0042					0.0042			SARD	EUR
SARD_1071	0.0228	0.0334					0.0334			0.0047					0.0047			SARD	EUR
SARD_1072	0.0225	0.035					0.035			0.0031					0.0031			SARD	EUR
SARD_1073	0.0231	0.0348					0.0348			0.0022					0.0022			SARD	EUR
SARD_1074	0.0231	0.0349					0.0349			0.0041					0.0041			SARD	EUR
SARD_1075	0.0235	0.0354					0.0354			0.0045					0.0045			SARD	EUR
SARD_1076	0.0237	0.0349					0.0349			0.0019					0.0019			SARD	EUR
SARD_1077	0.0231	0.036					0.036			0.0031					0.0031			SARD	EUR
SARD_1078	0.0223	0.0355					0.0355			0.0046					0.0046			SARD	EUR
SARD_1079	0.0226	0.0349					0.0349			0.0035					0.0035			SARD	EUR
TUSC_1161	0.0207	0.0346					0.0346			0.0018					0.0018			TUSC	EUR
TUSC_1162	0.0209	0.0328					0.0328			0.0018					0.0018			TUSC	EUR
TUSC_1163	0.0204	0.0336					0.0336			0.0007					0.0007			TUSC	EUR
TUSC_1164	0.0211	0.0339					0.0339			0.0022					0.0022			TUSC	EUR
TUSC_1166	0.0209	0.0333					0.0333			0.0009					0.0009			TUSC	EUR
TUSC_1167	0.0196	0.0321					0.0321			0.0016					0.0016			TUSC	EUR
TUSC_1168	0.02	0.0333					0.0333			-0.0001					-0.0001			TUSC	EUR
TUSC_1169	0.0203	0.0342					0.0342			0.0016					0.0016			TUSC	EUR
BED_607	0.0252	0.0218						0.0218		0.0055						0.0055		BED	NAFR/ME
BED_608	0.0248	0.0233						0.0233		0.0046						0.0046		BED	NAFR/ME
BED_609	0.0245	0.0197						0.0197		0.002						0.002		BED	NAFR/ME
BED_610	0.0252	0.0247						0.0247		0.0049						0.0049		BED	NAFR/ME
BED_611	0.0261	0.0137						0.0137		0.0021						0.0021		BED	NAFR/ME
BED_612	0.026	0.0253						0.0253		0.0054						0.0054		BED	NAFR/ME
BED_613	0.023	0.0215						0.0215		0.0029						0.0029		BED	NAFR/ME
BED_614	0.0244	0.0214						0.0214		0.0032						0.0032		BED	NAFR/ME
BED_615	0.0231	0.0225						0.0225		0.0026						0.0026		BED	NAFR/ME
BED_616	0.0246	0.0255						0.0255		0.0054						0.0054		BED	NAFR/ME
BED_618	0.0255	0.0264						0.0264		0.0035						0.0035		BED	NAFR/ME
BED_619	0.0253	0.0223						0.0223		0.0041						0.0041		BED	NAFR/ME
BED_620	0.0249	0.0165						0.0165		0.003						0.003		BED	NAFR/ME
BED_621	0.0424	-0.0557						-0.0557		-0.0021						-0.0021		BED	NAFR/ME
BED_622	0.0249	0.0207						0.0207		0.0032						0.0032		BED	NAFR/ME
BED_623	0.0258	0.0229						0.0229		0.0046						0.0046		BED	NAFR/ME
BED_624	0.0266	0.0225						0.0225		0.0042						0.0042		BED	NAFR/ME
BED_625	0.0237	0.0228						0.0228		0.0036						0.0036		BED	NAFR/ME
BED_626	0.0239	0.0223						0.0223		0.0021						0.0021		BED	NAFR/ME
BED_627	0.0264	0.0163						0.0163		0.0033						0.0033		BED	NAFR/ME
BED_628	0.0237	0.0216						0.0216		0.0036						0.0036		BED	NAFR/ME
BED_629	0.0236	0.0201						0.0201		0.0031						0.0031		BED	NAFR/ME
BED_630	0.0247	0.0244						0.0244		0.0046						0.0046		BED	NAFR/ME
BED_631	0.0252	0.025						0.025		0.0051						0.0051		BED	NAFR/ME
BED_632	0.0264	0.016						0.016		0.0017						0.0017		BED	NAFR/ME
BED_634	0.0256	0.0168						0.0168		0.0034						0.0034		BED	NAFR/ME
BED_635	0.0243	0.0185						0.0185		0.0007						0.0007		BED	NAFR/ME
BED_636	0.0249	0.0242						0.0242		0.0042						0.0042		BED	NAFR/ME
BED_637	0.0242	0.0202						0.0202		0.004						0.004		BED	NAFR/ME
BED_638	0.0267	0.0164						0.0164		0.0028						0.0028		BED	NAFR/ME
BED_639	0.0243	0.0225						0.0225		0.0031						0.0031		BED	NAFR/ME
BED_640	0.0259	0.0148						0.0148		0.0029						0.0029		BED	NAFR/ME
BED_641	0.0257	0.0244						0.0244		0.004						0.004		BED	NAFR/ME
BED_642	0.0245	0.023						0.023		0.004						0.004		BED	NAFR/ME
BED_643	0.0248	0.0255						0.0255		0.0036						0.0036		BED	NAFR/ME
BED_644	0.0237	0.0229						0.0229		0.0023						0.0023		BED	NAFR/ME
BED_645	0.0249	0.019						0.019		0.0029						0.0029		BED	NAFR/ME
BED_646	0.0284	0.0126						0.0126		0.0033						0.0033		BED	NAFR/ME
BED_647	0.023	0.0213						0.0213		0.003						0.003		BED	NAFR/ME
BED_648	0.0242	0.0239						0.0239		0.0041						0.0041		BED	NAFR/ME
BED_649	0.0247	0.0261						0.0261		0.0037						0.0037		BED	NAFR/ME
BED_650	0.0243	0.0248						0.0248		0.0039						0.0039		BED	NAFR/ME
BED_651	0.025	0.0239						0.0239		0.0033						0.0033		BED	NAFR/ME
BED_653	0.0245	0.0246						0.0246		0.0042						0.0042		BED	NAFR/ME
BED_654	0.0221	0.0241						0.0241		0.0026						0.0026		BED	NAFR/ME
BED_701	0.0246	0.0252						0.0252		0.0037						0.0037		BED	NAFR/ME
DRU_557	0.0225	0.0305						0.0305		0.0041						0.0041		DRU	NAFR/ME
DRU_558	0.0223	0.0301						0.0301		0.0027						0.0027		DRU	NAFR/ME
DRU_559	0.0218	0.03						0.03		0.0034						0.0034		DRU	NAFR/ME
DRU_560	0.022	0.0302						0.0302		0.0028						0.0028		DRU	NAFR/ME
DRU_561	0.0221	0.0288						0.0288		0.0015						0.0015		DRU	NAFR/ME
DRU_562	0.0222	0.0297						0.0297		0.0047						0.0047		DRU	NAFR/ME
DRU_563	0.0225	0.028						0.028		0.0057						0.0057		DRU	NAFR/ME
DRU_564	0.0228	0.0302						0.0302		0.0033						0.0033		DRU	NAFR/ME
DRU_565	0.023	0.029						0.029		0.0037						0.0037		DRU	NAFR/ME
DRU_566	0.0219	0.0279						0.0279		0.0035						0.0035		DRU	NAFR/ME
DRU_567	0.0229	0.0297						0.0297		0.0048						0.0048		DRU	NAFR/ME
DRU_568	0.0219	0.0299						0.0299		0.003						0.003		DRU	NAFR/ME
DRU_569	0.0229	0.028						0.028		0.0034						0.0034		DRU	NAFR/ME
DRU_571	0.0219	0.0304						0.0304		0.0013						0.0013		DRU	NAFR/ME
DRU_572	0.0226	0.0289						0.0289		0.0049						0.0049		DRU	NAFR/ME
DRU_573	0.023	0.0292						0.0292		0.0008						0.0008		DRU	NAFR/ME
DRU_574	0.0227	0.0305						0.0305		0.0033						0.0033		DRU	NAFR/ME
DRU_575	0.0225	0.0302						0.0302		0.0042						0.0042		DRU	NAFR/ME
DRU_576	0.0232	0.0255						0.0255		0.0032						0.0032		DRU	NAFR/ME
DRU_577	0.0218	0.0287						0.0287		0.0043						0.0043		DRU	NAFR/ME
DRU_578	0.0219	0.0275						0.0275		0.0034						0.0034		DRU	NAFR/ME
DRU_579	0.0217	0.0295						0.0295		0.0037						0.0037		DRU	NAFR/ME
DRU_580	0.0216	0.029						0.029		0.0038						0.0038		DRU	NAFR/ME
DRU_581	0.0215	0.0297						0.0297		0.0025						0.0025		DRU	NAFR/ME
DRU_582	0.0217	0.0281						0.0281		0.0036						0.0036		DRU	NAFR/ME
DRU_583	0.0222	0.0307						0.0307		0.0023						0.0023		DRU	NAFR/ME
DRU_584	0.0221	0.0288						0.0288		0.0025						0.0025		DRU	NAFR/ME
DRU_586	0.022	0.0285						0.0285		0.0054						0.0054		DRU	NAFR/ME
DRU_587	0.0216	0.0293						0.0293		0.0026						0.0026		DRU	NAFR/ME
DRU_588	0.0232	0.0303						0.0303		0.0025						0.0025		DRU	NAFR/ME
DRU_590	0.022	0.0318						0.0318		0.003						0.003		DRU	NAFR/ME
DRU_591	0.0218	0.0301						0.0301		0.002						0.002		DRU	NAFR/ME
DRU_594	0.0226	0.0295						0.0295		0.005						0.005		DRU	NAFR/ME
DRU_595	0.0215	0.0297						0.0297		0.0026						0.0026		DRU	NAFR/ME
DRU_597	0.022	0.0297						0.0297		0.0017						0.0017		DRU	NAFR/ME
DRU_598	0.0225	0.0284						0.0284		0.0031						0.0031		DRU	NAFR/ME
DRU_599	0.0214	0.0311						0.0311		0.0031						0.0031		DRU	NAFR/ME
DRU_600	0.0216	0.0304						0.0304		0.0048						0.0048		DRU	NAFR/ME
DRU_601	0.0232	0.0299						0.0299		0.0049						0.0049		DRU	NAFR/ME
DRU_602	0.0222	0.03						0.03		0.0027						0.0027		DRU	NAFR/ME
DRU_604	0.0219	0.0307						0.0307		0.0056						0.0056		DRU	NAFR/ME
DRU_606	0.0227	0.0288						0.0288		0.0028						0.0028		DRU	NAFR/ME
MOZ_1253	0.0296	0.0082						0.0082		0.0024						0.0024		MOZ	NAFR/ME
MOZ_1254	0.0288	0.0087						0.0087		0.0043						0.0043		MOZ	NAFR/ME
MOZ_1255	0.028	0.011						0.011		0.0009						0.0009		MOZ	NAFR/ME
MOZ_1256	0.0301	0.0069						0.0069		0.0019						0.0019		MOZ	NAFR/ME
MOZ_1257	0.0311	0.0039						0.0039		0.0024						0.0024		MOZ	NAFR/ME
MOZ_1258	0.0286	0.0096						0.0096		0.0029						0.0029		MOZ	NAFR/ME
MOZ_1259	0.0289	0.0056						0.0056		0.0035						0.0035		MOZ	NAFR/ME
MOZ_1260	0.0303	0.0053						0.0053		0.003						0.003		MOZ	NAFR/ME
MOZ_1261	0.0322	-0.0089						-0.0089		0.0005						0.0005		MOZ	NAFR/ME
MOZ_1262	0.0289	0.0061						0.0061		0.0033						0.0033		MOZ	NAFR/ME
MOZ_1263	0.0274	0.0126						0.0126		0.003						0.003		MOZ	NAFR/ME
MOZ_1264	0.0287	0.0095						0.0095		0.0015						0.0015		MOZ	NAFR/ME
MOZ_1265	0.0297	0.0086						0.0086		0.0018						0.0018		MOZ	NAFR/ME
MOZ_1266	0.0288	0.0082						0.0082		0.0022						0.0022		MOZ	NAFR/ME
MOZ_1267	0.029	0.0083						0.0083		0.0043						0.0043		MOZ	NAFR/ME
MOZ_1268	0.0299	0.0076						0.0076		0.003						0.003		MOZ	NAFR/ME
MOZ_1269	0.0297	0.0071						0.0071		0.0009						0.0009		MOZ	NAFR/ME
MOZ_1270	0.0417	-0.0487						-0.0487		-0.0038						-0.0038		MOZ	NAFR/ME
MOZ_1271	0.0393	-0.034						-0.034		-0.0027						-0.0027		MOZ	NAFR/ME
MOZ_1272	0.0287	0.0095						0.0095		0.0028						0.0028		MOZ	NAFR/ME
MOZ_1273	0.0278	0.0096						0.0096		0.0014						0.0014		MOZ	NAFR/ME
MOZ_1274	0.0309	0.0005						0.0005		0.0018						0.0018		MOZ	NAFR/ME
MOZ_1275	0.0293	0.0096						0.0096		0.0025						0.0025		MOZ	NAFR/ME
MOZ_1276	0.0304	0.0057						0.0057		0.0015						0.0015		MOZ	NAFR/ME
MOZ_1277	0.0293	0.0071						0.0071		0.0033						0.0033		MOZ	NAFR/ME
MOZ_1278	0.0287	0.0082						0.0082		0.0021						0.0021		MOZ	NAFR/ME
MOZ_1279	0.0291	0.0082						0.0082		0.0031						0.0031		MOZ	NAFR/ME
MOZ_1280	0.03	0.0091						0.0091		0.0025						0.0025		MOZ	NAFR/ME
MOZ_1282	0.0288	0.0106						0.0106		0.0039						0.0039		MOZ	NAFR/ME
PAL_675	0.0238	0.0246						0.0246		0.0042						0.0042		PAL	NAFR/ME
PAL_676	0.0228	0.0241						0.0241		0.0048						0.0048		PAL	NAFR/ME
PAL_677	0.0242	0.024						0.024		0.0023						0.0023		PAL	NAFR/ME
PAL_678	0.0241	0.0237						0.0237		0.0035						0.0035		PAL	NAFR/ME
PAL_679	0.0236	0.0256						0.0256		0.0035						0.0035		PAL	NAFR/ME
PAL_680	0.0247	0.0197						0.0197		0.0036						0.0036		PAL	NAFR/ME
PAL_682	0.0231	0.0238						0.0238		0.0026						0.0026		PAL	NAFR/ME
PAL_683	0.0233	0.0221						0.0221		0.005						0.005		PAL	NAFR/ME
PAL_684	0.0235	0.0235						0.0235		0.0053						0.0053		PAL	NAFR/ME
PAL_685	0.0253	0.02						0.02		0.0028						0.0028		PAL	NAFR/ME
PAL_686	0.0232	0.0212						0.0212		0.0041						0.0041		PAL	NAFR/ME
PAL_687	0.0239	0.0258						0.0258		0.0034						0.0034		PAL	NAFR/ME
PAL_688	0.0229	0.0239						0.0239		0.0038						0.0038		PAL	NAFR/ME
PAL_689	0.0246	0.0246						0.0246		0.0036						0.0036		PAL	NAFR/ME
PAL_690	0.0231	0.0246						0.0246		0.0043						0.0043		PAL	NAFR/ME
PAL_691	0.0242	0.0228						0.0228		0.0031						0.0031		PAL	NAFR/ME
PAL_692	0.0262	0.0109						0.0109		0.0028						0.0028		PAL	NAFR/ME
PAL_693	0.023	0.0243						0.0243		0.0032						0.0032		PAL	NAFR/ME
PAL_694	0.0236	0.0244						0.0244		0.0049						0.0049		PAL	NAFR/ME
PAL_696	0.0242	0.0242						0.0242		0.003						0.003		PAL	NAFR/ME
PAL_697	0.0238	0.025						0.025		0.0044						0.0044		PAL	NAFR/ME
PAL_698	0.0234	0.0224						0.0224		0.0058						0.0058		PAL	NAFR/ME
PAL_699	0.0242	0.0232						0.0232		0.0036						0.0036		PAL	NAFR/ME
PAL_700	0.0241	0.0214						0.0214		0.0018						0.0018		PAL	NAFR/ME
PAL_722	0.023	0.0231						0.0231		0.0039						0.0039		PAL	NAFR/ME
PAL_723	0.0244	0.0195						0.0195		0.0025						0.0025		PAL	NAFR/ME
PAL_724	0.0242	0.0237						0.0237		0.0043						0.0043		PAL	NAFR/ME
PAL_725	0.023	0.0244						0.0244		0.0038						0.0038		PAL	NAFR/ME
PAL_726	0.0236	0.0231						0.0231		0.003						0.003		PAL	NAFR/ME
PAL_727	0.0242	0.0252						0.0252		0.004						0.004		PAL	NAFR/ME
PAL_729	0.0234	0.0226						0.0226		0.0021						0.0021		PAL	NAFR/ME
PAL_730	0.0231	0.0251						0.0251		0.003						0.003		PAL	NAFR/ME
PAL_731	0.0242	0.0196						0.0196		0.004						0.004		PAL	NAFR/ME
PAL_732	0.0249	0.0253						0.0253		0.0033						0.0033		PAL	NAFR/ME
PAL_733	0.0231	0.0243						0.0243		0.0023						0.0023		PAL	NAFR/ME
PAL_734	0.0231	0.0233						0.0233		0.0034						0.0034		PAL	NAFR/ME
PAL_735	0.0235	0.0238						0.0238		0.0046						0.0046		PAL	NAFR/ME
PAL_736	0.0229	0.0242						0.0242		0.005						0.005		PAL	NAFR/ME
PAL_737	0.0241	0.0245						0.0245		0.0036						0.0036		PAL	NAFR/ME
PAL_738	0.0254	0.0152						0.0152		0.003						0.003		PAL	NAFR/ME
PAL_739	0.0243	0.0205						0.0205		0.0025						0.0025		PAL	NAFR/ME
PAL_740	0.0232	0.025						0.025		0.0031						0.0031		PAL	NAFR/ME
PAL_741	0.0232	0.0226						0.0226		0.0026						0.0026		PAL	NAFR/ME
PAL_744	0.0256	0.0158						0.0158		0.0017						0.0017		PAL	NAFR/ME
PAL_745	0.0224	0.0228						0.0228		0.0028						0.0028		PAL	NAFR/ME
PAL_746	0.0246	0.0226						0.0226		0.005						0.005		PAL	NAFR/ME
MEL_491	-0.0213	-0.0148							-0.0148	0.031							0.031	MEL	OCE
MEL_655	-0.0211	-0.0143							-0.0143	0.0324							0.0324	MEL	OCE
MEL_656	-0.0211	-0.0146							-0.0146	0.0309							0.0309	MEL	OCE
MEL_661	-0.0211	-0.0131							-0.0131	0.029							0.029	MEL	OCE
MEL_662	-0.0215	-0.0148							-0.0148	0.0314							0.0314	MEL	OCE
MEL_663	-0.0208	-0.0143							-0.0143	0.0315							0.0315	MEL	OCE
MEL_664	-0.0217	-0.0138							-0.0138	0.0316							0.0316	MEL	OCE
MEL_787	-0.0206	-0.0138							-0.0138	0.0315							0.0315	MEL	OCE
MEL_788	-0.0203	-0.0139							-0.0139	0.0309							0.0309	MEL	OCE
MEL_1027	-0.0204	-0.0143							-0.0143	0.0318							0.0318	MEL	OCE
PAP_540	-0.0162	-0.0151							-0.0151	0.0312							0.0312	PAP	OCE
PAP_541	-0.0163	-0.0143							-0.0143	0.0326							0.0326	PAP	OCE
PAP_542	-0.016	-0.0145							-0.0145	0.0318							0.0318	PAP	OCE
PAP_543	-0.0169	-0.0146							-0.0146	0.0315							0.0315	PAP	OCE
PAP_544	-0.0216	-0.0146							-0.0146	0.0329							0.0329	PAP	OCE
PAP_545	-0.0158	-0.0141							-0.0141	0.0328							0.0328	PAP	OCE
PAP_546	-0.0159	-0.0142							-0.0142	0.0322							0.0322	PAP	OCE
PAP_547	-0.0169	-0.0145							-0.0145	0.0329							0.0329	PAP	OCE
PAP_548	-0.0163	-0.0148							-0.0148	0.0313							0.0313	PAP	OCE
PAP_549	-0.016	-0.0145							-0.0145	0.0315							0.0315	PAP	OCE
PAP_550	-0.0167	-0.0147							-0.0147	0.0318							0.0318	PAP	OCE
PAP_551	-0.0165	-0.0143							-0.0143	0.0329							0.0329	PAP	OCE
PAP_552	-0.0159	-0.0147							-0.0147	0.0311							0.0311	PAP	OCE
PAP_553	-0.0164	-0.0142							-0.0142	0.0324							0.0324	PAP	OCE
PAP_554	-0.0163	-0.014							-0.014	0.031							0.031	PAP	OCE
PAP_555	-0.0157	-0.0142							-0.0142	0.0311							0.0311	PAP	OCE
PAP_556	-0.016	-0.0144							-0.0144	0.0307							0.0307	PAP	OCE
1	0.016	-0.0195								-0.0289								kalinago
2	-0.0274	-0.0104								-0.0855								kalinago
3	-0.0159	-0.0135								-0.0691								kalinago
203	-0.0015	-0.025								-0.0566								kalinago
4	-0.0309	-0.0136								-0.092								kalinago
8	-0.0286	-0.0118								-0.0712								kalinago
9	0.0132	-0.0363								-0.0401								kalinago
5	-0.0172	-0.0156								-0.0752								kalinago
14	-0.0219	-0.0156								-0.0791								kalinago
35	-0.0193	-0.017								-0.06								kalinago
6	0.0056	-0.0326								-0.0498								kalinago
22	-0.0207	-0.0193								-0.0791								kalinago
42	-0.006	-0.019								-0.0592								kalinago
7	-0.0138	-0.0204								-0.0726								kalinago
26	-0.027	-0.0137								-0.0838								kalinago
62	-0.0222	-0.0159								-0.085								kalinago
11	-0.036	-0.0085								-0.0811								kalinago
31	0.0237	-0.0383								-0.0259								kalinago
64	-0.0029	-0.0264								-0.0569								kalinago
33	-0.0333	-0.0088								-0.0703								kalinago
80	0.0063	-0.0334								-0.0478								kalinago
16	-0.0238	-0.0118								-0.0844								kalinago
39	0.0038	-0.0166								-0.0442								kalinago
81	-0.0083	-0.0205								-0.0628								kalinago
19	-0.0014	-0.021								-0.0547								kalinago
40	0.0024	-0.0302								-0.0505								kalinago
163	-0.0258	-0.0148								-0.0885								kalinago
20	-0.0106	-0.0196								-0.0655								kalinago
43	-0.0058	-0.0191								-0.0614								kalinago
178	-0.0225	-0.0177								-0.0824								kalinago
21	-0.0071	-0.0219								-0.061								kalinago
44	0.0108	-0.0414								-0.0457								kalinago
185	0.0097	-0.0367								-0.0449								kalinago
48	0.0438	-0.0596								-0.0056								kalinago
192	-0.0139	-0.0177								-0.072								kalinago
29	-0.0308	-0.0069								-0.0885								kalinago
49	0.0029	-0.0321								-0.0518								kalinago
225	0.0073	-0.0254								-0.0408								kalinago
30	-0.0124	-0.0231								-0.0678								kalinago
51	-0.0066	-0.0251								-0.063								kalinago
231	0.0102	-0.0383								-0.0445								kalinago
32	-0.0192	-0.013								-0.0773								kalinago
60	0.0213	-0.0347								-0.0285								kalinago
232	-0.0257	-0.0135								-0.0844								kalinago
34	-0.0202	-0.0152								-0.0786								kalinago
65	0.0078	-0.0385								-0.0474								kalinago
263	0.0108	-0.0348								-0.0432								kalinago
36	-0.0072	-0.0202								-0.0623								kalinago
68	-0.004	-0.0312								-0.0642								kalinago
278	-0.0047	-0.0247								-0.0578								kalinago
37	-0.0016	-0.0206								-0.0543								kalinago
84	-0.0014	-0.026								-0.0543								kalinago
309	-0.0011	-0.0258								-0.0576								kalinago
38	-0.0239	-0.0131								-0.0841								kalinago
85	-0.0266	-0.0121								-0.0827								kalinago
329	-0.0054	-0.0181								-0.0503								kalinago
41	0.0143	-0.0448								-0.041								kalinago
89	0.0362	-0.0451								-0.01								kalinago
340	0.0128	-0.0327								-0.0393								kalinago
45	-0.008	-0.0208								-0.0626								kalinago
90	0.0163	-0.0347								-0.0347								kalinago
347	-0.0145	-0.0109								-0.0691								kalinago
46	-0.016	-0.0164								-0.0732								kalinago
112	-0.018	-0.0154								-0.0774								kalinago
354	-0.016	-0.0081								-0.0674								kalinago
52	-0.0028	-0.0266								-0.0578								kalinago
116	-0.0165	-0.0176								-0.0738								kalinago
356	0.0173	-0.0057								-0.0197								kalinago
54	0.0273	-0.0447								-0.0228								kalinago
123	-0.0286	-0.0105								-0.0864								kalinago
362	0.0388	-0.0439								-0.0055								kalinago
55	-0.0146	-0.0156								-0.0748								kalinago
124	-0.0155	-0.0229								-0.0625								kalinago
370	-0.022	-0.0131								-0.0804								kalinago
56	-0.0136	-0.017								-0.0711								kalinago
125	0.0021	-0.0335								-0.0504								kalinago
375	-0.0093	-0.0219								-0.0626								kalinago
57	-0.0173	-0.0177								-0.0764								kalinago
135	0.0262	-0.0245								-0.011								kalinago
419	-0.0239	-0.0138								-0.0748								kalinago
59	0.0004	-0.0217								-0.0497								kalinago
136	-0.0082	-0.0221								-0.0644								kalinago
442	-0.0099	-0.0117								-0.0594								kalinago
61	-0.0214	-0.0157								-0.0791								kalinago
142	-0.018	-0.0128								-0.0735								kalinago
444	0.0192	-0.0364								-0.0317								kalinago
63	0.0169	-0.0421								-0.0353								kalinago
144	-0.0142	-0.0206								-0.0725								kalinago
445	0.0125	-0.0223								-0.0347								kalinago
10	-0.0051	-0.0228								-0.0614								kalinago
66	-0.0274	-0.0142								-0.0873								kalinago
148	-0.0046	-0.0235								-0.0594								kalinago
12	0.0209	-0.0453								-0.0329								kalinago
67	-0.0113	-0.0226								-0.0666								kalinago
153	-0.0157	-0.0199								-0.0711								kalinago
70	-0.0152	-0.0233								-0.0734								kalinago
156	-0.0143	-0.0079								-0.0669								kalinago
71	-0.0235	-0.015								-0.0708								kalinago
165	0.0026	-0.0237								-0.0483								kalinago
72	0.0064	-0.0334								-0.0478								kalinago
171	-0.0174	-0.0169								-0.0773								kalinago
27	-0.0172	-0.0187								-0.0748								kalinago
73	0.0027	-0.0278								-0.052								kalinago
187	-0.0066	-0.0199								-0.0596								kalinago
47	-0.0146	-0.0201								-0.0709								kalinago
74	-0.0156	-0.0148								-0.0714								kalinago
196	-0.0086	-0.0222								-0.0637								kalinago
50	0.012	-0.0396								-0.0421								kalinago
75	-0.0012	-0.0241								-0.0555								kalinago
204	0.0241	-0.0443								-0.0258								kalinago
53	-0.0139	-0.0187								-0.0715								kalinago
76	-0.0226	-0.0137								-0.0715								kalinago
207	-0.0196	-0.0173								-0.0745								kalinago
58	-0.0143	-0.0158								-0.0711								kalinago
77	-0.0149	-0.019								-0.0661								kalinago
211	0.0287	-0.029								-0.0166								kalinago
78	-0.0012	-0.0258								-0.0554								kalinago
239	-0.009	-0.0215								-0.0612								kalinago
79	-0.0082	-0.0192								-0.0618								kalinago
82	-0.0272	-0.0131								-0.0852								kalinago
244	-0.0176	-0.0122								-0.0688								kalinago
83	0.0253	-0.0431								-0.0249								kalinago
87	-0.005	-0.024								-0.0611								kalinago
248	-0.0177	-0.0131								-0.07								kalinago
86	-0.0275	-0.0121								-0.0862								kalinago
88	0.0134	-0.0331								-0.0374								kalinago
252	-0.0045	-0.0218								-0.0476								kalinago
91	-0.0242	-0.0113								-0.0826								kalinago
92	-0.0134	-0.0174								-0.0704								kalinago
255	0.0073	-0.0353								-0.0487								kalinago
94	-0.0178	-0.0165								-0.0772								kalinago
95	0.014	-0.0282								-0.0376								kalinago
267	0.014	-0.0362								-0.0382								kalinago
96	0.0194	-0.0409								-0.0305								kalinago
101	-0.0267	-0.0143								-0.0871								kalinago
268	-0.0002	-0.0313								-0.0501								kalinago
97	0.0135	-0.0266								-0.0344								kalinago
107	-0.0222	-0.0192								-0.0821								kalinago
270	-0.014	-0.0154								-0.0714								kalinago
98	0.0036	-0.0278								-0.049								kalinago
130	0.0214	-0.0398								-0.0277								kalinago
280	-0.0055	-0.0197								-0.0549								kalinago
99	0.0002	-0.0272								-0.0529								kalinago
131	-0.0146	-0.0129								-0.0696								kalinago
281	-0.0196	-0.0144								-0.0765								kalinago
100	0.0017	-0.0279								-0.0511								kalinago
132	0.0337	-0.0537								-0.0172								kalinago
282	-0.0183	-0.0211								-0.0776								kalinago
102	-0.0126	-0.0191								-0.0699								kalinago
133	-0.0108	-0.0172								-0.0659								kalinago
289	0.0035	-0.0156								-0.0431								kalinago
103	0.0048	-0.0312								-0.0505								kalinago
134	-0.0221	-0.0161								-0.0774								kalinago
296	-0.0204	-0.0157								-0.0786								kalinago
104	-0.0113	-0.0154								-0.0582								kalinago
147	-0.0126	-0.0245								-0.0607								kalinago
297	0.0095	-0.0339								-0.0422								kalinago
105	-0.0111	-0.0165								-0.0657								kalinago
151	0.0188	-0.0368								-0.0286								kalinago
299	0.0061	-0.0297								-0.047								kalinago
106	-0.0212	-0.0129								-0.0749								kalinago
160	-0.0276	-0.0143								-0.0858								kalinago
300	-0.0103	-0.019								-0.0669								kalinago
108	0	-0.0239								-0.0525								kalinago
161	-0.0124	-0.0184								-0.0691								kalinago
301	0.0085	-0.0317								-0.0445								kalinago
109	-0.0284	-0.0113								-0.0867								kalinago
172	-0.0342	-0.0088								-0.0929								kalinago
302	-0.0022	-0.0275								-0.0602								kalinago
110	0.0094	-0.0396								-0.0458								kalinago
188	-0.0143	-0.017								-0.0706								kalinago
306	-0.0067	-0.0251								-0.063								kalinago
111	-0.0164	-0.0129								-0.0723								kalinago
189	-0.0145	-0.0157								-0.0682								kalinago
308	-0.0063	-0.0164								-0.058								kalinago
113	-0.0175	-0.0168								-0.0721								kalinago
198	-0.0145	-0.0209								-0.0721								kalinago
310	0.0123	-0.0437								-0.0436								kalinago
114	-0.0201	-0.0125								-0.0775								kalinago
205	0.009	-0.0347								-0.0442								kalinago
314	-0.0079	-0.023								-0.0603								kalinago
115	0.0201	-0.0447								-0.0356								kalinago
212	0.0149	-0.0395								-0.0342								kalinago
317	0.0165	-0.0431								-0.0384								kalinago
117	-0.0229	-0.0185								-0.0824								kalinago
213	-0.0108	-0.0208								-0.0655								kalinago
318	-0.0234	-0.011								-0.0813								kalinago
118	-0.0138	-0.0229								-0.0725								kalinago
230	-0.0131	-0.0193								-0.0646								kalinago
322	-0.0064	-0.0199								-0.0605								kalinago
119	-0.0216	-0.0131								-0.0778								kalinago
237	-0.011	-0.021								-0.0621								kalinago
337	0.0092	-0.0332								-0.0428								kalinago
120	0.0183	-0.0382								-0.0296								kalinago
238	-0.0156	-0.0195								-0.0686								kalinago
342	-0.0192	-0.0143								-0.0759								kalinago
121	-0.0081	-0.0259								-0.0591								kalinago
242	-0.0187	-0.0157								-0.0741								kalinago
343	0.0119	-0.0354								-0.0411								kalinago
122	0.0044	-0.0228								-0.0469								kalinago
245	-0.0123	-0.0133								-0.0643								kalinago
345	0.0463	-0.0686								-0.0055								kalinago
126	-0.0142	-0.0194								-0.0711								kalinago
246	-0.0292	-0.0106								-0.0886								kalinago
352	-0.0102	-0.0171								-0.0633								kalinago
127	-0.0209	-0.0203								-0.081								kalinago
253	-0.0149	-0.0192								-0.0715								kalinago
367	0.0091	-0.0405								-0.0443								kalinago
128	0.0086	-0.0329								-0.0439								kalinago
256	-0.0131	-0.0155								-0.068								kalinago
129	0.002	-0.0295								-0.0509								kalinago
258	0.0194	-0.0427								-0.0347								kalinago
371	-0.0267	-0.0098								-0.0833								kalinago
137	-0.0235	-0.0147								-0.081								kalinago
260	-0.0102	-0.0238								-0.0649								kalinago
372	-0.0083	-0.0194								-0.0639								kalinago
138	-0.0258	-0.01								-0.0828								kalinago
272	-0.0277	-0.0148								-0.0886								kalinago
376	-0.0248	-0.0147								-0.0871								kalinago
139	-0.0045	-0.0204								-0.0578								kalinago
274	-0.0126	-0.0179								-0.0708								kalinago
377	-0.0247	-0.0172								-0.0849								kalinago
140	0.0118	-0.0298								-0.0307								kalinago
380	-0.0148	-0.0181								-0.0695								kalinago
141	-0.0087	-0.0286								-0.0662								kalinago
284	-0.0266	-0.0133								-0.0711								kalinago
382	0.0107	-0.0367								-0.0424								kalinago
143	-0.0068	-0.0269								-0.061								kalinago
298	-0.0227	-0.0127								-0.0826								kalinago
393	-0.0135	-0.0207								-0.0703								kalinago
145	-0.0004	-0.0214								-0.0524								kalinago
303	-0.011	-0.0143								-0.0652								kalinago
398	-0.0145	-0.0184								-0.0689								kalinago
146	-0.023	-0.0162								-0.0767								kalinago
307	-0.0229	-0.0167								-0.082								kalinago
402	-0.0165	-0.0152								-0.0734								kalinago
149	-0.0192	-0.0172								-0.0736								kalinago
313	-0.012	-0.0219								-0.0656								kalinago
405	0.0058	-0.0294								-0.0479								kalinago
150	-0.021	-0.0177								-0.0791								kalinago
321	0.0097	-0.0325								-0.0428								kalinago
411	0.0148	-0.0368								-0.0382								kalinago
152	0.0057	-0.0302								-0.045								kalinago
325	0.0192	-0.0342								-0.0299								kalinago
412	-0.0278	-0.011								-0.0878								kalinago
154	-0.018	-0.018								-0.0753								kalinago
331	-0.0211	-0.0142								-0.079								kalinago
432	-0.0125	-0.0195								-0.0692								kalinago
155	-0.0057	-0.0277								-0.0614								kalinago
334	-0.0068	-0.0182								-0.0623								kalinago
433	0.0204	-0.0188								-0.0228								kalinago
157	0.0079	-0.0328								-0.0445								kalinago
336	-0.0136	-0.0157								-0.0703								kalinago
438	-0.0181	-0.0155								-0.0748								kalinago
158	0.0055	-0.0357								-0.0494								kalinago
358	-0.0102	-0.0252								-0.0694								kalinago
443	0.0223	-0.0395								-0.0296								kalinago
159	-0.0052	-0.0217								-0.0589								kalinago
361	-0.0174	-0.0178								-0.0764								kalinago
447	0.0194	-0.0443								-0.0335								kalinago
162	-0.0236	-0.0129								-0.0832								kalinago
369	-0.0277	-0.0104								-0.0865								kalinago
449	0.0198	-0.0441								-0.0324								kalinago
164	0.003	-0.029								-0.0483								kalinago
381	-0.0043	-0.0248								-0.0573								kalinago
456	-0.0158	-0.0163								-0.0711								kalinago
166	-0.0238	-0.0146								-0.0829								kalinago
389	-0.0137	-0.0198								-0.0691								kalinago
457	-0.0201	-0.0143								-0.0789								kalinago
167	-0.0185	-0.0192								-0.0755								kalinago
392	-0.0176	-0.019								-0.0762								kalinago
459	-0.0004	-0.0286								-0.049								kalinago
168	-0.0302	-0.0101								-0.0792								kalinago
394	0.0087	-0.0362								-0.0422								kalinago
461	0.0361	-0.0601								-0.0158								kalinago
169	-0.0005	-0.0248								-0.0572								kalinago
399	-0.0229	-0.014								-0.0796								kalinago
463	0.0004	-0.0252								-0.0435								kalinago
170	-0.0273	-0.0143								-0.0769								kalinago
451	-0.0131	-0.0156								-0.0685								kalinago
464	-0.0135	-0.0247								-0.06								kalinago
173	-0.0233	-0.0167								-0.082								kalinago
175	0.0171	-0.036								-0.0328								kalinago
176	-0.0126	-0.0179								-0.0653								kalinago
184	-0.0085	-0.016								-0.0651								kalinago
186	-0.0264	-0.0119								-0.0866								kalinago
190	-0.0126	-0.0173								-0.0692								kalinago
191	-0.0127	-0.0205								-0.0711								kalinago
193	-0.0156	-0.0223								-0.0745								kalinago
194	-0.001	-0.0288								-0.057								kalinago
195	-0.0046	-0.0268								-0.0587								kalinago
199	0.0002	-0.023								-0.0485								kalinago
200	0.0044	-0.034								-0.0494								kalinago
201	0.004	-0.0211								-0.0464								kalinago
202	0.0038	-0.0211								-0.0443								kalinago
206	-0.0211	-0.0134								-0.0777								kalinago
208	0.0192	-0.0281								-0.0255								kalinago
214	0.0305	-0.0374								-0.0151								kalinago
215	0.0082	-0.0272								-0.0443								kalinago
216	0.0068	-0.0276								-0.0477								kalinago
217	-0.0054	-0.0194								-0.0579								kalinago
218	0.0324	-0.0517								-0.0177								kalinago
219	-0.0109	-0.0209								-0.0625								kalinago
220	-0.01	-0.0217								-0.0655								kalinago
221	0.0269	-0.0458								-0.0224								kalinago
222	0.009	-0.0311								-0.0424								kalinago
223	-0.0022	-0.0282								-0.0564								kalinago
224	0.0028	-0.0219								-0.0473								kalinago
226	0.01	-0.0368								-0.0421								kalinago
227	0.0268	-0.0484								-0.0237								kalinago
228	-0.0049	-0.0255								-0.0604								kalinago
229	0.0174	-0.0425								-0.0312								kalinago
233	-0.0042	-0.0279								-0.0607								kalinago
234	0.0179	-0.0416								-0.0357								kalinago
235	-0.0107	-0.0182								-0.0645								kalinago
236	-0.0017	-0.0279								-0.0554								kalinago
240	-0.0071	-0.0202								-0.0583								kalinago
241	-0.0311	-0.0091								-0.0897								kalinago
243	-0.0009	-0.0205								-0.0521								kalinago
247	0.0006	-0.0291								-0.0538								kalinago
249	-0.015	-0.0149								-0.0695								kalinago
250	-0.011	-0.0209								-0.0674								kalinago
251	-0.0007	-0.0274								-0.0538								kalinago
254	0.0026	-0.0317								-0.0549								kalinago
257	-0.0064	-0.0181								-0.0575								kalinago
259	-0.0006	-0.0285								-0.0549								kalinago
261	-0.0161	-0.0186								-0.0718								kalinago
262	-0.0001	-0.0295								-0.0496								kalinago
264	0.0181	-0.0416								-0.0319								kalinago
265	0.0006	-0.0292								-0.0495								kalinago
266	-0.0041	-0.0214								-0.0448								kalinago
269	-0.0188	-0.0203								-0.0789								kalinago
271	-0.0269	-0.0147								-0.0879								kalinago
273	0.0038	-0.0203								-0.0463								kalinago
275	-0.0241	-0.0149								-0.083								kalinago
276	-0.002	-0.0205								-0.0527								kalinago
279	-0.0154	-0.0172								-0.0648								kalinago
283	-0.0209	-0.0155								-0.069								kalinago
285	0.0024	-0.0304								-0.0534								kalinago
286	0.0217	-0.0482								-0.033								kalinago
287	-0.0018	-0.0223								-0.0547								kalinago
288	-0.0117	-0.0126								-0.0635								kalinago
290	-0.0121	-0.0036								-0.036								kalinago
291	-0.0222	-0.0165								-0.0823								kalinago
292	-0.0124	-0.0162								-0.068								kalinago
293	0.0166	-0.0293								-0.0308								kalinago
294	0.0022	-0.0187								-0.0483								kalinago
295	0.01	-0.0337								-0.0449								kalinago
304	-0.0096	-0.022								-0.0675								kalinago
305	-0.0118	-0.0242								-0.0672								kalinago
311	-0.0099	-0.0254								-0.0595								kalinago
312	-0.0009	-0.0224								-0.0524								kalinago
315	-0.0165	-0.0196								-0.0739								kalinago
316	-0.0014	-0.019								-0.0517								kalinago
319	-0.0169	-0.0123								-0.0747								kalinago
320	0.018	-0.0406								-0.0348								kalinago
323	-0.02	-0.0147								-0.0782								kalinago
324	0.0032	-0.0166								-0.0459								kalinago
326	0.0219	-0.0255								-0.0234								kalinago
327	-0.0113	-0.0202								-0.0656								kalinago
328	-0.0004	-0.026								-0.0525								kalinago
330	0.0079	-0.0225								-0.0408								kalinago
332	0.0109	-0.0316								-0.0425								kalinago
333	0.0152	-0.0362								-0.0317								kalinago
335	0.0186	-0.0416								-0.036								kalinago
338	-0.0112	-0.0159								-0.0656								kalinago
339	-0.0234	-0.0038								-0.0775								kalinago
341	0.0248	-0.0389								-0.0231								kalinago
344	0.0085	-0.0189								-0.0368								kalinago
346	-0.0155	-0.0153								-0.0722								kalinago
348	-0.0057	-0.0214								-0.0582								kalinago
349	-0.0175	-0.0122								-0.0733								kalinago
350	-0.0186	-0.0135								-0.074								kalinago
351	-0.0221	-0.0043								-0.0782								kalinago
353	-0.0305	-0.0044								-0.0877								kalinago
355	-0.0261	-0.0063								-0.0839								kalinago
357	-0.006	-0.0203								-0.06								kalinago
359	-0.013	-0.0221								-0.0705								kalinago
360	-0.0106	-0.0159								-0.0643								kalinago
363	0.0106	-0.0341								-0.0431								kalinago
364	-0.0172	-0.0148								-0.0721								kalinago
365	-0.0285	-0.0128								-0.0854								kalinago
366	-0.009	-0.0218								-0.0619								kalinago
373	-0.0072	-0.0249								-0.0627								kalinago
374	0.0006	-0.0316								-0.0545								kalinago
378	0.0054	-0.0225								-0.0444								kalinago
379	0.0052	-0.026								-0.0474								kalinago
383	-0.016	-0.0196								-0.074								kalinago
384	-0.0165	-0.0156								-0.0726								kalinago
385	-0.0148	-0.0194								-0.0714								kalinago
386	-0.0136	-0.0208								-0.0705								kalinago
387	-0.021	-0.0156								-0.0813								kalinago
388	-0.0296	-0.0128								-0.0893								kalinago
390	-0.009	-0.0111								-0.058								kalinago
391	-0.0156	-0.0189								-0.0721								kalinago
395	-0.0149	-0.0175								-0.0716								kalinago
396	0.0052	-0.0307								-0.048								kalinago
397	-0.0115	-0.0165								-0.067								kalinago
401	-0.0125	-0.0248								-0.0685								kalinago
403	0.0051	-0.0282								-0.047								kalinago
404	0.0085	-0.0355								-0.0465								kalinago
406	-0.0159	-0.0203								-0.0691								kalinago
408	-0.0042	-0.0282								-0.0597								kalinago
409	-0.0033	-0.026								-0.0588								kalinago
410	-0.0055	-0.0243								-0.0624								kalinago
413	-0.0022	-0.0267								-0.0569								kalinago
414	-0.015	-0.0179								-0.0729								kalinago
415	0.0009	-0.0273								-0.0508								kalinago
416	-0.0058	-0.0152								-0.061								kalinago
417	0.0062	-0.0208								-0.0421								kalinago
418	-0.0098	-0.0171								-0.0629								kalinago
420	-0.0229	-0.012								-0.0817								kalinago
421	-0.0204	-0.0149								-0.0799								kalinago
422	-0.0102	-0.0119								-0.0616								kalinago
423	-0.0036	-0.0276								-0.059								kalinago
424	-0.0227	-0.0154								-0.0821								kalinago
425	0.002	-0.0301								-0.0548								kalinago
426	-0.0169	-0.0199								-0.074								kalinago
427	-0.0116	-0.0225								-0.0669								kalinago
428	-0.0132	-0.0203								-0.0699								kalinago
429	-0.0162	-0.0128								-0.0731								kalinago
430	-0.0177	-0.0201								-0.0698								kalinago
431	-0.0204	-0.0143								-0.0776								kalinago
434	0.0112	-0.0253								-0.038								kalinago
436	-0.0063	-0.0214								-0.0588								kalinago
437	0.0158	-0.037								-0.0357								kalinago
439	0.0096	-0.0323								-0.041								kalinago
440	0.001	-0.0262								-0.047								kalinago
441	-0.0017	-0.0274								-0.0486								kalinago
446	-0.0035	-0.0253								-0.0575								kalinago
448	-0.0149	-0.0152								-0.0705								kalinago
450	-0.0102	-0.0214								-0.0681								kalinago
452	0.007	-0.0283								-0.0404								kalinago
453	-0.0191	-0.0138								-0.0764								kalinago
454	-0.0143	-0.0174								-0.067								kalinago
455	-0.0315	-0.0046								-0.0872								kalinago
458	-0.0086	-0.0194								-0.0615								kalinago
460	-0.0151	-0.0227								-0.0746								kalinago
462	-0.0079	-0.0201								-0.0643								kalinago
13	-0.0184	-0.0149								-0.076								kalinago
17	0.0118	-0.0303								-0.0372								kalinago
18	-0.0256	-0.0117								-0.0851								kalinago
277	-0.0242	-0.0161								-0.0838								kalinago
368	-0.0374	-0.008								-0.0958								kalinago
23	-0.032	-0.0088								-0.091								kalinago
24	-0.0068	-0.0248								-0.0611								kalinago
28	-0.0037	-0.0289								-0.0615								kalinago
93	-0.0157	-0.0178								-0.0729								kalinago
174	0.0051	-0.0207								-0.0442								kalinago
177	-0.0047	-0.023								-0.0589								kalinago
179	0.0118	-0.0369								-0.0424								kalinago
180	-0.0321	-0.0063								-0.0904								kalinago
181	-0.0168	-0.0142								-0.0761								kalinago
182	0.0044	-0.0299								-0.0506								kalinago
183	0.0034	-0.0323								-0.0518								kalinago
197	-0.0185	-0.0158								-0.0762								kalinago
209	0.024	-0.0437								-0.0271								kalinago
400	-0.016	-0.0189								-0.0725								kalinago

## Sheet: Fig 2 - S2
report	iid	fid_iid	AFR	EAS	EUR	NAM		amr/(amr+afr)
C	325	84_325	0.521393	0.001173	0.222511	0.254923	0	0.328375
C	158	88_158	0.472912	0.006695	0.08506	0.435333	0	0.479312
C	108	57_108	0.358411	1e-05	0.164622	0.476957	0	0.570954
C	312	168_312	0.344062	0.005607	0.171155	0.479176	0	0.582063
C	446	248_446	0.351925	0.011289	0.118917	0.517869	0	0.595393
C	195	106_195	0.352731	0.018454	0.097736	0.531079	0	0.600897
C	87	43_87	0.335561	1e-05	0.116354	0.548075	0	0.62025
C	121	68_121	0.332854	0.038597	0.07686	0.551689	0	0.623699
C	306	59_306	0.341056	0.000622	0.089792	0.56853	0	0.625043
C	10	31_10	0.32563	1e-05	0.128649	0.545712	0	0.626289
C	147	54_147	0.297724	0.07363	0.063428	0.565218	0	0.65499
C	464	96_464	0.295779	0.086747	0.050434	0.56704	0	0.657195
C	334	86_334	0.286782	1e-05	0.152854	0.560354	0	0.661469
C	308	60_308	0.268943	1e-05	0.194834	0.536213	0	0.665974
C	237	66_237	0.286296	0.032355	0.102837	0.578512	0	0.668948
C	219	119_219	0.284729	0.028518	0.102614	0.584138	0	0.672299
C	20	10_20	0.274053	0.001873	0.117459	0.606615	0	0.688812
C	230	65_230	0.261609	0.031314	0.104493	0.602585	0	0.69728
C	432	85_432	0.262803	0.012077	0.104973	0.620147	0	0.702358
C	389	92_389	0.266123	0.009823	0.089109	0.634945	0	0.704658
C	102	52_102	0.261632	0.003401	0.107413	0.627554	0	0.705762
C	198	61_198	0.267562	0.000766	0.071095	0.660577	0	0.711722
C	190	102_190	0.251181	1e-05	0.11818	0.630629	0	0.715153
C	53	39_53	0.257844	1e-05	0.093478	0.648668	0	0.715565
C	126	70_126	0.25657	0.002512	0.090746	0.650173	0	0.717042
C	442	28_442	0.215363	0.013646	0.219037	0.551953	0	0.719329
C	303	80_303	0.232127	1e-05	0.171933	0.59593	0	0.719673
C	380	77_380	0.240822	0.021819	0.104591	0.632768	0	0.724331
C	56	26_56	0.244737	1e-05	0.107811	0.647442	0	0.725686
C	256	72_256	0.232052	0.004237	0.139933	0.623779	0	0.728858
C	383	204_383	0.250857	0.00099	0.07193	0.676223	0	0.729412
C	391	211_391	0.244706	0.008534	0.084063	0.662698	0	0.730323
C	245	69_245	0.217016	0.015235	0.178576	0.589172	0	0.730812
C	58	40_58	0.232808	1e-05	0.12454	0.642642	0	0.73407
C	336	87_336	0.230911	1e-05	0.131672	0.637407	0	0.734071
C	288	158_288	0.212917	0.005511	0.188974	0.592598	0	0.735676
C	189	60_189	0.228775	0.006918	0.127181	0.637127	0	0.735796
C	27	36_27	0.23902	0.011173	0.068652	0.681155	0	0.740245
C	456	91_456	0.22603	0.003138	0.11316	0.657671	0	0.744223
C	448	249_448	0.218741	1e-05	0.129295	0.651953	0	0.748774
C	167	93_167	0.234617	0.004103	0.047435	0.713845	0	0.752634
C	94	46_94	0.218259	1e-05	0.082254	0.699477	0	0.762177
C	111	60_111	0.195772	1e-05	0.134863	0.669355	0	0.773707
C	350	189_350	0.190344	0.011418	0.121622	0.676615	0	0.780446
C	142	29_142	0.1878	0.011172	0.131369	0.669659	0	0.780981
C	117	64_117	0.207475	0.01236	0.026131	0.754034	0	0.784219
C	323	173_323	0.193303	1e-05	0.086518	0.720169	0	0.788387
C	61	29_61	0.194776	0.007999	0.066576	0.73065	0	0.789528
C	431	240_431	0.188218	0.003917	0.093502	0.714363	0	0.791467
C	206	112_206	0.179131	1e-05	0.094444	0.726415	0	0.802185
C	277	261_277	0.181125	0.00719	0.042772	0.768913	0	0.80935
C	399	95_399	0.170607	0.017952	0.080533	0.730908	0	0.810755
C	275	151_275	0.171167	0.003673	0.05584	0.769319	0	0.818002
C	376	75_376	0.169822	1e-05	0.036528	0.79364	0	0.823738
C	420	229_420	0.15864	1e-05	0.089868	0.751482	0	0.825694
C	318	64_318	0.146949	1e-05	0.093689	0.759352	0	0.837859
C	160	56_160	0.153175	0.015414	0.030896	0.800515	0	0.839387
C	272	75_272	0.154538	0.012967	0.019327	0.813168	0	0.840305
C	18	260_18	0.143581	0.001347	0.074452	0.78062	0	0.844643
C	82	42_82	0.146409	0.012423	0.037954	0.803214	0	0.845824
C	186	101_186	0.14368	0.00346	0.057684	0.795175	0	0.846963
C	8	2_8	0.118129	0.139326	0.066469	0.676076	0	0.851261
C	86	44_86	0.139353	0.005752	0.051076	0.803819	0	0.852251
C	2	1_2	0.124968	0.013721	0.072136	0.789175	0	0.863295
C	412	84_412	0.127048	0.003947	0.060289	0.808716	0	0.864231
C	109	58_109	0.127368	0.008674	0.050533	0.813424	0	0.864616
C	369	90_369	0.123272	0.007286	0.070995	0.798446	0	0.866258
C	123	24_123	0.114752	0.016013	0.06731	0.801925	0	0.874817
C	246	70_246	0.116628	0.006607	0.060637	0.816129	0	0.874964
C	351	190_351	0.097542	0.003132	0.185892	0.713434	0	0.879723
C	172	58_172	0.076095	0.021845	0.032671	0.869389	0	0.919517
C	368	262_368	0.054831	0.032529	0.020618	0.892022	0	0.942091		0.22545	0.0116815	0.0977755	0.665093	'Carib'	n=72
			0	0	0	0	1	0		AFR	EAS	EUR	AMR
M	89	20_89	0.688203	1e-05	0.246519	0.065268	0	0.0866231		0.338967	0.0129066	0.138642	0.509485	'Mixed'	n=36
M	83	43_83	0.62318	1e-05	0.171662	0.205148	0	0.247665
M	130	49_130	0.574605	0.011704	0.182303	0.231389	0	0.287085		0.318341	0.0111475	0.121933	0.548579	grand total	n=458
M	286	156_286	0.641295	0.000617	0.086124	0.271964	0	0.297795
M	433	86_433	0.408222	1e-05	0.398604	0.193163	0	0.321197
M	212	63_212	0.54404	0.025777	0.131048	0.299135	0	0.354772
M	267	46_267	0.515539	0.001906	0.152788	0.329768	0	0.390116
M	310	61_310	0.565061	0.00914	0.053531	0.372268	0	0.397158
M	17	259_17	0.460408	0.011115	0.198742	0.329735	0	0.417311
M	295	164_295	0.477365	1e-05	0.141266	0.381359	0	0.4441
M	205	62_205	0.479182	0.003874	0.12776	0.389183	0	0.448179
M	417	227_417	0.362742	0.001708	0.253653	0.381896	0	0.512861
M	39	8_39	0.316236	1e-05	0.277707	0.406048	0	0.562172
M	294	163_294	0.323262	1e-05	0.241748	0.43498	0	0.573669
M	287	157_287	0.33405	0.003387	0.168076	0.494487	0	0.596819
M	329	19_329	0.281384	0.055942	0.189742	0.472932	0	0.626968
M	159	89_159	0.314514	0.005071	0.147292	0.533123	0	0.628952
M	358	88_358	0.317649	0.003078	0.058633	0.62064	0	0.661459
M	372	74_372	0.28241	1e-05	0.135582	0.581998	0	0.673291
M	220	120_220	0.291648	0.002248	0.104011	0.602094	0	0.673678
M	327	176_327	0.27733	0.010213	0.10757	0.604887	0	0.685644
M	235	131_235	0.263316	0.010612	0.13509	0.590983	0	0.691775
M	104	54_104	0.233437	0.052353	0.168387	0.545823	0	0.700438
M	386	207_386	0.268257	0.003249	0.076396	0.652098	0	0.708529
M	161	57_161	0.258315	1e-05	0.109565	0.63211	0	0.709897
M	92	45_92	0.24669	1e-05	0.112842	0.640458	0	0.721929
M	385	206_385	0.254597	1e-05	0.07958	0.665813	0	0.723387
M	361	89_361	0.229085	1e-05	0.072968	0.697937	0	0.752881
M	3	1_3	0.208447	0.00486	0.136201	0.650492	0	0.75732
M	197	300_197	0.211557	1e-05	0.088484	0.699949	0	0.767904
M	242	68_242	0.208625	0.007049	0.092647	0.691679	0	0.768273
M	283	154_283	0.187971	0.071914	0.086039	0.654075	0	0.776769
M	284	78_284	0.137102	0.117457	0.067343	0.678098	0	0.831818
M	232	15_232	0.154157	0.00949	0.059622	0.776731	0	0.834398
M	365	198_365	0.137324	0.025651	0.042025	0.795	0	0.852708
M	138	75_138	0.125599	0.016104	0.089566	0.768731	0	0.859561
