# Supplementary material for: Native American genetic ancestry and pigmentation allele contributions to skin color in a Caribbean population
Source: eLife. 2023 Jun 9;12:e77514. doi: 10.7554/eLife.77514 (PMC10371226; doi:10.7554/eLife.77514)
Supplement: Figure 4—source data 1. [file elife-77514-fig4-data1.xlsx]

## Sheet: Sheet1
fid	iid	EAS	AFR	AMR	EUR	MI
1	2	0.013721	0.124968	0.789175	0.072136	40.9429
1	3	0.00486	0.208447	0.650492	0.136201	39.9033
2	4	0.015787	0.130498	0.846787	0.006927	49.4974
3	5	1e-05	0.215436	0.686602	0.097952	45.1976
5	7	1e-05	0.264411	0.657739	0.07784	42.7009
2	9	1e-05	0.51307	0.347722	0.139198	54.0681
31	10	1e-05	0.32563	0.545712	0.128649	52.9404
6	11	0.122794	0.054267	0.78851	0.03443	37.8665
3	14	0.013528	0.189905	0.731345	0.065222	35.0268
8	16	1e-05	0.153121	0.766014	0.080856	44.6811
259	17	0.011115	0.460408	0.329735	0.198742	50.6502
260	18	0.001347	0.143581	0.78062	0.074452	41.4906
9	19	1e-05	0.326884	0.491912	0.181194	52.38
11	21	0.011571	0.307654	0.554579	0.126197	49.2186
4	22	0.010005	0.22706	0.733243	0.029692	39.8622
289	23	0.018306	0.087412	0.843412	0.05087	43.288
290	24	0.013894	0.333677	0.554997	0.097431	50.9926
5	26	0.02262	0.148932	0.785087	0.043361	39.8743
36	27	0.011173	0.23902	0.681155	0.068652	39.38
14	30	0.006594	0.296031	0.633305	0.06407	51.4432
7	33	0.166784	0.065988	0.703922	0.063306	39.3172
3	35	0.113777	0.203809	0.590873	0.091541	36.1778
17	36	1e-05	0.292732	0.566638	0.14062	52.2936
18	37	1e-05	0.323339	0.492467	0.184183	53.4297
19	38	1e-05	0.161351	0.776952	0.061688	42.8811
8	39	1e-05	0.316236	0.406048	0.277707	63.9482
9	40	0.008993	0.418488	0.458682	0.113838	58.1232
4	42	0.000309	0.292812	0.542173	0.164705	33.5229
10	43	1e-05	0.291408	0.548389	0.160192	53.9065
11	44	1e-05	0.541698	0.393679	0.064614	71.943
37	47	0.01625	0.259424	0.641802	0.082524	50.6955
12	48	0.001972	0.836327	0.008301	0.153401	62.4362
13	49	1e-05	0.433299	0.46891	0.097781	36.0583
38	50	0.004571	0.532074	0.367464	0.095891	68.5993
14	51	1e-05	0.335432	0.572812	0.091746	63.0743
39	53	1e-05	0.257844	0.648668	0.093478	47.1854
25	55	1e-05	0.22337	0.672888	0.103731	44.3053
26	56	1e-05	0.244737	0.647442	0.107811	47.0797
27	57	1e-05	0.227134	0.697656	0.0752	46.6535
5	62	1e-05	0.193559	0.76887	0.037562	40.7403
6	64	1e-05	0.365696	0.52601	0.108284	56.7831
16	65	0.007522	0.50398	0.417478	0.07102	57.9912
31	66	0.017337	0.150032	0.797233	0.035397	47.0414
32	67	0.013352	0.296519	0.611058	0.079071	47.2087
17	68	1e-05	0.396325	0.564719	0.038946	38.6427
34	71	0.078065	0.172121	0.688118	0.061695	42.5416
37	74	0.000368	0.213626	0.660977	0.125029	46.0829
38	75	1e-05	0.352525	0.499458	0.148007	44.9218
40	77	0.037161	0.249779	0.619858	0.093201	41.2256
42	82	0.012423	0.146409	0.803214	0.037954	39.1512
18	84	0.005708	0.367277	0.498094	0.128921	55.0178
19	85	0.010311	0.140734	0.786896	0.062059	39.4742
44	86	0.005752	0.139353	0.803819	0.051076	42.9406
43	87	1e-05	0.335561	0.548075	0.116354	50.2055
44	88	1e-05	0.48752	0.331002	0.181469	51.6184
20	89	1e-05	0.688203	0.065268	0.246519	63.5432
21	90	1e-05	0.515748	0.301354	0.182887	54.1854
45	91	1e-05	0.148172	0.768932	0.082885	46.0129
46	95	1e-05	0.452133	0.320129	0.227728	49.5491
49	98	0.002129	0.401289	0.440719	0.155863	45.608
50	99	0.003641	0.382163	0.484298	0.129898	45.928
51	100	0.010217	0.393286	0.456146	0.140351	46.9787
47	101	0.005822	0.154711	0.802657	0.036811	40.7651
52	102	0.003401	0.261632	0.627554	0.107413	43.6816
54	104	0.052353	0.233437	0.545823	0.168387	39.0893
55	105	0.000786	0.246105	0.606492	0.146618	44.5003
56	106	0.020492	0.172158	0.700469	0.10688	49.6725
48	107	0.015135	0.218976	0.742822	0.023067	41.7628
57	108	1e-05	0.358411	0.476957	0.164622	42.54
60	111	1e-05	0.195772	0.669355	0.134863	42.9378
22	112	1e-05	0.20541	0.697458	0.097122	41.2099
61	113	0.018764	0.222647	0.671045	0.087545	45.9082
62	114	1e-05	0.178712	0.711662	0.109616	46.3273
63	115	1e-05	0.609472	0.287513	0.103005	44.2113
23	116	1e-05	0.232421	0.687485	0.080084	54.7444
64	117	0.01236	0.207475	0.754034	0.026131	44.2919
65	118	0.002798	0.285392	0.660775	0.051035	37.5217
66	119	0.009648	0.174947	0.723616	0.091789	41.5598
67	120	0.027065	0.545139	0.255892	0.171904	48.0865
68	121	0.038597	0.332854	0.551689	0.07686	42.5468
69	122	1e-05	0.369055	0.419853	0.211081	49.2637
24	123	0.016013	0.114752	0.801925	0.06731	39.8421
25	124	0.091852	0.268614	0.582819	0.056715	39.3842
26	125	0.022631	0.441267	0.454835	0.081268	58.04
70	126	0.002512	0.25657	0.650173	0.090746	48.0746
71	127	0.010832	0.228704	0.737803	0.022661	45.6747
72	128	0.00589	0.465918	0.383252	0.14494	47.9236
73	129	0.00748	0.407659	0.461825	0.123037	46.9819
49	130	0.011704	0.574605	0.231389	0.182303	59.2438
50	131	1e-05	0.207106	0.639401	0.153483	38.5982
53	134	0.024994	0.193067	0.72311	0.058828	50.4204
28	136	1e-05	0.308394	0.588654	0.102941	54.1428
74	137	0.01398	0.172627	0.753997	0.059396	50.9738
75	138	0.016104	0.125599	0.768731	0.089566	53.3513
76	139	0.001472	0.310892	0.524492	0.163144	42.3484
77	140	0.042744	0.459291	0.293122	0.204844	53.7153
29	142	0.011172	0.1878	0.669659	0.131369	36.4611
79	143	0.013333	0.350085	0.565459	0.071124	50.0904
30	144	0.007213	0.26651	0.646236	0.080041	38.6782
81	146	0.041995	0.186975	0.717087	0.053943	48.6849
54	147	0.07363	0.297724	0.565218	0.063428	41.5007
31	148	0.002445	0.334775	0.53997	0.12281	40.4266
55	151	0.011692	0.545254	0.255702	0.187352	61.9491
84	152	0.011464	0.432956	0.408812	0.146769	51.0481
32	153	0.016793	0.251018	0.656079	0.07611	40.3587
85	154	0.003941	0.231379	0.697936	0.066744	45.5719
87	157	0.004975	0.462484	0.392823	0.139718	44.3811
9	163	1e-05	0.165183	0.798688	0.036119	47.728
91	164	0.015251	0.407769	0.436379	0.140601	47.1509
34	165	0.011042	0.36732	0.432498	0.189141	74.8486
92	166	0.006116	0.175835	0.759759	0.05829	49.2219
94	168	0.078889	0.100208	0.764682	0.056221	46.6418
95	169	1e-05	0.359892	0.499566	0.140532	56.9513
35	171	1e-05	0.224783	0.706728	0.068479	39.5548
58	172	0.021845	0.076095	0.869389	0.032671	41.6596
293	174	0.002454	0.352562	0.400032	0.244953	49.988
294	177	0.006131	0.327288	0.532664	0.133918	45.8207
295	179	0.001648	0.508214	0.362177	0.127962	45.7707
296	180	0.012514	0.063138	0.846882	0.077466	47.4431
100	184	1e-05	0.25343	0.579229	0.167331	42.0399
101	186	0.00346	0.14368	0.795175	0.057684	37.3184
36	187	0.006985	0.298679	0.544779	0.149557	41.3264
60	189	0.006918	0.228775	0.637127	0.127181	43.3488
103	191	1e-05	0.269378	0.647852	0.08276	50.6315
12	192	1e-05	0.243964	0.648347	0.107679	54.6513
105	194	1e-05	0.391624	0.512684	0.095683	42.4685
37	196	0.002251	0.306238	0.586028	0.105484	56.3786
300	197	1e-05	0.211557	0.699949	0.088484	44.1621
61	198	0.000766	0.267562	0.660577	0.071095	41.9216
108	200	0.012679	0.452195	0.441756	0.093369	47.278
38	204	0.012868	0.620312	0.213441	0.15338	58.817
301	209	1e-05	0.618458	0.226736	0.154796	49.6673
40	211	1e-05	0.52499	0.123336	0.351664	65.9921
116	216	1e-05	0.417533	0.417418	0.165039	42.8227
117	217	0.006003	0.297147	0.528759	0.168092	47.6215
119	219	0.028518	0.284729	0.584138	0.102614	44.2991
126	227	0.013095	0.66739	0.189186	0.130329	47.3868
127	228	1e-05	0.347319	0.553498	0.099173	42.9269
14	231	0.004248	0.512387	0.386497	0.096868	58.4622
15	232	0.00949	0.154157	0.776731	0.059622	57.788
130	234	1e-05	0.573934	0.302541	0.123516	49.1801
66	237	0.032355	0.286296	0.578512	0.102837	53.3883
67	238	0.035717	0.249593	0.633842	0.080848	55.6844
41	239	0.031573	0.296547	0.558289	0.11359	55.585
133	240	0.029612	0.294948	0.529142	0.146298	54.4102
68	242	0.007049	0.208625	0.691679	0.092647	45.3791
135	243	0.003722	0.325266	0.476564	0.194449	53.519
42	244	0.020761	0.18384	0.650559	0.14484	53.0046
70	246	0.006607	0.116628	0.816129	0.060637	50.7665
136	247	0.007192	0.397396	0.477895	0.117518	54.7599
138	250	0.008331	0.283522	0.609985	0.098162	45.2882
44	252	0.086598	0.313105	0.438868	0.161429	38.3254
45	255	0.000629	0.47539	0.418558	0.105422	50.2504
141	257	0.010826	0.282009	0.535944	0.171222	41.4276
73	258	1e-05	0.588094	0.284914	0.126981	45.6436
74	260	0.006454	0.310374	0.604767	0.078405	43.7811
16	263	1e-05	0.489905	0.376506	0.133579	56.6684
145	264	0.013223	0.574913	0.284745	0.127119	52.3206
146	265	0.035858	0.397337	0.449546	0.117259	45.4879
147	266	0.092982	0.310308	0.426031	0.170679	52.2815
46	267	0.001906	0.515539	0.329768	0.152788	62.3182
47	268	0.041869	0.411448	0.457587	0.089096	56.2418
149	271	0.006103	0.156961	0.79985	0.037086	45.1416
75	272	0.012967	0.154538	0.813168	0.019327	39.9335
76	274	1e-05	0.248902	0.638291	0.112797	37.2995
151	275	0.003673	0.171167	0.769319	0.05584	43.5742
17	278	0.005511	0.340468	0.535567	0.118454	32.5394
49	280	0.034346	0.297293	0.500796	0.167564	46.5863
50	281	0.001273	0.194378	0.70874	0.095608	35.8818
51	282	0.009244	0.251245	0.700842	0.038669	35.6095
154	283	0.071914	0.187971	0.654075	0.086039	38.2699
157	287	0.003387	0.33405	0.494487	0.168076	50.5435
158	288	0.005511	0.212917	0.592598	0.188974	49.492
159	290	0.183291	0.114904	0.385253	0.316552	60.7543
162	293	1e-05	0.474743	0.276235	0.249012	60.828
163	294	1e-05	0.323262	0.43498	0.241748	43.3049
164	295	1e-05	0.477365	0.381359	0.141266	49.9933
53	296	0.00426	0.196862	0.720765	0.078114	49.8395
54	297	0.008519	0.477805	0.374779	0.138897	67.9474
79	298	1e-05	0.16019	0.748139	0.091661	45.028
55	299	0.004519	0.427297	0.413504	0.15468	60.7408
56	300	1e-05	0.273582	0.607412	0.118996	38.3526
57	301	1e-05	0.457273	0.391344	0.151372	56.2227
58	302	1e-05	0.378541	0.533203	0.088246	59.5846
80	303	1e-05	0.232127	0.59593	0.171933	37.6392
165	304	1e-05	0.2995	0.605254	0.095236	52.1627
59	306	0.000622	0.341056	0.56853	0.089792	55.0574
81	307	0.00277	0.195498	0.761551	0.040182	48.124
60	308	1e-05	0.268943	0.536213	0.194834	37.3091
168	312	0.005607	0.344062	0.479176	0.171155	49.7949
82	313	0.030739	0.283377	0.599414	0.08647	46.0538
62	314	0.029705	0.312723	0.546518	0.111054	42.0521
169	315	0.001102	0.24862	0.684146	0.066132	58.1251
170	316	1e-05	0.318501	0.482397	0.199093	42.7003
63	317	0.000199	0.578843	0.323119	0.09784	57.6121
64	318	1e-05	0.146949	0.759352	0.093689	47.6259
171	319	1e-05	0.188604	0.674473	0.136914	58.747
172	320	1e-05	0.56749	0.294246	0.138253	47.3568
65	322	0.003035	0.292908	0.550536	0.153521	57.7596
174	324	1e-05	0.314777	0.415224	0.269989	48.6992
177	328	0.012986	0.369314	0.47676	0.14094	50.3659
86	334	1e-05	0.286782	0.560354	0.152854	46.669
181	335	1e-05	0.578404	0.299076	0.12251	53.7536
87	336	1e-05	0.230911	0.637407	0.131672	34.6696
67	342	0.003832	0.192794	0.702029	0.101345	44.0263
68	343	1e-05	0.498003	0.356538	0.14545	53.055
185	344	0.01361	0.351751	0.337534	0.297106	58.5667
69	345	0.004263	0.916625	1e-05	0.079102	79.6638
186	346	0.001018	0.220309	0.658969	0.119704	53.1433
187	348	0.001653	0.306942	0.548806	0.142598	48.4702
188	349	0.007791	0.181373	0.669548	0.141287	44.846
189	350	0.011418	0.190344	0.676615	0.121622	41.4039
190	351	0.003132	0.097542	0.713434	0.185892	44.4212
70	352	0.009648	0.255789	0.581599	0.152965	49.9362
191	353	0.005744	0.057822	0.82677	0.109663	44.2098
193	357	1e-05	0.301119	0.548953	0.149918	41.4342
194	359	0.006552	0.280051	0.645143	0.068254	50.2333
89	361	1e-05	0.229085	0.697937	0.072968	45.5647
196	363	1e-05	0.482787	0.375916	0.141287	60.0594
198	365	0.025651	0.137324	0.795	0.042025	46.7055
71	367	0.013127	0.53125	0.398964	0.056659	51.3158
262	368	0.032529	0.054831	0.892022	0.020618	46.044
73	371	0.020013	0.118173	0.775731	0.086083	41.8082
74	372	1e-05	0.28241	0.581998	0.135582	62.0127
200	373	0.003813	0.332603	0.570842	0.092742	41.9708
201	374	0.002985	0.419112	0.491469	0.086433	39.9796
75	376	1e-05	0.169822	0.79364	0.036528	40.8481
76	377	0.01613	0.188228	0.771519	0.024123	56.2216
77	380	0.021819	0.240822	0.632768	0.104591	56.2711
78	382	0.004909	0.503714	0.372567	0.11881	58.8116
204	383	0.00099	0.250857	0.676223	0.07193	45.7815
208	387	1e-05	0.195165	0.740857	0.063968	45.3723
209	388	0.01566	0.129364	0.821473	0.033502	51.5296
92	389	0.009823	0.266123	0.634945	0.089109	49.4711
211	391	0.008534	0.244706	0.662698	0.084063	48.3768
79	393	0.004423	0.273785	0.642147	0.079645	38.1472
212	395	0.006673	0.236957	0.649483	0.106887	51.6324
213	396	0.00189	0.431889	0.43091	0.135311	43.6908
214	397	1e-05	0.245741	0.613676	0.140572	52.9783
80	398	0.008329	0.245696	0.646884	0.099091	40.7925
95	399	0.017952	0.170607	0.730908	0.080533	41.4438
216	401	0.020867	0.303457	0.620175	0.055501	48.047
81	402	1e-05	0.215862	0.669313	0.114816	39.2688
218	404	1e-05	0.486655	0.408493	0.104843	46.5033
82	405	1e-05	0.429725	0.425768	0.144496	72.2295
219	406	0.031388	0.255087	0.645457	0.068069	44.464
220	408	0.008808	0.369014	0.539811	0.082367	50.23
221	409	0.002341	0.357926	0.526886	0.112846	53.3254
83	411	1e-05	0.527082	0.327754	0.145154	58.6652
84	412	0.003947	0.127048	0.808716	0.060289	36.8668
224	414	0.004937	0.239691	0.651818	0.103554	51.4515
225	415	0.010256	0.384965	0.466053	0.138725	48.9925
226	416	1e-05	0.258627	0.544295	0.197068	45.3278
228	418	0.009157	0.25607	0.579403	0.15537	41.6191
229	420	1e-05	0.15864	0.751482	0.089868	48.4947
230	421	1e-05	0.191611	0.735681	0.072699	46.0873
231	422	0.004022	0.21475	0.572169	0.209059	40.797
238	429	1e-05	0.193947	0.66543	0.140612	41.9125
239	430	0.042223	0.243466	0.654478	0.059833	49.2277
240	431	0.003917	0.188218	0.714363	0.093502	41.734
85	432	0.012077	0.262803	0.620147	0.104973	57.5706
87	438	0.003513	0.207989	0.687776	0.100722	38.2908
245	439	0.009025	0.462517	0.372089	0.156369	42.8267
246	440	0.039284	0.377387	0.428934	0.154395	45.2497
88	443	1e-05	0.578685	0.244949	0.176356	69.3011
249	448	1e-05	0.218741	0.651953	0.129295	41.8213
250	450	1e-05	0.287251	0.612633	0.100106	51.2468
252	453	0.000856	0.187919	0.700821	0.110403	46.0187
93	459	0.042109	0.391824	0.45302	0.113047	39.9167
256	460	0.003264	0.276153	0.675637	0.044947	46.362
94	461	0.007612	0.802978	0.110833	0.078577	74.7594
95	463	0.064241	0.3653	0.405895	0.164564	39.2792
96	464	0.086747	0.295779	0.56704	0.050434	38.7541
253	454	0.017942	0.241707	0.631758	0.108592	40.928
254	455	0.018859	0.056219	0.823576	0.101346	51.5299
91	456	0.003138	0.22603	0.657671	0.11316	36.9339
92	457	1e-05	0.190288	0.721232	0.088469	39.4353
62	205	0.003874	0.479182	0.389183	0.12776	53.3712
24	362	0.00401	0.68494	0.019913	0.291136	57.8042
