# Supplementary material for: Native American genetic ancestry and pigmentation allele contributions to skin color in a Caribbean population
Source: eLife. 2023 Jun 9;12:e77514. doi: 10.7554/eLife.77514 (PMC10371226; doi:10.7554/eLife.77514)
Supplement: Figure 4—source data 2. [file elife-77514-fig4-data2.xlsx]

## Sheet: Histogram
range	label	triple_anc		L374F_1	L374F_2		alb_1	alb_2		A111T_1	A111T_2
20-25	20	0		0	0		0	3		1	0
25-30	25	0		0	0		0			3	0
30-35	30	3		2	1		4			15	3
35-40	35	38		10	1		5			36	1
40-45	40	65		14	1		6			33	1
45-50	45	74		6			6			20
50-55	50	48		4			2			6
55-60	55	28		4						4
60-65	60	11		2						0
65-70	65	4		0						0
70-75	70	4		1						0
75-80	75	1								1
	80	0

## Sheet: M-index
IID	Average_MI	triple_ancestral	bin		IID	Average_MI	L374F_1	L374F_2	bin		IID	Average_MI	albino_1	albino_2	bin		IID	Average_MI	A111T_1	A111T_2	bin
278	32.5394	1	6		331	31.3953	1		6		331	31.3953	1		6		329	23.8007	1		4
42	33.5229	1	6		354	33.0109	1		6		185	31.8727	1		6		254	28.6792	1		5
336	34.6696	1	6		341	36.3289	1		7		309	33.4311	1		6		356	29.0535	1		5
14	35.0268	1	7		310	36.4679	1		7		223	34.9438	1		6		442	29.0632	1		5
282	35.6095	1	7		501	37.5749	1		7		6	37.5696	1		7		253	30.9466	1		6
281	35.8818	1	7		249	37.7022	1		7		213	38.0043	1		7		178	31.205	1		6
49	36.0583	1	7		270	38.1909	1		7		222	38.2656	1		7		185	31.8727	1		6
35	36.1778	1	7		13	38.4291	1		7		333	39.1594	1		7		284	31.8975	1		6
142	36.4611	1	7		207	39.0487	1		7		202	39.459	1		7		170	32.1284	1		6
412	36.8668	1	7		333	39.1594	1		7		141	40.1329	1		8		354	33.0109	1		6
274	37.2995	1	7		202	39.459	1		7		214	41.1379	1		8		167	33.049	1		6
308	37.3091	1	7		156	39.8109	1		7		215	41.3606	1		8		309	33.4311	1		6
186	37.3184	1	7		446	40.3422	1		8		96	41.487	1		8		83	33.8647	1		6
118	37.5217	1	7		338	40.6158	1		8		158	42.0372	1		8		419	34.2216	1		6
303	37.6392	1	7		413	40.7075	1		8		12	44.0098	1		8		445	34.2771	1		6
11	37.8665	1	7		245	40.7215	1		8		305	45.9174	1		9		360	34.5013	1		6
393	38.1472	1	7		220	40.8408	1		8		226	46.9529	1		9		369	34.5492	1		6
283	38.2699	1	7		330	41.2496	1		8		155	47.1954	1		9		223	34.9438	1		6
438	38.2908	1	7		434	41.2777	1		8		212	48.5892	1		9		277	34.9885	1		6
252	38.3254	1	7		385	41.4416	1		8		251	49.1611	1		9		230	35.1332	1		7
300	38.3526	1	7		133	41.4646	1		8		132	49.2327	1		9		417	35.2599	1		7
131	38.5982	1	7		224	42.0148	1		8		221	52.6748	1		10		45	35.5724	1		7
68	38.6427	1	7		326	42.7947	1		8		236	54.1271	1		10		208	36.0776	1		7
144	38.6782	1	7		289	43.6164	1		8		394	20.6611	2	2	4		195	36.1145	1		7
464	38.7541	1	7		403	44.4683	1		8		203	22.4441	2	2	4		199	36.1665	1		7
104	39.0893	1	7		337	44.5043	1		8		329	23.8007	2	2	4		341	36.3289	1		7
82	39.1512	1	7		384	45.242	1		9								441	36.6136	1		7
402	39.2688	1	7		423	45.5449	1		9								458	36.6288	1		7
463	39.2792	1	7		366	46.4126	1		9								233	36.753	1		7
33	39.3172	1	7		248	46.9836	1		9								273	36.7979	1		7
27	39.38	1	7		410	48.6269	1		9								279	37.1823	1		7
124	39.3842	1	7		321	49.0145	1		9								149	37.224	1		7
85	39.4742	1	7		221	52.6748	1		10								70	37.3244	1		7
171	39.5548	1	7		424	54.1702	1		10								109	37.3569	1		7
123	39.8421	1	7		225	54.2622	1		10								436	37.4442	1		7
22	39.8622	1	7		60	54.7322	1		10								292	37.5446	1		7
26	39.8743	1	7		340	55.9397	1		11								501	37.5749	1		7
3	39.9033	1	7		145	57.1722	1		11								379	37.7949	1		7
459	39.9167	1	7		362	57.8042	1		11								93	37.8691	1		7
272	39.9335	1	7		332	58.1042	1		11								29	37.871	1		7
374	39.9796	1	7		135	61.3329	1		12								256	37.8894	1		7
153	40.3587	1	8		31	62.3737	1		12								378	38.1528	1		7
148	40.4266	1	8		449	70.0684	1		14								20	38.2534	1		7
62	40.7403	1	8		1	31.1591	2	2	6								190	38.5553	1		7
101	40.7651	1	8		208	36.0776	2	2	7								173	38.7528	1		7
398	40.7925	1	8		325	41.7963	2	2	8								426	38.8021	1		7
422	40.797	1	8														291	38.9175	1		7
376	40.8481	1	8														323	38.9413	1		7
2	40.9429	1	8														269	38.9983	1		7
112	41.2099	1	8														333	39.1594	1		7
77	41.2256	1	8														193	39.3392	1		7
187	41.3264	1	8														160	39.4476	1		7
350	41.4039	1	8														339	39.5194	1		7
257	41.4276	1	8														8	39.5525	1		7
357	41.4342	1	8														327	39.8815	1		7
399	41.4438	1	8														73	40.2211	1		8
18	41.4906	1	8														78	40.5131	1		8
147	41.5007	1	8														46	40.5742	1		8
119	41.5598	1	8														338	40.6158	1		8
418	41.6191	1	8														61	40.6648	1		8
172	41.6596	1	8														220	40.8408	1		8
431	41.734	1	8														355	40.8444	1		8
107	41.7628	1	8														206	40.9058	1		8
371	41.8082	1	8														79	41.0132	1		8
448	41.8213	1	8														176	41.1204	1		8
429	41.9125	1	8														214	41.1379	1		8
198	41.9216	1	8														330	41.2496	1		8
373	41.9708	1	8														58	41.3056	1		8
184	42.0399	1	8														32	41.3109	1		8
314	42.0521	1	8														385	41.4416	1		8
201	42.0897	1	8														428	41.6854	1		8
139	42.3484	1	8														161	41.749	1		8
194	42.4685	1	8														325	41.7963	1		8
108	42.54	1	8														241	41.8158	1		8
71	42.5416	1	8														97	41.8457	1		8
121	42.5468	1	8														150	42.0033	1		8
316	42.7003	1	8														159	42.5066	1		8
7	42.7009	1	8														259	42.6472	1		8
216	42.8227	1	8														427	42.8517	1		8
439	42.8267	1	8														34	42.9088	1		8
38	42.8811	1	8														386	43.0335	1		8
228	42.9269	1	8														181	43.2201	1		8
111	42.9378	1	8														285	43.3438	1		8
86	42.9406	1	8														94	43.3795	1		8
23	43.288	1	8														462	44.0806	1		8
294	43.3049	1	8														162	44.1003	1		8
189	43.3488	1	8														364	44.2174	1		8
275	43.5742	1	8														451	44.3369	1		8
102	43.6816	1	8														110	45.137	1		9
396	43.6908	1	8														261	45.5132	1		9
260	43.7811	1	8														390	46.3136	1		9
342	44.0263	1	8														366	46.4126	1		9
197	44.1621	1	8														235	46.6042	1		9
353	44.2098	1	8														92	46.816	1		9
115	44.2113	1	8														59	47.6955	1		9
117	44.2919	1	8														358	47.7697	1		9
219	44.2991	1	8														63	47.8704	1		9
55	44.3053	1	8														182	47.8768	1		9
157	44.3811	1	8														381	47.9012	1		9
351	44.4212	1	8														425	48.0623	1		9
406	44.464	1	8														183	48.1077	1		9
105	44.5003	1	8														229	48.3463	1		9
16	44.6811	1	8														276	48.353	1		9
76	44.7105	1	8														452	48.7331	1		9
349	44.846	1	8														175	49.0728	1		9
75	44.9218	1	8														392	49.2294	1		9
298	45.028	1	9														52	49.252	1		9
271	45.1416	1	9														286	49.6071	1		9
5	45.1976	1	9														103	52.3447	1		10
440	45.2497	1	9														28	52.6611	1		10
250	45.2882	1	9														54	53.4396	1		10
416	45.3278	1	9														72	53.5568	1		10
387	45.3723	1	9														424	54.1702	1		10
242	45.3791	1	9														41	54.6008	1		10
265	45.4879	1	9														340	55.9397	1		11
361	45.5647	1	9														370	56.5267	1		11
154	45.5719	1	9														145	57.1722	1		11
98	45.608	1	9														444	58.0824	1		11
258	45.6436	1	9														218	75.4958	1		15
127	45.6747	1	9														1	31.1591	2	2	6
179	45.7707	1	9														347	33.2608	2	2	6
383	45.7815	1	9														81	33.9671	2	2	6
177	45.8207	1	9														375	38.6465	2	2	7
99	45.928	1	9														188	41.4922	2	2	8
91	46.0129	1	9
453	46.0187	1	9
368	46.044	1	9
313	46.0538	1	9
74	46.0829	1	9
421	46.0873	1	9
437	46.1756	1	9
114	46.3273	1	9
460	46.362	1	9
404	46.5033	1	9
280	46.5863	1	9
168	46.6418	1	9
57	46.6535	1	9
334	46.669	1	9
365	46.7055	1	9
100	46.9787	1	9
129	46.9819	1	9
66	47.0414	1	9
56	47.0797	1	9
164	47.1509	1	9
53	47.1854	1	9
67	47.2087	1	9
200	47.278	1	9
320	47.3568	1	9
227	47.3868	1	9
180	47.4431	1	9
217	47.6215	1	9
318	47.6259	1	9
163	47.728	1	9
128	47.9236	1	9
401	48.047	1	9
126	48.0746	1	9
120	48.0865	1	9
307	48.124	1	9
391	48.3768	1	9
348	48.4702	1	9
420	48.4947	1	9
146	48.6849	1	9
324	48.6992	1	9
415	48.9925	1	9
234	49.1801	1	9
21	49.2186	1	9
166	49.2219	1	9
430	49.2277	1	9
122	49.2637	1	9
389	49.4711	1	9
288	49.492	1	9
4	49.4974	1	9
95	49.5491	1	9
209	49.6673	1	9
106	49.6725	1	9
312	49.7949	1	9
296	49.8395	1	9
352	49.9362	1	9
174	49.988	1	9
295	49.9933	1	9
143	50.0904	1	10
87	50.2055	1	10
408	50.23	1	10
359	50.2333	1	10
255	50.2504	1	10
328	50.3659	1	10
134	50.4204	1	10
287	50.5435	1	10
191	50.6315	1	10
17	50.6502	1	10
47	50.6955	1	10
246	50.7665	1	10
137	50.9738	1	10
24	50.9926	1	10
152	51.0481	1	10
450	51.2468	1	10
367	51.3158	1	10
30	51.4432	1	10
414	51.4515	1	10
388	51.5296	1	10
88	51.6184	1	10
395	51.6324	1	10
304	52.1627	1	10
266	52.2815	1	10
36	52.2936	1	10
264	52.3206	1	10
19	52.38	1	10
10	52.9404	1	10
397	52.9783	1	10
244	53.0046	1	10
343	53.055	1	10
346	53.1433	1	10
409	53.3254	1	10
138	53.3513	1	10
237	53.3883	1	10
37	53.4297	1	10
243	53.519	1	10
140	53.7153	1	10
335	53.7536	1	10
43	53.9065	1	10
9	54.0681	1	10
136	54.1428	1	10
90	54.1854	1	10
80	54.3867	1	10
240	54.4102	1	10
192	54.6513	1	10
116	54.7444	1	10
247	54.7599	1	10
84	55.0178	1	11
306	55.0574	1	11
239	55.585	1	11
238	55.6844	1	11
377	56.2216	1	11
301	56.2227	1	11
268	56.2418	1	11
380	56.2711	1	11
196	56.3786	1	11
263	56.6684	1	11
64	56.7831	1	11
169	56.9513	1	11
432	57.5706	1	11
317	57.6121	1	11
322	57.7596	1	11
232	57.788	1	11
65	57.9912	1	11
125	58.04	1	11
40	58.1232	1	11
315	58.1251	1	11
231	58.4622	1	11
344	58.5667	1	11
411	58.6652	1	11
319	58.747	1	11
382	58.8116	1	11
204	58.817	1	11
130	59.2438	1	11
302	59.5846	1	11
363	60.0594	1	12
299	60.7408	1	12
290	60.7543	1	12
293	60.828	1	12
151	61.9491	1	12
372	62.0127	1	12
267	62.3182	1	12
48	62.4362	1	12
51	63.0743	1	12
89	63.5432	1	12
39	63.9482	1	12
211	65.9921	1	13
297	67.9474	1	13
50	68.5993	1	13
443	69.3011	1	13
44	71.943	1	14
405	72.2295	1	14
461	74.7594	1	14
165	74.8486	1	14
345	79.6638	1	15

## Sheet: Fig 4-S1
bin	bottom	count	top										IID	Average_MI
4	20	3	25										1	31.1591
5	25	3	30										2	40.9429
6	30	23	35										3	39.9033
7	35	87	40										4	49.4974
8	40	118	45										5	45.1976
9	45	107	50										6	37.5696
10	50	60	55										7	42.7009
11	55	36	60										8	39.5525
12	60	13	65										9	54.0681
13	65	4	70										10	52.9404
14	70	5	75										11	37.8665
15	75	2	80										12	44.0098
16	80	0	85										13	38.4291
													14	35.0268
													16	44.6811
													17	50.6502
													18	41.4906
													19	52.38
													20	38.2534
													21	49.2186
													22	39.8622
													23	43.288
													24	50.9926
													26	39.8743
													27	39.38
													28	52.6611
													29	37.871
													30	51.4432
													31	62.3737
													32	41.3109
													33	39.3172
													34	42.9088
													35	36.1778
													36	52.2936
													37	53.4297
													38	42.8811
													39	63.9482
													40	58.1232
													41	54.6008
													42	33.5229
													43	53.9065
													44	71.943
													45	35.5724
													46	40.5742
													47	50.6955
													48	62.4362
													49	36.0583
													50	68.5993
													51	63.0743
													52	49.252
													53	47.1854
													54	53.4396
													55	44.3053
													56	47.0797
													57	46.6535
													58	41.3056
													59	47.6955
													60	54.7322
													61	40.6648
													62	40.7403
													63	47.8704
													64	56.7831
													65	57.9912
													66	47.0414
													67	47.2087
													68	38.6427
													70	37.3244
													71	42.5416
													72	53.5568
													73	40.2211
													74	46.0829
													75	44.9218
													76	44.7105
													77	41.2256
													78	40.5131
													79	41.0132
													80	54.3867
													81	33.9671
													82	39.1512
													83	33.8647
													84	55.0178
													85	39.4742
													86	42.9406
													87	50.2055
													88	51.6184
													89	63.5432
													90	54.1854
													91	46.0129
													92	46.816
													93	37.8691
													94	43.3795
													95	49.5491
													96	41.487
													97	41.8457
													98	45.608
													99	45.928
													100	46.9787
													101	40.7651
													102	43.6816
													103	52.3447
													104	39.0893
													105	44.5003
													106	49.6725
													107	41.7628
													108	42.54
													109	37.3569
													110	45.137
													111	42.9378
													112	41.2099
													113	45.9082
													114	46.3273
													115	44.2113
													116	54.7444
													117	44.2919
													118	37.5217
													119	41.5598
													120	48.0865
													121	42.5468
													122	49.2637
													123	39.8421
													124	39.3842
													125	58.04
													126	48.0746
													127	45.6747
													128	47.9236
													129	46.9819
													130	59.2438
													131	38.5982
													132	49.2327
													133	41.4646
													134	50.4204
													135	61.3329
													136	54.1428
													137	50.9738
													138	53.3513
													139	42.3484
													140	53.7153
													141	40.1329
													142	36.4611
													143	50.0904
													144	38.6782
													145	57.1722
													146	48.6849
													147	41.5007
													148	40.4266
													149	37.224
													150	42.0033
													151	61.9491
													152	51.0481
													153	40.3587
													154	45.5719
													155	47.1954
													156	39.8109
													157	44.3811
													158	42.0372
													159	42.5066
													160	39.4476
													161	41.749
													162	44.1003
													163	47.728
													164	47.1509
													165	74.8486
													166	49.2219
													167	33.049
													168	46.6418
													169	56.9513
													170	32.1284
													171	39.5548
													172	41.6596
													173	38.7528
													174	49.988
													175	49.0728
													176	41.1204
													177	45.8207
													178	31.205
													179	45.7707
													180	47.4431
													181	43.2201
													182	47.8768
													183	48.1077
													184	42.0399
													185	31.8727
													186	37.3184
													187	41.3264
													188	41.4922
													189	43.3488
													190	38.5553
													191	50.6315
													192	54.6513
													193	39.3392
													194	42.4685
													195	36.1145
													196	56.3786
													197	44.1621
													198	41.9216
													199	36.1665
													200	47.278
													201	42.0897
													202	39.459
													203	22.4441
													204	58.817
													205	53.3712
													206	40.9058
													207	39.0487
													208	36.0776
													209	49.6673
													210	40.263
													211	65.9921
													212	48.5892
													213	38.0043
													214	41.1379
													215	41.3606
													216	42.8227
													217	47.6215
													218	75.4958
													219	44.2991
													220	40.8408
													221	52.6748
													222	38.2656
													223	34.9438
													224	42.0148
													225	54.2622
													226	46.9529
													227	47.3868
													228	42.9269
													229	48.3463
													230	35.1332
													231	58.4622
													232	57.788
													233	36.753
													234	49.1801
													235	46.6042
													236	54.1271
													237	53.3883
													238	55.6844
													239	55.585
													240	54.4102
													241	41.8158
													242	45.3791
													243	53.519
													244	53.0046
													245	40.7215
													246	50.7665
													247	54.7599
													248	46.9836
													249	37.7022
													250	45.2882
													251	49.1611
													252	38.3254
													253	30.9466
													254	28.6792
													255	50.2504
													256	37.8894
													257	41.4276
													258	45.6436
													259	42.6472
													260	43.7811
													261	45.5132
													262	45.3862
													263	56.6684
													264	52.3206
													265	45.4879
													266	52.2815
													267	62.3182
													268	56.2418
													269	38.9983
													270	38.1909
													271	45.1416
													272	39.9335
													273	36.7979
													274	37.2995
													275	43.5742
													276	48.353
													277	34.9885
													278	32.5394
													279	37.1823
													280	46.5863
													281	35.8818
													282	35.6095
													283	38.2699
													284	31.8975
													285	43.3438
													286	49.6071
													287	50.5435
													288	49.492
													289	43.6164
													290	60.7543
													291	38.9175
													292	37.5446
													293	60.828
													294	43.3049
													295	49.9933
													296	49.8395
													297	67.9474
													298	45.028
													299	60.7408
													300	38.3526
													301	56.2227
													302	59.5846
													303	37.6392
													304	52.1627
													305	45.9174
													306	55.0574
													307	48.124
													308	37.3091
													309	33.4311
													310	36.4679
													311	56.6376
													312	49.7949
													313	46.0538
													314	42.0521
													315	58.1251
													316	42.7003
													317	57.6121
													318	47.6259
													319	58.747
													320	47.3568
													321	49.0145
													322	57.7596
													323	38.9413
													324	48.6992
													325	41.7963
													326	42.7947
													327	39.8815
													328	50.3659
													329	23.8007
													330	41.2496
													331	31.3953
													332	58.1042
													333	39.1594
													334	46.669
													335	53.7536
													336	34.6696
													337	44.5043
													338	40.6158
													339	39.5194
													340	55.9397
													341	36.3289
													342	44.0263
													343	53.055
													344	58.5667
													345	79.6638
													346	53.1433
													347	33.2608
													348	48.4702
													349	44.846
													350	41.4039
													351	44.4212
													352	49.9362
													353	44.2098
													354	33.0109
													355	40.8444
													356	29.0535
													357	41.4342
													358	47.7697
													359	50.2333
													360	34.5013
													361	45.5647
													362	57.8042
													363	60.0594
													364	44.2174
													365	46.7055
													366	46.4126
													367	51.3158
													368	46.044
													369	34.5492
													370	56.5267
													371	41.8082
													372	62.0127
													373	41.9708
													374	39.9796
													375	38.6465
													376	40.8481
													377	56.2216
													378	38.1528
													379	37.7949
													380	56.2711
													381	47.9012
													382	58.8116
													383	45.7815
													384	45.242
													385	41.4416
													386	43.0335
													387	45.3723
													388	51.5296
													389	49.4711
													390	46.3136
													391	48.3768
													392	49.2294
													393	38.1472
													394	20.6611
													395	51.6324
													396	43.6908
													397	52.9783
													398	40.7925
													399	41.4438
													400	41.0097
													401	48.047
													402	39.2688
													403	44.4683
													404	46.5033
													405	72.2295
													406	44.464
													407	44.9054
													408	50.23
													409	53.3254
													410	48.6269
													411	58.6652
													412	36.8668
													413	40.7075
													414	51.4515
													415	48.9925
													416	45.3278
													417	35.2599
													418	41.6191
													419	34.2216
													420	48.4947
													421	46.0873
													422	40.797
													423	45.5449
													424	54.1702
													425	48.0623
													426	38.8021
													427	42.8517
													428	41.6854
													429	41.9125
													430	49.2277
													431	41.734
													432	57.5706
													433	30.7041
													434	41.2777
													436	37.4442
													437	46.1756
													438	38.2908
													439	42.8267
													440	45.2497
													441	36.6136
													442	29.0632
													443	69.3011
													444	58.0824
													445	34.2771
													446	40.3422
													447	58.2669
													448	41.8213
													449	70.0684
													450	51.2468
													451	44.3369
													452	48.7331
													453	46.0187
													454	40.928
													455	51.5299
													456	36.9339
													457	39.4353
													458	36.6288
													459	39.9167
													460	46.362
													461	74.7594
													462	44.0806
													463	39.2792
													464	38.7541
													501	37.5749

## Sheet: Fig 4 - S2
Carib	Mixed
0	1
1	0
4	3
20	6
28	7
12	9
4	4
3	2
0	4
0	0
72	36
