# Supplementary material for: Native American genetic ancestry and pigmentation allele contributions to skin color in a Caribbean population
Source: eLife journal article supplement (doi:10.7554/elife.77514), 2023-06-09
Supplement: supp [file elife-77514-supp-v1.zip]

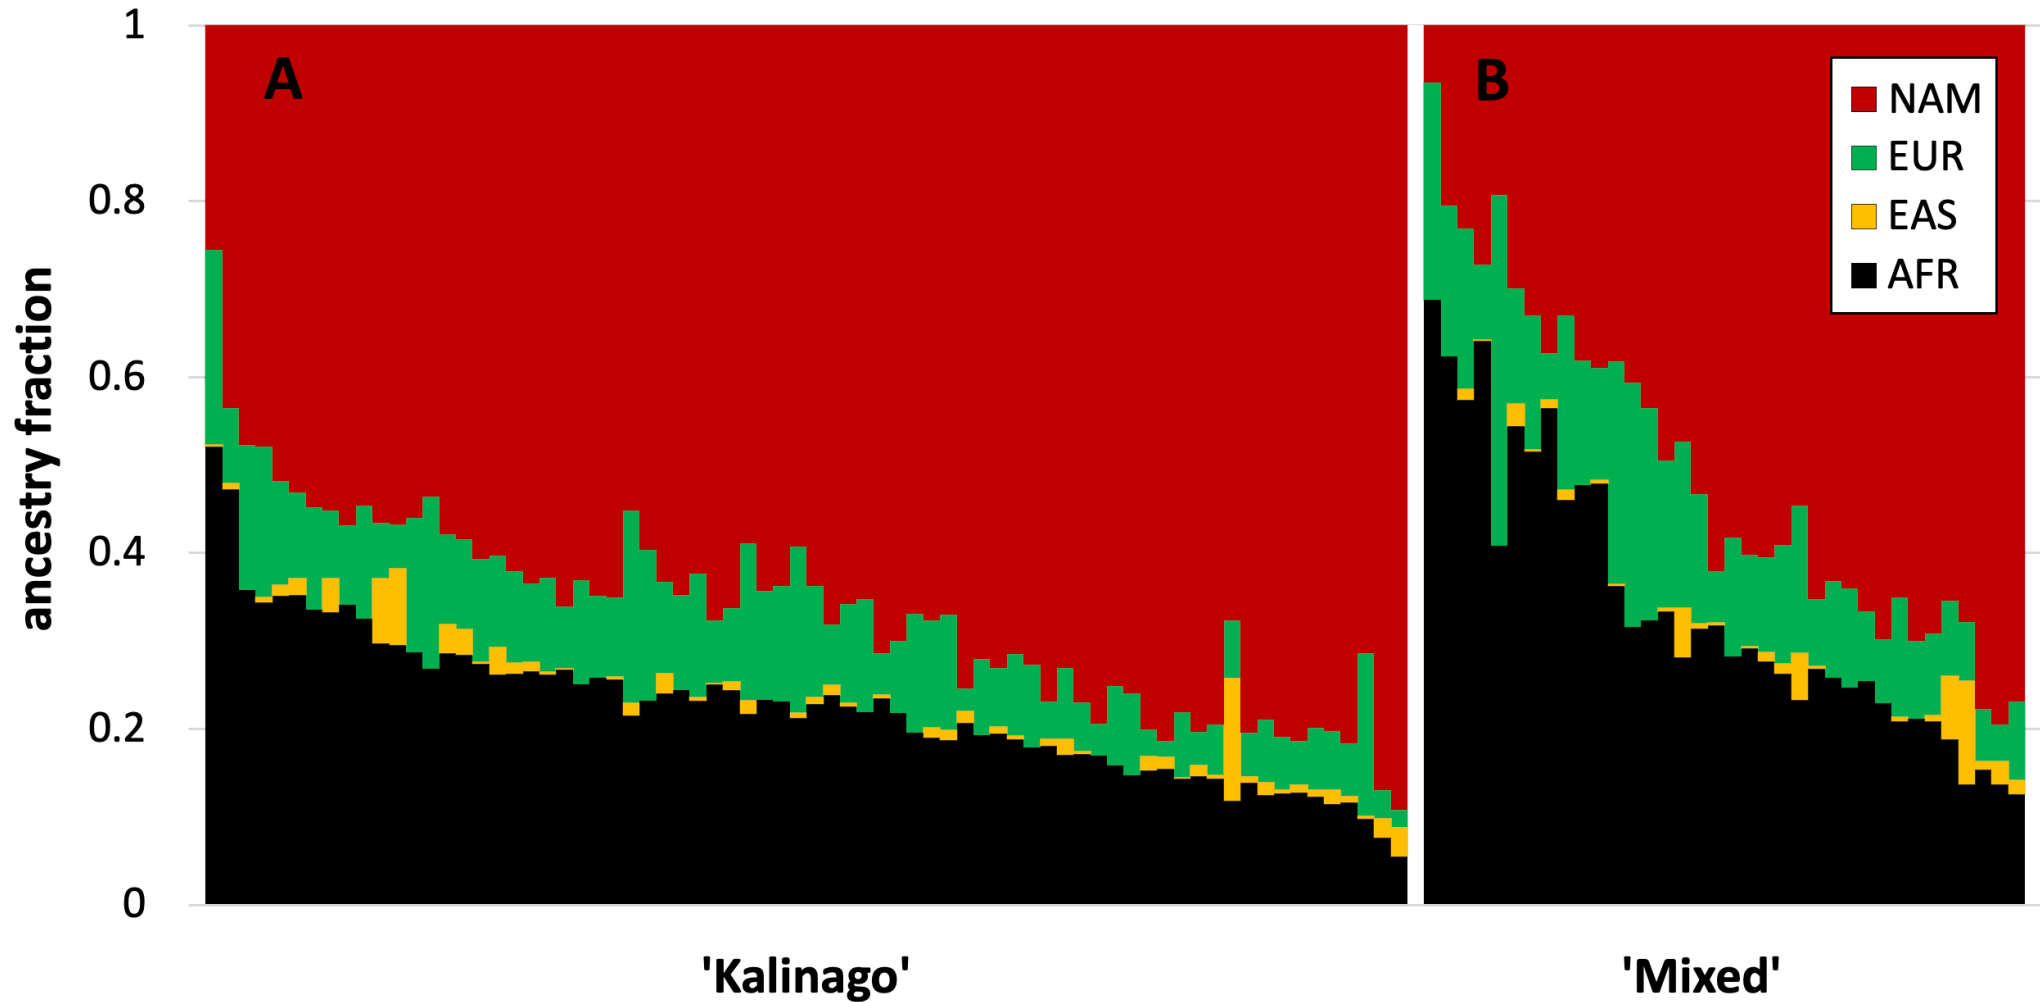

**Figure 2 – Supplementary Figure 2. Ancestry distribution as function of community-defined ancestry.** Individual ancestry fraction was estimated using Admixture (K=4) as described. Individuals identified as **A** 'Kalinago' (n=72) have higher NAM and lower AFR and EUR ancestry than those identified as **B** 'Mixed' (n=36). Despite considerable overlap in ancestry proportions between individuals, the distributions are distinctly different. Compared to individuals identified as “Mixed,” those identified as “Kalinago” have on average more Native American ancestry (67% vs 51%), less European ancestry (10% vs 14%), and less African ancestry (23% vs 34%). Similarly, the phenotypic distributions of the two groups differed.
