# Supplementary material for: Native American genetic ancestry and pigmentation allele contributions to skin color in a Caribbean population
Source: eLife journal article supplement (doi:10.7554/elife.77514), 2023-06-09
Supplement: supp [file elife-77514-supp-v1.zip]

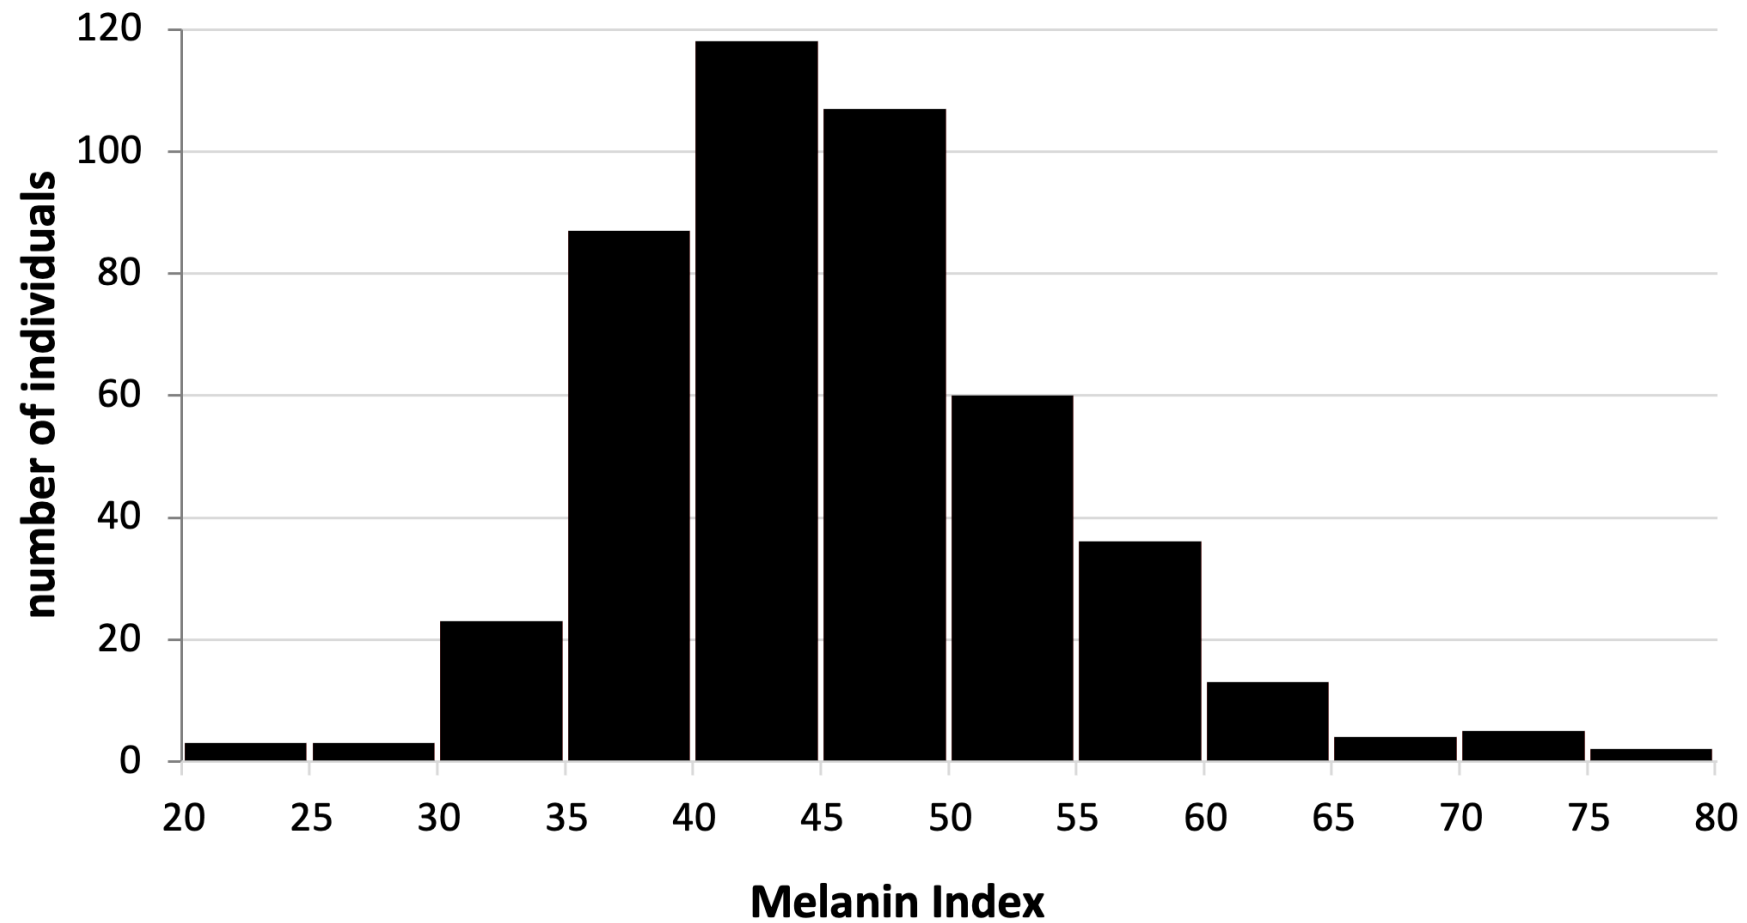

**Figure 4 – Supplementary Figure 1: Skin color distribution of the Kalinago from Commonwealth of Dominica.** We collected 462 Kalinago who live in the Kalinago Reservation. Each participant was asked a set of questions about their ancestry, gave their saliva sample, and have their skin color measured under their arm.
