# Supplementary material for: Native American genetic ancestry and pigmentation allele contributions to skin color in a Caribbean population
Source: eLife journal article supplement (doi:10.7554/elife.77514), 2023-06-09
Supplement: supp [file elife-77514-supp-v1.zip]

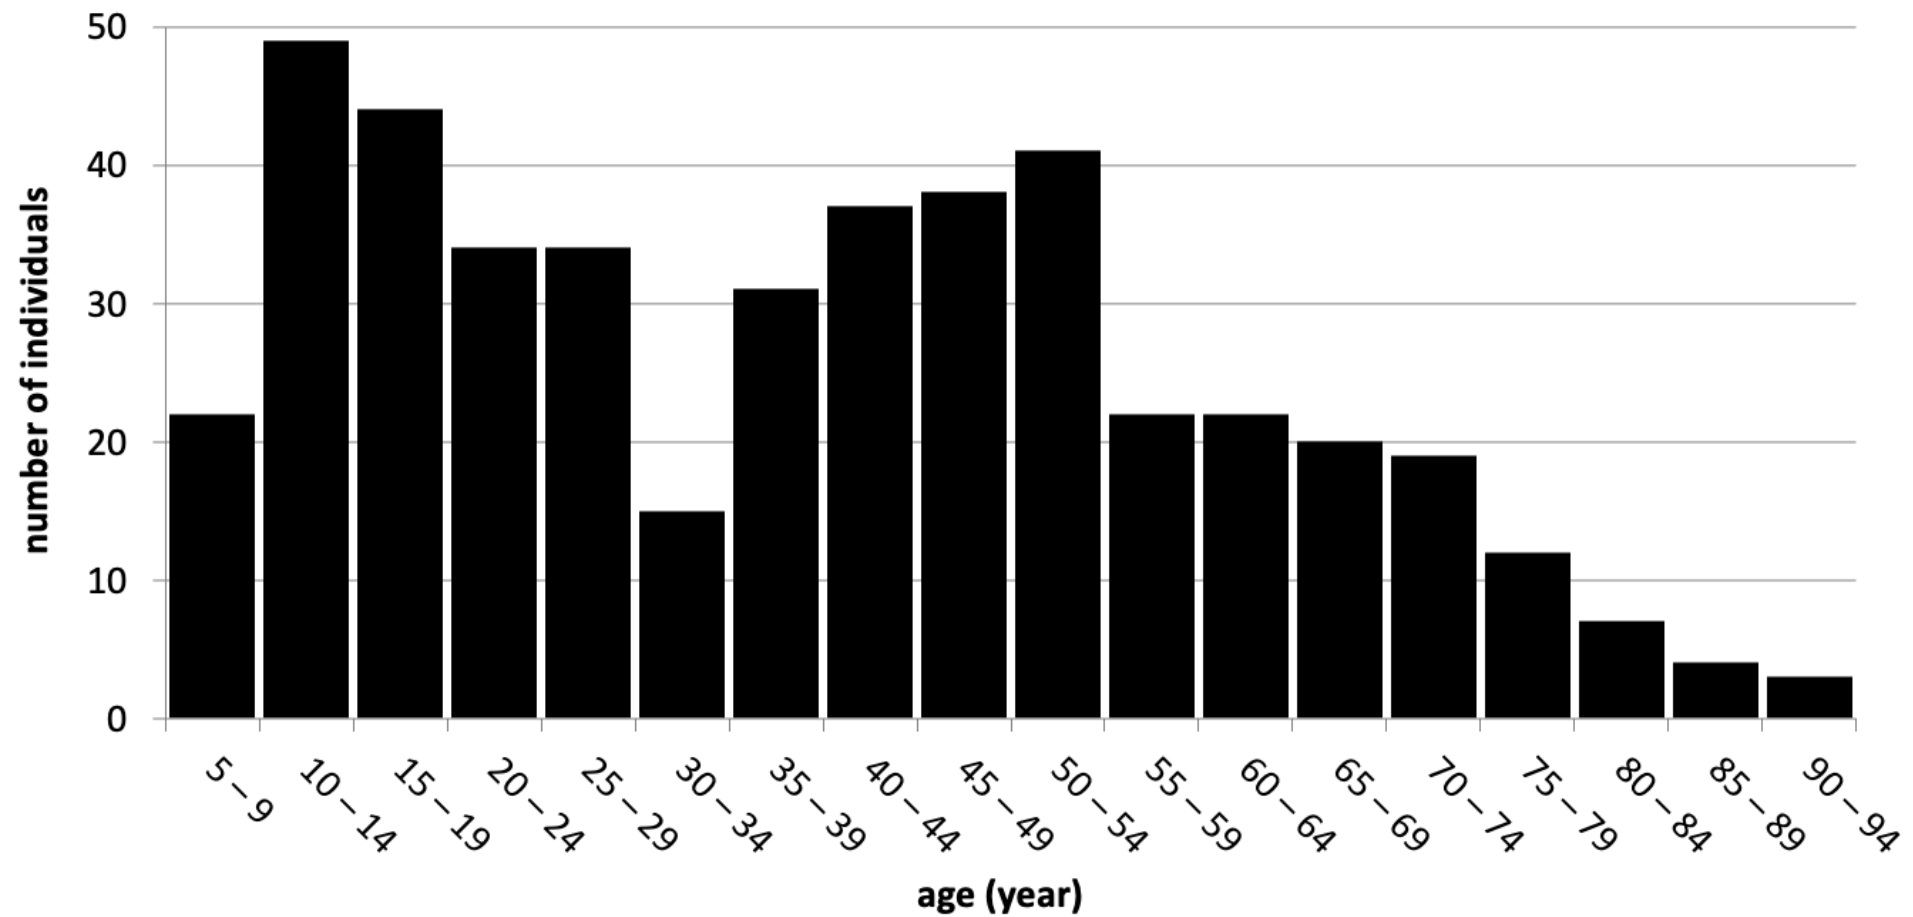

**Figure 1 – Supplementary Figure 3. Age distribution of sampled Kalinago individuals.** Histogram shows age in years at last birthday for all sampled individuals for whom this information was collected (n=455).
