# Supplementary material for: Native American genetic ancestry and pigmentation allele contributions to skin color in a Caribbean population
Source: eLife journal article supplement (doi:10.7554/elife.77514), 2023-06-09
Supplement: supp [file elife-77514-supp-v1.zip]

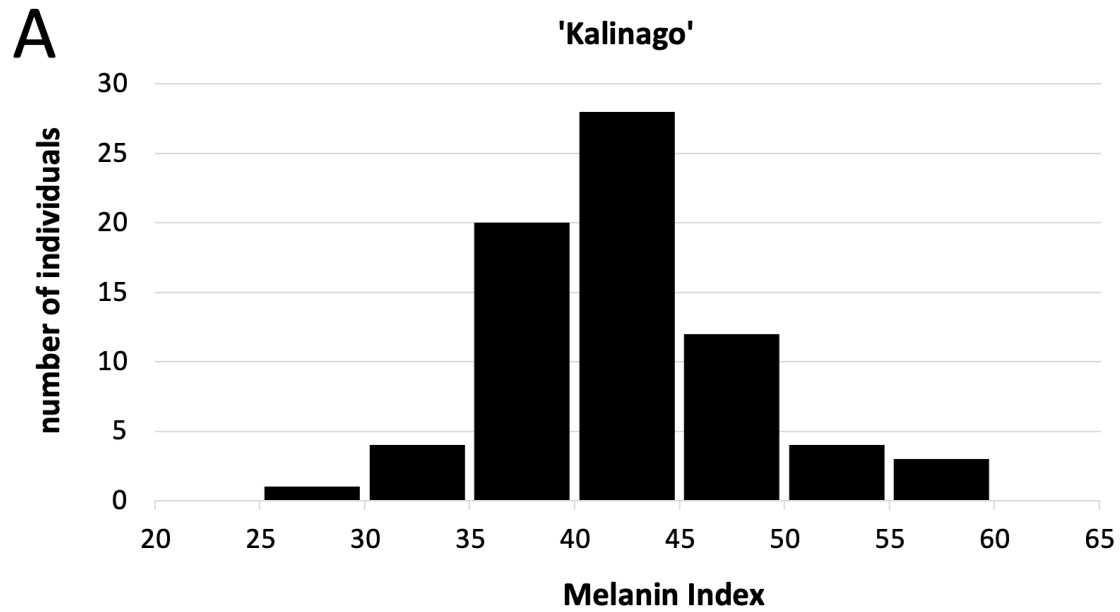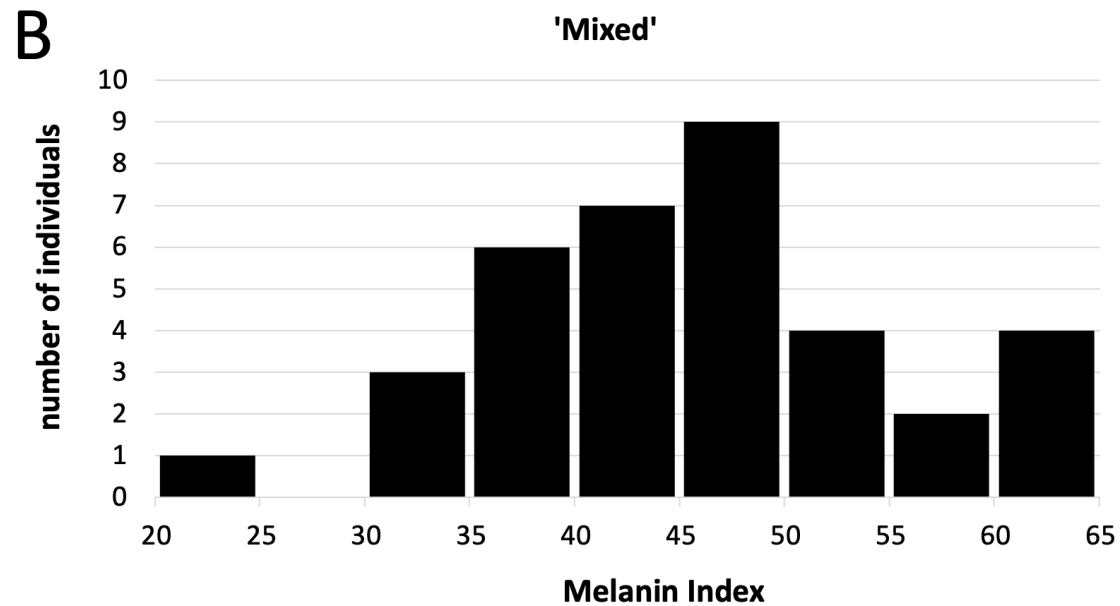

**Figure 4 – Supplementary Figure 2: Melanin Index distribution as function of community-described ancestry.** Individuals described as **(A)** “Kalinago” (n=72) were slightly lighter and had a narrower MI distribution ( $42.5 \pm 5.6$ , mean  $\pm$  SD) than those described as **(B)** “Mixed” ( $45.8 \pm 9.6$ ).
