# Supplementary material for: Native American genetic ancestry and pigmentation allele contributions to skin color in a Caribbean population
Source: eLife journal article supplement (doi:10.7554/elife.77514), 2023-06-09
Supplement: supp [file elife-77514-supp-v1.zip]

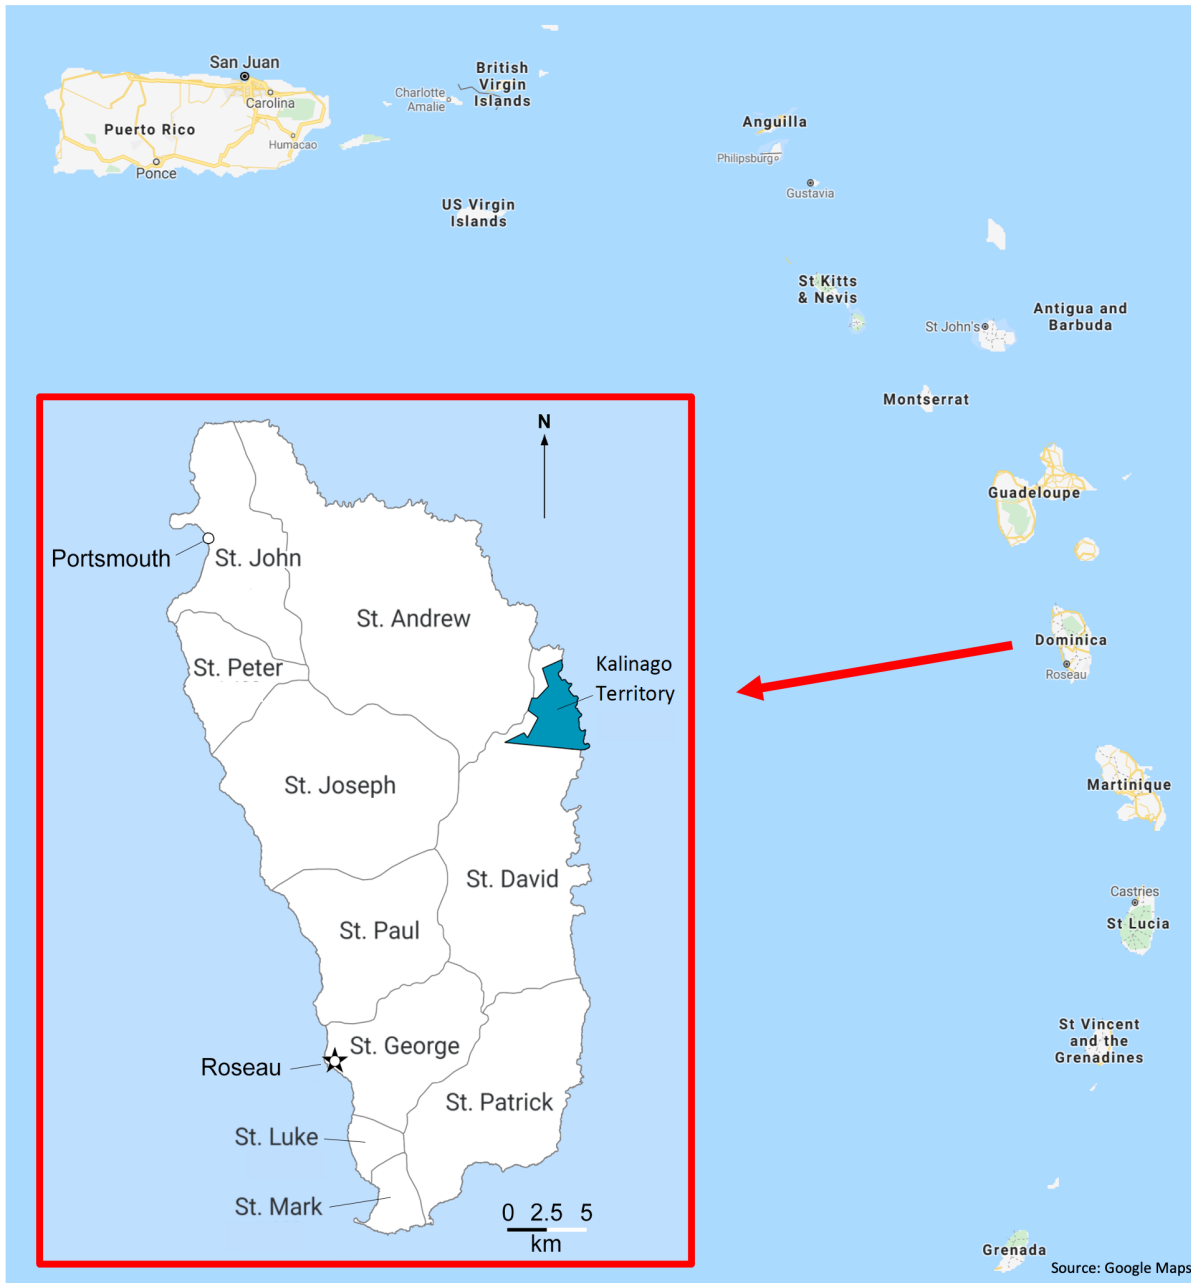

**Figure 1 – Supplementary Figure 2. Map showing the location of Kalinago Territory in the Commonwealth of Dominica.** Dominica, also known as *Wai'tu kubuli* in the Kalinago language, is clustered with the Leeward Islands in the Lesser Antilles archipelago of the Caribbean Sea. Main map situates Dominica within the Eastern Caribbean. Inset shows Dominica, with location of Kalinago Reservation (blue) in relation to parishes and principal towns. (Map modified from SESA CROP Report and Google Maps.)
