# Supplementary material for: Native American genetic ancestry and pigmentation allele contributions to skin color in a Caribbean population
Source: eLife journal article supplement (doi:10.7554/elife.77514), 2023-06-09
Supplement: supp [file elife-77514-supp-v1.zip]

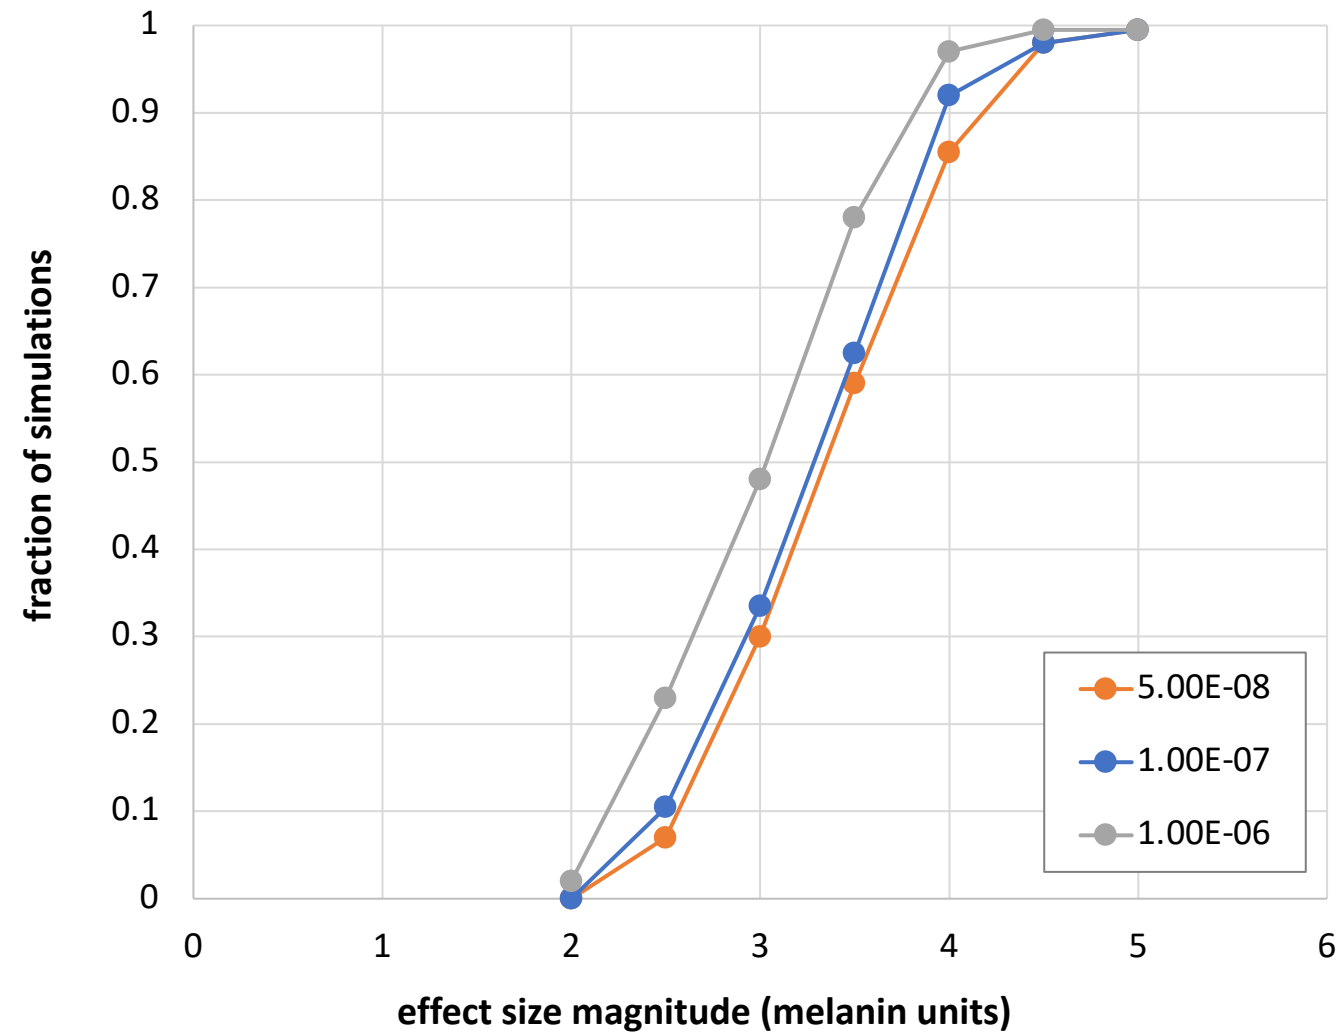

**Figure 5 – Supplementary Figure 1: Estimated power for GWAS using Kalinago sample.** Simulations were performed as described in Methods, using genotyped SNPs with estimated frequency difference between African and Native American ancestral populations of at least 0.7 and adjusted p-value of at least 0.1.
