# Supplementary material for: Native American genetic ancestry and pigmentation allele contributions to skin color in a Caribbean population
Source: eLife journal article supplement (doi:10.7554/elife.77514), 2023-06-09
Supplement: supp [file elife-77514-supp-v1.zip]

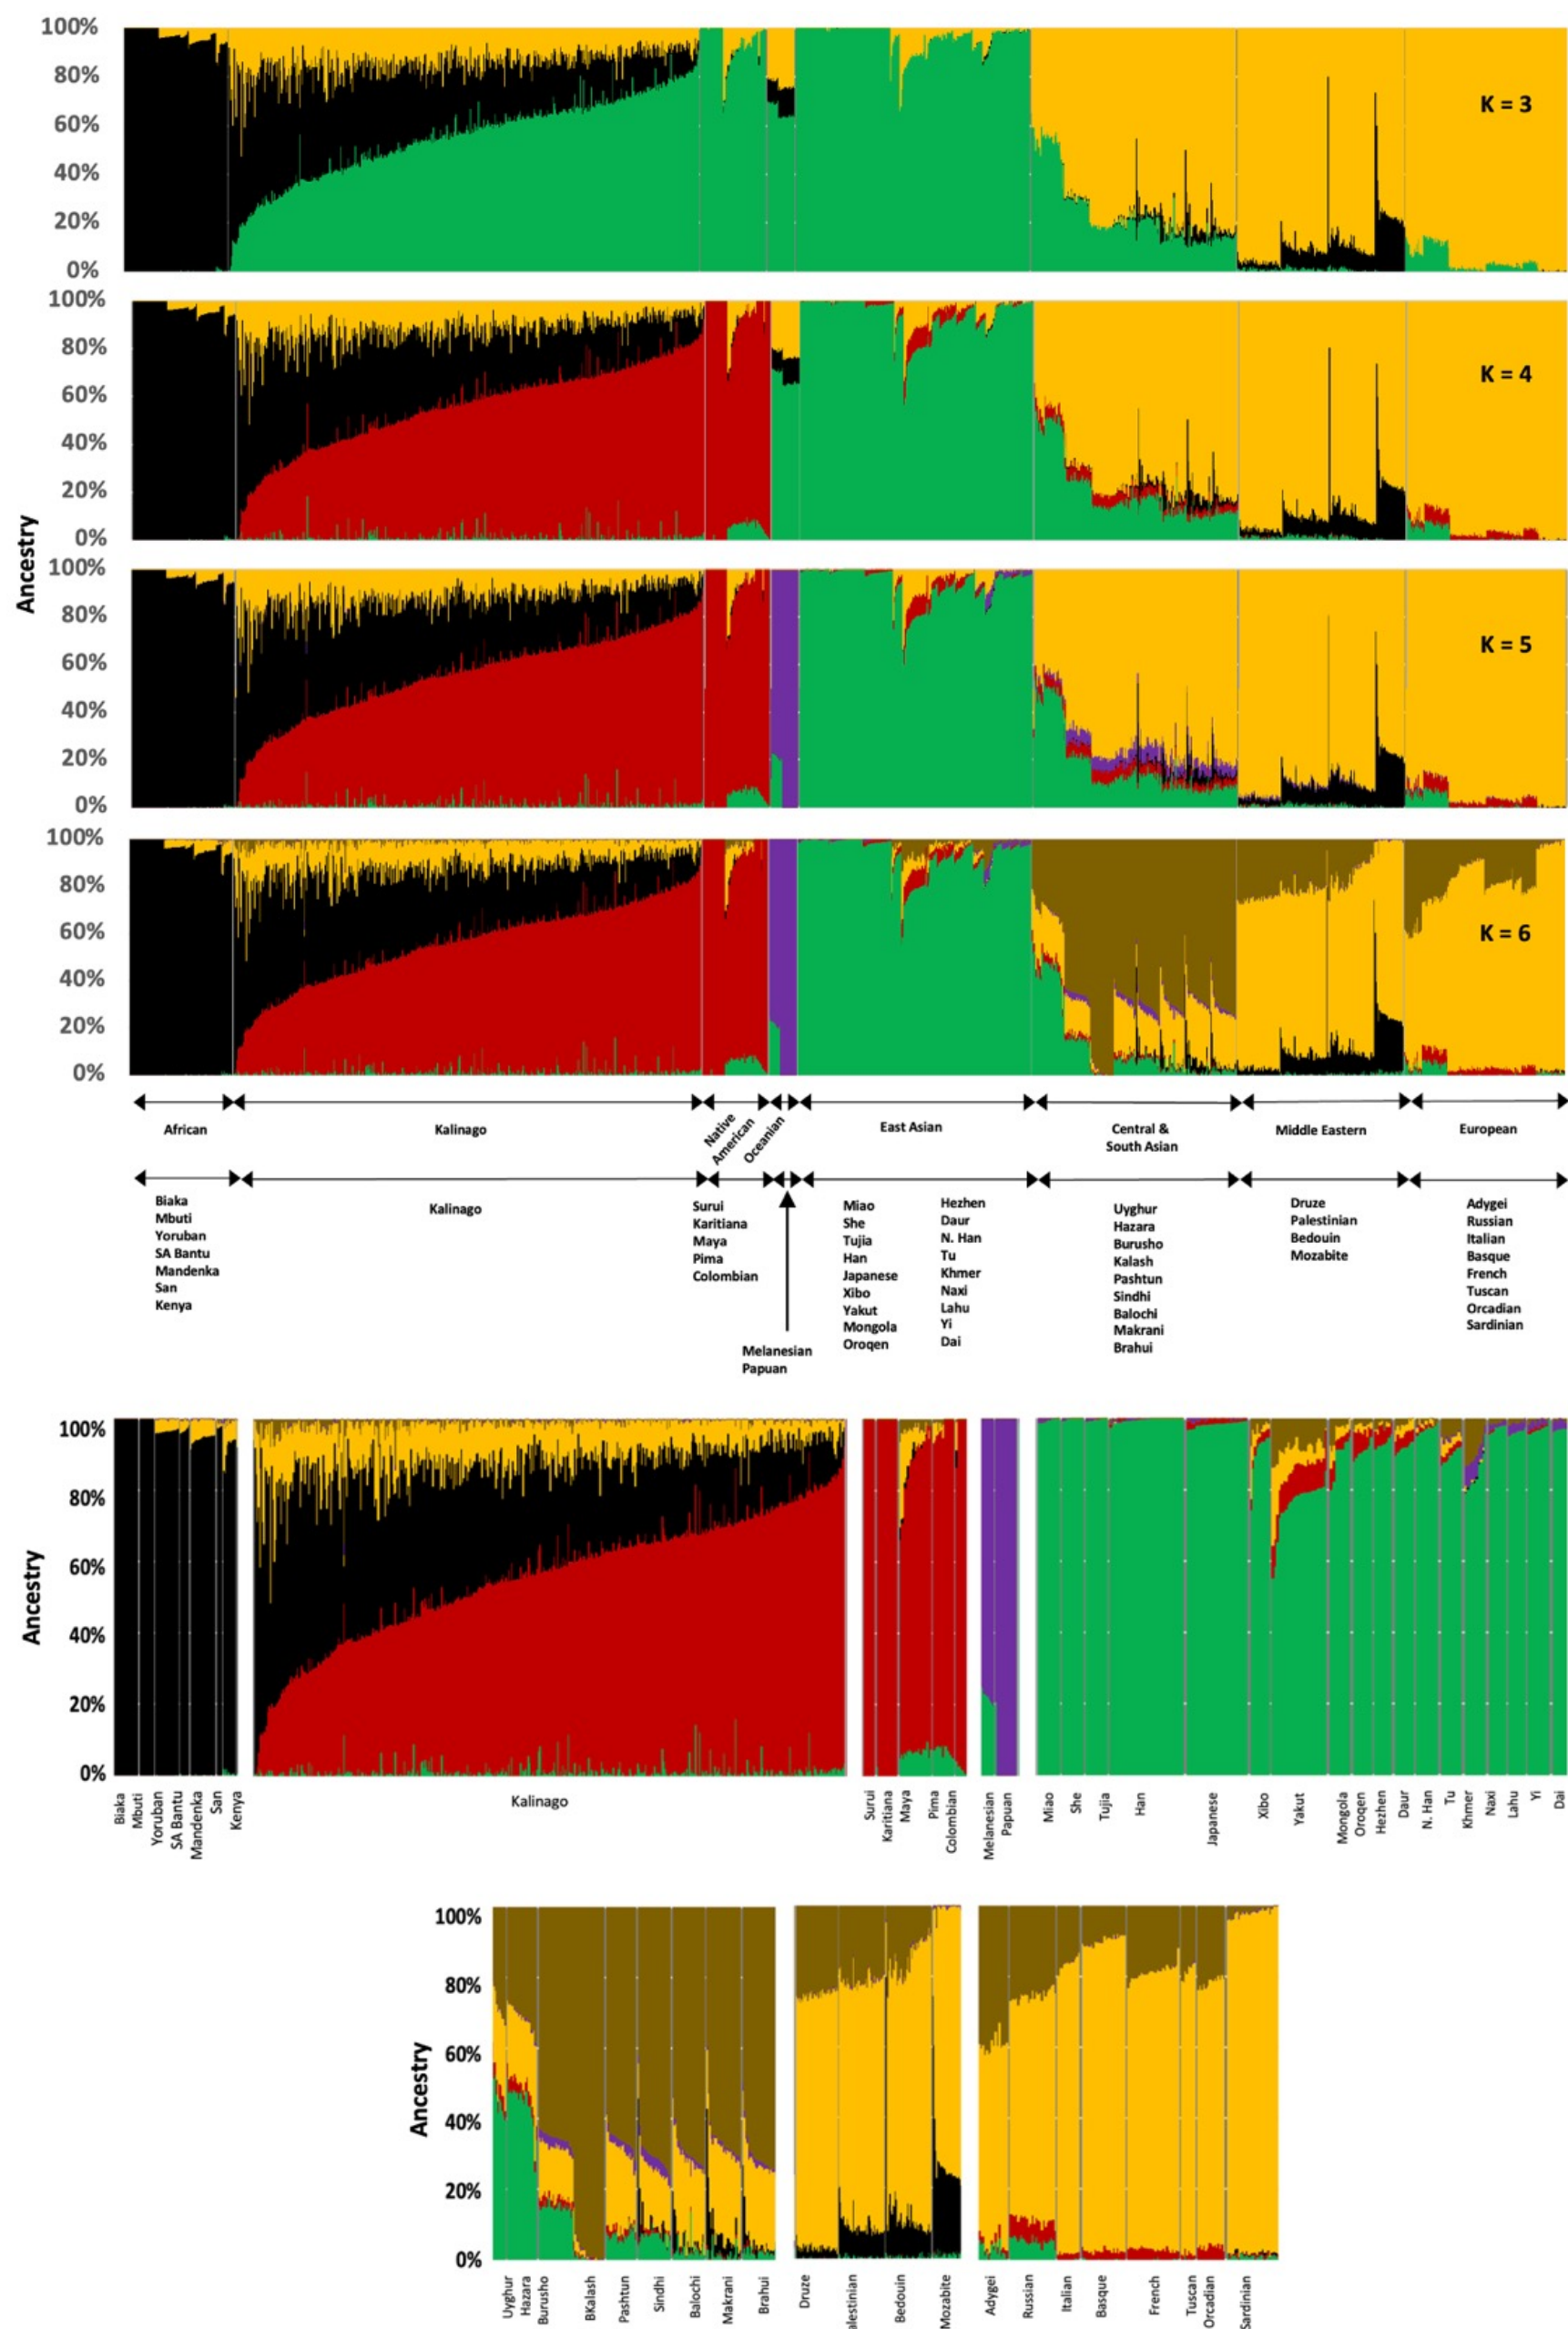

**Figure 1 – Supplementary Figure 1: Admixture plot of Kalinago compared to Human Genome Diversity Project data from K=3 to K=6. Expanded admixture plot at K=6 labeled each of the populations used, from panel A-F.**
