# Supplementary material for: Native American genetic ancestry and pigmentation allele contributions to skin color in a Caribbean population
Source: eLife. 2023 Jun 9;12:e77514. doi: 10.7554/eLife.77514 (PMC10371226; doi:10.7554/eLife.77514)
Supplement: Supplementary file 4. [file elife-77514-supp4.xlsx]

## Sheet: Sheet1
IID	Sex	M-index	NW273KV	A111T	L374F	PC1	PC2	PC3	PC4	PC5	PC6	PC7	PC8	PC9	PC10	AGE
1	2	31.1591	0	2	2	-0.0696	-0.0512	0.0655	0.0211	0.0113	0.1442	0.0124	-0.052	0.0108	0.1531	51		Note:
2	1	40.9429	0	0	0	0.106	-0.0124	-0.0226	-0.0466	-0.0592	-0.0468	0.0359	-0.0053	-0.0254	0.0018	76		Sex; 1= male, 2=female
3	1	39.9033	0	0	0	0.0651	0.0049	0.1201	0.0633	-0.1083	-0.0239	-0.2307	-0.1562	-0.1198	-0.0156	70
4	2	49.4974	0	0	0	0.112	-0.0067	-0.004	-0.0404	-0.0827	-0.0594	0.0265	-0.0155	-0.0568	0.0031	58
5	2	45.1976	0	0	0	0.0598	0.0779	0.004	0.062	-0.0027	-0.0268	0.0317	-0.0183	-0.0426	-0.0263	68
6	2	37.5696	1	0	0	-0.0253	-0.1143	-0.0171	-0.0287	0.0674	0.0714	0.0657	0.078	-0.0473	-0.0735	21
7	1	42.7009	0	0	0	0.048	-0.0233	-0.1782	0.1814	-0.121	0.0489	-0.0073	0.064	0.1111	0.0911	25
8	2	39.5525	0	1	0	0.0909	0.009	-0.0919	0.0351	-0.057	0.0252	-0.0125	0.0399	0.0643	-0.0036	73
9	2	54.0681	0	0	0	-0.0648	-0.0226	-0.0941	0.0954	-0.0436	0.0212	-0.0285	0.0764	-0.0006	0.0319	45
10	2	52.9404	0	0	0	0.0126	0.0187	-0.0824	0.1208	-0.0946	-0.0272	0.0696	-0.077	0.0545	0.0765	29
11	2	37.8665	0	0	0	0.1338	0.0208	-0.0439	-0.0526	0.0292	-0.0213	0.0115	-0.0007	-0.033	0.0067	64
12	1	44.0098	1	0	0	-0.0906	-0.079	0.0112	-0.0445	0.0352	0.0428	0.0564	0.0053	-0.0271	-0.0392	47
13	2	38.4291	0	0	1	0.0771	-0.0913	0.0017	0.0692	-0.0814	0.1287	-0.0186	0.0779	0.0497	0.0171	73
14	1	35.0268	0	0	0	0.0814	-0.0446	-0.0408	0.0385	-0.0606	-0.0194	0.0668	0.0542	-0.0079	0.0289	29
16	2	44.6811	0	0	0	0.1012	0.0048	-0.0577	-0.0278	-0.0927	0.0058	-0.0103	-0.0673	0.023	0.0505	45
17	1	50.6502	0	0	0	-0.0684	0.0487	-0.0966	0.2399	-0.0801	-0.0491	0.1611	-0.1098	0.0774	0.101	49
18	2	41.4906	0	0	0	0.1036	-0.0347	-0.0131	-0.0577	-0.0647	0.0171	0.001	-0.0395	-0.0216	0.0555	69
19	1	52.38	0	0	0	0.0019	0.0141	-0.037	0.0755	-0.0236	-0.0111	0.0157	-0.053	0.0208	0.0465	7
20	1	38.2534	0	1	0	0.0494	-0.1108	0.0524	0.0138	0.1612	-0.0244	-0.0064	-0.0305	0.0037	-0.0421	54
21	1	49.2186	0	0	0	0.0177	0.0063	-0.0625	0.091	-0.0774	-0.019	0.0722	-0.0667	0.0292	0.089	35
22	2	39.8622	0	0	0	0.0778	-0.036	-0.0045	-0.0382	0.0181	-0.0293	0.0215	-0.0104	-0.0585	-0.0043	65
23	2	43.288	0	0	0	0.129	-0.0167	-0.0335	-0.0756	-0.0867	-0.0714	0.0844	0.0058	-0.0762	0.0095	59
24	2	50.9926	0	0	0	0.0183	-0.0163	-0.1134	0.0669	-0.0524	0.0813	-0.0584	0.1133	0.0308	-0.0839	46
26	1	39.8743	0	0	0	0.1041	-0.0414	0.0185	-0.0371	-0.0115	-0.0832	0.0659	0.0117	-0.0534	-0.0051	54
27	2	39.38	0	0	0	0.0528	-0.0107	-0.1996	0.0501	-0.0617	-0.0035	-0.067	0.0661	0.0737	-0.0801	57
28	1	52.6611	0	1	0	0.015	-0.0397	-0.0145	-0.0576	-0.0259	-0.0095	-0.003	-0.0222	-0.0613	-0.0001	68
29	2	37.871	0	1	0	0.1218	-0.066	0.0072	-0.0333	0.043	-0.0388	0.0198	-0.0043	-0.0027	-0.0179	73
30	1	51.4432	0	0	0	0.0419	-0.0664	-0.1317	0.0318	0.0113	0.0328	-0.0286	0.097	0.0189	-0.0698	29
31	2	62.3737	0	0	1	-0.1216	-0.0828	0.0395	-0.0015	-0.0111	0.1022	0.0541	-0.0375	-0.065	0.1565	34
32	1	41.3109	0	1	0	0.092	-0.0421	0.1804	0.0124	-0.0435	-0.1005	-0.1332	-0.0053	0.0977	0.0869	71
33	2	39.3172	0	0	0	0.1099	0.0152	-0.0336	-0.0306	0.0131	-0.0005	0.0036	0.0168	-0.0196	-0.0013	69
34	2	42.9088	0	1	0	0.0948	-0.1271	0.0738	-0.0144	0.0977	0.0019	0.0334	-0.0251	0.0537	0.0472	60
35	2	36.1778	0	0	0	0.0662	-0.064	-0.0955	-0.0505	0.2399	-0.1022	-0.0497	-0.0301	-0.022	-0.0384	54
36	1	52.2936	0	0	0	0.0272	-0.0517	0.0139	-0.0039	-0.0034	0.0277	0.0046	-0.0024	-0.033	-0.0371	43
37	1	53.4297	0	0	0	0.0081	-0.055	0.0134	-0.0262	0.0551	-0.012	0.02	-0.0139	-0.0204	-0.02	26
38	2	42.8811	0	0	0	0.102	-0.0966	0.0497	-0.0091	0.071	-0.0103	0.0395	-0.0222	0.0333	0.0291	50
39	2	63.9482	0	0	0	-0.0111	-0.0136	-0.0263	-0.0369	-0.0465	0.0276	0.0254	-0.0108	-0.0366	0.0114	54
40	1	58.1232	0	0	0	-0.0059	-0.1031	0.0599	0.014	-0.0249	0.0969	0.012	0.0225	-0.0034	-0.0162	23
41	1	54.6008	0	1	0	-0.0605	-0.0909	0.0328	-0.0084	0.0351	0.0078	0.0267	-0.005	0.0036	0.018	38
42	1	33.5229	0	0	0	0.0242	-0.1233	0.111	0.0256	-0.0318	0.1865	0.0796	-0.0226	0.0716	0.0929	25
43	2	53.9065	0	0	0	0.0235	-0.0395	0.0112	-0.0064	0.0198	0.0258	0.0055	-0.0068	-0.0246	-0.0208	53
44	1	71.943	0	0	0	-0.046	-0.0714	0.0351	-0.0135	0.0291	-0.0021	0.0233	-0.0127	0.0003	0.0203	29
45	2	35.5724	0	1	0	0.0381	-0.1174	0.115	-0.0193	0.0911	-0.0073	0.0062	-0.024	0.1004	0.0572	39
46	2	40.5742	0	1	0	0.0757	-0.1274	0.056	-0.0223	0.1051	0.0008	0.0308	-0.0206	0.0415	0.0315	51
47	2	50.6955	0	0	0	0.0663	-0.1335	0.0399	-0.0303	0.1582	-0.005	-0.0209	-0.0691	0.0097	-0.0484	46
48	2	62.4362	0	0	0	-0.2158	-0.0573	0.0052	-0.026	-0.0259	0.0131	0.0341	-0.0226	-0.1264	0.1071	49
49	2	36.0583	0	0	0	-0.0101	-0.1297	0.0455	0.0173	-0.0041	0.091	0.0227	0.0461	-0.0222	-0.0148	19
50	2	68.5993	0	0	0	-0.0527	-0.0344	0.025	-0.0206	-0.0324	0.0099	0.0233	0.0021	-0.0193	-0.011	42
51	2	63.0743	0	0	0	0.0245	-0.0598	0.0253	-0.0306	0.0138	0.013	0.0075	-0.0047	-0.0269	-0.0013	11
52	2	49.252	0	1	0	0.0108	-0.0686	0.0478	-0.0321	0.0154	0.0252	0.012	-0.0219	-0.0276	0.005	16
53	2	47.1854	0	0	0	0.0539	-0.077	0.0405	0.0225	-0.0582	0.0873	0.0557	0.0332	0.0143	0.0019	39
54	1	53.4396	0	1	0	-0.1297	-0.066	0.0355	-0.0007	-0.044	0.0676	0.0373	0.03	-0.0087	0.0479	14
55	2	44.3053	0	0	0	0.0671	-0.0467	0.0786	0.007	-0.0157	0.0635	0.0212	-0.0029	0.0187	0.0027	15
56	2	47.0797	0	0	0	0.0674	-0.1437	0.1262	0.0173	0.0171	0.1314	0.0586	-0.0201	0.0425	-0.0005	38
57	1	46.6535	0	0	0	0.0745	-0.0564	0.0828	0.0177	0.0019	0.0467	0.0238	-0.0149	0.0096	-0.0176	17
58	2	41.3056	0	1	0	0.068	-0.1344	0.0751	-0.0296	0.0743	0.0377	0.0281	-0.0275	-0.0137	-0.032	58
59	2	47.6955	0	1	0	0.0044	-0.139	0.0916	-0.0244	0.0556	0.0605	0.0162	-0.0441	-0.0025	-0.0189	40
60	1	54.7322	0	0	1	-0.1025	-0.0591	0.0343	-0.0086	-0.0179	0.072	0.0417	-0.0216	-0.035	0.1104	40
61	1	40.6648	0	1	0	0.0904	-0.1058	0.068	-0.0089	0.0825	-0.0054	0.0435	-0.0278	0.0364	0.0318	66
62	1	40.7403	0	0	0	0.1013	-0.1069	0.0295	-0.0465	0.0493	-0.0776	0.0067	0.002	0.0145	0.0285	55
63	1	47.8704	0	1	0	-0.0755	-0.1196	-0.039	-0.0361	0.0741	0.0414	0.039	0.0986	-0.0693	-0.0732	41
64	2	56.7831	0	0	0	0.0081	-0.0711	0.0021	-0.0454	0.0966	-0.0083	0.0172	-0.0896	-0.0064	-0.1129	44
65	2	57.9912	0	0	0	-0.0412	0.0203	-0.0171	-0.0466	0.0201	0.0214	0.0137	0.0045	-0.0663	-0.0166	33
66	1	47.0414	0	0	0	0.1011	-0.0108	-0.029	-0.0439	-0.0613	-0.0267	0.0255	0.0077	-0.0345	-0.0032	45
67	1	47.2087	0	0	0	0.0407	-0.0851	-0.1443	0.028	0.0041	0.0479	-0.0292	0.1132	0.0285	-0.1116	22
68	2	38.6427	0	0	0	0.024	-0.1042	0.0053	-0.0712	0.0712	-0.089	0.0782	0.0209	-0.074	0.0263	40
70	2	37.3244	0	1	0	0.0721	-0.1281	-0.0039	-0.0666	0.0864	-0.0852	0.0638	-0.002	-0.0552	0.0126	84
71	2	42.5416	0	0	0	0.0905	-0.0755	-0.0016	-0.0498	0.0743	-0.0454	0.0322	-0.0139	-0.0053	-0.0004	52
72	2	53.5568	0	1	0	-0.0287	-0.0482	-0.0189	-0.0759	-0.0564	-0.0487	0.0446	0.0271	-0.0512	0.0569	64
73	1	40.2211	0	1	0	-0.0094	-0.054	0.0117	-0.0287	-0.0026	-0.018	0.0175	0.0072	-0.0232	0.0268	68
74	1	46.0829	0	0	0	0.0682	-0.0115	0.0082	-0.0583	-0.036	-0.0217	0.0483	0.0234	-0.0759	0.0289	63
75	1	44.9218	0	0	0	0.0068	-0.0011	0.0141	-0.0197	0.149	0.0028	0.0008	0.0324	-0.0322	-0.045	51
76	1	44.7105	0	0	1	0.0954	-0.1118	0.0104	-0.0573	0.0969	-0.0448	0.0463	-0.0299	0.0189	-0.0094	51
77	2	41.2256	0	0	0	0.0541	-0.0503	-0.049	-0.0008	0.0955	-0.0475	0.009	0.0558	-0.0537	0.0009	16
78	1	40.5131	0	1	0	0.0037	-0.0324	-0.0004	-0.0944	0.0013	-0.1251	0.1318	0.1004	-0.0578	-0.0422	42
79	1	41.0132	0	1	0	0.0364	-0.0336	0.0038	-0.072	-0.0479	-0.0709	0.1273	0.1184	-0.0777	-0.055	14
80	1	54.3867	0	0	1	-0.0302	-0.049	0	-0.0518	-0.011	-0.0844	0.0585	0.0136	-0.0648	-0.0006	10
81	1	33.9671	0	2	0	0.0303	-0.0189	-0.0183	-0.0448	-0.0435	-0.0546	0.0777	0.0876	-0.0383	-0.0296	10
82	1	39.1512	0	0	0	0.1238	-0.0781	-0.0147	-0.0802	0	-0.1399	0.1264	0.0504	-0.1002	-0.0038	69
83	2	33.8647	0	1	0	-0.1307	0.0336	0.0084	-0.0973	-0.0131	-0.0955	0.0976	0.136	0.0085	-0.0683	61
84	2	55.0178	0	0	0	0.0016	-0.0289	-0.0221	-0.0375	-0.0428	-0.0363	0.0387	-0.032	-0.0588	-0.0334	28
85	2	39.4742	0	0	0	0.1148	-0.0261	-0.026	-0.0729	-0.0833	-0.0763	0.059	-0.0172	-0.0558	-0.0256	11
86	2	42.9406	0	0	0	0.1114	-0.0447	-0.0092	-0.0541	-0.0364	-0.0736	0.0431	-0.023	-0.0624	-0.0189	58
87	2	50.2055	0	0	0	0.0208	-0.1078	0.063	-0.0074	0.0425	0.0337	0.0154	-0.027	0.024	0.0123	43
88	2	51.6184	0	0	0	-0.0585	-0.1	0.0663	0.0069	0.0136	0.0427	-0.0123	-0.0276	-0.0063	0.0382	15
89	1	63.5432	0	0	0	-0.1486	-0.0565	0.0207	0.0018	0.0004	0.0294	-0.0108	-0.0086	-0.0351	0.0262	40
90	2	54.1854	0	0	0	-0.0673	-0.0791	0.0421	-0.0012	0.0165	0.0387	0.0028	-0.0261	-0.014	0.017	13
91	2	46.0129	0	0	0	0.0985	-0.0404	-0.0208	0.0198	-0.0626	-0.0009	0.0285	0.0218	-0.004	-0.0003	17
92	2	46.816	0	1	0	0.0643	-0.065	0.1368	-0.0195	-0.0731	-0.0185	-0.1289	-0.0093	0.089	0.0711	43
93	2	37.8691	0	1	0	0.0659	-0.0443	0.1331	-0.0132	-0.0387	-0.0334	-0.0896	0.012	0.0948	0.083	19
94	1	43.3795	0	1	0	0.0687	-0.0273	0.1165	0.0129	-0.0066	-0.0392	-0.0563	-0.0093	0.0787	0.0678	54
95	2	49.5491	0	0	0	-0.0557	0.0296	0.0342	-0.01	-0.0322	0.0265	-0.1012	-0.0856	-0.0743	0.0597	16
96	2	41.487	1	0	0	-0.0942	-0.0267	0.0489	0.0175	-0.099	-0.0003	-0.1611	-0.1013	-0.1114	0.0208	18
97	2	41.8457	0	1	0	-0.0585	0.0507	0.0679	-0.0063	-0.0296	0.0452	-0.1663	-0.1483	-0.1163	0.094	14
98	1	45.608	0	0	0	-0.0197	-0.0232	-0.0448	0.0807	-0.064	0.0569	0.0207	0.0034	0.0219	-0.001	25
99	1	45.928	0	0	0	-0.0095	-0.0294	-0.0697	0.0896	-0.0905	0.0842	0.0121	0.0388	0.0483	-0.0023	13
100	2	46.9787	0	0	0	-0.0131	-0.0341	-0.0616	0.0791	-0.0668	0.0796	0.013	0.0185	0.0359	0.0037	14
101	2	40.7651	0	0	0	0.1079	-0.0057	0.0402	-0.0386	-0.1328	-0.1365	0.0827	0.0267	-0.1014	0.0403	25
102	2	43.6816	0	0	0	0.0406	0.015	-0.0771	0.0806	0.0095	-0.0291	-0.0696	-0.0127	0.0538	0.0063	49
103	2	52.3447	0	1	0	-0.028	0.0293	0.2162	0.0067	-0.0269	-0.1055	-0.1531	0.1334	0.2012	-0.0054	28
104	2	39.0893	0	0	0	0.0387	-0.0295	-0.0678	-0.0244	0.0971	-0.0145	-0.0341	-0.0117	-0.0346	-0.0415	50
105	1	44.5003	0	0	0	0.0498	-0.0234	-0.0885	0.0112	0.0407	0.0552	-0.053	0.0361	-0.053	-0.07	13
106	2	49.6725	0	0	0	0.084	-0.0276	0.0651	0.0061	-0.0541	-0.0473	-0.0746	-0.0644	-0.087	-0.0134	28
107	1	41.7628	0	0	0	0.084	-0.0211	0.0176	-0.0379	-0.0516	-0.1045	0.1017	0.0507	-0.0642	0.0054	82
108	2	42.54	0	0	0	-0.0013	0.0572	0.1246	0.1313	0.1304	0.0218	-0.0525	0.0757	0.0141	-0.0423	75
109	2	37.3569	0	1	0	0.109	-0.0511	0.0126	-0.0397	-0.0051	-0.0903	0.0749	0.0235	-0.0481	-0.0028	46
110	2	45.137	0	1	0	-0.0435	-0.0485	0.0135	-0.0268	-0.0108	-0.0545	0.0391	0.0107	-0.039	0	13
111	2	42.9378	0	0	0	0.0637	0.0728	0.0148	0.0022	0.0122	0.0166	0.0158	-0.0537	0.0051	-0.0246	39
112	1	41.2099	0	0	0	0.0647	-0.0115	0.0033	-0.028	0.0005	-0.0265	0.0317	-0.0431	0.1048	-0.0089	73
113	1	45.9082	0	0	0	0.0675	0.0416	-0.036	0.0553	-0.0818	-0.0041	-0.106	-0.0944	-0.1465	-0.1441	37
114	1	46.3273	0	0	0	0.0723	0.0699	0.0089	-0.0223	-0.0222	-0.0052	0.0344	-0.0549	0.0228	-0.0403	18
115	2	44.2113	0	0	0	-0.092	0.0172	0.0856	-0.0275	-0.0117	-0.058	-0.0354	0.1049	0.0819	-0.0402	18
116	1	54.7444	0	0	0	0.0667	0.1133	0.0129	0.0358	0.0244	0.0057	0.0579	-0.045	-0.0756	-0.066	49
117	2	44.2919	0	0	0	0.0785	0.0379	-0.029	0.0212	-0.0607	-0.0417	0.0485	-0.0503	-0.0353	-0.0073	77
118	1	37.5217	0	0	0	0.0504	0.0613	-0.0082	0.0115	-0.085	-0.0263	0.0393	-0.0333	-0.0137	-0.0261	78
119	2	41.5598	0	0	0	0.0775	0.0115	0.0435	0.0323	-0.0338	-0.0068	-0.0872	-0.043	-0.0472	-0.0201	37
120	2	48.0865	0	0	0	-0.0895	-0.1028	-0.1644	0.0129	0.1617	-0.1475	-0.1254	-0.0207	0.0383	0.0521	18
121	2	42.5468	0	0	0	0.0154	-0.1118	-0.2242	0.0474	0.2112	-0.1946	-0.1625	-0.0284	0.0577	0.029	40
122	2	49.2637	0	0	0	-0.0241	0.0465	-0.0397	0.0596	-0.0807	0.0371	-0.1486	-0.2183	-0.0532	-0.0684	49
123	2	39.8421	0	0	0	0.1223	-0.0658	-0.0093	-0.0604	0.0017	-0.1026	0.0884	0.0364	-0.072	0.0027	48
124	2	39.3842	0	0	0	0.0425	0.0093	0.0375	0.1404	0.007	-0.0722	0.1733	-0.0821	0.0228	0.0157	66
125	1	58.04	0	0	0	-0.0312	0.035	-0.0195	-0.0532	-0.0612	-0.0883	0.0131	0.0798	0.0576	-0.0657	39
126	2	48.0746	0	0	0	0.0477	-0.0584	-0.0748	0.1469	-0.1054	0.0966	0.0327	0.0779	0.0719	0.0324	49
127	1	45.6747	0	0	0	0.0723	0.0457	-0.0375	0.0154	-0.0529	-0.0362	0.0555	-0.0505	-0.0286	-0.0201	73
128	1	47.9236	0	0	0	-0.0413	-0.0306	-0.0575	0.0795	-0.0652	0.0513	0.0084	0.0208	0.0235	0.0151	17
129	1	46.9819	0	0	0	-0.0195	-0.029	-0.0571	0.0834	-0.0691	0.0701	0.0145	0.0347	0.0436	-0.0069	16
130	1	59.2438	0	0	0	-0.0946	-0.0006	-0.0391	0.0084	-0.0336	0.0263	-0.0022	-0.0314	-0.0067	-0.0328	54
131	2	38.5982	0	0	0	0.0482	0.1105	0.1114	0.0583	0.0581	-0.0163	-0.0319	0.0934	0.0528	-0.0498	84
132	1	49.2327	1	0	0	-0.1669	0.0584	0.0737	-0.0907	-0.0192	-0.1069	-0.0101	0.1704	0.1531	-0.0766	85
133	2	41.4646	0	0	1	0.048	0.0004	0.0431	0.0478	0.0259	0.0583	-0.0501	-0.1189	0.0142	-0.1169	33
134	1	50.4204	0	0	0	0.0827	0.0036	0.0631	0.049	-0.0588	-0.1071	0.1441	-0.0161	-0.0161	0.0556	21
135	1	61.3329	0	0	1	-0.1224	0.0234	-0.0019	-0.028	0.0134	0.0416	0.0024	-0.0037	0.0072	0.1226	29
136	1	54.1428	0	0	0	0.021	0.0454	0.0334	-0.0147	-0.0124	-0.0344	0.0105	0.0663	0.0202	-0.0489	26
137	2	50.9738	0	0	0	0.0951	0.0049	0.0675	-0.0237	-0.1113	-0.1702	0.1104	0.0572	-0.0779	0.0633	49
138	2	53.3513	0	0	0	0.106	0.1024	-0.0369	-0.0972	-0.0072	0.0281	0.0059	0.0182	0.0113	0.0883	44
139	2	42.3484	0	0	0	0.0197	-0.0002	0.1461	0.0707	-0.0404	-0.0109	-0.1992	-0.0993	-0.0233	-0.0467	35
140	2	53.7153	0	0	0	-0.0668	0.1032	0.0674	0.2845	0.1427	-0.0284	0.1958	-0.0704	-0.0016	-0.0922	85
141	2	40.1329	1	0	0	0.0165	0.0402	-0.0269	-0.0231	-0.0633	-0.0673	0.018	0.0009	0.0243	-0.0317	44
142	2	36.4611	0	0	0	0.059	0.0402	-0.0028	0.057	0.0131	0.0024	-0.0336	0.0076	0.0147	-0.0057	82
143	1	50.0904	0	0	0	0.0106	0.0497	-0.0296	-0.0283	-0.0729	-0.0772	0.0361	0.0453	0.0269	-0.0507	27
144	2	38.6782	0	0	0	0.0492	0.0261	-0.1711	0.0488	-0.0736	-0.0623	-0.0619	-0.0456	0.062	0.0281	35
145	1	57.1722	0	1	1	-0.0015	0.036	-0.0203	-0.0651	0.0326	0.0475	0.0065	0.0045	-0.0496	0.0423	28
146	2	48.6849	0	0	0	0.0885	0.0107	0.0705	0.061	-0.0659	-0.1566	0.1738	-0.0208	-0.0099	0.0798	24
147	2	41.5007	0	0	0	0.029	-0.0606	-0.2084	0.0462	0.1597	-0.1423	-0.1422	-0.0167	0.043	0.0149	44
148	1	40.4266	0	0	0	0.0103	0.0275	-0.0814	0.0979	-0.0844	-0.0299	0.0756	-0.1018	0.0498	0.0785	31
149	2	37.224	0	1	0	0.0864	-0.1097	0.0043	-0.011	0.018	0.0016	0.0314	0.0648	-0.0437	-0.0066	13
150	2	42.0033	0	1	0	0.0942	-0.0936	0.0182	-0.0236	0.0133	-0.0141	0.029	0.0443	-0.0295	-0.0009	18
151	1	61.9491	0	0	0	-0.0867	0.0772	0.0528	0.1883	0.0889	-0.0201	0.1265	-0.0587	0.0221	-0.0396	82
152	1	51.0481	0	0	0	-0.0388	0.0463	0.1156	0.1683	0.0749	-0.0388	0.1597	-0.0055	0.0401	-0.1023	42
153	1	40.3587	0	0	0	0.0633	-0.0403	-0.0252	-0.0228	0.0072	-0.0439	0.0195	-0.0166	-0.014	-0.0722	52
154	1	45.5719	0	0	0	0.0721	-0.067	-0.0301	-0.0213	0.0297	-0.0567	-0.0119	-0.0221	0.01	-0.0672	79
155	1	47.1954	1	0	0	0.0135	-0.0131	-0.0089	-0.0507	-0.0313	-0.0798	0.0004	0.0248	0.0286	-0.0712	36
156	1	39.8109	0	0	1	0.0529	0.0642	0.0088	-0.008	0.0156	0.0279	0.0035	-0.0302	-0.0078	0.0014	22
157	1	44.3811	0	0	0	-0.0562	0.0781	0.0969	-0.0177	0.0075	-0.0641	-0.0326	0.1365	0.1026	-0.0461	51
158	2	42.0372	1	0	0	-0.0469	0.0547	-0.0223	-0.0701	-0.0884	-0.1208	0.0182	0.1029	0.0827	-0.0926	53
159	2	42.5066	0	1	0	0.0068	0.0137	-0.1237	0.1711	-0.065	-0.0013	0.0451	0.0152	0.0623	0.0712	28
160	2	39.4476	0	1	0	0.1117	-0.0336	-0.043	-0.0342	-0.1104	0.0212	0.0618	0.1172	-0.023	0.0085	23
161	1	41.749	0	1	0	0.0556	-0.1093	0.026	0.0726	-0.1204	0.1952	-0.0526	0.1043	0.0214	-0.0314	68
162	1	44.1003	0	1	0	0.0994	-0.0666	-0.001	0.0035	-0.103	0.0595	0.0255	0.0555	-0.0165	-0.0135	36
163	1	47.728	0	0	0	0.0962	0.0079	-0.0513	0.0448	-0.0877	-0.0222	0.0169	0.0493	0.0276	0.0789	80
164	1	47.1509	0	0	0	-0.0368	0.05	-0.0648	-0.0149	-0.0046	-0.0316	0.1331	-0.1859	0.2331	-0.1897	60
165	1	74.8486	0	0	0	-0.0212	0.0618	0.0519	0.1907	0.051	-0.0455	0.0518	-0.0555	0.0003	0.0557	38
166	1	49.2219	0	0	0	0.0945	-0.0678	-0.0037	0	-0.116	0.061	0.0149	0.0688	-0.0289	-0.0131	19
167	2	33.049	0	1	0	0.0801	-0.089	-0.0132	-0.0841	0.1614	-0.0075	0.015	0.0212	-0.017	-0.0196	78
168	1	46.6418	0	0	0	0.112	-0.0418	-0.0196	-0.0429	0.0324	-0.0434	0.0272	-0.0157	-0.0124	0.0176	25
169	1	56.9513	0	0	0	-0.007	0.0177	-0.1961	0.208	-0.0737	-0.0628	0.0032	-0.0633	0.128	0.127	45
170	1	32.1284	0	1	0	0.0983	-0.0231	-0.031	-0.0564	0.029	-0.0253	0.0126	0.0041	-0.0096	-0.0032	41
171	1	39.5548	0	0	0	0.0807	-0.1184	0.0096	0.0124	0.0014	0.1121	0.0189	0.0242	0.0107	-0.0056	24
172	2	41.6596	0	0	0	0.1364	-0.0184	-0.0245	-0.0716	-0.0784	-0.067	0.0769	0.0255	-0.0654	0.0128	39
173	2	38.7528	0	1	0	0.0874	-0.0326	-0.0454	0.0098	-0.1045	0.0728	0.024	0.1011	-0.0105	-0.0006	7
174	2	49.988	0	0	0	-0.0313	0.028	-0.0709	0.0043	-0.0614	0.012	-0.0424	-0.0938	0.0077	0.0287	77
175	1	49.0728	0	1	0	-0.0759	-0.0007	-0.0628	0.0695	-0.0361	-0.0053	0.0294	0.0085	0.0243	0.0395	10
176	1	41.1204	0	1	0	0.0467	-0.0093	-0.0063	0.0676	-0.0383	0.1068	-0.0267	0.1213	-0.007	-0.0402	71
177	2	45.8207	0	0	0	0.0051	0.0227	-0.1256	0.2152	-0.0664	0.0003	0.071	-0.0079	0.0618	0.1022	25
178	1	31.205	0	1	0	0.0878	-0.0597	-0.0215	-0.0579	0.0562	0.0011	0.0114	0.0103	-0.0315	-0.0202	53
179	2	45.7707	0	0	0	-0.0631	-0.0192	-0.0084	-0.0148	0.0367	0.0025	-0.0123	-0.0139	-0.0302	0.0321	70
180	2	47.4431	0	0	0	0.1197	0.0462	-0.0234	-0.0375	0.0248	0.0564	0.0081	-0.0122	-0.0411	0.002	69
181	1	43.2201	0	1	0	0.0777	-0.1204	0.0766	0.0028	0.0772	0.0247	0.0348	-0.0325	0.0232	-0.0037	42
182	1	47.8768	0	1	0	-0.0188	-0.0668	0.0352	-0.0392	0.0211	0.06	0.0395	-0.0258	-0.0205	0.0405	13
183	1	48.1077	0	1	0	-0.0173	-0.0835	0.0316	-0.0573	0.0082	0.089	0.0645	-0.0362	-0.0162	0.0518	10
184	1	42.0399	0	0	0	0.0336	-0.0081	-0.0039	-0.0473	-0.0084	0.0138	0.0228	-0.0075	-0.0282	0.0593	9
185	1	31.8727	1	1	0	-0.045	-0.0767	0.0299	-0.035	0.001	0.0762	0.0546	-0.0112	-0.0023	0.0427	21
186	1	37.3184	0	0	0	0.1044	-0.0594	0.0058	-0.0013	-0.0175	0.0582	0.0083	-0.0087	0.0078	-0.003	39
187	2	41.3264	0	0	0	0.0142	0.0968	-0.0019	0.0526	0.0526	0.0086	-0.0238	0.0716	-0.0293	0.041	44
188	2	41.4922	0	2	0	0.055	-0.0694	0.0465	-0.041	-0.0127	0.0861	0.0368	-0.0337	0.0115	0.1033	53
189	1	43.3488	0	0	0	0.0512	0.0196	0.062	0.0516	-0.0621	0.019	-0.1802	-0.1105	-0.1335	-0.109	93
190	2	38.5553	0	1	0	0.0543	-0.0102	0.1435	0.0355	-0.0502	-0.0648	-0.1615	-0.0621	0.0062	0.0692	93
191	2	50.6315	0	0	0	0.0441	0.0156	-0.0541	-0.0098	-0.0601	-0.0039	-0.0077	-0.0616	0.0012	-0.0202	43
192	1	54.6513	0	0	0	0.0535	0.0123	0.0951	0.0498	-0.0579	-0.0344	-0.1881	-0.0976	-0.086	-0.0337	64
193	1	39.3392	0	1	0	0.0572	-0.016	-0.2548	0.0753	-0.0727	-0.0395	-0.1096	0.0543	0.1152	-0.0717	62
194	1	42.4685	0	0	0	-0.0087	0.0118	-0.1666	0.1597	-0.0575	-0.0461	0.008	-0.0503	0.0904	0.0743	36
195	2	36.1145	0	1	0	0.006	0.0041	-0.0098	-0.0434	-0.0684	-0.0236	-0.0383	-0.0413	-0.0434	-0.0113	86
196	1	56.3786	0	0	0	0.0411	-0.1127	0.0015	0.0045	0.1118	0.0318	-0.0103	0.0373	0	-0.0307	29
197	1	44.1621	0	0	0	0.0815	-0.1083	0.032	0.0508	-0.0555	0.14	-0.0213	0.0702	0.0259	-0.0089	72
198	2	41.9216	0	0	0	0.0699	-0.1501	0.1356	0.0272	0.0108	0.0843	0.0251	-0.0005	0.0025	-0.0175	42
199	1	36.1665	0	1	0	-0.0067	-0.0703	-0.0835	0.0712	-0.076	0.218	-0.0298	0.1827	-0.0131	-0.0775	63
200	2	47.278	0	0	0	-0.0281	-0.109	-0.1562	0.0348	0.1784	-0.1605	-0.1354	-0.0382	0.0345	0.0129	23
201	1	42.0897	0	0	1	-0.0181	0.0793	0.0536	-0.0009	0.0255	0.0189	0.0254	0.0008	-0.0161	-0.1069	15
202	1	39.459	1	0	1	-0.0185	0.0682	0.0382	-0.0038	0.0072	0.0142	0.0304	0.001	-0.0217	-0.0971	19
203	1	22.4441	2	0	0	-0.0057	0.1046	0.076	0.0111	0.0511	-0.026	-0.0017	0.0831	0.0141	-0.1417	28
204	1	58.817	0	0	0	-0.117	-0.0326	-0.0952	0.0067	-0.0537	-0.005	-0.0066	0.0417	-0.0135	-0.0483	6
205	2	53.3712	0	0	0	-0.0514	-0.0191	-0.1001	0.0206	-0.0507	0.0034	-0.0278	0.0459	0.0203	-0.0486	34
206	2	40.9058	0	1	0	0.0875	-0.0575	-0.0274	-0.0154	-0.0599	0.041	0.0546	0.0758	-0.0257	0.0078	35
207	2	39.0487	0	0	1	0.073	0.0546	-0.0075	0.0165	0.0021	0.0435	-0.0334	0.0374	-0.0733	-0.0656	25
208	1	36.0776	0	1	2	-0.0863	0.0591	-0.0197	-0.0763	0.014	0.0613	0.006	-0.0501	0.0554	0.029	50
209	2	49.6673	0	0	0	-0.114	0.0011	-0.0169	0.0207	-0.0022	-0.0207	0.0099	0.0283	-0.0887	-0.0128	10
211	1	65.9921	0	0	0	-0.1311	0.0271	-0.0259	-0.0134	0.0126	0.0611	-0.0178	-0.0017	-0.0207	0.0969	53
212	1	48.5892	1	0	0	-0.0935	0.0655	0.1395	-0.0276	0.0007	-0.1074	-0.0704	0.1945	0.2061	-0.0741	68
213	2	38.0043	1	0	0	0.0417	0.1127	0.0657	0.0386	0.0521	0.019	0.0289	-0.0018	-0.0663	-0.219	51
214	1	41.1379	1	1	0	-0.1595	0.0764	0.0501	-0.095	-0.019	-0.0571	0.0135	0.1116	0.2027	-0.0514	60
215	2	41.3606	1	0	0	-0.0403	0.0976	0.0713	-0.0007	0.0927	-0.0213	0.0139	0.0917	0.0304	-0.1774	13
216	1	42.8227	0	0	0	-0.0309	0.08	0.0554	0.0008	0.0861	-0.0046	0.0143	0.0582	0.0019	-0.1346	15
217	1	47.6215	0	0	0	0.0111	0.0714	0.0042	0.1685	0.0831	0.0589	-0.027	0.1711	-0.0651	-0.0958	39
218	1	75.4958	0	1	0	-0.16	-0.0026	0.008	0.1174	0.0314	-0.0327	0.0441	-0.0459	-0.076	0.0564	8
219	2	44.2991	0	0	0	0.0339	0.1106	0.0783	0.1397	0.1063	-0.0212	0.1003	-0.0322	-0.0773	-0.0367	52
220	1	40.8408	0	1	1	0.044	-0.0304	0.097	-0.0311	0.0007	-0.0136	0.0277	-0.1196	0.1215	-0.0705	64
221	2	52.6748	1	0	1	-0.1384	0.0163	0.0145	0.0542	0.0139	0.0354	-0.0125	0.139	-0.0518	-0.0955	12
222	1	38.2656	1	0	0	-0.0577	0.0894	0.0817	-0.0344	0.0127	-0.0502	-0.0268	0.1314	0.0999	-0.0619	56
223	2	34.9438	1	1	0	-0.0057	0.0472	0.1355	-0.0622	-0.1608	-0.1211	-0.1167	-0.041	0.0237	-0.1272	58
224	2	42.0148	0	0	1	-0.019	0.0484	0.0602	-0.063	-0.0861	-0.0834	-0.0661	-0.017	-0.0379	-0.066	10
225	1	54.2622	0	0	1	-0.0345	0.0172	0.0491	-0.048	-0.0641	-0.043	-0.0533	-0.0063	-0.0223	-0.029	11
226	1	46.9529	1	0	0	-0.0672	0.0577	0.1541	-0.0452	-0.0777	-0.1208	-0.1027	0.0928	0.1251	-0.1046	28
227	2	47.3868	0	0	0	-0.1395	0.0083	-0.0373	-0.0242	-0.0057	-0.0256	0.0979	-0.127	0.1367	-0.1334	50
228	2	42.9269	0	0	0	0.0175	-0.0403	0.0827	-0.0386	-0.0543	-0.0241	-0.017	-0.018	0.0007	-0.0565	20
229	2	48.3463	0	1	0	-0.0782	0.009	0.0391	0.0184	0.0065	-0.0148	0.0277	-0.0365	-0.0144	-0.0289	7
230	2	35.1332	0	1	0	0.0446	0.0492	0.089	0.0523	0.0371	-0.0137	0.0659	-0.0661	0.0188	-0.0622	26
231	2	58.4622	0	0	0	-0.047	-0.0192	0.0431	-0.0343	-0.0986	-0.1276	0.0689	0.0337	-0.0923	0.0679	22
232	2	57.788	0	0	0	0.099	-0.0061	0.058	-0.0285	-0.0991	-0.1507	0.0917	0.051	-0.0702	0.0628	40
233	1	36.753	0	1	0	0.0127	-0.0006	-0.012	0.0001	-0.0474	-0.0418	-0.0342	-0.0614	-0.1218	-0.1321	38
234	2	49.1801	0	0	0	-0.0877	-0.011	0.0167	0.0679	-0.0411	0.0021	-0.098	-0.078	-0.1331	0.0136	25
235	2	46.6042	0	1	0	0.0282	0.0156	0.0387	0.0982	-0.052	0.0055	-0.1307	-0.0931	-0.0767	0.01	61
236	1	54.1271	1	0	0	-0.0138	0.0768	0.0148	-0.05	-0.0485	-0.0332	-0.0034	0.1164	0.0442	-0.0466	16
237	2	53.3883	0	0	0	0.0382	0.078	0.0616	0.1291	0.0764	-0.0148	0.0967	-0.026	-0.038	-0.0275	30
238	1	55.6844	0	0	0	0.0569	0.0144	0.0862	0.1789	0.0717	0.0048	0.1286	-0.0392	0.0063	-0.012	12
239	2	55.585	0	0	0	0.0314	0.0204	0.0702	0.1399	0.0663	-0.0107	0.1111	-0.0517	-0.0208	-0.0204	10
240	2	54.4102	0	0	0	0.0215	0.026	0.0414	0.1436	0.0591	-0.0073	0.1132	-0.0469	0.0006	-0.0071	8
241	1	41.8158	0	1	0	0.1225	-0.0118	-0.0708	0.04	-0.0886	0.0069	-0.0161	0.0954	0.0119	0.0366	73
242	2	45.3791	0	0	0	0.0916	-0.129	0.0464	-0.0484	0.0547	-0.0618	0.0366	-0.0048	0.0167	0.0757	47
243	1	53.519	0	0	0	-0.0043	0.0315	-0.0518	0.0501	-0.0836	0.0246	-0.111	-0.1526	-0.0514	-0.0399	57
244	1	53.0046	0	0	0	0.0769	-0.0012	-0.0151	-0.0951	0.0706	0.036	0.0316	-0.06	0.0584	0.0299	17
245	1	40.7215	0	0	1	0.048	0.1375	-0.0797	-0.1526	0.0639	0.121	0.0325	-0.1057	0.0786	-0.0234	51
246	2	50.7665	0	0	0	0.1063	0.0313	-0.0251	-0.0281	-0.0513	0.0165	-0.0038	0.0432	-0.024	-0.0252	33
247	1	54.7599	0	0	0	-0.0177	0.0574	0.019	-0.0266	-0.0421	-0.0279	0.006	0.0779	0.0329	-0.0246	10
248	1	46.9836	0	0	1	0.0765	0.0118	-0.0085	-0.0958	0.0656	0.0404	0.0336	-0.0536	0.0424	0.0348	11
249	1	37.7022	0	0	1	0.0703	0.0092	-0.0142	-0.098	0.0755	0.0374	0.0344	-0.0358	0.0208	0.0328	25
250	2	45.2882	0	0	0	0.0386	0.056	0.0057	0.1149	-0.0386	-0.0211	0.0301	0.0547	-0.0048	0.1089	66
251	1	49.1611	1	0	0	-0.0166	0.053	0.0123	-0.0282	-0.038	-0.0252	0.0057	0.0774	0.017	-0.0286	9
252	2	38.3254	0	0	0	0.0027	0.0171	-0.0463	0.0292	-0.0345	0.0278	-0.0311	0.0041	0.0113	-0.0142	54
253	1	30.9466	0	1	0	0.043	0.024	-0.0536	-0.104	-0.0609	0.0157	0.058	-0.114	0.1004	-0.0758	52
254	1	28.6792	0	1	0	-0.0155	0.0038	-0.0141	-0.0615	-0.046	0.009	0.0071	-0.1011	0.0433	-0.0844	18
255	1	50.2504	0	0	0	-0.0475	-0.0025	-0.0235	-0.0778	-0.0606	0.0205	0.0455	-0.1396	0.1034	-0.1269	17
256	2	37.8894	0	1	0	0.0478	0.048	-0.0095	-0.0017	-0.0863	-0.0129	-0.0403	-0.1219	-0.0263	-0.0827	39
257	2	41.4276	0	0	0	0.0166	0.0489	0.0136	0.1413	-0.01	-0.0458	0.0223	-0.1027	-0.0239	-0.0158	13
258	2	45.6436	0	0	0	-0.0816	-0.0182	0.0306	-0.0068	-0.0318	0.019	-0.0254	-0.0631	-0.0081	-0.0679	55
259	1	42.6472	0	1	0	-0.0084	0.0029	-0.0131	-0.0401	-0.0531	0.0232	0.0111	-0.0979	0.0588	-0.0751	20
260	1	43.7811	0	0	0	0.0319	-0.0235	-0.0937	0.0702	-0.0606	0.0817	-0.0647	0.1146	0.0446	-0.0578	40
261	1	45.5132	0	1	0	0.0554	-0.0155	-0.0964	0.0495	-0.0651	0.0573	-0.0553	0.0874	0.0526	-0.0588	33
262	1	45.3862	-9	0	0	-0.0147	-0.04	-0.1359	0.0168	0.0828	-0.0829	-0.0886	-0.0088	0.0287	0.0053	17
263	1	56.6684	0	0	0	-0.0537	-0.0209	-0.0905	0.004	-0.0255	-0.0105	-0.0227	0.0207	0.0042	-0.0248	15
264	1	52.3206	0	0	0	-0.0896	-0.0848	-0.1406	0.0042	0.1697	-0.1388	-0.129	-0.0109	-0.0121	0.0319	19
265	1	45.4879	0	0	0	-0.0184	-0.0311	-0.1448	0.023	0.0883	-0.0985	-0.0946	-0.0098	0.0274	0.0262	21
266	1	52.2815	0	0	0	0.0012	-0.01	-0.0564	-0.0067	-0.0008	-0.0279	-0.0188	-0.0146	-0.0149	0.0232	6
267	1	62.3182	0	0	0	-0.0661	-0.0236	-0.0717	-0.0027	0.0081	-0.0403	-0.0366	-0.0012	0.004	0.026	49
268	2	56.2418	0	0	0	-0.0167	-0.049	-0.1787	0.0287	0.1316	-0.1329	-0.116	-0.0032	0.0275	0.0298	24
269	1	38.9983	0	1	0	0.0652	-0.0089	-0.1905	0.052	-0.0678	-0.0229	-0.077	0.0664	0.0792	-0.052	60
270	1	38.1909	0	0	1	0.0573	-0.013	0.0257	0.025	0.0074	0.0427	-0.0239	-0.0631	0.0224	-0.0601	45
271	1	45.1416	0	0	0	0.1018	0.0044	0.0406	-0.025	-0.1155	-0.0918	0.0417	0.0149	-0.0605	0.0344	23
272	2	39.9335	0	0	0	0.1033	-0.0043	-0.0015	-0.041	-0.0884	-0.0706	0.0205	-0.0157	-0.0589	0.0002	51
273	1	36.7979	0	1	0	-0.0159	0.0085	-0.0394	0.0159	-0.0504	-0.0131	0.0179	0.0148	0.0251	0.0679	52
274	2	37.2995	0	0	0	0.0494	-0.02	0.0733	-0.0045	-0.0119	-0.025	-0.0517	-0.0292	0.1069	0.0193	48
275	1	43.5742	0	0	0	0.098	-0.0029	0.0735	-0.0209	-0.108	-0.1491	0.0821	0.0463	-0.0661	0.0679	55
276	1	48.353	0	1	0	0.002	-0.0614	-0.0564	0.043	-0.0754	0.1368	-0.0153	0.1266	-0.0205	-0.0602	65
277	1	34.9885	0	1	0	0.0908	0.0303	-0.085	-0.0183	-0.0818	-0.0459	0.0142	-0.0499	0.0324	-0.0005	62
278	2	32.5394	0	0	0	0.0208	-0.0524	0.0779	0.0357	0.0343	0.0516	0.0095	-0.0196	0.0246	-0.0495	20
279	2	37.1823	0	1	0	0.0566	0.0133	0.0097	0.0422	-0.0888	0.0081	-0.1114	0.0099	0.0092	0.0181	8
280	1	46.5863	0	0	0	0.0117	0.0091	-0.0442	0.0239	-0.0303	0.0261	-0.0265	-0.0006	0.0186	-0.0026	42
281	1	35.8818	0	0	0	0.0826	-0.1058	0.0239	0.013	0.0154	0.0831	-0.0076	0.0311	0.0204	-0.0169	46
282	1	35.6095	0	0	0	0.0581	-0.0097	-0.1807	0.0597	-0.0582	-0.014	-0.0657	0.0505	0.0815	-0.0568	70
283	2	38.2699	0	0	0	0.067	0.0015	-0.0427	0.0305	-0.0642	0.0299	-0.0502	0.0204	0.0071	0.009	37
284	2	31.8975	0	1	0	0.0818	0.016	-0.0711	0.0153	-0.0586	0.0201	-0.0179	0.0372	0.0488	0.0113	70
285	2	43.3438	0	1	0	-0.015	-0.0001	0.0378	0.0151	-0.0517	-0.0234	-0.1182	-0.0784	-0.0766	-0.0311	24
286	2	49.6071	0	1	0	-0.0962	-0.0179	0.0066	-0.0167	-0.0556	-0.0275	-0.0565	-0.0531	-0.0671	-0.0131	64
287	2	50.5435	0	0	0	-0.0026	-0.008	0.0581	0.0232	-0.1011	-0.003	-0.167	-0.127	-0.1035	0.011	35
288	2	49.492	0	0	0	0.0454	0.0937	0.0381	0.0029	0.0479	0.0281	-0.0286	0.0151	-0.0212	0.0371	49
289	2	43.6164	0	0	1	-0.0203	0.0761	0.0311	0.0015	0.0311	0.0341	-0.0197	-0.0139	-0.031	0.06	22
290	2	60.7543	0	0	0	0.0319	0.0078	-0.0149	-0.0465	-0.0425	-0.0042	0.0358	-0.0156	-0.0405	0.0505	28
291	2	38.9175	0	1	0	0.0798	0.0234	-0.0997	-0.0136	-0.065	-0.0351	0.0014	-0.0295	0.024	-0.0044	53
292	2	37.5446	0	1	0	0.0527	0.0404	-0.0633	-0.0043	-0.1059	-0.0708	0.0139	-0.0131	0.0518	0.0592	14
293	1	60.828	0	0	0	-0.0738	0.0506	0.0768	0.0418	0.0475	0.0118	-0.0155	0.0365	0.035	-0.0408	49
294	2	43.3049	0	0	0	-0.0127	0.0109	0.0796	0.025	-0.0861	-0.0031	-0.1679	-0.1247	-0.0949	0.0238	36
295	2	49.9933	0	0	0	-0.0632	0.0951	0.1171	-0.0342	0.0093	-0.1055	-0.0178	0.1986	0.15	-0.0842	42
296	2	49.8395	0	0	0	0.0782	0.0273	0.0341	0.0133	-0.0229	-0.0024	-0.0249	-0.0036	0.0019	-0.0114	26
297	1	67.9474	0	0	0	-0.0509	0.0386	0.0648	0.0912	0.072	-0.0177	0.037	0.0269	0.0121	-0.0585	31
298	1	45.028	0	0	0	0.098	0.0206	0.0481	0.0109	-0.0317	-0.0037	-0.0295	0.0048	-0.0028	-0.0166	24
299	1	60.7408	0	0	0	-0.0293	0.0133	-0.0054	-0.0072	-0.0489	-0.013	-0.0043	-0.0409	-0.02	-0.0308	20
300	1	38.3526	0	0	0	0.0456	-0.0547	0.0382	0.062	-0.0051	0.1501	0.0012	0.032	0.0432	0.0055	36
301	2	56.2227	0	0	0	-0.0474	0.0633	0.06	-0.0141	-0.0006	-0.0504	0.0026	0.0903	0.0515	-0.0456	9
302	1	59.5846	0	0	0	-0.0064	0.0131	0.0524	-0.011	-0.0082	-0.0453	-0.0167	0.0893	0.0724	-0.0536	11
303	2	37.6392	0	0	0	0.0447	0.0583	0.0127	0.037	0.0715	0.0694	-0.0053	-0.0304	0.0279	0.0473	71
304	1	52.1627	0	0	0	0.0335	0.0293	0.0072	-0.0136	-0.0091	-0.034	0.0063	-0.0148	0.0168	-0.0701	8
305	1	45.9174	1	0	0	0.0311	0.0341	-0.0235	-0.016	-0.0617	-0.0708	0.0253	0.0002	0.0137	-0.0468	38
306	1	55.0574	0	0	0	0.0314	-0.1534	0.0717	0.0864	-0.1029	0.2148	-0.0098	0.0892	0.0471	-0.0498	58
307	2	48.124	0	0	0	0.0934	-0.022	0.0361	-0.0388	-0.0812	-0.1376	0.1323	0.0678	-0.0817	0.0417	79
308	2	37.3091	0	0	0	0.0271	0.2178	0.056	0.0485	0.1786	0.0678	-0.0312	0.0845	-0.1082	-0.0673	85
309	2	33.4311	1	1	0	-0.0044	0.117	0.023	-0.009	0.065	0.0113	-0.0043	0.0724	-0.0185	-0.0316	64
310	2	36.4679	0	0	1	-0.0623	-0.0192	-0.0727	-0.0052	-0.0184	-0.0362	-0.0178	0.0006	0.0075	-0.0076	66
311	1	56.6376	-9	0	0	0.0286	0.0171	0.0423	0.1785	-0.004	-0.0833	0.248	-0.1332	0.0434	0.0143	74
312	1	49.7949	0	0	0	-0.0101	0.061	0.0562	0.2702	0.0847	-0.0582	0.084	-0.0823	-0.0306	0.0513	57
313	2	46.0538	0	0	0	0.0353	0.0116	0.0089	0.0257	-0.0155	-0.0692	0.0675	-0.0088	0.0132	-0.029	24
314	2	42.0521	0	0	0	0.0178	0.0123	-0.0253	0.0806	-0.055	-0.0566	0.0847	-0.052	0.0346	0.0412	6
315	1	58.1251	0	0	0	0.0602	0.0815	0.0049	0.0273	0.0119	-0.0015	0.0468	-0.0319	-0.0521	-0.0368	56
316	2	42.7003	0	0	0	-0.0035	0.0339	-0.0231	0.039	-0.0756	0.0314	-0.1187	-0.1433	-0.0511	-0.0572	58
317	2	57.6121	0	0	0	-0.0741	0.0424	0.0027	-0.0049	0.0417	0.0073	0.0105	0.0199	-0.0483	-0.032	25
318	2	47.6259	0	0	0	0.0959	0.1281	0.0004	-0.0051	0.043	0.0222	0.0038	0.0186	-0.0459	-0.0002	48
319	1	58.747	0	0	0	0.068	0.1091	0.0067	-0.0197	0.0586	0.0111	0.0164	0.0293	-0.0621	-0.0034	48
320	2	47.3568	0	0	0	-0.0828	-0.0019	0.0202	0.0315	-0.0469	0.0148	-0.1002	-0.0764	-0.0935	-0.0587	43
321	1	49.0145	0	0	1	-0.056	0.0815	0.0518	-0.0052	-0.0004	-0.0291	-0.0339	0.1009	0.0739	0.0202	39
322	1	57.7596	0	0	0	0.0245	0.0906	-0.0116	-0.0438	0.0481	0.0478	0.0119	-0.0098	-0.0032	-0.0081	18
323	2	38.9413	0	1	0	0.0778	0.066	-0.0018	-0.025	-0.0277	-0.0109	-0.0359	0.0242	0.0555	0.0821	37
324	2	48.6992	0	0	0	-0.0161	0.0462	-0.0036	-0.0215	-0.0107	0.0279	-0.0097	-0.007	0.0366	0.0767	12
325	2	41.7963	0	1	2	-0.0959	0.0033	-0.058	-0.0779	-0.019	0.0518	0.0444	-0.0814	0.0995	-0.0276	47
326	1	42.7947	0	0	1	-0.1064	0.0143	-0.0439	-0.0613	-0.007	0.0699	0.0402	-0.0769	0.065	0.0195	10
327	2	39.8815	0	1	0	0.0364	-0.0201	-0.127	0.0819	-0.0591	0.0943	-0.069	0.1102	0.0159	-0.0461	36
328	1	50.3659	0	0	0	-0.0023	-0.0158	0.0324	-0.0266	-0.0271	0.0554	0.017	0.0052	-0.0043	0.0294	6
329	2	23.8007	2	1	0	0.0076	0.0572	-0.0089	-0.0842	-0.0017	-0.0077	-0.0202	0.0028	0.0205	-0.083	34
330	2	41.2496	0	1	1	-0.0416	0.146	-0.0337	-0.0819	0.0709	0.0664	-0.0053	0.0384	-0.0098	0.159	29
331	2	31.3953	1	0	1	0.0741	0.0462	0.0133	-0.0601	-0.0242	-0.026	0.038	-0.0248	0.0254	-0.0629	93
332	2	58.1042	0	0	1	-0.0584	0.0657	0.0714	-0.0074	0.0033	-0.0487	-0.0679	0.1136	0.0957	0.0354	46
333	2	39.1594	1	1	1	-0.0709	0.0094	-0.008	-0.0427	-0.0018	-0.0062	-0.012	0.0092	-0.0098	-0.0275	8
334	2	46.669	0	0	0	0.0204	0.1172	0.0289	0.0753	0.0856	0.0201	-0.0064	0.0412	-0.0644	-0.0249	44
335	2	53.7536	0	0	0	-0.0893	0.0515	0.0233	0.0645	0.0498	0.0024	0.0045	0.0385	-0.0863	-0.0087	21
336	2	34.6696	0	0	0	0.0494	0.082	0.0477	0.0273	0.0081	0.0021	-0.0693	0.0587	0.0489	0.0749	78
337	2	44.5043	0	0	1	-0.055	0.0778	0.0505	-0.0134	-0.0013	-0.0334	-0.0439	0.0896	0.0694	0.0029	43
338	1	40.6158	0	1	1	0.0421	0.0206	-0.0136	-0.0527	-0.0777	-0.0269	0.0501	-0.0481	-0.016	0.0657	64
339	1	39.5194	0	1	0	0.0947	0.1168	-0.0296	-0.0868	0.0449	0.0827	-0.001	-0.0102	-0.0105	0.0828	45
340	1	55.9397	0	1	1	-0.0647	0.0211	0.1011	-0.025	-0.0157	-0.0592	-0.112	0.1159	0.1298	0.0734	18
341	1	36.3289	0	1	1	-0.1243	0.0261	0.0263	-0.037	-0.018	-0.0001	-0.0136	0.05	0.0683	0.0491	20
342	2	44.0263	0	0	0	0.0717	0.103	-0.0222	0.0327	0.0312	0.0578	-0.0469	0.0917	-0.1211	-0.0871	39
343	2	53.055	0	0	0	-0.0563	0.0531	-0.0173	0.0194	0.012	0.0336	-0.0311	0.0856	-0.1287	-0.0747	17
344	1	58.5667	0	0	0	-0.0378	0.0717	-0.0114	-0.0677	0.058	0.044	0.0041	-0.0065	-0.0051	0.0993	21
345	2	79.6638	0	0	0	-0.2236	-0.0605	-0.0093	-0.0221	-0.0118	-0.0409	0.0167	0.0184	-0.0712	0.0055	32
346	1	53.1433	0	0	0	0.0577	0.1035	0.0211	-0.0067	0.0558	0.019	0.0071	0.025	-0.0453	-0.0286	42
347	2	33.2608	0	2	0	0.0565	0.0765	-0.0122	-0.0639	0.0448	0.0456	0.0196	-0.0667	0.0591	0.0316	25
348	2	48.4702	0	0	0	0.0217	0.0942	-0.0119	-0.0095	0.0476	0.0486	-0.0231	0.0358	-0.0807	-0.0273	15
349	2	44.846	0	0	0	0.071	0.0919	-0.0251	-0.0815	0.0427	0.0632	0.0072	-0.0864	0.0868	0.0421	22
350	2	41.4039	0	0	0	0.0752	0.1353	0.0402	0.0037	0.055	-0.0075	0.0038	0.0103	-0.0598	-0.0864	52
351	2	44.4212	0	0	0	0.0915	0.1174	-0.0313	-0.0921	0.0399	0.0833	0.0105	-0.0235	0.0083	0.0888	49
352	1	49.9362	0	0	0	0.0368	0.0931	-0.0146	-0.0572	0.03	0.0344	0.0162	0.0344	-0.0028	0.0732	41
353	2	44.2098	0	0	0	0.1202	0.1044	-0.0297	-0.0585	0.0116	0.0649	-0.0012	0.0327	-0.0439	0.0418	56
354	2	33.0109	0	1	1	0.0711	0.1573	0.016	-0.0491	0.1189	0.05	-0.051	0.0197	-0.0058	0.0716	72
355	1	40.8444	0	1	0	0.1063	0.1031	-0.0352	-0.0931	0.022	0.0554	0.0048	0.0014	-0.0016	0.078	18
356	2	29.0535	0	1	0	-0.0736	0.0946	0.049	0.0386	0.0558	0.044	0.0344	0.0533	0.0267	0.021	55
357	2	41.4342	0	0	0	0.0171	0.0876	-0.0115	0.0047	0.0215	0.0424	-0.0323	0.0215	-0.0772	-0.0348	8
358	1	47.7697	0	1	0	0.0327	0.0687	-0.0545	-0.0645	-0.0165	-0.0014	0.0085	0.045	-0.031	-0.0169	48
359	1	50.2333	0	0	0	0.0501	0.1052	-0.0492	-0.0194	0.0101	0.0417	-0.0206	0.0835	-0.1022	-0.0614	11
360	2	34.5013	0	1	1	0.0456	0.1446	0.0138	-0.0901	0.1125	0.1115	-0.0634	-0.0607	-0.0248	0.1346	65
361	2	45.5647	0	0	0	0.059	0.0733	-0.0258	-0.0895	-0.0094	0.0064	0.0221	0.0461	0.0046	0.0233	54
362	2	57.8042	0	0	0	-0.1827	-0.0348	-0.0218	-0.0362	-0.0084	-0.0044	0.0231	0.0047	-0.0761	0.0584	27
363	1	60.0594	0	0	0	-0.0511	0.0415	-0.0207	-0.0962	-0.0241	0.0028	0.0265	0.0742	-0.0229	0.0141	14
364	2	44.2174	0	1	0	0.0712	-0.0037	-0.0111	0.0033	-0.0259	0.0222	-0.0543	-0.0241	-0.0322	-0.0384	35
365	2	46.7055	0	0	0	0.1048	0.0058	-0.0192	-0.024	-0.0788	-0.0646	0.0554	-0.0195	-0.1347	-0.0637	38
366	2	46.4126	0	1	0	0.0283	-0.0202	-0.129	0.0666	-0.0695	0.097	-0.0655	0.1301	0.0334	-0.0636	7
367	2	51.3158	0	0	0	-0.0507	-0.0145	-0.0212	-0.0212	-0.0701	-0.0572	0.0462	-0.0109	-0.1274	-0.0541	15
368	2	46.044	0	0	0	0.1409	-0.0156	-0.0244	-0.0648	-0.0901	-0.0789	0.0857	0.0171	-0.0864	-0.0012	71
369	2	34.5492	0	1	0	0.1132	0.0461	-0.0413	-0.0463	-0.0604	-0.0228	0.0284	0.0044	0.0226	0.0887	51
370	2	56.5267	0	1	0	0.0871	0.1225	-0.046	-0.0875	0.0248	0.0387	0.0208	0.0205	-0.0042	0.0997	23
371	1	41.8082	0	0	0	0.1083	0.0382	-0.035	-0.0242	-0.059	0.0398	0.0104	0.0459	-0.0181	0.065	43
372	1	62.0127	0	0	0	0.0312	0.1768	-0.0414	-0.1436	0.0806	0.0875	0.0198	0.0393	-0.0179	0.1193	54
373	1	41.9708	0	0	0	0.0232	-0.0085	-0.1736	0.0877	-0.0632	0.0907	-0.1257	0.1642	0.0459	-0.1072	16
374	2	39.9796	0	0	0	-0.0165	0.0404	0.0161	-0.0058	0.0195	-0.011	-0.0059	0.0509	-0.0058	-0.0255	23
375	2	38.6465	0	2	0	0.0282	-0.0138	-0.1094	0.0761	-0.0655	0.1106	-0.0687	0.1315	0.0376	-0.0605	10
376	1	40.8481	0	0	0	0.0932	0.0307	-0.0968	0.0113	-0.0807	-0.0252	-0.0205	-0.0285	0.0573	0.0467	67
377	2	56.2216	0	0	0	0.0919	-0.0127	-0.0468	-0.0365	-0.0471	-0.002	0.0166	-0.0012	-0.0192	-0.0325	47
378	1	38.1528	0	1	0	-0.018	-0.0455	-0.0115	-0.0347	-0.0498	0.0187	0.0537	0.0511	-0.0385	0.0686	7
379	2	37.7949	0	1	1	-0.0246	-0.0225	-0.0446	0.0021	-0.0201	-0.0844	0.0437	0.0379	-0.0179	0.0671	13
380	2	56.2711	0	0	0	0.045	0.0076	-0.1229	0.1223	-0.0429	0.0271	-0.0343	0.0794	0.0396	0.0262	64
381	1	47.9012	0	1	0	0.0003	0.0166	-0.0965	0.1598	-0.0601	0.0065	0.02	0.0322	0.0521	0.0734	12
382	2	58.8116	0	0	0	-0.0452	-0.0395	-0.0157	-0.0175	-0.0288	0.0155	0.0293	0.0406	-0.0258	0.0066	13
383	1	45.7815	0	0	0	0.0561	-0.0481	-0.0587	0.0683	-0.0923	0.1058	-0.0012	0.1035	0.0074	-0.0045	46
384	1	45.242	0	0	1	0.066	0.09	-0.0182	0.0195	0.0209	0.0741	-0.0617	0.0783	-0.0996	-0.1145	21
385	1	41.4416	0	1	0	0.0714	-0.1402	0.0276	0.0293	0.0424	0.0883	-0.0339	0.0587	0.0082	-0.0133	52
386	2	43.0335	0	1	0	0.06	-0.1278	0.0015	-0.0276	0.1116	0.0032	0.005	0.0028	0.0067	-0.0184	75
387	1	45.3723	0	0	0	0.0753	0.0148	-0.1266	0.0496	-0.0444	-0.0098	-0.0228	0.0064	0.045	0.028	26
388	1	51.5296	0	0	0	0.117	0.0258	-0.0233	-0.0278	-0.0928	-0.0762	0.0312	-0.0221	-0.1611	-0.0575	41
389	2	49.4711	0	0	0	0.0421	0.0119	-0.1235	0.083	-0.0122	0.0128	-0.0398	0.0556	0.0303	0.011	60
390	2	46.3136	0	1	0	0.0326	0.0301	-0.0766	0.0068	-0.0611	0.029	-0.0163	0.0092	0.0215	0.0479	6
391	2	48.3768	0	0	0	0.0585	0.0789	0.0121	0.0483	0.0238	0.0061	0.0462	-0.0313	-0.0487	-0.0521	45
392	1	49.2294	0	1	0	0.0628	-0.0375	-0.0599	0.0444	-0.0967	0.0851	0.0022	0.1143	0.0026	0.0005	56
393	1	38.1472	0	0	0	0.0499	-0.0591	-0.0559	0.0674	-0.0977	0.1014	0.0163	0.1234	0.0112	-0.0059	60
394	1	20.6611	2	0	0	-0.0612	0.0697	0.1384	-0.0398	-0.0849	-0.1186	-0.0885	0.0717	0.118	-0.0964	24
395	2	51.6324	0	0	0	0.0554	0.0121	0.0503	-0.0212	-0.1044	-0.0251	-0.001	-0.0557	0.0964	-0.0697	24
396	2	43.6908	0	0	0	-0.0247	0.0328	-0.0025	0.0183	0.0039	0.0055	0.0197	-0.0279	-0.0212	-0.0238	17
397	1	52.9783	0	0	0	0.0453	0.0926	-0.0075	-0.1069	-0.0105	-0.0233	0.0169	0.0263	0.048	0.0228	38
398	1	40.7925	0	0	0	0.0606	0.0235	0.0723	-0.0409	-0.1243	-0.2295	0.1027	0.1059	-0.0491	0.0454	10
399	1	41.4438	0	0	0	0.0933	0.003	0.0743	-0.0281	-0.1058	-0.1859	0.0948	0.0635	-0.0647	0.0748	42
400	2	41.0097	-9	0	0	0.0592	0.0178	0.05	-0.0358	-0.0945	-0.1715	0.0931	0.0787	-0.035	0.0328	8
401	2	48.047	0	0	0	0.0499	-0.1298	0.1051	0.006	0.0099	0.0606	0.023	-0.0092	-0.0027	-0.0211	58
402	1	39.2688	0	0	0	0.0598	0.0625	0.0479	0.0272	-0.0046	-0.0033	-0.0629	0.0343	0.058	0.0542	69
403	2	44.4683	0	0	1	-0.0262	-0.0572	-0.0039	-0.0442	0.0248	-0.0319	0.0414	0.0107	-0.0474	0.0044	63
404	2	46.5033	0	0	0	-0.0467	0.03	0.0638	0.1065	0.015	-0.0569	0.0113	0.0072	0.0046	0.1374	12
405	1	72.2295	0	0	0	-0.0326	0.0299	0.0018	0.0001	0.0077	-0.0085	-0.041	0.0048	0.0175	0.0571	51
406	1	44.464	0	0	0	0.0651	-0.1377	-0.1136	0.013	0.1705	-0.1891	-0.124	-0.0091	0.0461	0.0513	16
408	1	50.23	0	0	0	0.0115	-0.0645	0.0189	-0.0196	-0.004	0.0283	0.0351	-0.0115	-0.0097	-0.0444	13
409	2	53.3254	0	0	0	0.0094	-0.0519	0.0029	-0.0212	-0.0018	0.0299	0.0266	-0.0175	-0.0028	-0.041	11
410	2	48.6269	0	0	1	0.022	-0.0807	0.028	-0.0292	0.0002	0.0562	0.0404	-0.0242	-0.0018	-0.0653	8
411	2	58.6652	0	0	0	-0.0676	-0.1005	-0.0151	-0.025	0.0337	0.0465	0.0379	0.0304	-0.0513	-0.0324	11
412	1	36.8668	0	0	0	0.1063	-0.0473	0.0034	-0.0177	-0.0336	0.0458	0.0269	-0.0111	0.0086	-0.0259	46
413	2	40.7075	0	0	1	0.0048	-0.0542	0.0077	-0.0245	-0.006	0.0316	0.033	-0.0033	-0.0094	-0.0442	15
414	2	51.4515	0	0	0	0.0579	0.0066	0.0016	0.0584	0.0096	-0.0254	-0.0691	-0.043	0.1248	0.0147	10
415	1	48.9925	0	0	0	-0.0164	-0.0657	-0.0488	-0.0595	0.0181	0.1144	0.0456	-0.0265	0.0954	-0.1505	15
416	1	45.3278	0	0	0	0.0308	-0.0285	-0.0093	-0.056	-0.0113	0.0198	0.0355	-0.0222	-0.0407	0.1005	39
417	2	35.2599	0	1	1	-0.0444	0.0691	0.0277	-0.0269	-0.0155	0.007	-0.0168	0.0349	0.0803	0.043	41
418	1	41.6191	0	0	0	0.0352	-0.0166	-0.0119	-0.0464	-0.0102	0.0057	0.0301	-0.0202	-0.024	0.0597	16
419	1	34.2216	0	1	0	0.1024	-0.1054	0.006	-0.0492	0.0801	0	0.0318	0.0172	-0.0094	0.0111	14
420	2	48.4947	0	0	0	0.0936	-0.0411	-0.0081	-0.0639	-0.0065	-0.0083	0.0268	-0.0182	-0.0203	0.0437	37
421	1	46.0873	0	0	0	0.0953	-0.1085	0.0281	-0.0408	0.0682	-0.0586	0.0332	-0.0008	0.0074	0.0401	51
422	2	40.797	0	0	0	0.0436	0.1665	-0.011	-0.0699	0.1064	0.0986	-0.0215	-0.0163	-0.0413	0.1127	35
423	2	45.5449	0	0	1	0.0086	-0.06	0.0037	-0.0336	-0.0018	0.0255	0.038	-0.0125	-0.008	-0.0509	6
424	1	54.1702	0	1	0	0.085	0.0421	-0.0027	-0.0285	-0.0519	-0.0275	0.0262	-0.0444	0.0259	-0.0432	80
425	1	48.0623	0	1	0	-0.0135	-0.0053	0.0597	0.0162	-0.0826	-0.047	-0.1754	-0.1395	-0.1262	-0.0338	38
426	1	38.8021	0	1	0	0.0525	0.0218	-0.0793	-0.1161	-0.0695	0.0212	0.0866	-0.1621	0.1379	-0.0977	61
427	1	42.8517	0	1	0	0.0401	0.0596	-0.0509	-0.0738	-0.0038	0.0414	0.0217	-0.019	-0.0062	-0.0176	11
428	2	41.6854	0	1	0	0.0477	0.0548	-0.0497	-0.0847	-0.0233	0.0399	0.0185	-0.022	-0.0024	-0.0234	10
429	2	41.9125	0	0	0	0.058	0.0666	0.0367	0.0264	0.0184	0.011	-0.0508	0.0266	0.0506	0.0639	73
430	1	49.2277	0	0	0	0.0676	-0.036	-0.0539	0.0831	-0.084	0.0839	0.0236	0.1007	0.0523	0.0008	17
431	2	41.734	0	0	0	0.0707	0.075	0.0457	0.0223	0.0014	-0.017	-0.0761	0.0276	0.0438	0.0912	76
432	2	57.5706	0	0	0	0.0502	0.0629	-0.0502	-0.0635	-0.0229	0.052	-0.0085	0.0217	-0.0556	0.0092	32
433	2	30.7041	0	0	2	-0.092	0.0373	0.003	-0.0895	-0.0183	0.0653	0.0313	-0.0544	0.0287	0.066	52
434	2	41.2777	0	0	1	-0.0641	0.0315	-0.0224	-0.0864	-0.0125	0.0537	0.0414	-0.0655	0.0888	0.0165	23
436	1	37.4442	0	1	0	0.0151	0.0304	0.0252	-0.0291	0.0455	0.0182	-0.0041	-0.0875	0.1162	-0.0436	59
437	2	46.1756	0	0	1	-0.0652	0.0497	0.0057	-0.0447	0.0583	0.0405	-0.0281	-0.0447	-0.0307	0.0752	48
438	2	38.2908	0	0	0	0.0684	0.1283	0.0282	-0.0003	0.06	-0.0062	0.004	0.0251	-0.0726	-0.0577	14
439	2	42.8267	0	0	0	-0.0418	-0.0165	0.046	-0.0263	-0.0951	-0.165	0.1185	0.047	-0.0972	0.0663	16
440	1	45.2497	0	0	0	-0.0164	-0.0245	-0.0872	0.0519	0.1071	-0.0798	-0.1095	0.0146	0.0224	0.0197	16
441	2	36.6136	0	1	0	-0.0014	-0.0213	0.0142	-0.0363	0.0602	-0.0063	-0.007	-0.1008	0.0832	-0.061	32
442	2	29.0632	0	1	0	0.0307	0.1069	-0.0885	-0.1245	0.0685	0.1028	0.0315	-0.0721	0.0691	0.0034	49
443	1	69.3011	0	0	0	-0.1062	-0.0064	0.0187	0.0357	-0.0658	0.0424	-0.1384	-0.0997	-0.1393	-0.0834	41
444	1	58.0824	0	1	0	-0.0998	0.0115	-0.0594	-0.1091	-0.0248	0.0666	0.0652	-0.0912	0.1557	-0.0692	39
445	1	34.2771	0	1	0	-0.0553	0.0709	-0.0759	-0.1056	0.0654	0.1036	0.0309	-0.0653	0.0314	0.0084	24
446	2	40.3422	0	0	1	-0.0105	0.0454	-0.0716	-0.1087	-0.016	0.06	0.0576	-0.1066	0.1548	-0.0743	75
447	1	58.2669	0	0	1	-0.1001	0.0101	-0.075	-0.0948	-0.0404	0.0443	0.049	-0.1263	0.1024	-0.0709	54
448	2	41.8213	0	0	0	0.0561	0.0839	0.0552	0.0239	0.0027	0.008	-0.0897	0.0555	0.0778	0.0891	71
449	1	70.0684	0	0	1	-0.1	-0.0663	-0.0421	0.0012	-0.0488	0.0775	-0.0112	0.0732	-0.0372	-0.0621	20
450	2	51.2468	0	0	0	0.0397	-0.0275	-0.0001	-0.0282	-0.0011	-0.0173	0.0051	0.0123	-0.0294	-0.0197	11
451	1	44.3369	0	1	0	0.054	0.1206	-0.0382	-0.0625	0.0418	0.0548	0.0354	0.0304	-0.0141	0.1216	44
452	1	48.7331	0	1	0	-0.0382	0.0051	0.1094	0.0221	-0.0164	-0.0363	-0.0906	0.0243	0.1101	0.1234	18
453	2	46.0187	0	0	0	0.076	0.0943	0.0233	-0.0034	0.0419	0.0036	0.0206	0.0073	-0.042	-0.0477	57
454	2	40.928	0	0	0	0.06	-0.0498	-0.0511	0.0103	0.0788	-0.0831	0.0321	0.0641	-0.0784	0.0002	13
455	1	51.5299	0	0	0	0.122	0.0918	-0.0259	-0.0566	0.0117	0.0485	-0.0098	0.0184	-0.0436	0.0542	52
456	2	36.9339	0	0	0	0.0562	0.0737	0.0451	0.0136	0.0073	0	-0.0645	0.0482	0.0551	0.0715	65
457	2	39.4353	0	0	0	0.0768	0.0472	-0.0252	-0.0137	-0.0079	-0.0141	0.0015	0.0121	-0.026	-0.0299	32
458	1	36.6288	0	1	0	0.038	-0.0482	0.1623	0.0143	0.0012	-0.0136	-0.1237	0.0227	0.1353	0.1194	68
459	1	39.9167	0	0	0	-0.0136	-0.015	-0.1042	0.0452	0.1364	-0.1118	-0.1489	0.036	0.022	0.0262	14
460	1	46.362	0	0	0	0.0485	0.035	-0.0285	0.008	-0.0479	-0.0224	0.0362	-0.0295	-0.0193	-0.0429	59
461	1	74.7594	0	0	0	-0.1769	-0.0244	0.0513	-0.0591	-0.0834	-0.0858	-0.0471	-0.0306	-0.0241	-0.065	18
462	1	44.0806	0	1	0	0.0301	0.0501	0.0532	0.0036	0.058	0.0357	-0.0174	-0.0691	0.0769	0.0179	32
463	2	39.2792	0	0	0	-0.0181	-0.0332	-0.0798	0.032	0.0985	-0.0705	-0.0828	0.019	0.0229	0.0452	26
464	2	38.7541	0	0	0.0283	-0.1889	0.0532	0.133	-0.1307	-0.1387	0.0088	0.0339	0.0253	47
		0
